# Supplementary material for: CRISPR-Cas9 screens identify regulators of antibody–drug conjugate toxicity
Source: Springer Nature journal article supplement (doi:10.1038/s41589-019-0342-2), 2019-08-26
Supplement: MOESM3 [file 41589_2019_342_MOESM3_ESM%20(1).xlsx]

## Sheet: Legend
Sheets
Genome-wide combo	casTLE results from combining replicate 1 and 2
Genome-wide replicate 1	casTLE results from untreated versus anti-CD22-maytansine (noncleavable) replicate 1 in Ramos cells
Genome-wide replicate 2	casTLE results from untreated versus anti-CD22-maytansine (noncleavable) replicate 2 in Ramos cells

## Sheet: Genome-wide Combo
#GeneID	Symbol	GeneInfo	Combo casTLE Effect	Combo casTLE Score	Minimum Effect Estimate	Maximum Effect Estimate	casTLE p-value	pass 10% FDR	q-value
ENSG00000012124	CD22	CD22 molecule	7.3	519	6.6	9	9.9e-07	1	0.0202455
ENSG00000139508	SLC46A3	solute carrier family 46, member 3	7.5	481	6.5	9.1	9.9e-07	1	0.0101227
ENSG00000161091	MFSD12	major facilitator superfamily domain containing 12	6.3	266	5.4	7.8	9.9e-07	1	0.0067485				pass 10% FDR
ENSG00000167716	WDR81	WD repeat domain 81	7	252	5.5	8.9	9.9e-07	1	0.00506137				1 = true
ENSG00000105875	WDR91	WD repeat domain 91	5.7	145	4.6	7.5	9.9e-07	1	0.0040491				0 = false
ENSG00000144224	UBXN4	UBX domain protein 4	4.4	117	3.5	5.7	9.9e-07	1	0.00337425
ENSG00000108039	XPNPEP1	X-prolyl aminopeptidase (aminopeptidase P) 1, soluble	4.1	115	3.4	5.5	9.9e-07	1	0.00289221
ENSG00000133895	MEN1	multiple endocrine neoplasia I	4.2	112	3.4	5.5	9.9e-07	1	0.00253069
ENSG00000184207	PGP	phosphoglycolate phosphatase	4.5	104	3.4	6	9.9e-07	1	0.0022495
ENSG00000064601	CTSA	cathepsin A	3.8	93.1	2.9	6.1	9.9e-07	1	0.00202455
ENSG00000169813	HNRNPF	heterogeneous nuclear ribonucleoprotein F	4.3	91.9	3.3	5.5	9.9e-07	1	0.0018405
ENSG00000186416	NKRF	NFKB repressing factor	3.8	91.8	3	5	9.9e-07	1	0.00168713
ENSG00000075785	RAB7A	RAB7A, member RAS oncogene family	4.4	87.6	3.4	6	9.9e-07	1	0.00155735
ENSG00000168421	RHOH	ras homolog family member H	3.9	82.5	3	5.2	9.9e-07	1	0.00144611
ENSG00000163349	HIPK1	homeodomain interacting protein kinase 1	4.7	80.5	3.6	6.3	9.9e-07	1	0.0013497
ENSG00000040531	CTNS	cystinosin, lysosomal cystine transporter	3.8	77.5	2.9	5.1	9.9e-07	1	0.00126534
ENSG00000115758	ODC1	ornithine decarboxylase 1	3.5	69	2.6	4.8	9.9e-07	1	0.00119091
ENSG00000163131	CTSS	cathepsin S	3.7	63	2.8	5	9.9e-07	1	0.00112475
ENSG00000163875	MEAF6	MYST/Esa1-associated factor 6	4	60.9	2.9	5.7	9.9e-07	1	0.00106555
ENSG00000108107	RPL28	ribosomal protein L28	4	60.5	3	5.4	9.9e-07	1	0.00101227
ENSG00000104885	DOT1L	DOT1-like histone H3K79 methyltransferase	3.9	60.1	2.7	6.1	9.9e-07	1	0.000964071
ENSG00000167182	SP2	Sp2 transcription factor	3.8	60	2.8	5.6	9.9e-07	1	0.00092025
ENSG00000118058	KMT2A	lysine (K)-specific methyltransferase 2A	3.5	58.1	2.5	4.8	9.9e-07	1	0.000880239
ENSG00000131944	C19ORF40	chromosome 19 open reading frame 40	4	56.8	2.8	5.7	9.9e-07	1	0.000843563
ENSG00000170684	ZNF296	zinc finger protein 296	6.9	56.7	3.8	10.8	9.9e-07	1	0.00080982
ENSG00000114902	SPCS1	signal peptidase complex subunit 1 homolog (S. cerevisiae)	4.2	55.3	3.3	6.4	9.9e-07	1	0.000778673
ENSG00000204120	GIGYF2	GRB10 interacting GYF protein 2	-3	53.7	-4.3	-2	9.9e-07	1	0.000749833
ENSG00000120690	ELF1	E74-like factor 1 (ets domain transcription factor)	4	52.4	2.7	5.6	9.9e-07	1	0.000723054
ENSG00000077044	DGKD	diacylglycerol kinase, delta 130kDa	-2.9	51	-4.3	-2.1	9.9e-07	1	0.000698121
ENSG00000010671	BTK	Bruton agammaglobulinemia tyrosine kinase	2.9	51	2.2	4.1	9.9e-07	1	0.00067485
ENSG00000153015	CWC27	CWC27 spliceosome-associated protein homolog (S. cerevisiae)	3.8	48.4	2.5	5.5	1.98e-06	1	0.00130616
ENSG00000081154	PCNP	PEST proteolytic signal containing nuclear protein	3.4	48.2	2.4	4.8	1.98e-06	1	0.00126534
ENSG00000141452	C18ORF8	chromosome 18 open reading frame 8	3.4	47.8	2.4	4.8	1.98e-06	1	0.001227
ENSG00000198445	CCT8L2	chaperonin containing TCP1, subunit 8 (theta)-like 2	6.9	47.8	4	11.7	1.98e-06	1	0.00119091
ENSG00000120526	NUDCD1	NudC domain containing 1	2.8	47.7	2.1	3.9	1.98e-06	1	0.00115689
ENSG00000130313	PGLS	6-phosphogluconolactonase	3	47.4	2.2	4.3	1.98e-06	1	0.00112475
ENSG00000197713	RPE	ribulose-5-phosphate-3-epimerase	2.7	47.2	2	4	2.97e-06	1	0.00164153
ENSG00000155903	RASA2	RAS p21 protein activator 2	-3.5	46.9	-5.2	-2.3	2.97e-06	1	0.00159833
ENSG00000169045	HNRNPH1	heterogeneous nuclear ribonucleoprotein H1 (H)	6.6	46.8	4.2	11.9	2.97e-06	1	0.00155735
ENSG00000172348	RCAN2	regulator of calcineurin 2	6.1	46.5	3.3	10.2	2.97e-06	1	0.00151841
ENSG00000168710	AHCYL1	adenosylhomocysteinase-like 1	2.8	45.2	2	4	3.96e-06	1	0.00197517
ENSG00000134954	ETS1	v-ets avian erythroblastosis virus E26 oncogene homolog 1	3.5	45.2	2.5	5	3.96e-06	1	0.00192814
ENSG00000135930	EIF4E2	eukaryotic translation initiation factor 4E family member 2	-3.1	44.2	-4.7	-2.1	3.96e-06	1	0.0018833
ENSG00000109332	UBE2D3	ubiquitin-conjugating enzyme E2D 3	-3	43.5	-4.3	-2	3.96e-06	1	0.0018405
ENSG00000124357	NAGK	N-acetylglucosamine kinase	3.7	42.6	2.6	5.3	4.95e-06	1	0.0022495
ENSG00000151923	TIAL1	TIA1 cytotoxic granule-associated RNA binding protein-like 1	-3	41.3	-4.5	-2	6.93e-06	1	0.00308084
ENSG00000125968	ID1	inhibitor of DNA binding 1, dominant negative helix-loop-helix protein	6.5	40.8	4.3	12.3	7.92e-06	1	0.00344604
ENSG00000254469	RP11-849H4.2	N/A	6.7	40.4	4.2	12.6	8.91e-06	1	0.00379603
ENSG00000182916	TCEAL7	transcription elongation factor A (SII)-like 7	6.4	39.8	4.5	13.7	9.9e-06	1	0.00413173
ENSG00000182866	LCK	LCK proto-oncogene, Src family tyrosine kinase	3.2	38.7	2.2	5	1.19e-05	1	0.0048671
ENSG00000185697	MYBL1	v-myb avian myeloblastosis viral oncogene homolog-like 1	-3.1	37.5	-4.7	-2	1.39e-05	1	0.00557363
ENSG00000124302	CHST8	carbohydrate (N-acetylgalactosamine 4-0) sulfotransferase 8	3.2	37.1	2.1	4.8	1.39e-05	1	0.00546644
ENSG00000132780	NASP	nuclear autoantigenic sperm protein (histone-binding)	6.3	36.1	3.2	11.4	1.49e-05	1	0.00574915
ENSG00000159399	HK2	hexokinase 2	2.6	36	1.7	3.9	1.49e-05	1	0.00564269
ENSG00000187522	HSPA14	heat shock 70kDa protein 14	2.7	35.9	1.9	4.2	1.49e-05	1	0.00554009
ENSG00000067955	CBFB	core-binding factor, beta subunit	2.7	35.4	1.8	4.2	1.49e-05	1	0.00544116
ENSG00000163931	TKT	transketolase	2.6	35.2	1.8	4	1.49e-05	1	0.0053457
ENSG00000100522	GNPNAT1	glucosamine-phosphate N-acetyltransferase 1	3.3	34.4	2	5	1.58e-05	1	0.00557086
ENSG00000197084	LCE1C	late cornified envelope 1C	4.9	34.2	2.8	10	1.58e-05	1	0.00547644
ENSG00000186185	KIF18B	kinesin family member 18B	2.5	34.2	1.7	3.6	1.58e-05	1	0.00538517
ENSG00000117394	SLC2A1	solute carrier family 2 (facilitated glucose transporter), member 1	2.7	33.9	1.8	4.3	1.78e-05	1	0.00596738
ENSG00000067225	PKM	pyruvate kinase, muscle	5.6	33.9	3.1	11.1	1.78e-05	1	0.00587113
ENSG00000123179	EBPL	emopamil binding protein-like	7.2	33.9	4.9	14	1.78e-05	1	0.00577794
ENSG00000007312	CD79B	CD79b molecule, immunoglobulin-associated beta	3.1	33.7	2	4.7	1.78e-05	1	0.00568766
ENSG00000104946	TBC1D17	TBC1 domain family, member 17	4.5	33.7	2.6	9.4	1.78e-05	1	0.00560015
ENSG00000268953	AC020952.1	N/A	2.6	33.7	1.7	4	1.78e-05	1	0.0055153
ENSG00000164985	PSIP1	PC4 and SFRS1 interacting protein 1	2.5	33.7	1.7	4	1.78e-05	1	0.00543299
ENSG00000069122	GPR116	G protein-coupled receptor 116	4.3	33.6	2	8.1	1.78e-05	1	0.00535309
ENSG00000081985	IL12RB2	interleukin 12 receptor, beta 2	4.1	32.7	2.8	6.9	1.98e-05	1	0.00586826
ENSG00000089356	FXYD3	FXYD domain containing ion transport regulator 3	3.1	31.7	1.8	4.7	2.77e-05	1	0.00809236
ENSG00000133561	GIMAP6	GTPase, IMAP family member 6	-2.7	31.6	-5.7	-1.5	2.77e-05	1	0.00797838
ENSG00000198034	RPS4X	ribosomal protein S4, X-linked	5.6	31.3	3.9	10.2	2.77e-05	1	0.00786757
ENSG00000174840	PDE12	phosphodiesterase 12	6	30.9	2.3	10.4	2.77e-05	1	0.00775979
ENSG00000105220	GPI	glucose-6-phosphate isomerase	2.5	30.9	1.6	3.9	2.77e-05	1	0.00765493
ENSG00000118513	MYB	v-myb avian myeloblastosis viral oncogene homolog	-2.5	30.8	-4.1	-1.6	2.77e-05	1	0.00755287
ENSG00000241127	YAE1D1	Yae1 domain containing 1	5.4	30.3	3.4	9.6	2.97e-05	1	0.00799164
ENSG00000198563	DDX39B	DEAD (Asp-Glu-Ala-Asp) box polypeptide 39B	3.2	29.9	1.9	4.8	3.17e-05	1	0.00841903
ENSG00000065526	SPEN	spen family transcriptional repressor	-2.9	29.9	-4.5	-1.7	3.17e-05	1	0.00831109
ENSG00000176695	OR4F17	olfactory receptor, family 4, subfamily F, member 17	5.6	29.7	2.9	9.7	3.27e-05	1	0.00846475
ENSG00000139746	RBM26	RNA binding motif protein 26	-2.4	29.5	-4.1	-1.6	3.27e-05	1	0.00835894
ENSG00000167770	OTUB1	OTU deubiquitinase, ubiquitin aldehyde binding 1	-2.3	29.3	-3.6	-1.5	3.27e-05	1	0.00825574
ENSG00000028310	BRD9	bromodomain containing 9	-2.8	29.2	-4.3	-1.7	3.27e-05	1	0.00815506
ENSG00000244038	DDOST	dolichyl-diphosphooligosaccharide--protein glycosyltransferase subunit (non-catalytic)	5.5	29.2	3.5	10.4	3.27e-05	1	0.00805681
ENSG00000175063	UBE2C	ubiquitin-conjugating enzyme E2C	-2.6	28.6	-4.1	-1.7	3.86e-05	1	0.00939726
ENSG00000121775	TMEM39B	transmembrane protein 39B	3.6	28.5	2.2	5.5	3.96e-05	1	0.00952729
ENSG00000269897	COMMD3-BMI1	COMMD3-BMI1 readthrough	3	28.3	1.9	5.1	4.16e-05	1	0.00989209
ENSG00000125430	HS3ST3B1	heparan sulfate (glucosamine) 3-O-sulfotransferase 3B1	4.7	28.3	2.4	8.1	4.16e-05	1	0.00977839
ENSG00000197943	PLCG2	phospholipase C, gamma 2 (phosphatidylinositol-specific)	2.4	28	1.5	3.7	4.55e-05	1	0.0105736
ENSG00000138107	ACTR1A	ARP1 actin-related protein 1 homolog A, centractin alpha (yeast)	-2.7	28	-4.5	-1.6	4.55e-05	1	0.0104548
ENSG00000123136	DDX39A	DEAD (Asp-Glu-Ala-Asp) box polypeptide 39A	2.6	28	1.6	3.9	4.55e-05	1	0.0103386
ENSG00000169188	APEX2	APEX nuclease (apurinic/apyrimidinic endonuclease) 2	2.6	27.9	1.6	3.8	4.85e-05	1	0.0108992
ENSG00000272047	GTF2H5	general transcription factor IIH, polypeptide 5	-2.8	27.7	-4.4	-1.7	5.25e-05	1	0.0116698
ENSG00000149480	MTA2	metastasis associated 1 family, member 2	2.5	27.7	1.6	4.2	5.25e-05	1	0.0115444
ENSG00000174595	KLF14	Kruppel-like factor 14	5.7	27.7	3	12.2	5.25e-05	1	0.0114215
ENSG00000105401	CDC37	cell division cycle 37	3.3	27.6	2	5.3	5.35e-05	1	0.0115166
ENSG00000138246	DNAJC13	DnaJ (Hsp40) homolog, subfamily C, member 13	-2.7	27.5	-4.4	-1.6	5.35e-05	1	0.0113966
ENSG00000159921	GNE	glucosamine (UDP-N-acetyl)-2-epimerase/N-acetylmannosamine kinase	-2.1	27.3	-3.3	-1.3	5.84e-05	1	0.0123122
ENSG00000266953	RP11-618P17.4	N/A	3.9	27.1	2.1	6.7	6.34e-05	1	0.0132299
ENSG00000134057	CCNB1	cyclin B1	2.4	26.6	1.5	3.9	7.43e-05	1	0.0153478
ENSG00000187135	VSTM2B	V-set and transmembrane domain containing 2B	3	26.6	1.8	4.7	7.43e-05	1	0.0151944
ENSG00000088930	XRN2	5'-3' exoribonuclease 2	6.4	26.2	4.2	13.1	8.22e-05	1	0.0166435
ENSG00000196305	IARS	isoleucyl-tRNA synthetase	6.6	26	4.2	13.2	9.01e-05	1	0.0180642
ENSG00000109861	CTSC	cathepsin C	2.2	25.9	1.3	3.5	9.21e-05	1	0.0182859
ENSG00000056097	ZFR	zinc finger RNA binding protein	2.5	25.9	1.5	4	9.21e-05	1	0.01811
ENSG00000173638	SLC19A1	solute carrier family 19 (folate transporter), member 1	2.4	25.8	1.4	3.7	9.31e-05	1	0.0181323
ENSG00000164708	PGAM2	phosphoglycerate mutase 2 (muscle)	4.1	25.8	1.9	6.2	9.31e-05	1	0.0179613
ENSG00000116459	ATP5F1	ATP synthase, H+ transporting, mitochondrial Fo complex, subunit B1	6.2	25.8	4	12.3	9.31e-05	1	0.0177934
ENSG00000166359	WDR88	WD repeat domain 88	2.7	25.7	1.7	5.1	9.7e-05	1	0.0183671
ENSG00000227057	WDR46	WD repeat domain 46	6.5	25.6	3.9	13.1	0.0001	1	0.0187615
ENSG00000198829	SUCNR1	succinate receptor 1	3.8	25.5	2.3	6.1	0.000107	1	0.0198923
ENSG00000165025	SYK	spleen tyrosine kinase	2.6	25.2	1.5	4.5	0.000126	1	0.0232135
ENSG00000101057	MYBL2	v-myb avian myeloblastosis viral oncogene homolog-like 2	2.8	25	1.6	4.5	0.000142	1	0.0259277
ENSG00000124194	GDAP1L1	ganglioside induced differentiation associated protein 1-like 1	6.5	24.9	4.3	13.3	0.000143	1	0.0258792
ENSG00000141030	COPS3	COP9 signalosome subunit 3	-3	24.9	-7.8	-1.1	0.000143	1	0.0256522
ENSG00000066557	LRRC40	leucine rich repeat containing 40	-2.1	24.8	-3.9	-1.2	0.000147	1	0.0261404
ENSG00000102349	KLF8	Kruppel-like factor 8	5.7	24.8	3.5	11.9	0.000147	1	0.0259151
ENSG00000032219	ARID4A	AT rich interactive domain 4A (RBP1-like)	-2.6	24.6	-4.3	-1.4	0.000158	1	0.0276162
ENSG00000100888	CHD8	chromodomain helicase DNA binding protein 8	2.4	24.5	1.5	3.8	0.000163	1	0.0282487
ENSG00000205076	LGALS7	lectin, galactoside-binding, soluble, 7	3.4	24.4	2	6.1	0.000166	1	0.0285269
ENSG00000085265	FCN1	ficolin (collagen/fibrinogen domain containing) 1	6.1	24.4	3.3	12.1	0.000166	1	0.0282892
ENSG00000099290	FAM21A	family with sequence similarity 21, member A	2.7	24.4	1.6	4.1	0.000166	1	0.0280554
ENSG00000126266	FFAR1	free fatty acid receptor 1	2.9	24.3	1.6	5.1	0.000175	1	0.029334
ENSG00000179151	EDC3	enhancer of mRNA decapping 3	-2.5	24.1	-3.9	-1.4	0.000189	1	0.0314232
ENSG00000131495	NDUFA2	NADH dehydrogenase (ubiquinone) 1 alpha subcomplex, 2, 8kDa	4.4	24.1	2.5	7.6	0.000189	1	0.0311698
ENSG00000089737	DDX24	DEAD (Asp-Glu-Ala-Asp) box helicase 24	6.1	24.1	3.2	12.7	0.000189	1	0.0309204
ENSG00000205209	SCGB2B2	secretoglobin, family 2B, member 2	2.4	23.6	1.5	4	0.000221	1	0.0358687
ENSG00000011485	PPP5C	protein phosphatase 5, catalytic subunit	2.6	23.6	1.5	4.2	0.000221	1	0.0355862
ENSG00000066279	ASPM	asp (abnormal spindle) homolog, microcephaly associated (Drosophila)	-2.3	23.5	-4.1	-1.3	0.000223	1	0.0356277
ENSG00000197451	HNRNPAB	heterogeneous nuclear ribonucleoprotein A/B	-2.5	23.4	-4.2	-1.4	0.000233	1	0.0369368
ENSG00000170370	EMX2	empty spiracles homeobox 2	6.8	23.3	4.4	13.3	0.000241	1	0.0379112
ENSG00000189339	SLC35E2B	solute carrier family 35, member E2B	3.6	23.3	1.5	8.2	0.000241	1	0.0376218
ENSG00000143033	MTF2	metal response element binding transcription factor 2	-2.5	23.3	-4.4	-1.4	0.000241	1	0.0373367
ENSG00000184787	UBE2G2	ubiquitin-conjugating enzyme E2G 2	5.8	23.2	3.8	11.5	0.000248	1	0.0381323
ENSG00000021488	SLC7A9	solute carrier family 7 (amino acid transporter light chain, bo,+ system), member 9	2.4	23.1	1.4	3.9	0.000258	1	0.0393739
ENSG00000182944	EWSR1	EWS RNA-binding protein 1	-2.3	23	-3.8	-1.3	0.000267	1	0.0404456
ENSG00000204278	TMEM235	transmembrane protein 235	4.4	22.9	2.3	8	0.000276	1	0.0415015
ENSG00000149187	CELF1	CUGBP, Elav-like family member 1	1.9	22.8	1.2	3.4	0.000288	1	0.0429898
ENSG00000105171	POP4	processing of precursor 4, ribonuclease P/MRP subunit (S. cerevisiae)	3.1	22.4	1.7	5.4	0.00033	1	0.0489022
ENSG00000266964	FXYD1	FXYD domain containing ion transport regulator 1	2.3	22.3	1.3	4.5	0.000339	1	0.0498745
ENSG00000147050	KDM6A	lysine (K)-specific demethylase 6A	-3.1	22.1	-5.8	-1.5	0.000364	1	0.05317
ENSG00000138629	UBL7	ubiquitin-like 7	-2.8	22.1	-4.6	-1.4	0.000364	1	0.0527929
ENSG00000178904	DPY19L3	dpy-19-like 3 (C. elegans)	2.3	22	1.4	3.9	0.00038	1	0.0547254
ENSG00000144524	COPS7B	COP9 signalosome subunit 7B	-2.7	21.9	-4.7	-1.5	0.000397	1	0.0567738
ENSG00000138018	EPT1	ethanolaminephosphotransferase 1 (CDP-ethanolamine-specific)	6.3	21.9	2.8	12.8	0.000397	1	0.0563795
ENSG00000066336	SPI1	Spi-1 proto-oncogene	2.6	21.8	1.4	4.1	0.000409	1	0.0576831
ENSG00000116649	SRM	spermidine synthase	3.2	21.7	1.5	6	0.000427	1	0.0598092
ENSG00000135451	TROAP	trophinin associated protein	-2.2	21.7	-3.5	-1.1	0.000427	1	0.0594024
ENSG00000172977	KAT5	K(lysine) acetyltransferase 5	3.6	21.6	2.1	5.9	0.000442	1	0.0610736
ENSG00000143742	SRP9	signal recognition particle 9kDa	3.5	21.6	2	6	0.000442	1	0.0606638
ENSG00000131943	C19ORF12	chromosome 19 open reading frame 12	2.3	21.5	1.4	4	0.000459	1	0.062577
ENSG00000095585	BLNK	B-cell linker	2.1	21.3	1.3	3.7	0.000489	1	0.0662255
ENSG00000107798	LIPA	lipase A, lysosomal acid, cholesterol esterase	2.6	21.3	1.5	4.1	0.000489	1	0.0657898
ENSG00000120616	EPC1	enhancer of polycomb homolog 1 (Drosophila)	-2.3	21.3	-3.8	-1.3	0.000489	1	0.0653598
ENSG00000115289	PCGF1	polycomb group ring finger 1	-2.4	21.2	-4	-1.3	0.000511	1	0.0678568
ENSG00000126787	DLGAP5	discs, large (Drosophila) homolog-associated protein 5	-2.4	20.9	-3.9	-1.3	0.000572	1	0.0754671
ENSG00000132773	TOE1	target of EGR1, member 1 (nuclear)	-2.3	20.9	-3.6	-1.3	0.000572	1	0.0749833
ENSG00000148229	POLE3	polymerase (DNA directed), epsilon 3, accessory subunit	3.7	20.8	1.8	6.3	0.000592	1	0.0771108
ENSG00000009954	BAZ1B	bromodomain adjacent to zinc finger domain, 1B	2.8	20.7	1.4	5.5	0.000612	1	0.0792114
ENSG00000185897	FFAR3	free fatty acid receptor 3	3.5	20.7	1.7	6.2	0.000612	1	0.0787132
ENSG00000184007	PTP4A2	protein tyrosine phosphatase type IVA, member 2	3.4	20.7	1.6	5.5	0.000612	1	0.0782212
ENSG00000198597	ZNF536	zinc finger protein 536	2.4	20.7	1.3	3.9	0.000612	1	0.0777354
ENSG00000173473	SMARCC1	SWI/SNF related, matrix associated, actin dependent regulator of chromatin, subfamily c, member 1	2.2	20.6	1.3	3.7	0.000635	1	0.080159
ENSG00000087586	AURKA	aurora kinase A	2.7	20.4	1.4	4.7	0.000697	1	0.0874457
ENSG00000004534	RBM6	RNA binding motif protein 6	2.8	20.4	1.5	4.9	0.000697	1	0.0869125
ENSG00000169122	FAM110B	family with sequence similarity 110, member B	3	20.3	1.8	5.1	0.000726	1	0.08998
ENSG00000089902	RCOR1	REST corepressor 1	2.9	20.2	1.6	5	0.000756	1	0.0931337
ENSG00000105698	USF2	upstream transcription factor 2, c-fos interacting	2.5	20.2	1.3	4	0.000756	1	0.092576
ENSG00000132522	GPS2	G protein pathway suppressor 2	3.7	20.2	1.9	6.2	0.000756	1	0.092025
ENSG00000131941	RHPN2	rhophilin, Rho GTPase binding protein 2	2.5	20.1	1.3	4	0.000783	1	0.0947476
ENSG00000131669	NINJ1	ninjurin 1	-2.7	20.1	-4.6	-1.5	0.000783	1	0.0941903
ENSG00000138395	CDK15	cyclin-dependent kinase 15	-2.3	20.1	-4.2	-1.1	0.000783	1	0.0936395
ENSG00000197587	DMBX1	diencephalon/mesencephalon homeobox 1	5.6	19.9	3.4	11.4	0.000856	0	0.101774
ENSG00000126603	GLIS2	GLIS family zinc finger 2	4.8	19.8	2.2	9.5	0.000901	0	0.106505
ENSG00000179066	AC020907.1	N/A	2	19.8	1.1	3.1	0.000901	0	0.105893
ENSG00000091164	TXNL1	thioredoxin-like 1	-2.5	19.7	-4.9	-1.2	0.000932	0	0.108911
ENSG00000168255	POLR2J3	polymerase (RNA) II (DNA directed) polypeptide J3	5.7	19.7	3.4	11.4	0.000932	0	0.108292
ENSG00000096746	HNRNPH3	heterogeneous nuclear ribonucleoprotein H3 (2H9)	3.3	19.6	1.7	5.8	0.000979	0	0.11311
ENSG00000161980	POLR3K	polymerase (RNA) III (DNA directed) polypeptide K, 12.3 kDa	3.1	19.6	1.7	5.3	0.000979	0	0.112475
ENSG00000134324	LPIN1	lipin 1	2.7	19.5	1.5	4.2	0.00102	0	0.116531
ENSG00000158941	CCAR2	cell cycle and apoptosis regulator 2	-2.1	19.5	-3.4	-1.1	0.00102	0	0.115883
ENSG00000095574	IKZF5	IKAROS family zinc finger 5 (Pegasus)	-2.1	19.5	-3.6	-1.2	0.00102	0	0.115243
ENSG00000198298	ZNF485	zinc finger protein 485	2.3	19.5	1.3	3.9	0.00102	0	0.11461
ENSG00000116237	ICMT	isoprenylcysteine carboxyl methyltransferase	2	19.4	1.2	3.3	0.00105	0	0.117336
ENSG00000137807	KIF23	kinesin family member 23	6.7	19.4	3.9	14	0.00105	0	0.116698
ENSG00000151893	CACUL1	CDK2-associated, cullin domain 1	-2.2	19.3	-3.8	-1.2	0.0011	0	0.121595
ENSG00000163273	NPPC	natriuretic peptide C	2.4	19.3	1.3	3.8	0.0011	0	0.120941
ENSG00000132142	ACACA	acetyl-CoA carboxylase alpha	2.8	19.3	1.5	5.1	0.0011	0	0.120294
ENSG00000009335	UBE3C	ubiquitin protein ligase E3C	-2.3	19.1	-4.1	-1.2	0.0012	0	0.130532
ENSG00000126249	PDCD2L	programmed cell death 2-like	2.6	19	1.3	4.4	0.00124	0	0.134169
ENSG00000172845	SP3	Sp3 transcription factor	-2.5	19	-4.4	-1.4	0.00124	0	0.133463
ENSG00000112237	CCNC	cyclin C	2	19	1.2	3.6	0.00124	0	0.132764
ENSG00000116001	TIA1	TIA1 cytotoxic granule-associated RNA binding protein	-2.9	18.9	-5.4	-1.4	0.0013	0	0.138464
ENSG00000123338	NCKAP1L	NCK-associated protein 1-like	-2.2	18.9	-3.6	-1.2	0.0013	0	0.137746
ENSG00000119402	FBXW2	F-box and WD repeat domain containing 2	-2.5	18.9	-4.5	-1.3	0.0013	0	0.137036
ENSG00000232119	MCTS1	malignant T cell amplified sequence 1	-3.5	18.9	-8.4	-1	0.0013	0	0.136333
ENSG00000162419	GMEB1	glucocorticoid modulatory element binding protein 1	3.4	18.8	1.4	6.8	0.00136	0	0.141898
ENSG00000143387	CTSK	cathepsin K	4	18.6	2	7.1	0.00148	0	0.153635
ENSG00000188342	GTF2F2	general transcription factor IIF, polypeptide 2, 30kDa	-2.3	18.6	-4.2	-1.2	0.00148	0	0.152859
ENSG00000185049	NELFA	negative elongation factor complex member A	3.7	18.4	1.7	6.7	0.00164	0	0.168533
ENSG00000108604	SMARCD2	SWI/SNF related, matrix associated, actin dependent regulator of chromatin, subfamily d, member 2	2.3	18.4	1.2	4.2	0.00164	0	0.16769
ENSG00000160957	RECQL4	RecQ protein-like 4	2.3	18.4	1.2	3.9	0.00164	0	0.166856
ENSG00000142252	GEMIN7	gem (nuclear organelle) associated protein 7	2.8	18.3	1.7	4.9	0.0017	0	0.172104
ENSG00000159882	ZNF230	zinc finger protein 230	2.8	18.2	1.5	5	0.00179	0	0.180323
ENSG00000086232	EIF2AK1	eukaryotic translation initiation factor 2-alpha kinase 1	3.5	18.1	2	5.8	0.00187	0	0.187458
ENSG00000235194	PPP1R3E	protein phosphatase 1, regulatory subunit 3E	2.6	18.1	1.3	4.2	0.00187	0	0.186544
ENSG00000167384	ZNF180	zinc finger protein 180	3	18	1.4	5	0.00196	0	0.194573
ENSG00000059804	SLC2A3	solute carrier family 2 (facilitated glucose transporter), member 3	3.3	17.9	1.6	5.4	0.00204	0	0.201536
ENSG00000129810	SGOL1	shugoshin-like 1 (S. pombe)	-2.4	17.8	-4.3	-1.1	0.00215	0	0.211382
ENSG00000180884	ZNF792	zinc finger protein 792	2.2	17.8	1.1	3.6	0.00215	0	0.210371
ENSG00000143207	RFWD2	ring finger and WD repeat domain 2, E3 ubiquitin protein ligase	-2.2	17.8	-3.8	-1.2	0.00215	0	0.209369
ENSG00000164880	INTS1	integrator complex subunit 1	5.9	17.7	3	12.4	0.00225	0	0.218069
ENSG00000167230	C17ORF78	chromosome 17 open reading frame 78	3.4	17.6	1.7	5.7	0.00237	0	0.228616
ENSG00000130876	SLC7A10	solute carrier family 7 (neutral amino acid transporter light chain, asc system), member 10	2.4	17.6	1.4	4.1	0.00237	0	0.227542
ENSG00000175792	RUVBL1	RuvB-like AAA ATPase 1	4.2	17.5	2.5	8.6	0.00249	0	0.237946
ENSG00000146006	LRRTM2	leucine rich repeat transmembrane neuronal 2	6.1	17.5	4.1	11.6	0.00249	0	0.23684
ENSG00000126767	ELK1	ELK1, member of ETS oncogene family	2.9	17.4	1.7	5.1	0.00262	0	0.248051
ENSG00000155506	LARP1	La ribonucleoprotein domain family, member 1	-2	17.4	-3.7	-1	0.00262	0	0.246908
ENSG00000197415	VEPH1	ventricular zone expressed PH domain-containing 1	3.7	17.3	1.8	6.3	0.00275	0	0.25797
ENSG00000132680	KIAA0907	KIAA0907	-2.2	17.3	-3.9	-1.1	0.00275	0	0.256792
ENSG00000074319	TSG101	tumor susceptibility 101	-2.4	17.2	-4.5	-1.2	0.00288	0	0.267709
ENSG00000111670	GNPTAB	N-acetylglucosamine-1-phosphate transferase, alpha and beta subunits	2	17.2	1	3.4	0.00288	0	0.266498
ENSG00000139971	C14ORF37	chromosome 14 open reading frame 37	2.8	17.2	1.5	5	0.00288	0	0.265297
ENSG00000120705	ETF1	eukaryotic translation termination factor 1	5.1	17.1	2.8	10.9	0.00301	0	0.276029
ENSG00000145349	CAMK2D	calcium/calmodulin-dependent protein kinase II delta	-2.1	17.1	-3.9	-1.1	0.00301	0	0.274797
ENSG00000245848	CEBPA	CCAAT/enhancer binding protein (C/EBP), alpha	2.4	17.1	1.1	3.9	0.00301	0	0.273576
ENSG00000165695	AK8	adenylate kinase 8	-2.4	17.1	-4.6	-1.2	0.00301	0	0.272365
ENSG00000110955	ATP5B	ATP synthase, H+ transporting, mitochondrial F1 complex, beta polypeptide	4.6	17.1	2.3	8.9	0.00301	0	0.271165
ENSG00000182481	KPNA2	karyopherin alpha 2 (RAG cohort 1, importin alpha 1)	4.6	17.1	2.5	8.9	0.00301	0	0.269976
ENSG00000165471	MBL2	mannose-binding lectin (protein C) 2, soluble	3.8	17.1	1.6	6.3	0.00301	0	0.268797
ENSG00000105675	ATP4A	ATPase, H+/K+ exchanging, alpha polypeptide	2.1	17.1	1.2	3.9	0.00301	0	0.267628
ENSG00000150316	CWC15	CWC15 spliceosome-associated protein	2.7	17.1	1.3	4.6	0.00301	0	0.26647
ENSG00000178057	NDUFAF3	NADH dehydrogenase (ubiquinone) complex I, assembly factor 3	5.4	17.1	3.2	11.9	0.00301	0	0.265321
ENSG00000268482	AL160274.1	N/A	2.8	17	1.5	4.9	0.00315	0	0.27647
ENSG00000142279	WTIP	Wilms tumor 1 interacting protein	2.1	16.9	1.1	3.5	0.00329	0	0.287524
ENSG00000117000	RLF	rearranged L-myc fusion	-2.5	16.9	-4.6	-1.1	0.00329	0	0.2863
ENSG00000104901	DKKL1	dickkopf-like 1	2.8	16.8	1.4	5.1	0.00343	0	0.297218
ENSG00000108861	DUSP3	dual specificity phosphatase 3	2.6	16.7	1.3	4.5	0.00355	0	0.306319
ENSG00000077312	SNRPA	small nuclear ribonucleoprotein polypeptide A	4.3	16.7	1.7	8.1	0.00355	0	0.305032
ENSG00000122566	HNRNPA2B1	heterogeneous nuclear ribonucleoprotein A2/B1	-3.4	16.7	-7	-1.4	0.00355	0	0.303755
ENSG00000136051	KIAA1033	KIAA1033	3.3	16.7	1.7	6.3	0.00355	0	0.30249
ENSG00000118197	DDX59	DEAD (Asp-Glu-Ala-Asp) box polypeptide 59	3.4	16.7	1.7	6.5	0.00355	0	0.301234
ENSG00000104976	SNAPC2	small nuclear RNA activating complex, polypeptide 2, 45kDa	5.5	16.7	3.3	11.3	0.00355	0	0.29999
ENSG00000124702	KLHDC3	kelch domain containing 3	-2.1	16.6	-4.5	-1.1	0.00369	0	0.310537
ENSG00000113068	PFDN1	prefoldin subunit 1	-2.3	16.5	-4	-1.1	0.00379	0	0.317645
ENSG00000198326	TMEM239	transmembrane protein 239	-2.4	16.5	-4	-1.1	0.00379	0	0.316349
ENSG00000198015	MRPL42	mitochondrial ribosomal protein L42	3.1	16.5	1.6	5.8	0.00379	0	0.315063
ENSG00000041802	LSG1	large 60S subunit nuclear export GTPase 1	5.5	16.5	2.7	10.1	0.00379	0	0.313787
ENSG00000167614	TTYH1	tweety family member 1	2.6	16.5	1.3	4.3	0.00379	0	0.312522
ENSG00000164466	SFXN1	sideroflexin 1	2.2	16.5	1.1	3.5	0.00379	0	0.311267
ENSG00000146469	VIP	vasoactive intestinal peptide	-3.1	16.4	-6.9	-1	0.0039	0	0.31902
ENSG00000204653	ASPDH	aspartate dehydrogenase domain containing	3.2	16.4	1.8	5.8	0.0039	0	0.317749
ENSG00000101997	CCDC22	coiled-coil domain containing 22	2	16.3	1.1	3.7	0.00396	0	0.321357
ENSG00000161847	RAVER1	ribonucleoprotein, PTB-binding 1	-2	16.3	-3.6	-0.9	0.00396	0	0.320087
ENSG00000198535	C2CD4A	C2 calcium-dependent domain containing 4A	2.8	16.3	1.4	4.9	0.00396	0	0.318827
ENSG00000198826	ARHGAP11A	Rho GTPase activating protein 11A	2.6	16.3	1.3	4.4	0.00396	0	0.317576
ENSG00000078674	PCM1	pericentriolar material 1	-2.8	16.3	-5	-1.2	0.00396	0	0.316336
ENSG00000101138	CSTF1	cleavage stimulation factor, 3' pre-RNA, subunit 1, 50kDa	4.8	16.3	2.6	10.1	0.00396	0	0.315105
ENSG00000122674	CCZ1	CCZ1 vacuolar protein trafficking and biogenesis associated homolog (S. cerevisiae)	2.7	16.3	1.5	5.3	0.00396	0	0.313884
ENSG00000043093	DCUN1D1	DCN1, defective in cullin neddylation 1, domain containing 1	1.9	16.2	1	3.2	0.00401	0	0.31662
ENSG00000136986	DERL1	derlin 1	-2.3	16.2	-4.6	-1.1	0.00401	0	0.315402
ENSG00000248098	BCKDHA	branched chain keto acid dehydrogenase E1, alpha polypeptide	2.9	16.2	1.3	5	0.00401	0	0.314193
ENSG00000121297	TSHZ3	teashirt zinc finger homeobox 3	2.6	16.1	1.2	4.6	0.00406	0	0.316897
ENSG00000156970	BUB1B	BUB1 mitotic checkpoint serine/threonine kinase B	3.1	16.1	1.4	6.1	0.00406	0	0.315692
ENSG00000143537	ADAM15	ADAM metallopeptidase domain 15	2.4	16	1.3	4.6	0.0041	0	0.317595
ENSG00000102393	GLA	galactosidase, alpha	2.5	16	1.2	7.5	0.0041	0	0.316396
ENSG00000261739	GOLGA8S	golgin A8 family, member S	2.9	15.9	1.4	5.5	0.00412	0	0.316744
ENSG00000204371	EHMT2	euchromatic histone-lysine N-methyltransferase 2	2.5	15.9	1.2	4.1	0.00412	0	0.315558
ENSG00000169019	COMMD8	COMM domain containing 8	2.4	15.8	1.2	4.3	0.00416	0	0.317433
ENSG00000187048	CYP4A11	cytochrome P450, family 4, subfamily A, polypeptide 11	2.9	15.8	1.5	5.6	0.00416	0	0.316253
ENSG00000156304	SCAF4	SR-related CTD-associated factor 4	3.4	15.8	1.7	6.8	0.00416	0	0.315081
ENSG00000178934	LGALS7B	lectin, galactoside-binding, soluble, 7B	2.1	15.7	1	3.4	0.00419	0	0.316183
ENSG00000113716	HMGXB3	HMG box domain containing 3	-2.2	15.7	-3.9	-1.1	0.00419	0	0.31502
ENSG00000196844	PATE2	prostate and testis expressed 2	2.2	15.6	1.2	3.9	0.00422	0	0.316114
ENSG00000182771	GRID1	glutamate receptor, ionotropic, delta 1	2.3	15.5	1.2	3.9	0.00425	0	0.317199
ENSG00000139842	CUL4A	cullin 4A	-2.6	15.4	-4.8	-1.1	0.00428	0	0.318276
ENSG00000187258	NPSR1	neuropeptide S receptor 1	-2.1	15.4	-3.7	-1	0.00428	0	0.317123
ENSG00000100632	ERH	enhancer of rudimentary homolog (Drosophila)	5.6	15.4	3.7	10.7	0.00428	0	0.315978
ENSG00000089123	TASP1	taspase, threonine aspartase, 1	-2.1	15.3	-3.8	-1.1	0.00432	0	0.317784
ENSG00000233412	OR5H15	olfactory receptor, family 5, subfamily H, member 15	4.1	15.3	2	8.3	0.00432	0	0.316645
ENSG00000269179	CTC-326K19.6	N/A	2.9	15.3	1.1	4.9	0.00432	0	0.315514
ENSG00000129315	CCNT1	cyclin T1	-1.7	15.3	-3.1	-0.8	0.00432	0	0.314391
ENSG00000121774	KHDRBS1	KH domain containing, RNA binding, signal transduction associated 1	1.7	15.3	0.9	3.1	0.00432	0	0.313277
ENSG00000100926	TM9SF1	transmembrane 9 superfamily member 1	-2	15.2	-4	-1	0.00434	0	0.313615
ENSG00000005339	CREBBP	CREB binding protein	1.9	15.2	0.9	3.4	0.00434	0	0.312511
ENSG00000165716	FAM69B	family with sequence similarity 69, member B	4.2	15.2	2.2	8.1	0.00434	0	0.311414
ENSG00000038358	EDC4	enhancer of mRNA decapping 4	-2.3	15.2	-4	-1	0.00434	0	0.310325
ENSG00000123144	C19ORF43	chromosome 19 open reading frame 43	2.1	15.1	1.1	3.8	0.00438	0	0.312094
ENSG00000177992	SPATA31E1	SPATA31 subfamily E, member 1	-2.5	15.1	-4.6	-1.1	0.00438	0	0.31101
ENSG00000173674	EIF1AX	eukaryotic translation initiation factor 1A, X-linked	4.2	15.1	1.8	8.5	0.00438	0	0.309934
ENSG00000272333	KMT2B	lysine (K)-specific methyltransferase 2B	2.2	15.1	1.1	4.4	0.00438	0	0.308866
ENSG00000099617	EFNA2	ephrin-A2	-2.2	15.1	-4.1	-1.1	0.00438	0	0.307804
ENSG00000139910	NOVA1	neuro-oncological ventral antigen 1	2.6	15	1.2	4.5	0.00441	0	0.308851
ENSG00000123374	CDK2	cyclin-dependent kinase 2	2.3	15	1.1	4.2	0.00441	0	0.307797
ENSG00000114742	WDR48	WD repeat domain 48	2.4	15	1.2	4.4	0.00441	0	0.30675
ENSG00000137204	SLC22A7	solute carrier family 22 (organic anion transporter), member 7	3.9	15	1.8	7.5	0.00441	0	0.30571
ENSG00000211956	IGHV4-34	immunoglobulin heavy variable 4-34	2.3	14.9	1.1	4.6	0.00444	0	0.30675
ENSG00000254415	SIGLEC14	sialic acid binding Ig-like lectin 14	2.5	14.9	1.1	4.4	0.00444	0	0.305717
ENSG00000185896	LAMP1	lysosomal-associated membrane protein 1	-1.8	14.9	-3.6	-0.8	0.00444	0	0.304691
ENSG00000184702	2018-09-05	septin 5	-2.8	14.9	-5.2	-1.1	0.00444	0	0.303672
ENSG00000198551	ZNF627	zinc finger protein 627	4.8	14.8	1.7	9.4	0.00447	0	0.304705
ENSG00000152578	GRIA4	glutamate receptor, ionotropic, AMPA 4	-2.4	14.8	-7.9	-0.7	0.00447	0	0.303693
ENSG00000071054	MAP4K4	mitogen-activated protein kinase kinase kinase kinase 4	-2	14.7	-4.2	-1	0.0045	0	0.304719
ENSG00000173559	NABP1	nucleic acid binding protein 1	5.5	14.7	3.1	11.3	0.0045	0	0.303713
ENSG00000139990	DCAF5	DDB1 and CUL4 associated factor 5	-1.9	14.6	-3.7	-0.8	0.00455	0	0.306077
ENSG00000162188	GNG3	guanine nucleotide binding protein (G protein), gamma 3	3.6	14.6	1.8	6.7	0.00455	0	0.305074
ENSG00000225950	NTF4	neurotrophin 4	2.4	14.6	1	6.2	0.00455	0	0.304077
ENSG00000235942	LCE6A	late cornified envelope 6A	2.8	14.6	1.3	4.9	0.00455	0	0.303086
ENSG00000179218	CALR	calreticulin	2.7	14.6	1.2	4.8	0.00455	0	0.302102
ENSG00000182334	OR5P3	olfactory receptor, family 5, subfamily P, member 3	3.6	14.5	1.8	6.1	0.00458	0	0.30311
ENSG00000008130	NADK	NAD kinase	2.8	14.5	1.3	5.4	0.00458	0	0.302132
ENSG00000149716	ORAOV1	oral cancer overexpressed 1	3.1	14.4	1.5	6.4	0.00462	0	0.303791
ENSG00000268614	CTD-2207O23.10	N/A	2.1	14.4	1.1	3.9	0.00462	0	0.302817
ENSG00000163536	SERPINI1	serpin peptidase inhibitor, clade I (neuroserpin), member 1	2.4	14.4	1.1	5.2	0.00462	0	0.30185
ENSG00000119401	TRIM32	tripartite motif containing 32	2.6	14.4	1	5.4	0.00462	0	0.300889
ENSG00000174915	PTDSS2	phosphatidylserine synthase 2	5.2	14.4	1.7	10.1	0.00462	0	0.299933
ENSG00000197933	ZNF823	zinc finger protein 823	2.8	14.3	1.3	5.2	0.00466	0	0.301573
ENSG00000206181	TCEB3B	transcription elongation factor B polypeptide 3B (elongin A2)	5.7	14.3	2.7	11.7	0.00466	0	0.300621
ENSG00000081913	PHLPP1	PH domain and leucine rich repeat protein phosphatase 1	2.7	14.3	1.4	4.6	0.00466	0	0.299676
ENSG00000105507	CABP5	calcium binding protein 5	2.9	14.3	1.4	4.7	0.00466	0	0.298737
ENSG00000086730	LAT2	linker for activation of T cells family, member 2	3.5	14.3	1.4	6.4	0.00466	0	0.297803
ENSG00000104974	LILRA1	leukocyte immunoglobulin-like receptor, subfamily A (with TM domain), member 1	2.4	14.3	0.9	5.1	0.00466	0	0.296875
ENSG00000067208	EVI5	ecotropic viral integration site 5	-1.8	14.3	-3.7	-0.9	0.00466	0	0.295953
ENSG00000175376	EIF1AD	eukaryotic translation initiation factor 1A domain containing	5.8	14.3	3.7	11.4	0.00466	0	0.295037
ENSG00000177558	FAM187B	family with sequence similarity 187, member B	1.9	14.3	0.9	3.3	0.00466	0	0.294127
ENSG00000198624	CCDC69	coiled-coil domain containing 69	3.4	14.2	1.5	7	0.0047	0	0.295738
ENSG00000149925	ALDOA	aldolase A, fructose-bisphosphate	3.1	14.2	1.4	6.2	0.0047	0	0.294831
ENSG00000116478	HDAC1	histone deacetylase 1	1.8	14.2	0.9	3.4	0.0047	0	0.29393
ENSG00000170312	CDK1	cyclin-dependent kinase 1	3.2	14.2	1.3	6.6	0.0047	0	0.293034
ENSG00000185028	LRRC14B	leucine rich repeat containing 14B	4.6	14.1	2.4	8.5	0.00474	0	0.294629
ENSG00000147548	WHSC1L1	Wolf-Hirschhorn syndrome candidate 1-like 1	-2.6	14.1	-5.1	-1	0.00474	0	0.293736
ENSG00000120802	TMPO	thymopoietin	-2.5	14.1	-4.8	-1	0.00474	0	0.292849
ENSG00000076662	ICAM3	intercellular adhesion molecule 3	3	14.1	1.4	5.6	0.00474	0	0.291967
ENSG00000197153	HIST1H3J	histone cluster 1, H3j	4.2	14	1.4	7.8	0.00478	0	0.293547
ENSG00000116688	MFN2	mitofusin 2	3.9	14	1.8	7.8	0.00478	0	0.292668
ENSG00000153207	AHCTF1	AT hook containing transcription factor 1	-2.3	13.9	-4.4	-1.1	0.00482	0	0.294236
ENSG00000099949	LZTR1	leucine-zipper-like transcription regulator 1	-2.3	13.9	-4.5	-1	0.00482	0	0.29336
ENSG00000100105	PATZ1	POZ (BTB) and AT hook containing zinc finger 1	2.8	13.9	1.2	5	0.00482	0	0.29249
ENSG00000100387	RBX1	ring-box 1, E3 ubiquitin protein ligase	-3	13.9	-6.3	-1.3	0.00482	0	0.291624
ENSG00000260027	HOXB7	homeobox B7	4	13.9	1.7	6.9	0.00482	0	0.290764
ENSG00000172575	RASGRP1	RAS guanyl releasing protein 1 (calcium and DAG-regulated)	-2.1	13.9	-3.7	-0.9	0.00482	0	0.289909
ENSG00000204178	TMEM57	transmembrane protein 57	-2.2	13.9	-4.1	-0.9	0.00482	0	0.289059
ENSG00000112659	CUL9	cullin 9	-2.5	13.8	-4.8	-1	0.00487	0	0.291203
ENSG00000204363	SPANXN5	SPANX family, member N5	2.7	13.8	1.3	5.3	0.00487	0	0.290354
ENSG00000164815	ORC5	origin recognition complex, subunit 5	3.5	13.8	1.4	6.6	0.00487	0	0.28951
ENSG00000187866	FAM122A	family with sequence similarity 122A	2.6	13.8	0.9	5.9	0.00487	0	0.288671
ENSG00000203730	TEDDM1	transmembrane epididymal protein 1	2.4	13.8	1.1	4.4	0.00487	0	0.287837
ENSG00000165118	C9ORF64	chromosome 9 open reading frame 64	4.9	13.8	1.1	10.4	0.00487	0	0.287007
ENSG00000188223	AC002398.9	N/A	2	13.7	0.9	3.4	0.00491	0	0.288533
ENSG00000176087	SLC35A4	solute carrier family 35, member A4	-2.4	13.7	-4.9	-0.9	0.00491	0	0.287706
ENSG00000225830	ERCC6	excision repair cross-complementation group 6	-2.9	13.6	-6.4	-1.1	0.00495	0	0.289221
ENSG00000035681	NSMAF	neutral sphingomyelinase (N-SMase) activation associated factor	2.1	13.6	1	3.8	0.00495	0	0.288397
ENSG00000203902	PNMA6B	paraneoplastic Ma antigen family member 6B (pseudogene)	3.1	13.6	1.3	6.6	0.00495	0	0.287578
ENSG00000089248	ERP29	endoplasmic reticulum protein 29	2.3	13.6	1.1	4.4	0.00495	0	0.286763
ENSG00000205795	CYS1	cystin 1	2.4	13.6	1.1	4.4	0.00495	0	0.285953
ENSG00000124214	STAU1	staufen double-stranded RNA binding protein 1	-2	13.5	-3.6	-0.9	0.005	0	0.288028
ENSG00000076928	ARHGEF1	Rho guanine nucleotide exchange factor (GEF) 1	2.1	13.5	0.9	3.7	0.005	0	0.287219
ENSG00000196532	HIST1H3C	histone cluster 1, H3c	3.9	13.5	2.2	8.1	0.005	0	0.286415
ENSG00000213079	SCAF8	SR-related CTD-associated factor 8	-2.2	13.5	-4.1	-0.9	0.005	0	0.285615
ENSG00000130881	LRP3	low density lipoprotein receptor-related protein 3	1.9	13.4	0.8	3.4	0.00505	0	0.287667
ENSG00000101230	ISM1	isthmin 1, angiogenesis inhibitor	5.9	13.4	3.8	11.5	0.00505	0	0.286868
ENSG00000229676	ZNF492	zinc finger protein 492	-1.9	13.4	-3.8	-0.8	0.00505	0	0.286073
ENSG00000105287	PRKD2	protein kinase D2	1.7	13.4	0.8	3	0.00505	0	0.285283
ENSG00000148795	CYP17A1	cytochrome P450, family 17, subfamily A, polypeptide 1	4.4	13.4	1.4	8.3	0.00505	0	0.284497
ENSG00000167359	OR51I1	olfactory receptor, family 51, subfamily I, member 1	3.2	13.4	1.7	6	0.00505	0	0.283716
ENSG00000171862	PTEN	phosphatase and tensin homolog	-2.2	13.4	-7	4.1	0.00505	0	0.282938
ENSG00000255394	C8ORF49	chromosome 8 open reading frame 49	3.6	13.3	1.8	6.4	0.0051	0	0.284959
ENSG00000121381	TAS2R9	taste receptor, type 2, member 9	-1.9	13.3	-3.7	-0.9	0.0051	0	0.284183
ENSG00000166398	KIAA0355	KIAA0355	1.9	13.2	0.9	3.8	0.00514	0	0.285633
ENSG00000248369	RP11-62N21.1	N/A	-2.2	13.2	-4.3	-0.9	0.00514	0	0.284859
ENSG00000166508	MCM7	minichromosome maintenance complex component 7	5.8	13.2	3.9	11.8	0.00514	0	0.284089
ENSG00000117751	PPP1R8	protein phosphatase 1, regulatory subunit 8	4.7	13.2	1.9	8.7	0.00514	0	0.283323
ENSG00000170866	LILRA3	leukocyte immunoglobulin-like receptor, subfamily A (without TM domain), member 3	5.4	13.2	2.4	10	0.00514	0	0.282562
ENSG00000110169	HPX	hemopexin	3.3	13.2	1.7	5.9	0.00514	0	0.281804
ENSG00000112081	SRSF3	serine/arginine-rich splicing factor 3	5.2	13.1	3.4	11.5	0.0052	0	0.284332
ENSG00000179915	NRXN1	neurexin 1	4	13.1	1.6	7.1	0.0052	0	0.283573
ENSG00000158092	NCK1	NCK adaptor protein 1	2.2	13.1	1	3.9	0.0052	0	0.282819
ENSG00000066117	SMARCD1	SWI/SNF related, matrix associated, actin dependent regulator of chromatin, subfamily d, member 1	-2.1	13.1	-4	-0.9	0.0052	0	0.282069
ENSG00000174197	MGA	MGA, MAX dimerization protein	-1.8	13.1	-3.6	-0.8	0.0052	0	0.281323
ENSG00000269469	CTD-3148I10.9	N/A	2.7	13	1.2	4.5	0.00525	0	0.283278
ENSG00000141012	GALNS	galactosamine (N-acetyl)-6-sulfatase	-2.3	13	-4.3	-0.8	0.00525	0	0.282533
ENSG00000123415	SMUG1	single-strand-selective monofunctional uracil-DNA glycosylase 1	-2.2	13	-4.2	-0.9	0.00525	0	0.281791
ENSG00000223802	CERS1	ceramide synthase 1	3.2	13	1.2	7.2	0.00525	0	0.281054
ENSG00000137497	NUMA1	nuclear mitotic apparatus protein 1	2.6	12.9	1	4.8	0.0053	0	0.28299
ENSG00000183891	TTC32	tetratricopeptide repeat domain 32	3	12.9	1.3	6	0.0053	0	0.282253
ENSG00000114744	COMMD2	COMM domain containing 2	3.2	12.9	1.3	7.8	0.0053	0	0.281519
ENSG00000111652	COPS7A	COP9 signalosome subunit 7A	-2.2	12.9	-4.4	-0.8	0.0053	0	0.28079
ENSG00000133678	TMEM254	transmembrane protein 254	2.5	12.9	0.9	5.1	0.0053	0	0.280065
ENSG00000101639	CEP192	centrosomal protein 192kDa	3.3	12.9	1.3	6.2	0.0053	0	0.279343
ENSG00000142512	SIGLEC10	sialic acid binding Ig-like lectin 10	3.5	12.9	1.5	7.2	0.0053	0	0.278625
ENSG00000267631	CGB1	chorionic gonadotropin, beta polypeptide 1	4.3	12.9	2.1	10	0.0053	0	0.27791
ENSG00000164252	AGGF1	angiogenic factor with G patch and FHA domains 1	2.7	12.8	1	5	0.00538	0	0.281384
ENSG00000079215	SLC1A3	solute carrier family 1 (glial high affinity glutamate transporter), member 3	2.9	12.8	1.2	6.9	0.00538	0	0.280666
ENSG00000180438	TPRXL	tetra-peptide repeat homeobox-like	2.5	12.8	1.1	4.4	0.00538	0	0.279952
ENSG00000101367	MAPRE1	microtubule-associated protein, RP/EB family, member 1	2.2	12.8	0.9	4.1	0.00538	0	0.279241
ENSG00000179774	ATOH7	atonal homolog 7 (Drosophila)	-2	12.8	-3.6	-0.8	0.00538	0	0.278534
ENSG00000198848	CES1	carboxylesterase 1	-2.4	12.8	-5	-1	0.00538	0	0.277831
ENSG00000042088	TDP1	tyrosyl-DNA phosphodiesterase 1	5.2	12.7	2.5	10.5	0.00543	0	0.279707
ENSG00000139624	CERS5	ceramide synthase 5	-2.2	12.7	-4.4	-0.9	0.00543	0	0.279004
ENSG00000159082	SYNJ1	synaptojanin 1	-1.7	12.7	-3.2	-0.7	0.00543	0	0.278305
ENSG00000162702	ZNF281	zinc finger protein 281	-1.9	12.7	-3.6	-0.8	0.00543	0	0.277609
ENSG00000139998	RAB15	RAB15, member RAS oncogene family	3.4	12.6	1.3	6.2	0.00548	0	0.279466
ENSG00000156976	EIF4A2	eukaryotic translation initiation factor 4A2	-1.7	12.6	-3.2	-0.7	0.00548	0	0.278771
ENSG00000198498	TMA16	translation machinery associated 16 homolog (S. cerevisiae)	3.4	12.6	1.5	5.9	0.00548	0	0.278079
ENSG00000106113	CRHR2	corticotropin releasing hormone receptor 2	-2.1	12.6	-4	-0.8	0.00548	0	0.277391
ENSG00000104870	FCGRT	Fc fragment of IgG, receptor, transporter, alpha	2.6	12.6	1	4.6	0.00548	0	0.276706
ENSG00000182923	CEP63	centrosomal protein 63kDa	3.2	12.6	1.2	6.4	0.00548	0	0.276025
ENSG00000152034	MCHR2	melanin-concentrating hormone receptor 2	3.6	12.6	1.7	7	0.00548	0	0.275346
ENSG00000124215	CDH26	cadherin 26	4.5	12.6	1.7	9.6	0.00548	0	0.274672
ENSG00000214021	TTLL3	tubulin tyrosine ligase-like family, member 3	3	12.6	1.4	6.3	0.00548	0	0.274
ENSG00000134853	PDGFRA	platelet-derived growth factor receptor, alpha polypeptide	4.2	12.5	1.5	8.2	0.00554	0	0.276324
ENSG00000167967	E4F1	E4F transcription factor 1	-2.3	12.5	-4.3	-1	0.00554	0	0.275652
ENSG00000105711	SCN1B	sodium channel, voltage-gated, type I, beta subunit	1.8	12.5	0.8	3.6	0.00554	0	0.274983
ENSG00000197748	WDR96	N/A	3	12.4	1	5.6	0.0056	0	0.277288
ENSG00000137098	SPAG8	sperm associated antigen 8	4.3	12.4	1.4	8.6	0.0056	0	0.276618
ENSG00000177542	SLC25A22	solute carrier family 25 (mitochondrial carrier: glutamate), member 22	2.8	12.4	1.2	5.3	0.0056	0	0.275952
ENSG00000166510	CCDC68	coiled-coil domain containing 68	2.8	12.4	1.2	5	0.0056	0	0.275288
ENSG00000146701	MDH2	malate dehydrogenase 2, NAD (mitochondrial)	-1.6	12.4	-3.1	-0.7	0.0056	0	0.274628
ENSG00000187902	SHISA7	shisa family member 7	2	12.4	0.9	3.9	0.0056	0	0.273971
ENSG00000009709	PAX7	paired box 7	-2.8	12.4	-5.6	-1	0.0056	0	0.273317
ENSG00000197157	SND1	staphylococcal nuclease and tudor domain containing 1	3.7	12.3	1.1	7.4	0.00566	0	0.275588
ENSG00000131051	RBM39	RNA binding motif protein 39	3.2	12.3	1.3	6.6	0.00566	0	0.274933
ENSG00000005073	HOXA11	homeobox A11	-2.6	12.3	-5.7	-0.9	0.00566	0	0.274282
ENSG00000196437	ZNF569	zinc finger protein 569	2.2	12.3	1	4	0.00566	0	0.273634
ENSG00000126259	KIRREL2	kin of IRRE like 2 (Drosophila)	1.7	12.3	0.8	3.4	0.00566	0	0.272988
ENSG00000259164	RP11-463C8.4	N/A	-2.3	12.3	-4.7	-0.8	0.00566	0	0.272346
ENSG00000103222	ABCC1	ATP-binding cassette, sub-family C (CFTR/MRP), member 1	-2.2	12.3	-4	-0.8	0.00566	0	0.271707
ENSG00000069329	VPS35	vacuolar protein sorting 35 homolog (S. cerevisiae)	2	12.3	0.9	4.1	0.00566	0	0.27107
ENSG00000137218	FRS3	fibroblast growth factor receptor substrate 3	2.2	12.3	1	4	0.00566	0	0.270437
ENSG00000071127	WDR1	WD repeat domain 1	2.4	12.3	1.1	4.3	0.00566	0	0.269807
ENSG00000078403	MLLT10	myeloid/lymphoid or mixed-lineage leukemia (trithorax homolog, Drosophila); translocated to, 10	1.8	12.2	0.8	3.4	0.00572	0	0.272033
ENSG00000164933	SLC25A32	solute carrier family 25 (mitochondrial folate carrier), member 32	1.8	12.2	0.8	3.2	0.00572	0	0.271401
ENSG00000221968	FADS3	fatty acid desaturase 3	3	12.2	1.3	5.8	0.00572	0	0.270773
ENSG00000162804	SNED1	sushi, nidogen and EGF-like domains 1	-2.3	12.2	-4.3	-0.9	0.00572	0	0.270148
ENSG00000186326	RGS9BP	regulator of G protein signaling 9 binding protein	1.9	12.2	0.7	3.6	0.00572	0	0.269525
ENSG00000268279	RP11-434D12.1	N/A	3.4	12.2	1.5	6.2	0.00572	0	0.268906
ENSG00000221957	KIR2DS4	killer cell immunoglobulin-like receptor, two domains, short cytoplasmic tail, 4	3	12.2	1.2	6	0.00572	0	0.268289
ENSG00000211945	IGHV1-18	immunoglobulin heavy variable 1-18	-2.4	12.2	-4.7	-0.9	0.00572	0	0.267675
ENSG00000163221	S100A12	S100 calcium binding protein A12	2.9	12.2	1	6.9	0.00572	0	0.267064
ENSG00000261915	RP11-542C16.2	N/A	3.3	12.2	1.3	8.1	0.00572	0	0.266456
ENSG00000165030	NFIL3	nuclear factor, interleukin 3 regulated	3	12.1	1.3	6	0.00579	0	0.269103
ENSG00000082213	C5ORF22	chromosome 5 open reading frame 22	-2.2	12.1	-4.1	-0.8	0.00579	0	0.268493
ENSG00000178028	DMAP1	DNA methyltransferase 1 associated protein 1	2.5	12.1	1.3	5.1	0.00579	0	0.267886
ENSG00000145331	TRMT10A	tRNA methyltransferase 10 homolog A (S. cerevisiae)	-1.9	12.1	-3.6	-0.8	0.00579	0	0.267281
ENSG00000112118	MCM3	minichromosome maintenance complex component 3	3.8	12	1.6	8.5	0.00586	0	0.269903
ENSG00000089154	GCN1L1	GCN1 general control of amino-acid synthesis 1-like 1 (yeast)	2.2	12	0.8	4.3	0.00586	0	0.269297
ENSG00000145384	FABP2	fatty acid binding protein 2, intestinal	-2.6	12	-6.6	-0.9	0.00586	0	0.268693
ENSG00000105821	DNAJC2	DnaJ (Hsp40) homolog, subfamily C, member 2	2	12	0.8	3.8	0.00586	0	0.268092
ENSG00000113273	ARSB	arylsulfatase B	-2	12	-3.9	-0.7	0.00586	0	0.267493
ENSG00000140519	RHCG	Rh family, C glycoprotein	2.6	11.9	1	4.8	0.00593	0	0.270086
ENSG00000107371	EXOSC3	exosome component 3	4	11.9	1.6	7.6	0.00593	0	0.269486
ENSG00000170608	FOXA3	forkhead box A3	2.2	11.9	0.9	4.3	0.00593	0	0.268888
ENSG00000172795	DCP2	decapping mRNA 2	-2.1	11.9	-4.1	-0.8	0.00593	0	0.268293
ENSG00000168000	BSCL2	Berardinelli-Seip congenital lipodystrophy 2 (seipin)	-1.9	11.9	-3.8	-0.8	0.00593	0	0.267701
ENSG00000182372	CLN8	ceroid-lipofuscinosis, neuronal 8 (epilepsy, progressive with mental retardation)	2.6	11.9	0.9	4.9	0.00593	0	0.267111
ENSG00000162959	MEMO1	mediator of cell motility 1	-2.1	11.9	-4.4	-0.9	0.00593	0	0.266524
ENSG00000271043	MTRNR2L2	MT-RNR2-like 2	4.3	11.9	2.8	8	0.00593	0	0.26594
ENSG00000090920	FCGBP	Fc fragment of IgG binding protein	2.4	11.8	0.9	4.5	0.00601	0	0.268938
ENSG00000148335	NTMT1	N-terminal Xaa-Pro-Lys N-methyltransferase 1	4.6	11.8	1.6	9.2	0.00601	0	0.26835
ENSG00000145332	KLHL8	kelch-like family member 8	-3.6	11.8	-8.1	-1.4	0.00601	0	0.267766
ENSG00000166866	MYO1A	myosin IA	2.1	11.8	0.7	5.7	0.00601	0	0.267184
ENSG00000196381	ZNF781	zinc finger protein 781	4.5	11.8	1.5	9.2	0.00601	0	0.266604
ENSG00000025796	SEC63	SEC63 homolog (S. cerevisiae)	3.6	11.8	1	7.3	0.00601	0	0.266027
ENSG00000126822	PLEKHG3	pleckstrin homology domain containing, family G (with RhoGef domain) member 3	2.4	11.8	0.9	4.4	0.00601	0	0.265452
ENSG00000020426	MNAT1	MNAT CDK-activating kinase assembly factor 1	-1.9	11.8	-3.6	-0.7	0.00601	0	0.26488
ENSG00000146574	CCZ1B	CCZ1 vacuolar protein trafficking and biogenesis associated homolog B (S. cerevisiae)	2.5	11.8	1.1	4.7	0.00601	0	0.264311
ENSG00000122140	MRPS2	mitochondrial ribosomal protein S2	3.6	11.8	1.4	7.6	0.00601	0	0.263744
ENSG00000231068	KRTAP21-3	keratin associated protein 21-3	3.5	11.8	1.3	7.4	0.00601	0	0.263179
ENSG00000115234	SNX17	sorting nexin 17	2.6	11.8	1.1	5.6	0.00601	0	0.262616
ENSG00000146828	SLC12A9	solute carrier family 12, member 9	-3.2	11.8	-6	-1.3	0.00601	0	0.262057
ENSG00000125845	BMP2	bone morphogenetic protein 2	1.9	11.7	0.8	3.5	0.00609	0	0.26498
ENSG00000165807	PPP1R36	protein phosphatase 1, regulatory subunit 36	2.1	11.7	0.9	3.7	0.00609	0	0.264417
ENSG00000198944	SOWAHA	sosondowah ankyrin repeat domain family member A	2.6	11.7	1.1	4.8	0.00609	0	0.263857
ENSG00000248672	LY75-CD302	LY75-CD302 readthrough	5.2	11.7	2.2	10.1	0.00609	0	0.263299
ENSG00000088986	DYNLL1	dynein, light chain, LC8-type 1	3.5	11.7	1	6.5	0.00609	0	0.262744
ENSG00000183598	HIST2H3D	histone cluster 2, H3d	3.1	11.7	1.2	8	0.00609	0	0.262191
ENSG00000171206	TRIM8	tripartite motif containing 8	2.1	11.6	0.8	3.9	0.00616	0	0.264647
ENSG00000127824	TUBA4A	tubulin, alpha 4a	-2.4	11.6	-5	-0.8	0.00616	0	0.264092
ENSG00000003756	RBM5	RNA binding motif protein 5	1.9	11.6	0.8	4	0.00616	0	0.26354
ENSG00000072864	NDE1	nudE neurodevelopment protein 1	-1.9	11.6	-4.4	-0.8	0.00616	0	0.26299
ENSG00000196862	RGPD4	RANBP2-like and GRIP domain containing 4	2.8	11.6	0.9	6.3	0.00616	0	0.262442
ENSG00000064313	TAF2	TAF2 RNA polymerase II, TATA box binding protein (TBP)-associated factor, 150kDa	5.3	11.6	2.9	11.3	0.00616	0	0.261896
ENSG00000134882	UBAC2	UBA domain containing 2	2.4	11.6	1	5.5	0.00616	0	0.261353
ENSG00000161920	MED11	mediator complex subunit 11	3	11.6	1.1	5.8	0.00616	0	0.260812
ENSG00000179046	TRIML2	tripartite motif family-like 2	2.3	11.6	1	4.7	0.00616	0	0.260273
ENSG00000180815	MAP3K15	mitogen-activated protein kinase kinase kinase 15	3.1	11.5	1.1	6.5	0.00625	0	0.263531
ENSG00000148444	COMMD3	COMM domain containing 3	3.1	11.5	1.6	6.6	0.00625	0	0.262989
ENSG00000103381	CPPED1	calcineurin-like phosphoesterase domain containing 1	4.1	11.5	1.2	8.3	0.00625	0	0.262449
ENSG00000244355	LY6G6D	lymphocyte antigen 6 complex, locus G6D	-1.9	11.5	-4	-0.7	0.00625	0	0.261911
ENSG00000175155	YPEL2	yippee-like 2 (Drosophila)	2.5	11.5	1.1	6.1	0.00625	0	0.261375
ENSG00000123329	ARHGAP9	Rho GTPase activating protein 9	2.9	11.5	1.2	5.5	0.00625	0	0.260842
ENSG00000136830	FAM129B	family with sequence similarity 129, member B	3.1	11.5	1.1	6	0.00625	0	0.260311
ENSG00000198374	HIST1H2AL	histone cluster 1, H2al	2.6	11.4	1	5.5	0.00635	0	0.263938
ENSG00000267114	CTB-129P6.11	N/A	2.1	11.4	0.8	3.7	0.00635	0	0.263403
ENSG00000137675	MMP27	matrix metallopeptidase 27	2.6	11.4	1	4.9	0.00635	0	0.262869
ENSG00000137100	DCTN3	dynactin 3 (p22)	-2.6	11.4	-5.4	-1	0.00635	0	0.262338
ENSG00000125877	ITPA	inosine triphosphatase (nucleoside triphosphate pyrophosphatase)	2.8	11.4	1.1	5.6	0.00635	0	0.261809
ENSG00000165757	KIAA1462	KIAA1462	3.1	11.4	1.3	6.7	0.00635	0	0.261283
ENSG00000183092	BEGAIN	brain-enriched guanylate kinase-associated	-1.8	11.4	-3.5	-0.7	0.00635	0	0.260758
ENSG00000159905	ZNF221	zinc finger protein 221	3.5	11.4	1.2	7.1	0.00635	0	0.260235
ENSG00000267757	C19ORF83	chromosome 19 open reading frame 83	2.8	11.3	1	5.7	0.00644	0	0.263396
ENSG00000145982	FARS2	phenylalanyl-tRNA synthetase 2, mitochondrial	3.7	11.3	1.4	7.6	0.00644	0	0.26287
ENSG00000177045	SIX5	SIX homeobox 5	3.6	11.3	0.8	9.7	0.00644	0	0.262347
ENSG00000153147	SMARCA5	SWI/SNF related, matrix associated, actin dependent regulator of chromatin, subfamily a, member 5	2.9	11.3	1.1	5.4	0.00644	0	0.261825
ENSG00000007216	SLC13A2	solute carrier family 13 (sodium-dependent dicarboxylate transporter), member 2	-2.2	11.3	-4.4	-0.8	0.00644	0	0.261306
ENSG00000182183	FAM159A	family with sequence similarity 159, member A	-1.7	11.3	-3.3	-0.7	0.00644	0	0.260788
ENSG00000171566	PLRG1	pleiotropic regulator 1	3.3	11.3	1.3	6	0.00644	0	0.260273
ENSG00000100596	SPTLC2	serine palmitoyltransferase, long chain base subunit 2	2.6	11.3	0.9	4.9	0.00644	0	0.259759
ENSG00000153944	MSI2	musashi RNA-binding protein 2	-2.2	11.3	-4.4	-0.8	0.00644	0	0.259248
ENSG00000147509	RGS20	regulator of G-protein signaling 20	-1.7	11.3	-4.9	-0.6	0.00644	0	0.258739
ENSG00000080824	HSP90AA1	heat shock protein 90kDa alpha (cytosolic), class A member 1	-2.4	11.2	-4.7	-0.7	0.00653	0	0.26184
ENSG00000150977	RILPL2	Rab interacting lysosomal protein-like 2	-2.2	11.2	-4.1	-0.7	0.00653	0	0.261328
ENSG00000142676	RPL11	ribosomal protein L11	2.9	11.2	1.2	6.3	0.00653	0	0.260817
ENSG00000119041	GTF3C3	general transcription factor IIIC, polypeptide 3, 102kDa	5.3	11.2	2.9	10.6	0.00653	0	0.260309
ENSG00000256861	RP11-512M8.5	N/A	-2.1	11.2	-4.2	-0.7	0.00653	0	0.259803
ENSG00000132793	LPIN3	lipin 3	5.6	11.2	3.3	10.7	0.00653	0	0.259298
ENSG00000234409	AC006547.14	N/A	3.9	11.2	1.5	8.8	0.00653	0	0.258796
ENSG00000134900	TPP2	tripeptidyl peptidase II	1.8	11.1	0.6	3.5	0.00662	0	0.261855
ENSG00000135473	PAN2	PAN2 poly(A) specific ribonuclease subunit	1.9	11.1	0.8	3.9	0.00662	0	0.261349
ENSG00000197299	BLM	Bloom syndrome, RecQ helicase-like	-2.2	11.1	-4.4	-0.7	0.00662	0	0.260846
ENSG00000020256	ZFP64	ZFP64 zinc finger protein	1.7	11.1	0.7	3.2	0.00662	0	0.260344
ENSG00000259288	RP11-133K1.2	N/A	3.3	11.1	1.5	7.5	0.00662	0	0.259845
ENSG00000189079	ARID2	AT rich interactive domain 2 (ARID, RFX-like)	1.8	11	0.7	3.5	0.00671	0	0.262873
ENSG00000166352	C11ORF74	chromosome 11 open reading frame 74	3.9	11	1.2	8	0.00671	0	0.26237
ENSG00000239511	POM121L7	POM121 transmembrane nucleoporin-like 7	2.8	11	1.2	5.2	0.00671	0	0.261869
ENSG00000136237	RAPGEF5	Rap guanine nucleotide exchange factor (GEF) 5	4.4	11	2	8.8	0.00671	0	0.26137
ENSG00000105707	HPN	hepsin	2.3	11	0.9	4.3	0.00671	0	0.260874
ENSG00000197852	FAM212B	family with sequence similarity 212, member B	3.4	11	1.4	6.9	0.00671	0	0.260379
ENSG00000129173	E2F8	E2F transcription factor 8	1.7	11	0.6	3.4	0.00671	0	0.259885
ENSG00000142065	ZFP14	ZFP14 zinc finger protein	2	11	0.8	4.2	0.00671	0	0.259394
ENSG00000197619	ZNF615	zinc finger protein 615	3.7	11	1.3	7.5	0.00671	0	0.258905
ENSG00000272162	RP11-637O19.3	N/A	-2.5	11	-5.7	-1.4	0.00671	0	0.258417
ENSG00000125779	PANK2	pantothenate kinase 2	2.3	11	0.9	4.5	0.00671	0	0.257931
ENSG00000231256	C17ORF105	chromosome 17 open reading frame 105	3.6	11	0.9	7	0.00671	0	0.257447
ENSG00000113649	TCERG1	transcription elongation regulator 1	2	11	0.8	3.9	0.00671	0	0.256965
ENSG00000164330	EBF1	early B-cell factor 1	-2.3	11	-5.7	-0.7	0.00671	0	0.256485
ENSG00000168395	ING5	inhibitor of growth family, member 5	2	10.9	0.7	4.1	0.00683	0	0.260585
ENSG00000124784	RIOK1	RIO kinase 1	-1.6	10.9	-3.3	-0.6	0.00683	0	0.2601
ENSG00000011422	PLAUR	plasminogen activator, urokinase receptor	2.7	10.9	0.8	5.2	0.00683	0	0.259616
ENSG00000162643	WDR63	WD repeat domain 63	3.8	10.9	1.3	7.7	0.00683	0	0.259135
ENSG00000198382	UVRAG	UV radiation resistance associated	-1.7	10.9	-3.3	-0.7	0.00683	0	0.258655
ENSG00000179468	OR9A2	olfactory receptor, family 9, subfamily A, member 2	-1.6	10.9	-3	-0.6	0.00683	0	0.258177
ENSG00000119446	RBM18	RNA binding motif protein 18	-2.3	10.9	-4.4	-0.8	0.00683	0	0.2577
ENSG00000198492	YTHDF2	YTH domain family, member 2	-2.1	10.8	-5.6	-0.8	0.00693	0	0.260992
ENSG00000159217	IGF2BP1	insulin-like growth factor 2 mRNA binding protein 1	-2.2	10.8	-4.4	-0.7	0.00693	0	0.260512
ENSG00000186827	TNFRSF4	tumor necrosis factor receptor superfamily, member 4	2.9	10.8	1	5.7	0.00693	0	0.260034
ENSG00000107959	PITRM1	pitrilysin metallopeptidase 1	-1.8	10.8	-3.5	-0.6	0.00693	0	0.259558
ENSG00000175482	POLD4	polymerase (DNA-directed), delta 4, accessory subunit	-2.9	10.8	-6.6	-1	0.00693	0	0.259083
ENSG00000114354	TFG	TRK-fused gene	-2.1	10.8	-4.6	-0.7	0.00693	0	0.25861
ENSG00000130529	TRPM4	transient receptor potential cation channel, subfamily M, member 4	1.8	10.8	0.6	3.3	0.00693	0	0.258139
ENSG00000185313	SCN10A	sodium channel, voltage-gated, type X, alpha subunit	2.6	10.8	1	4.9	0.00693	0	0.25767
ENSG00000163939	PBRM1	polybromo 1	1.8	10.8	0.7	3.9	0.00693	0	0.257202
ENSG00000140632	GLYR1	glyoxylate reductase 1 homolog (Arabidopsis)	-1.9	10.7	-3.7	-0.7	0.00704	0	0.260812
ENSG00000119953	SMNDC1	survival motor neuron domain containing 1	-1.7	10.7	-3.4	-0.6	0.00704	0	0.26034
ENSG00000126746	ZNF384	zinc finger protein 384	-1.8	10.7	-3.8	-0.6	0.00704	0	0.25987
ENSG00000268341	L47234.1	N/A	3.9	10.7	1.3	8.4	0.00704	0	0.259402
ENSG00000141510	TP53	tumor protein p53	-1.9	10.7	-3.9	-0.7	0.00704	0	0.258935
ENSG00000102189	EEA1	early endosome antigen 1	3.2	10.7	-3.4	9	0.00704	0	0.25847
ENSG00000147862	NFIB	nuclear factor I/B	4.8	10.7	2.2	9.6	0.00704	0	0.258007
ENSG00000128714	HOXD13	homeobox D13	2.4	10.7	1	5.4	0.00704	0	0.257546
ENSG00000211450	C11ORF31	chromosome 11 open reading frame 31	1.8	10.7	0.8	3.8	0.00704	0	0.257086
ENSG00000112902	SEMA5A	sema domain, seven thrombospondin repeats (type 1 and type 1-like), transmembrane domain (TM) and short cytoplasmic domain, (semaphorin) 5A	2.4	10.7	0.4	6.1	0.00704	0	0.256627
ENSG00000114648	KLHL18	kelch-like family member 18	4.2	10.7	1.8	8.6	0.00704	0	0.256171
ENSG00000055130	CUL1	cullin 1	1.6	10.7	0.6	3.4	0.00704	0	0.255716
ENSG00000215405	GOLGA6L6	golgin A6 family-like 6	4.5	10.7	1.8	10	0.00704	0	0.255262
ENSG00000048540	LMO3	LIM domain only 3 (rhombotin-like 2)	2.9	10.6	0.8	5.8	0.00715	0	0.258792
ENSG00000156885	COX6A2	cytochrome c oxidase subunit VIa polypeptide 2	2.1	10.6	0.8	4	0.00715	0	0.258335
ENSG00000162621	LRRC53	leucine rich repeat containing 53	3.6	10.6	1.4	7.1	0.00715	0	0.257879
ENSG00000214844	AC007952.1	N/A	2.1	10.5	0.9	4.2	0.00727	0	0.261746
ENSG00000136895	GARNL3	GTPase activating Rap/RanGAP domain-like 3	4.3	10.5	2	9.5	0.00727	0	0.261286
ENSG00000125861	GFRA4	GDNF family receptor alpha 4	3.8	10.5	1.3	8.1	0.00727	0	0.260827
ENSG00000158793	NIT1	nitrilase 1	4.5	10.5	1.3	9.1	0.00727	0	0.26037
ENSG00000126709	IFI6	interferon, alpha-inducible protein 6	2.5	10.5	0.9	4.7	0.00727	0	0.259915
ENSG00000135709	KIAA0513	KIAA0513	3.6	10.5	1.1	8.2	0.00727	0	0.259462
ENSG00000197816	CCDC180	coiled-coil domain containing 180	-2.1	10.5	-4.2	-0.7	0.00727	0	0.25901
ENSG00000141968	VAV1	vav 1 guanine nucleotide exchange factor	2.1	10.5	0.8	4.9	0.00727	0	0.258559
ENSG00000173809	TDRD12	tudor domain containing 12	2	10.5	0.7	4.6	0.00727	0	0.25811
ENSG00000169375	SIN3A	SIN3 transcription regulator family member A	-2.4	10.5	-4.9	-0.7	0.00727	0	0.257663
ENSG00000172236	TPSAB1	tryptase alpha/beta 1	-2.4	10.5	-5.4	-0.8	0.00727	0	0.257217
ENSG00000184857	TMEM186	transmembrane protein 186	2.1	10.4	0.7	4	0.00739	0	0.261011
ENSG00000241343	RPL36A	ribosomal protein L36a	2	10.4	0.7	4.2	0.00739	0	0.260561
ENSG00000173110	HSPA6	heat shock 70kDa protein 6 (HSP70B')	2.3	10.4	0.8	4.4	0.00739	0	0.260113
ENSG00000123561	SERPINA7	serpin peptidase inhibitor, clade A (alpha-1 antiproteinase, antitrypsin), member 7	-2.1	10.4	-4.5	-0.8	0.00739	0	0.259666
ENSG00000232535	OR5H8P	olfactory receptor, family 5, subfamily H, member 8 pseudogene	4.4	10.4	1.4	9.1	0.00739	0	0.25922
ENSG00000133136	GNG5P2	guanine nucleotide binding protein (G protein), gamma 5 pseudogene 2	2	10.4	0.7	4	0.00739	0	0.258777
ENSG00000106631	MYL7	myosin, light chain 7, regulatory	5.2	10.4	2.1	10.2	0.00739	0	0.258334
ENSG00000122711	SPINK4	serine peptidase inhibitor, Kazal type 4	2.4	10.4	1	4.7	0.00739	0	0.257893
ENSG00000139220	PPFIA2	protein tyrosine phosphatase, receptor type, f polypeptide (PTPRF), interacting protein (liprin), alpha 2	-1.8	10.4	-5.6	-0.4	0.00739	0	0.257454
ENSG00000028839	TBPL1	TBP-like 1	-2.2	10.4	-4.4	-0.7	0.00739	0	0.257016
ENSG00000160584	SIK3	SIK family kinase 3	1.6	10.4	0.6	3.2	0.00739	0	0.25658
ENSG00000149133	OR5F1	olfactory receptor, family 5, subfamily F, member 1	5.5	10.4	-0.3	11	0.00739	0	0.256145
ENSG00000100364	KIAA0930	KIAA0930	-1.7	10.4	-7.1	-0.5	0.00739	0	0.255712
ENSG00000179038	AP001885.1	N/A	-2.3	10.3	-5	-0.8	0.00755	0	0.260807
ENSG00000177150	FAM210A	family with sequence similarity 210, member A	4.9	10.3	2.1	9.9	0.00755	0	0.260367
ENSG00000128581	RABL5	N/A	2.7	10.3	1	5.4	0.00755	0	0.259928
ENSG00000185945	NXF2B	nuclear RNA export factor 2B	3.6	10.3	2.1	7.9	0.00755	0	0.259492
ENSG00000256553	TRAV1-2	T cell receptor alpha variable 1-2	-2.4	10.3	-5	-0.7	0.00755	0	0.259056
ENSG00000149483	TMEM138	transmembrane protein 138	2.8	10.3	0.8	5.7	0.00755	0	0.258622
ENSG00000106635	BCL7B	B-cell CLL/lymphoma 7B	3.9	10.3	1.6	7.7	0.00755	0	0.25819
ENSG00000143869	GDF7	growth differentiation factor 7	2.4	10.3	0.8	5.2	0.00755	0	0.257759
ENSG00000079459	FDFT1	farnesyl-diphosphate farnesyltransferase 1	2	10.3	0.7	5.2	0.00755	0	0.257329
ENSG00000156958	GALK2	galactokinase 2	-1.8	10.3	-3.6	-0.6	0.00755	0	0.256901
ENSG00000156009	MAGEA8	melanoma antigen family A, 8	-2.1	10.3	-4.2	-0.6	0.00755	0	0.256474
ENSG00000173581	CCDC106	coiled-coil domain containing 106	2	10.3	0.7	4.2	0.00755	0	0.256049
ENSG00000167977	KCTD5	potassium channel tetramerization domain containing 5	-1.9	10.2	-4.1	-0.7	0.00768	0	0.260026
ENSG00000154678	PDE1C	phosphodiesterase 1C, calmodulin-dependent 70kDa	3.2	10.2	1	5.8	0.00768	0	0.259597
ENSG00000173039	RELA	v-rel avian reticuloendotheliosis viral oncogene homolog A	2.5	10.2	1	5.4	0.00768	0	0.259168
ENSG00000027001	MIPEP	mitochondrial intermediate peptidase	3.9	10.2	1.7	7.7	0.00768	0	0.258741
ENSG00000011426	ANLN	anillin, actin binding protein	4.4	10.2	2.1	9.9	0.00768	0	0.258316
ENSG00000108395	TRIM37	tripartite motif containing 37	-2.1	10.2	-4.6	-0.6	0.00768	0	0.257892
ENSG00000153885	KCTD15	potassium channel tetramerization domain containing 15	1.8	10.2	0.6	3.6	0.00768	0	0.257469
ENSG00000258790	KIAA0391	KIAA0391	5.2	10.2	2.5	10.3	0.00768	0	0.257047
ENSG00000142546	NOSIP	nitric oxide synthase interacting protein	1.6	10.2	0.6	2.9	0.00768	0	0.256627
ENSG00000138119	MYOF	myoferlin	2.9	10.2	0.8	5.5	0.00768	0	0.256209
ENSG00000221946	FXYD7	FXYD domain containing ion transport regulator 7	1.8	10.2	0.7	3.8	0.00768	0	0.255792
ENSG00000105270	CLIP3	CAP-GLY domain containing linker protein 3	2.4	10.2	0.8	4.7	0.00768	0	0.255376
ENSG00000146963	C7ORF55-LUC7L2	C7orf55-LUC7L2 readthrough	2.7	10.2	1.2	5.5	0.00768	0	0.254961
ENSG00000130544	ZNF557	zinc finger protein 557	3.1	10.2	1.2	6.6	0.00768	0	0.254548
ENSG00000151849	CENPJ	centromere protein J	3.2	10.1	1.2	7.5	0.00784	0	0.25943
ENSG00000168995	SIGLEC7	sialic acid binding Ig-like lectin 7	2	10.1	0.7	3.9	0.00784	0	0.259011
ENSG00000273269	RP11-761B3.1	N/A	-2.4	10.1	-7	5.2	0.00784	0	0.258594
ENSG00000158477	CD1A	CD1a molecule	2.4	10.1	0.8	5.2	0.00784	0	0.258177
ENSG00000137818	RPLP1	ribosomal protein, large, P1	3	10.1	1.1	6.5	0.00784	0	0.257762
ENSG00000226174	TEX22	testis expressed 22	2.5	10.1	0.8	4.9	0.00784	0	0.257348
ENSG00000166839	ANKDD1A	ankyrin repeat and death domain containing 1A	-2	10.1	-3.8	-0.7	0.00784	0	0.256936
ENSG00000174953	DHX36	DEAH (Asp-Glu-Ala-His) box polypeptide 36	2.7	10.1	0.7	5.7	0.00784	0	0.256525
ENSG00000270299	RP5-850E9.3	N/A	-2	10.1	-4.8	-0.7	0.00784	0	0.256115
ENSG00000153896	ZNF599	zinc finger protein 599	1.7	10.1	0.6	3.5	0.00784	0	0.255707
ENSG00000110063	DCPS	decapping enzyme, scavenger	4.2	10.1	1.8	9.5	0.00784	0	0.255299
ENSG00000078304	PPP2R5C	protein phosphatase 2, regulatory subunit B', gamma	-2.9	10.1	-6.4	-0.8	0.00784	0	0.254893
ENSG00000081818	PCDHB4	protocadherin beta 4	2.6	10	0.8	5.6	0.00799	0	0.259358
ENSG00000164414	SLC35A1	solute carrier family 35 (CMP-sialic acid transporter), member A1	-2.1	10	-4.6	-0.6	0.00799	0	0.258947
ENSG00000089335	ZNF302	zinc finger protein 302	2.4	10	0.7	4.5	0.00799	0	0.258537
ENSG00000129933	MAU2	MAU2 sister chromatid cohesion factor	3.1	10	1.1	5.6	0.00799	0	0.258129
ENSG00000168769	TET2	tet methylcytosine dioxygenase 2	3.1	10	1.1	6.6	0.00799	0	0.257722
ENSG00000155189	AGPAT5	1-acylglycerol-3-phosphate O-acyltransferase 5	2	10	0.7	4.1	0.00799	0	0.257316
ENSG00000079393	DUSP13	dual specificity phosphatase 13	-1.9	10	-3.9	-0.7	0.00799	0	0.256911
ENSG00000170266	GLB1	galactosidase, beta 1	1.7	10	0.6	3.3	0.00799	0	0.256508
ENSG00000165646	SLC18A2	solute carrier family 18 (vesicular monoamine transporter), member 2	-1.8	10	-3.7	-0.6	0.00799	0	0.256106
ENSG00000121289	CEP89	centrosomal protein 89kDa	2.2	9.99	0.7	4.9	0.008	0	0.256025
ENSG00000163808	KIF15	kinesin family member 15	-2.9	9.99	-7.5	-0.8	0.008	0	0.255625
ENSG00000161265	U2AF1L4	U2 small nuclear RNA auxiliary factor 1-like 4	1.6	9.98	0.6	3.4	0.00802	0	0.255864
ENSG00000130311	DDA1	DET1 and DDB1 associated 1	-2.5	9.97	-5	-0.8	0.00805	0	0.256421
ENSG00000110713	NUP98	nucleoporin 98kDa	-1.6	9.97	-3.2	-0.5	0.00805	0	0.256023
ENSG00000100227	POLDIP3	polymerase (DNA-directed), delta interacting protein 3	2.4	9.96	0.9	5.1	0.00807	0	0.25626
ENSG00000080854	IGSF9B	immunoglobulin superfamily, member 9B	2.2	9.96	0.7	4	0.00807	0	0.255863
ENSG00000144589	STK11IP	serine/threonine kinase 11 interacting protein	2.2	9.93	0.8	4.2	0.00811	0	0.256733
ENSG00000157017	GHRL	ghrelin/obestatin prepropeptide	2.2	9.92	0.7	5.7	0.00814	0	0.257284
ENSG00000168256	NKIRAS2	NFKB inhibitor interacting Ras-like 2	5.1	9.91	2.2	10.4	0.00815	0	0.257203
ENSG00000204422	XXBAC-BPG32J3.20	N/A	-2.3	9.91	-5	-0.6	0.00815	0	0.256807
ENSG00000119574	ZBTB45	zinc finger and BTB domain containing 45	3.4	9.91	1.3	7.4	0.00815	0	0.256412
ENSG00000166401	SERPINB8	serpin peptidase inhibitor, clade B (ovalbumin), member 8	5.4	9.91	2.3	11.9	0.00815	0	0.256018
ENSG00000106086	PLEKHA8	pleckstrin homology domain containing, family A (phosphoinositide binding specific) member 8	2.2	9.87	0.8	4.1	0.00822	0	0.257821
ENSG00000121931	LRIF1	ligand dependent nuclear receptor interacting factor 1	2.7	9.85	0.8	5	0.00826	0	0.258678
ENSG00000112053	SLC26A8	solute carrier family 26 (anion exchanger), member 8	2.3	9.84	0.8	5.6	0.00828	0	0.258908
ENSG00000002822	MAD1L1	MAD1 mitotic arrest deficient-like 1 (yeast)	1.9	9.83	0.6	3.7	0.0083	0	0.259137
ENSG00000168214	RBPJ	recombination signal binding protein for immunoglobulin kappa J region	-1.9	9.83	-4.7	-0.7	0.0083	0	0.258742
ENSG00000120137	PANK3	pantothenate kinase 3	2.1	9.83	0.7	4.4	0.0083	0	0.258349
ENSG00000181458	TMEM45A	transmembrane protein 45A	2	9.82	0.6	4	0.00832	0	0.258578
ENSG00000185721	DRG1	developmentally regulated GTP binding protein 1	3.6	9.81	0.8	7.8	0.00834	0	0.258806
ENSG00000102786	INTS6	integrator complex subunit 6	-1.6	9.8	-3.3	-0.6	0.00836	0	0.259033
ENSG00000167840	ZNF232	zinc finger protein 232	-2	9.8	-4	-0.6	0.00836	0	0.258641
ENSG00000144015	TRIM43	tripartite motif containing 43	-1.9	9.78	-4	-0.7	0.00841	0	0.259795
ENSG00000182318	ZSCAN22	zinc finger and SCAN domain containing 22	2.4	9.77	0.8	5.1	0.00843	0	0.26002
ENSG00000167103	PIP5KL1	phosphatidylinositol-4-phosphate 5-kinase-like 1	4.9	9.75	1.9	9.2	0.00847	0	0.260861
ENSG00000012963	UBR7	ubiquitin protein ligase E3 component n-recognin 7 (putative)	2	9.74	0.7	3.9	0.00848	0	0.260776
ENSG00000101782	RIOK3	RIO kinase 3	-2.4	9.73	-5.4	-0.6	0.0085	0	0.260998
ENSG00000172985	SH3RF3	SH3 domain containing ring finger 3	2.1	9.72	0.6	4.6	0.00851	0	0.260914
ENSG00000095059	DHPS	deoxyhypusine synthase	3.2	9.72	1.1	7.2	0.00851	0	0.260523
ENSG00000074054	CLASP1	cytoplasmic linker associated protein 1	2.8	9.71	0.9	5.8	0.00853	0	0.260745
ENSG00000187605	TET3	tet methylcytosine dioxygenase 3	2.4	9.71	0.7	4.5	0.00853	0	0.260356
ENSG00000089327	FXYD5	FXYD domain containing ion transport regulator 5	2.4	9.7	0.8	5.8	0.00855	0	0.260577
ENSG00000075856	SART3	squamous cell carcinoma antigen recognized by T cells 3	4.7	9.7	1.5	9	0.00855	0	0.26019
ENSG00000169071	ROR2	receptor tyrosine kinase-like orphan receptor 2	1.9	9.69	0.6	3.9	0.00857	0	0.260411
ENSG00000151502	VPS26B	vacuolar protein sorting 26 homolog B (S. pombe)	4.3	9.68	1.5	9.4	0.00859	0	0.260631
ENSG00000116754	SRSF11	serine/arginine-rich splicing factor 11	-2.1	9.65	-4.9	-0.7	0.00865	0	0.262063
ENSG00000102401	ARMCX3	armadillo repeat containing, X-linked 3	5.9	9.62	1.9	12	0.00871	0	0.26349
ENSG00000160813	PPP1R35	protein phosphatase 1, regulatory subunit 35	2.4	9.62	0.7	5.3	0.00871	0	0.263101
ENSG00000270386	UGT2A1	UDP glucuronosyltransferase 2 family, polypeptide A1, complex locus	3	9.62	-0.3	7	0.00871	0	0.262713
ENSG00000176248	ANAPC2	anaphase promoting complex subunit 2	-1.8	9.61	-4	-0.5	0.00872	0	0.262627
ENSG00000174992	ZG16	zymogen granule protein 16	3.6	9.6	1.4	7.6	0.00873	0	0.262542
ENSG00000134504	KCTD1	potassium channel tetramerization domain containing 1	5.1	9.59	2.3	10.5	0.00875	0	0.262757
ENSG00000213965	NUDT19	nudix (nucleoside diphosphate linked moiety X)-type motif 19	1.6	9.59	0.6	3.3	0.00875	0	0.262372
ENSG00000114923	SLC4A3	solute carrier family 4 (anion exchanger), member 3	1.8	9.58	0.5	4.3	0.00877	0	0.262586
ENSG00000185860	C1ORF110	chromosome 1 open reading frame 110	5	9.57	2	11.1	0.00879	0	0.2628
ENSG00000070495	JMJD6	jumonji domain containing 6	1.9	9.56	0.7	5	0.00881	0	0.263014
ENSG00000158406	HIST1H4H	histone cluster 1, H4h	4.3	9.56	1.4	9.3	0.00881	0	0.26263
ENSG00000179751	SYCN	syncollin	2.2	9.55	0.7	4.5	0.00884	0	0.263141
ENSG00000150627	WDR17	WD repeat domain 17	2.1	9.54	0.7	3.7	0.00886	0	0.263353
ENSG00000119655	NPC2	Niemann-Pick disease, type C2	1.9	9.53	0.6	4	0.00887	0	0.263268
ENSG00000099250	NRP1	neuropilin 1	2.2	9.52	0.7	4.3	0.00889	0	0.263479
ENSG00000150961	SEC24D	SEC24 family member D	1.9	9.52	0.6	4.1	0.00889	0	0.263098
ENSG00000185651	UBE2L3	ubiquitin-conjugating enzyme E2L 3	-1.9	9.5	-4.1	-0.5	0.00893	0	0.2639
ENSG00000130962	PRRG1	proline rich Gla (G-carboxyglutamic acid) 1	2.7	9.5	0.8	5.4	0.00893	0	0.263519
ENSG00000204387	C6ORF48	chromosome 6 open reading frame 48	2.9	9.5	1.2	6.2	0.00893	0	0.263139
ENSG00000172199	OR8U1	olfactory receptor, family 8, subfamily U, member 1	-2	9.49	-4.2	-0.6	0.00894	0	0.263055
ENSG00000162511	LAPTM5	lysosomal protein transmembrane 5	-1.9	9.49	-4.8	-0.6	0.00894	0	0.262677
ENSG00000166454	ATMIN	ATM interactor	1.9	9.47	0.6	3.9	0.00899	0	0.263767
ENSG00000171631	P2RY6	pyrimidinergic receptor P2Y, G-protein coupled, 6	-1.5	9.47	-3	-0.4	0.00899	0	0.263389
ENSG00000176788	BASP1	brain abundant, membrane attached signal protein 1	3.4	9.45	1.1	7.1	0.00902	0	0.26389
ENSG00000181409	AATK	apoptosis-associated tyrosine kinase	2.8	9.44	0.8	5.3	0.00905	0	0.264389
ENSG00000167985	SDHAF2	succinate dehydrogenase complex assembly factor 2	3.2	9.44	1	6.2	0.00905	0	0.264012
ENSG00000100167	2018-09-03	septin 3	3.3	9.43	1.1	6	0.00907	0	0.264219
ENSG00000123066	MED13L	mediator complex subunit 13-like	2.4	9.43	0.7	5.2	0.00907	0	0.263843
ENSG00000268791	AC093323.1	N/A	1.8	9.43	0.6	3.6	0.00907	0	0.263468
ENSG00000072041	SLC6A15	solute carrier family 6 (neutral amino acid transporter), member 15	2.2	9.42	0.7	5.2	0.00909	0	0.263674
ENSG00000169860	P2RY1	purinergic receptor P2Y, G-protein coupled, 1	2.6	9.42	0.8	6.8	0.00909	0	0.263301
ENSG00000177051	FBXO46	F-box protein 46	2.5	9.39	0.6	6.4	0.00916	0	0.264953
ENSG00000161057	PSMC2	proteasome (prosome, macropain) 26S subunit, ATPase, 2	3.2	9.38	1	6.6	0.00918	0	0.265157
ENSG00000102921	N4BP1	NEDD4 binding protein 1	-1.6	9.38	-3.8	-0.5	0.00918	0	0.264783
ENSG00000072571	HMMR	hyaluronan-mediated motility receptor (RHAMM)	2.5	9.38	0.7	5.6	0.00918	0	0.26441
ENSG00000139354	GAS2L3	growth arrest-specific 2 like 3	-1.9	9.37	-3.6	-0.6	0.0092	0	0.264613
ENSG00000144048	DUSP11	dual specificity phosphatase 11 (RNA/RNP complex 1-interacting)	-1.8	9.36	-3.7	-0.5	0.00922	0	0.264816
ENSG00000112337	SLC17A2	solute carrier family 17, member 2	2.6	9.35	0.8	6.2	0.00925	0	0.265305
ENSG00000269858	EGLN2	egl-9 family hypoxia-inducible factor 2	1.6	9.35	0.6	3.4	0.00925	0	0.264933
ENSG00000172500	FIBP	fibroblast growth factor (acidic) intracellular binding protein	-1.6	9.35	-3.5	-0.5	0.00925	0	0.264563
ENSG00000153487	ING1	inhibitor of growth family, member 1	-1.5	9.34	-2.9	-0.5	0.00928	0	0.26505
ENSG00000139977	NAA30	N(alpha)-acetyltransferase 30, NatC catalytic subunit	2.3	9.34	0.6	5.6	0.00928	0	0.264681
ENSG00000163166	IWS1	IWS1 homolog (S. cerevisiae)	-2.3	9.32	-6.6	-0.6	0.00931	0	0.265166
ENSG00000198162	MAN1A2	mannosidase, alpha, class 1A, member 2	2.6	9.32	0.7	5.8	0.00931	0	0.264798
ENSG00000170088	TMEM192	transmembrane protein 192	1.8	9.31	0.5	3.8	0.00933	0	0.264998
ENSG00000141560	FN3KRP	fructosamine 3 kinase related protein	2.1	9.31	0.6	5.1	0.00933	0	0.26463
ENSG00000100242	SUN2	Sad1 and UNC84 domain containing 2	2.7	9.3	0.6	5.6	0.00935	0	0.26483
ENSG00000172053	QARS	glutaminyl-tRNA synthetase	3.7	9.3	1.3	8.8	0.00935	0	0.264464
ENSG00000106038	EVX1	even-skipped homeobox 1	2.5	9.3	0.7	5	0.00935	0	0.264099
ENSG00000121413	ZSCAN18	zinc finger and SCAN domain containing 18	2.4	9.28	0.7	4.8	0.00939	0	0.264863
ENSG00000102144	PGK1	phosphoglycerate kinase 1	3.2	9.28	1	7.3	0.00939	0	0.264498
ENSG00000198056	PRIM1	primase, DNA, polypeptide 1 (49kDa)	-1.8	9.27	-4.3	-0.6	0.00941	0	0.264697
ENSG00000183684	ALYREF	Aly/REF export factor	3.1	9.24	0.9	6.7	0.00947	0	0.266019
ENSG00000188295	ZNF669	zinc finger protein 669	2	9.22	0.6	4.2	0.00952	0	0.267056
ENSG00000058673	ZC3H11A	zinc finger CCCH-type containing 11A	-1.6	9.21	-3.6	-0.5	0.00954	0	0.267251
ENSG00000155096	AZIN1	antizyme inhibitor 1	2	9.21	0.6	4.1	0.00954	0	0.266885
ENSG00000155975	VPS37A	vacuolar protein sorting 37 homolog A (S. cerevisiae)	-2.3	9.21	-4.5	-0.6	0.00954	0	0.26652
ENSG00000183814	LIN9	lin-9 DREAM MuvB core complex component	-1.7	9.2	-4.1	-0.6	0.00956	0	0.266715
ENSG00000134744	ZCCHC11	zinc finger, CCHC domain containing 11	2.5	9.18	0.7	4.8	0.0096	0	0.267466
ENSG00000169710	FASN	fatty acid synthase	1.5	9.18	0.5	3.1	0.0096	0	0.267102
ENSG00000163590	PPM1L	protein phosphatase, Mg2+/Mn2+ dependent, 1L	2	9.17	0.7	4.2	0.00963	0	0.267573
ENSG00000197324	LRP10	low density lipoprotein receptor-related protein 10	2.7	9.17	1	6.6	0.00963	0	0.26721
ENSG00000100312	ACR	acrosin	2.6	9.16	0.7	5.1	0.00966	0	0.267679
ENSG00000196296	ATP2A1	ATPase, Ca++ transporting, cardiac muscle, fast twitch 1	-2	9.16	-4.6	-0.5	0.00966	0	0.267317
ENSG00000106304	SPAM1	sperm adhesion molecule 1 (PH-20 hyaluronidase, zona pellucida binding)	-2.5	9.15	-5.3	-0.6	0.00968	0	0.267508
ENSG00000163738	MTHFD2L	methylenetetrahydrofolate dehydrogenase (NADP+ dependent) 2-like	2.7	9.14	0.7	5.9	0.0097	0	0.267699
ENSG00000240871	KRTAP4-7	keratin associated protein 4-7	2.3	9.14	0.7	4.9	0.0097	0	0.267338
ENSG00000069667	RORA	RAR-related orphan receptor A	1.9	9.14	0.6	4.1	0.0097	0	0.266978
ENSG00000028528	SNX1	sorting nexin 1	-1.8	9.14	-5.6	-0.1	0.0097	0	0.26662
ENSG00000165806	CASP7	caspase 7, apoptosis-related cysteine peptidase	-2.1	9.13	-5	-0.5	0.00973	0	0.267085
ENSG00000113658	SMAD5	SMAD family member 5	3	9.12	0.8	6.6	0.00975	0	0.267275
ENSG00000141577	AZI1	N/A	-1.8	9.11	-8	4.4	0.00976	0	0.267191
ENSG00000171608	PIK3CD	phosphatidylinositol-4,5-bisphosphate 3-kinase, catalytic subunit delta	2.1	9.11	0.7	4.3	0.00976	0	0.266834
ENSG00000269549	AL031663.2	N/A	-2.1	9.1	-4.6	-0.6	0.00979	0	0.267297
ENSG00000166926	MS4A6E	membrane-spanning 4-domains, subfamily A, member 6E	1.8	9.1	0.5	3.7	0.00979	0	0.266941
ENSG00000126860	EVI2A	ecotropic viral integration site 2A	-1.8	9.09	-4	-0.5	0.00982	0	0.267402
ENSG00000243244	STON1	stonin 1	3.6	9.08	1.3	7.2	0.00985	0	0.267862
ENSG00000011677	GABRA3	gamma-aminobutyric acid (GABA) A receptor, alpha 3	1.7	9.08	0.6	3.7	0.00985	0	0.267507
ENSG00000257411	RP11-603J24.9	N/A	4.7	9.07	2.2	9.6	0.00988	0	0.267966
ENSG00000179528	LBX2	ladybird homeobox 2	2.4	9.06	0.6	5.3	0.00992	0	0.268694
ENSG00000244617	ASPRV1	aspartic peptidase, retroviral-like 1	1.6	9.04	0.5	3.3	0.00996	0	0.269421
ENSG00000119599	DCAF4	DDB1 and CUL4 associated factor 4	4.3	9.04	2.2	10.2	0.00996	0	0.269065
ENSG00000153902	LGI4	leucine-rich repeat LGI family, member 4	2.1	9.03	0.6	4	0.00999	0	0.269519
ENSG00000104967	NOVA2	neuro-oncological ventral antigen 2	1.9	9.03	0.6	3.9	0.00999	0	0.269164
ENSG00000181638	ZFP41	ZFP41 zinc finger protein	2.9	9.03	0.8	7.5	0.00999	0	0.26881
ENSG00000169679	BUB1	BUB1 mitotic checkpoint serine/threonine kinase	-1.7	9.02	-3.9	-0.5	0.01	0	0.268725
ENSG00000110274	CEP164	centrosomal protein 164kDa	2.3	9.02	0.6	4.2	0.01	0	0.268373
ENSG00000130119	GNL3L	guanine nucleotide binding protein-like 3 (nucleolar)-like	2	9.01	0.7	4.1	0.0101	0	0.270701
ENSG00000167850	CD300C	CD300c molecule	-2	9.01	-4.5	-0.6	0.0101	0	0.270347
ENSG00000171224	C10ORF35	chromosome 10 open reading frame 35	2.5	9	0.8	5	0.0101	0	0.269993
ENSG00000168038	ULK4	unc-51 like kinase 4	-1.8	9	-4	-0.5	0.0101	0	0.269641
ENSG00000124532	MRS2	MRS2 magnesium transporter	1.7	9	0.5	3.7	0.0101	0	0.269289
ENSG00000164430	MB21D1	Mab-21 domain containing 1	2.4	8.99	0.8	5.1	0.0101	0	0.268939
ENSG00000130385	BMP15	bone morphogenetic protein 15	2.2	8.99	0.7	4.5	0.0101	0	0.268589
ENSG00000181544	FANCB	Fanconi anemia, complementation group B	1.6	8.99	0.4	3.2	0.0101	0	0.26824
ENSG00000148090	AUH	AU RNA binding protein/enoyl-CoA hydratase	3.1	8.99	0.9	6.8	0.0101	0	0.267892
ENSG00000138286	FAM149B1	family with sequence similarity 149, member B1	1.8	8.99	0.5	4	0.0101	0	0.267545
ENSG00000206538	VGLL3	vestigial-like family member 3	2.6	8.98	0.7	6.1	0.0101	0	0.267199
ENSG00000116016	EPAS1	endothelial PAS domain protein 1	1.9	8.98	0.6	4.1	0.0101	0	0.266854
ENSG00000105186	ANKRD27	ankyrin repeat domain 27 (VPS9 domain)	1.9	8.98	0.6	4.9	0.0101	0	0.26651
ENSG00000161956	SENP3	SUMO1/sentrin/SMT3 specific peptidase 3	-1.9	8.97	-4.5	-0.5	0.0102	0	0.268802
ENSG00000118263	KLF7	Kruppel-like factor 7 (ubiquitous)	-1.8	8.97	-4	-0.5	0.0102	0	0.268456
ENSG00000108854	SMURF2	SMAD specific E3 ubiquitin protein ligase 2	2.1	8.96	0.7	3.8	0.0102	0	0.268111
ENSG00000103995	CEP152	centrosomal protein 152kDa	-2.3	8.96	-5	-0.6	0.0102	0	0.267766
ENSG00000267881	CEA	carcinoembryonic antigen gene family	2.6	8.94	0.8	5.8	0.0103	0	0.270045
ENSG00000136240	KDELR2	KDEL (Lys-Asp-Glu-Leu) endoplasmic reticulum protein retention receptor 2	3.5	8.94	1.3	8.1	0.0103	0	0.269699
ENSG00000186635	ARAP1	ArfGAP with RhoGAP domain, ankyrin repeat and PH domain 1	3.5	8.93	0.9	8.8	0.0103	0	0.269354
ENSG00000168538	TRAPPC11	trafficking protein particle complex 11	2.6	8.93	0.8	5.6	0.0103	0	0.26901
ENSG00000213921	LEUTX	leucine twenty homeobox	2.4	8.93	0.6	4.9	0.0103	0	0.268667
ENSG00000182359	KBTBD3	kelch repeat and BTB (POZ) domain containing 3	1.9	8.93	0.5	4.1	0.0103	0	0.268325
ENSG00000103811	CTSH	cathepsin H	2.2	8.93	0.6	4.6	0.0103	0	0.267983
ENSG00000203812	HIST2H2AA4	histone cluster 2, H2aa4	2.1	8.92	0.5	6.3	0.0103	0	0.267643
ENSG00000205189	ZBTB10	zinc finger and BTB domain containing 10	1.6	8.92	0.5	3.8	0.0103	0	0.267303
ENSG00000105829	BET1	Bet1 golgi vesicular membrane trafficking protein	-1.7	8.92	-3.5	-0.5	0.0103	0	0.266965
ENSG00000131864	USP29	ubiquitin specific peptidase 29	2.6	8.91	0.7	5.1	0.0103	0	0.266627
ENSG00000105656	ELL	elongation factor RNA polymerase II	-1.4	8.9	-3	-0.5	0.0104	0	0.268875
ENSG00000267849	AL133262.1	N/A	2.9	8.9	1.2	7.2	0.0104	0	0.268535
ENSG00000125740	FOSB	FBJ murine osteosarcoma viral oncogene homolog B	2.4	8.9	0.6	5.2	0.0104	0	0.268197
ENSG00000143105	KCNA10	potassium voltage-gated channel, shaker-related subfamily, member 10	2.2	8.89	0.6	4.8	0.0104	0	0.267859
ENSG00000033867	SLC4A7	solute carrier family 4, sodium bicarbonate cotransporter, member 7	1.8	8.87	0.5	4.1	0.0104	0	0.267522
ENSG00000234949	AC104667.3	N/A	2.2	8.85	0.8	4.8	0.0105	0	0.269755
ENSG00000083444	PLOD1	procollagen-lysine, 2-oxoglutarate 5-dioxygenase 1	5.5	8.85	3.3	10.8	0.0105	0	0.269417
ENSG00000188783	PRELP	proline/arginine-rich end leucine-rich repeat protein	-1.7	8.84	-3.8	-0.5	0.0105	0	0.269079
ENSG00000138166	DUSP5	dual specificity phosphatase 5	1.8	8.84	0.6	4.7	0.0105	0	0.268742
ENSG00000089041	P2RX7	purinergic receptor P2X, ligand-gated ion channel, 7	3.5	8.83	1.1	7.2	0.0106	0	0.270962
ENSG00000065427	KARS	lysyl-tRNA synthetase	4.8	8.83	2.7	10	0.0106	0	0.270624
ENSG00000173531	MST1	macrophage stimulating 1 (hepatocyte growth factor-like)	2.3	8.83	0.6	6.3	0.0106	0	0.270287
ENSG00000117419	ERI3	ERI1 exoribonuclease family member 3	2.8	8.82	1	5.7	0.0106	0	0.26995
ENSG00000204807	FAM27E2	family with sequence similarity 27, member E2	4	8.81	1.7	9.8	0.0106	0	0.269614
ENSG00000124299	PEPD	peptidase D	1.6	8.81	0.5	4.5	0.0106	0	0.26928
ENSG00000224916	APOC4-APOC2	APOC4-APOC2 readthrough (NMD candidate)	1.8	8.8	0.5	4.8	0.0106	0	0.268945
ENSG00000168939	SPRY3	sprouty homolog 3 (Drosophila)	4.2	8.8	1.2	8.8	0.0106	0	0.268612
ENSG00000105397	TYK2	tyrosine kinase 2	2.1	8.8	0.6	4.7	0.0106	0	0.26828
ENSG00000100425	BRD1	bromodomain containing 1	3	8.78	-1.4	7	0.0107	0	0.270476
ENSG00000172113	NME6	NME/NM23 nucleoside diphosphate kinase 6	2	8.78	0.5	4.2	0.0107	0	0.270142
ENSG00000162290	DCP1A	decapping mRNA 1A	-1.7	8.77	-3.6	-0.5	0.0107	0	0.269809
ENSG00000059378	PARP12	poly (ADP-ribose) polymerase family, member 12	2.5	8.77	0.6	6.2	0.0107	0	0.269477
ENSG00000062598	ELMO2	engulfment and cell motility 2	1.9	8.77	0.5	4	0.0107	0	0.269145
ENSG00000166164	BRD7	bromodomain containing 7	3.8	8.77	0.8	7.7	0.0107	0	0.268814
ENSG00000114480	GBE1	glucan (1,4-alpha-), branching enzyme 1	-1.6	8.75	-3.8	-0.4	0.0108	0	0.270994
ENSG00000244165	P2RY11	purinergic receptor P2Y, G-protein coupled, 11	2.2	8.75	0.5	4.4	0.0108	0	0.270662
ENSG00000143748	NVL	nuclear VCP-like	4.9	8.74	2.5	11.5	0.0108	0	0.27033
ENSG00000164134	NAA15	N(alpha)-acetyltransferase 15, NatA auxiliary subunit	1.8	8.74	0.5	5	0.0108	0	0.27
ENSG00000183580	FBXL7	F-box and leucine-rich repeat protein 7	2	8.74	0.6	4.2	0.0108	0	0.26967
ENSG00000214686	IQCF6	IQ motif containing F6	-2.8	8.73	-8	1.5	0.0108	0	0.269341
ENSG00000121892	PDS5A	PDS5, regulator of cohesion maintenance, homolog A (S. cerevisiae)	-1.6	8.73	-3.5	-0.5	0.0108	0	0.269013
ENSG00000055955	ITIH4	inter-alpha-trypsin inhibitor heavy chain family, member 4	2.1	8.73	0.7	4.2	0.0108	0	0.268686
ENSG00000257088	PNMA6D	paraneoplastic Ma antigen family member 6D (pseudogene)	3.8	8.73	1	8.3	0.0108	0	0.26836
ENSG00000078018	MAP2	microtubule-associated protein 2	2.5	8.72	0.7	4.9	0.0109	0	0.270516
ENSG00000254858	MPV17L2	MPV17 mitochondrial membrane protein-like 2	2.7	8.72	0.8	8.1	0.0109	0	0.270188
ENSG00000126752	SSX1	synovial sarcoma, X breakpoint 1	-1.6	8.71	-3.4	-0.4	0.0109	0	0.269861
ENSG00000122304	PRM2	protamine 2	-2	8.71	-4.2	-0.6	0.0109	0	0.269534
ENSG00000103035	PSMD7	proteasome (prosome, macropain) 26S subunit, non-ATPase, 7	-1.4	8.7	-3	-0.4	0.0109	0	0.269209
ENSG00000115295	CLIP4	CAP-GLY domain containing linker protein family, member 4	1.9	8.7	0.6	4.4	0.0109	0	0.268884
ENSG00000270033	RP11-51L5.7	N/A	1.9	8.69	0.6	3.9	0.0109	0	0.26856
ENSG00000163535	SGOL2	shugoshin-like 2 (S. pombe)	-1.9	8.68	-4.1	-0.5	0.011	0	0.270698
ENSG00000075624	ACTB	actin, beta	2.4	8.68	0.7	5.4	0.011	0	0.270373
ENSG00000183396	TMEM89	transmembrane protein 89	-1.9	8.67	-4.8	-0.6	0.011	0	0.270048
ENSG00000227450	CTB-58E17.5	N/A	2.9	8.67	0.8	6.1	0.011	0	0.269724
ENSG00000241484	ARHGAP8	Rho GTPase activating protein 8	1.9	8.66	0.5	3.7	0.011	0	0.269401
ENSG00000196367	TRRAP	transformation/transcription domain-associated protein	1.9	8.65	-2	6	0.0111	0	0.271525
ENSG00000159593	NAE1	NEDD8 activating enzyme E1 subunit 1	1.8	8.64	0.5	3.9	0.0111	0	0.271201
ENSG00000136731	UGGT1	UDP-glucose glycoprotein glucosyltransferase 1	-2.2	8.64	-6.7	-0.7	0.0111	0	0.270877
ENSG00000204427	ABHD16A	abhydrolase domain containing 16A	4	8.62	1.5	8.2	0.0112	0	0.272992
ENSG00000237102	AC040160.1	N/A	2.8	8.61	0.7	5.9	0.0112	0	0.272667
ENSG00000181961	OR4A16	olfactory receptor, family 4, subfamily A, member 16	-1.8	8.61	-4	-0.4	0.0112	0	0.272342
ENSG00000074276	CDHR2	cadherin-related family member 2	1.8	8.59	0.5	4.4	0.0113	0	0.274448
ENSG00000238074	TSPY6P	testis specific protein, Y-linked 6, pseudogene	3.6	8.59	1.4	7.6	0.0113	0	0.274122
ENSG00000156140	ADAMTS3	ADAM metallopeptidase with thrombospondin type 1 motif, 3	4.5	8.58	1.7	10.3	0.0113	0	0.273797
ENSG00000130939	UBE4B	ubiquitination factor E4B	-2.6	8.58	-5.8	-0.6	0.0113	0	0.273473
ENSG00000170515	PA2G4	proliferation-associated 2G4, 38kDa	2.4	8.57	0.7	6.9	0.0113	0	0.27315
ENSG00000179292	TMEM151A	transmembrane protein 151A	-2.3	8.56	-5.3	-0.9	0.0114	0	0.275242
ENSG00000158290	CUL4B	cullin 4B	-2.4	8.56	-5.4	-0.6	0.0114	0	0.274917
ENSG00000171469	ZNF561	zinc finger protein 561	2.6	8.55	0.7	5.2	0.0114	0	0.274594
ENSG00000111142	METAP2	methionyl aminopeptidase 2	-1.4	8.55	-3.1	-0.4	0.0114	0	0.274271
ENSG00000125447	GGA3	golgi-associated, gamma adaptin ear containing, ARF binding protein 3	-1.9	8.55	-4.1	-0.5	0.0114	0	0.273948
ENSG00000130402	ACTN4	actinin, alpha 4	1.5	8.55	0.5	3.4	0.0114	0	0.273627
ENSG00000188393	CLEC2A	C-type lectin domain family 2, member A	-1.5	8.55	-3.2	-0.4	0.0114	0	0.273306
ENSG00000259202	RP11-342M21.2	N/A	2	8.54	0.6	4.4	0.0114	0	0.272986
ENSG00000255940	REXO1L10P	REX1, RNA exonuclease 1 homolog (S. cerevisiae)-like 10, pseudogene	4.6	8.54	2.3	10.6	0.0114	0	0.272667
ENSG00000162851	TFB2M	transcription factor B2, mitochondrial	-1.4	8.53	-3.2	-0.4	0.0115	0	0.274737
ENSG00000179922	ZNF784	zinc finger protein 784	2.3	8.53	0.7	5.2	0.0115	0	0.274417
ENSG00000090612	ZNF268	zinc finger protein 268	-2	8.52	-4.8	-0.5	0.0115	0	0.274097
ENSG00000198946	SSX4B	synovial sarcoma, X breakpoint 4B	-1.5	8.5	-3.5	-0.3	0.0116	0	0.276158
ENSG00000090054	SPTLC1	serine palmitoyltransferase, long chain base subunit 1	2.7	8.5	0.7	5.4	0.0116	0	0.275837
ENSG00000185246	PRPF39	pre-mRNA processing factor 39	4.8	8.48	2	11	0.0116	0	0.275517
ENSG00000256087	ZNF432	zinc finger protein 432	1.8	8.48	0.5	3.5	0.0116	0	0.275197
ENSG00000155367	PPM1J	protein phosphatase, Mg2+/Mn2+ dependent, 1J	-1.7	8.47	-3.7	-0.4	0.0117	0	0.277248
ENSG00000188056	TREML4	triggering receptor expressed on myeloid cells-like 4	5	8.46	2.2	11	0.0117	0	0.276927
ENSG00000131269	ABCB7	ATP-binding cassette, sub-family B (MDR/TAP), member 7	2.7	8.45	0.8	6.1	0.0118	0	0.278971
ENSG00000167565	SERTAD3	SERTA domain containing 3	1.8	8.45	0.5	3.6	0.0118	0	0.278649
ENSG00000086062	B4GALT1	UDP-Gal:betaGlcNAc beta 1,4- galactosyltransferase, polypeptide 1	-1.7	8.45	-3.6	-0.4	0.0118	0	0.278328
ENSG00000142208	AKT1	v-akt murine thymoma viral oncogene homolog 1	-2.1	8.44	-5.2	-0.3	0.0118	0	0.278007
ENSG00000089053	ANAPC5	anaphase promoting complex subunit 5	-1.7	8.44	-3.8	-0.4	0.0118	0	0.277687
ENSG00000162711	NLRP3	NLR family, pyrin domain containing 3	2.1	8.44	0.6	4.2	0.0118	0	0.277368
ENSG00000189241	TSPYL1	TSPY-like 1	-1.5	8.44	-3	-0.5	0.0118	0	0.277049
ENSG00000169692	AGPAT2	1-acylglycerol-3-phosphate O-acyltransferase 2	2.6	8.44	0.6	5.8	0.0118	0	0.276732
ENSG00000165802	NSMF	NMDA receptor synaptonuclear signaling and neuronal migration factor	2.1	8.43	0.5	5.4	0.0118	0	0.276415
ENSG00000211713	TRBV6-4	T cell receptor beta variable 6-4	2.8	8.43	-1.4	9	0.0118	0	0.276098
ENSG00000069956	MAPK6	mitogen-activated protein kinase 6	2.3	8.43	0.6	4.8	0.0118	0	0.275783
ENSG00000145354	CISD2	CDGSH iron sulfur domain 2	2.1	8.43	0.5	4.2	0.0118	0	0.275468
ENSG00000197483	ZNF628	zinc finger protein 628	1.8	8.42	0.5	4.4	0.0119	0	0.277486
ENSG00000187735	TCEA1	transcription elongation factor A (SII), 1	-2.3	8.42	-4.9	-0.6	0.0119	0	0.27717
ENSG00000251493	FOXD1	forkhead box D1	-1.8	8.42	-4.1	-0.5	0.0119	0	0.276854
ENSG00000151725	CENPU	centromere protein U	-2	8.42	-4.5	-0.6	0.0119	0	0.27654
ENSG00000090238	YPEL3	yippee-like 3 (Drosophila)	-1.9	8.41	-4.6	-0.6	0.0119	0	0.276226
ENSG00000142528	ZNF473	zinc finger protein 473	2.7	8.41	0.6	6.2	0.0119	0	0.275913
ENSG00000068308	OTUD5	OTU deubiquitinase 5	1.7	8.41	0.5	3.8	0.0119	0	0.2756
ENSG00000170899	GSTA4	glutathione S-transferase alpha 4	3.1	8.41	0.9	7	0.0119	0	0.275288
ENSG00000263053	RP11-1055B8.6	N/A	5.1	8.4	2.6	10.8	0.0119	0	0.274977
ENSG00000169957	ZNF768	zinc finger protein 768	2.9	8.4	0.7	7.6	0.0119	0	0.274667
ENSG00000140943	MBTPS1	membrane-bound transcription factor peptidase, site 1	2.2	8.4	0.6	4.7	0.0119	0	0.274357
ENSG00000160408	ST6GALNAC6	ST6 (alpha-N-acetyl-neuraminyl-2,3-beta-galactosyl-1,3)-N-acetylgalactosaminide alpha-2,6-sialyltransferase 6	-1.5	8.39	-5	-0.4	0.012	0	0.276351
ENSG00000189186	DCAF8L2	DDB1 and CUL4 associated factor 8-like 2	-1.7	8.39	-3.8	-0.4	0.012	0	0.27604
ENSG00000222000	AC092675.3	N/A	2.2	8.39	0.5	4.7	0.012	0	0.27573
ENSG00000167476	JSRP1	junctional sarcoplasmic reticulum protein 1	3	8.38	0.7	7.2	0.012	0	0.275421
ENSG00000268852	AC132872.2	N/A	2.1	8.38	0.5	4.4	0.012	0	0.275112
ENSG00000183597	TANGO2	transport and golgi organization 2 homolog (Drosophila)	-1.8	8.37	-4	-0.5	0.012	0	0.274804
ENSG00000170128	GPR25	G protein-coupled receptor 25	2.4	8.37	0.7	4.8	0.012	0	0.274497
ENSG00000180869	C1ORF180	chromosome 1 open reading frame 180	2.5	8.35	0.6	5	0.0121	0	0.276475
ENSG00000268628	AL121761.2	N/A	4.6	8.33	1.3	8.8	0.0122	0	0.278449
ENSG00000136231	IGF2BP3	insulin-like growth factor 2 mRNA binding protein 3	5	8.32	-1	11	0.0122	0	0.278138
ENSG00000143549	TPM3	tropomyosin 3	2.8	8.32	0.8	5.7	0.0122	0	0.277829
ENSG00000197841	ZNF181	zinc finger protein 181	2.9	8.32	0.7	5.9	0.0122	0	0.277519
ENSG00000181031	RPH3AL	rabphilin 3A-like (without C2 domains)	2	8.3	0.5	4.3	0.0123	0	0.279483
ENSG00000141564	RPTOR	regulatory associated protein of MTOR, complex 1	2.1	8.29	0.7	5.2	0.0123	0	0.279173
ENSG00000104517	UBR5	ubiquitin protein ligase E3 component n-recognin 5	1.7	8.29	0.5	3.5	0.0123	0	0.278864
ENSG00000108848	LUC7L3	LUC7-like 3 (S. cerevisiae)	3.1	8.29	1.1	6.9	0.0123	0	0.278555
ENSG00000180919	OR56B4	olfactory receptor, family 56, subfamily B, member 4	-2.1	8.29	-4.5	-0.5	0.0123	0	0.278247
ENSG00000211776	TRAV2	T cell receptor alpha variable 2	4	8.29	0.8	8.1	0.0123	0	0.277939
ENSG00000185100	ADSSL1	adenylosuccinate synthase like 1	-1.9	8.28	-4.5	-0.4	0.0124	0	0.27989
ENSG00000038210	PI4K2B	phosphatidylinositol 4-kinase type 2 beta	-2	8.28	-4.5	-0.5	0.0124	0	0.279581
ENSG00000132330	SCLY	selenocysteine lyase	-1.5	8.28	-3.2	-0.4	0.0124	0	0.279273
ENSG00000169857	AVEN	apoptosis, caspase activation inhibitor	-1.9	8.28	-4	-0.5	0.0124	0	0.278966
ENSG00000090674	MCOLN1	mucolipin 1	1.7	8.28	0.4	4.6	0.0124	0	0.278659
ENSG00000143376	SNX27	sorting nexin family member 27	1.4	8.28	0.4	2.9	0.0124	0	0.278353
ENSG00000167004	PDIA3	protein disulfide isomerase family A, member 3	3.7	8.27	1.4	7.1	0.0124	0	0.278048
ENSG00000101972	STAG2	stromal antigen 2	1.6	8.26	0.5	3.5	0.0124	0	0.277744
ENSG00000163630	SYNPR	synaptoporin	1.9	8.26	0.5	4.3	0.0124	0	0.27744
ENSG00000089116	LHX5	LIM homeobox 5	-1.8	8.26	-3.9	-0.4	0.0124	0	0.277137
ENSG00000185274	WBSCR17	Williams-Beuren syndrome chromosome region 17	1.9	8.25	0.4	4.1	0.0125	0	0.279067
ENSG00000169884	WNT10B	wingless-type MMTV integration site family, member 10B	-2.2	8.25	-5.1	-0.5	0.0125	0	0.278762
ENSG00000203909	DPPA5	developmental pluripotency associated 5	2.2	8.25	0.6	5	0.0125	0	0.278459
ENSG00000161551	ZNF577	zinc finger protein 577	2.9	8.24	-0.8	8	0.0125	0	0.278156
ENSG00000160801	PTH1R	parathyroid hormone 1 receptor	4.7	8.24	1.1	9.2	0.0125	0	0.277853
ENSG00000136448	NMT1	N-myristoyltransferase 1	4.3	8.24	-2.5	10	0.0125	0	0.277552
ENSG00000198783	ZNF830	zinc finger protein 830	2.2	8.23	0.6	4.8	0.0125	0	0.277251
ENSG00000112306	RPS12	ribosomal protein S12	4.4	8.22	2.2	9.9	0.0126	0	0.279166
ENSG00000248919	ATP5J2-PTCD1	ATP5J2-PTCD1 readthrough	4.9	8.22	2.3	10.5	0.0126	0	0.278864
ENSG00000111247	RAD51AP1	RAD51 associated protein 1	2.7	8.22	0.5	5.7	0.0126	0	0.278562
ENSG00000157193	LRP8	low density lipoprotein receptor-related protein 8, apolipoprotein e receptor	-2	8.22	-4.5	-0.5	0.0126	0	0.278261
ENSG00000175040	CHST2	carbohydrate (N-acetylglucosamine-6-O) sulfotransferase 2	3.2	8.21	0.7	6.8	0.0126	0	0.277961
ENSG00000171503	ETFDH	electron-transferring-flavoprotein dehydrogenase	-1.5	8.21	-3.3	-0.4	0.0126	0	0.277662
ENSG00000228008	CTD-2330K9.3	N/A	4	8.21	1	9	0.0126	0	0.277363
ENSG00000114391	RPL24	ribosomal protein L24	3.2	8.2	1	7.4	0.0126	0	0.277065
ENSG00000178093	TSSK6	testis-specific serine kinase 6	2.1	8.2	0.6	5.6	0.0126	0	0.276767
ENSG00000101132	PFDN4	prefoldin subunit 4	-1.8	8.19	-4.7	-0.4	0.0127	0	0.278664
ENSG00000117215	PLA2G2D	phospholipase A2, group IID	1.9	8.19	0.4	4.4	0.0127	0	0.278365
ENSG00000142233	NTN5	netrin 5	2.1	8.18	0.6	4.9	0.0127	0	0.278067
ENSG00000124251	TP53TG5	TP53 target 5	2.7	8.18	0.5	6.6	0.0127	0	0.27777
ENSG00000092009	CMA1	chymase 1, mast cell	2.1	8.18	0.6	4.8	0.0127	0	0.277473
ENSG00000198721	ECI2	enoyl-CoA delta isomerase 2	3.2	8.17	1	6.8	0.0128	0	0.27936
ENSG00000138231	DBR1	debranching RNA lariats 1	3.3	8.16	1.2	7.7	0.0128	0	0.279062
ENSG00000269175	AC093157.1	N/A	4.2	8.16	1.6	8.5	0.0128	0	0.278765
ENSG00000234511	C5ORF58	chromosome 5 open reading frame 58	-1.5	8.15	-3.5	-0.4	0.0128	0	0.278468
ENSG00000196843	ARID5A	AT rich interactive domain 5A (MRF1-like)	-1.9	8.15	-4.2	-0.4	0.0128	0	0.278172
ENSG00000134452	FBXO18	F-box protein, helicase, 18	1.6	8.15	0.4	3.4	0.0128	0	0.277877
ENSG00000100722	ZC3H14	zinc finger CCCH-type containing 14	-2.4	8.14	-4.9	-0.5	0.0129	0	0.279751
ENSG00000163701	IL17RE	interleukin 17 receptor E	1.7	8.14	0.5	3.9	0.0129	0	0.279454
ENSG00000100365	NCF4	neutrophil cytosolic factor 4, 40kDa	3.7	8.14	0.9	8.4	0.0129	0	0.279159
ENSG00000184140	OR4F6	olfactory receptor, family 4, subfamily F, member 6	3	8.14	0.9	7.2	0.0129	0	0.278864
ENSG00000163009	C2ORF48	chromosome 2 open reading frame 48	2.6	8.13	0.5	5.7	0.0129	0	0.278569
ENSG00000120332	TNN	tenascin N	2.4	8.12	0.6	5.8	0.013	0	0.280432
ENSG00000213551	DNAJC9	DnaJ (Hsp40) homolog, subfamily C, member 9	4.4	8.12	2.1	10.6	0.013	0	0.280137
ENSG00000109079	TNFAIP1	tumor necrosis factor, alpha-induced protein 1 (endothelial)	3.1	8.11	0.9	7.4	0.013	0	0.279842
ENSG00000198668	CALM1	calmodulin 1 (phosphorylase kinase, delta)	-2.6	8.11	-5.8	-0.5	0.013	0	0.279548
ENSG00000139835	GRTP1	growth hormone regulated TBC protein 1	1.9	8.11	0.3	5.5	0.013	0	0.279254
ENSG00000031691	CENPQ	centromere protein Q	-1.8	8.1	-4	-0.4	0.0131	0	0.281107
ENSG00000111913	FAM65B	family with sequence similarity 65, member B	1.6	8.1	0.5	4.5	0.0131	0	0.280812
ENSG00000133789	SWAP70	SWAP switching B-cell complex 70kDa subunit	2.4	8.1	-0.9	8.6	0.0131	0	0.280518
ENSG00000169180	XPO6	exportin 6	-1.8	8.09	-3.7	-0.5	0.0131	0	0.280225
ENSG00000134824	FADS2	fatty acid desaturase 2	1.9	8.09	0.5	4.5	0.0131	0	0.279932
ENSG00000005882	PDK2	pyruvate dehydrogenase kinase, isozyme 2	1.9	8.08	0.5	4.2	0.0131	0	0.27964
ENSG00000205129	C4ORF47	chromosome 4 open reading frame 47	1.8	8.08	0.4	4.6	0.0131	0	0.279348
ENSG00000136297	MMD2	Miyoshi muscular dystrophy 2	-2	8.07	-4.3	-0.4	0.0132	0	0.281188
ENSG00000111087	GLI1	GLI family zinc finger 1	3.2	8.07	0.9	6.3	0.0132	0	0.280895
ENSG00000269514	DKFZP779L1853	uncharacterized LOC643162	2	8.07	0.4	4.8	0.0132	0	0.280603
ENSG00000105329	TGFB1	transforming growth factor, beta 1	1.9	8.07	0.4	4.3	0.0132	0	0.280312
ENSG00000240849	TMEM189	transmembrane protein 189	1.7	8.06	0.4	3.3	0.0132	0	0.280021
ENSG00000211899	IGHM	immunoglobulin heavy constant mu	3.6	8.06	1.1	7.7	0.0132	0	0.279731
ENSG00000185960	SHOX	short stature homeobox	-1.9	8.06	-4.3	-0.4	0.0132	0	0.279441
ENSG00000206384	COL6A6	collagen, type VI, alpha 6	-1.8	8.06	-3.9	-0.4	0.0132	0	0.279152
ENSG00000084652	TXLNA	taxilin alpha	2	8.06	0.5	4.3	0.0132	0	0.278864
ENSG00000164082	GRM2	glutamate receptor, metabotropic 2	3.1	8.06	0.6	6.7	0.0132	0	0.278576
ENSG00000095066	HOOK2	hook microtubule-tethering protein 2	1.9	8.06	0.4	4.2	0.0132	0	0.278289
ENSG00000160209	PDXK	pyridoxal (pyridoxine, vitamin B6) kinase	3.9	8.05	1.5	10	0.0132	0	0.278002
ENSG00000197927	C2ORF27A	chromosome 2 open reading frame 27A	2.2	8.04	0.6	5.2	0.0133	0	0.27982
ENSG00000158480	SPATA2	spermatogenesis associated 2	-1.3	8.04	-3	-0.4	0.0133	0	0.279532
ENSG00000104321	TRPA1	transient receptor potential cation channel, subfamily A, member 1	-2	8.03	-4.8	-0.5	0.0133	0	0.279245
ENSG00000156931	VPS8	vacuolar protein sorting 8 homolog (S. cerevisiae)	-1.7	8.02	-3.7	-0.4	0.0134	0	0.281056
ENSG00000211460	TSN	translin	-2.4	8.02	-5.3	-0.5	0.0134	0	0.280768
ENSG00000231274	SBK3	SH3 domain binding kinase family, member 3	2.4	8.02	0.6	5	0.0134	0	0.280481
ENSG00000169762	TAPT1	transmembrane anterior posterior transformation 1	2.4	8.01	0.6	5.1	0.0134	0	0.280194
ENSG00000174669	SLC29A2	solute carrier family 29 (equilibrative nucleoside transporter), member 2	2.8	8.01	0.7	7.5	0.0134	0	0.279908
ENSG00000183038	GGTLC3	gamma-glutamyltransferase light chain 3	3.9	8	0.7	8.6	0.0135	0	0.281709
ENSG00000120685	PROSER1	proline and serine rich 1	1.5	8	0.4	4	0.0135	0	0.281422
ENSG00000221983	UBA52	ubiquitin A-52 residue ribosomal protein fusion product 1	3.7	8	1.1	8	0.0135	0	0.281135
ENSG00000174744	BRMS1	breast cancer metastasis suppressor 1	-1.7	7.99	-4.8	1.2	0.0135	0	0.280849
ENSG00000211791	TRAV13-2	T cell receptor alpha variable 13-2	1.9	7.99	0.7	4.3	0.0135	0	0.280564
ENSG00000143437	ARNT	aryl hydrocarbon receptor nuclear translocator	-2.7	7.98	-5.9	-0.6	0.0136	0	0.282355
ENSG00000105538	RASIP1	Ras interacting protein 1	2.3	7.98	0.5	4.9	0.0136	0	0.282069
ENSG00000173542	MOB1B	MOB kinase activator 1B	1.9	7.98	0.5	5.2	0.0136	0	0.281783
ENSG00000140992	PDPK1	3-phosphoinositide dependent protein kinase 1	5	7.98	2.8	10	0.0136	0	0.281498
ENSG00000073969	NSF	N-ethylmaleimide-sensitive factor	3.2	7.98	1	7.9	0.0136	0	0.281213
ENSG00000064218	DMRT3	doublesex and mab-3 related transcription factor 3	2.5	7.98	0.5	5.8	0.0136	0	0.280929
ENSG00000122482	ZNF644	zinc finger protein 644	2.2	7.97	0.5	4.6	0.0136	0	0.280646
ENSG00000171408	PDE7B	phosphodiesterase 7B	2.9	7.97	0.6	6.6	0.0136	0	0.280363
ENSG00000165323	FAT3	FAT atypical cadherin 3	2.1	7.96	0.5	4.2	0.0137	0	0.28214
ENSG00000198657	OR8B4	olfactory receptor, family 8, subfamily B, member 4	2.3	7.96	0.6	5.3	0.0137	0	0.281856
ENSG00000211751	TRBV25-1	T cell receptor beta variable 25-1	2.2	7.96	0.5	4.6	0.0137	0	0.281573
ENSG00000125818	PSMF1	proteasome (prosome, macropain) inhibitor subunit 1 (PI31)	2.5	7.95	0.6	5.9	0.0137	0	0.28129
ENSG00000043355	ZIC2	Zic family member 2	3.2	7.95	0.8	6.5	0.0137	0	0.281008
ENSG00000106976	DNM1	dynamin 1	-1.8	7.95	-4.2	-0.4	0.0137	0	0.280726
ENSG00000111981	ULBP1	UL16 binding protein 1	1.7	7.94	0.4	3.7	0.0138	0	0.282492
ENSG00000128016	ZFP36	ZFP36 ring finger protein	2.4	7.94	0.5	6.9	0.0138	0	0.28221
ENSG00000197766	CFD	complement factor D (adipsin)	2.5	7.94	0.7	6.4	0.0138	0	0.281928
ENSG00000166887	VPS39	vacuolar protein sorting 39 homolog (S. cerevisiae)	2.2	7.94	0.6	5.4	0.0138	0	0.281647
ENSG00000080573	COL5A3	collagen, type V, alpha 3	2.2	7.94	0.4	5.8	0.0138	0	0.281366
ENSG00000166741	NNMT	nicotinamide N-methyltransferase	1.9	7.94	0.4	4.1	0.0138	0	0.281086
ENSG00000254901	MEF2BNB	MEF2B neighbor	1.6	7.93	0.4	4.5	0.0138	0	0.280806
ENSG00000164900	GBX1	gastrulation brain homeobox 1	2.5	7.93	0.5	5.2	0.0138	0	0.280527
ENSG00000185565	LSAMP	limbic system-associated membrane protein	3.8	7.93	1.5	7.5	0.0138	0	0.280248
ENSG00000189077	TMEM120A	transmembrane protein 120A	2.9	7.93	0.9	6.5	0.0138	0	0.27997
ENSG00000124232	RBPJL	recombination signal binding protein for immunoglobulin kappa J region-like	1.9	7.91	0.4	4.3	0.0139	0	0.28172
ENSG00000128710	HOXD10	homeobox D10	-1.9	7.9	-4.2	-0.4	0.0139	0	0.281441
ENSG00000106125	FAM188B	family with sequence similarity 188, member B	-1.8	7.9	-4.1	-0.4	0.0139	0	0.281162
ENSG00000259494	MRPL46	mitochondrial ribosomal protein L46	-1.6	7.9	-3.7	-0.3	0.0139	0	0.280884
ENSG00000119787	ATL2	atlastin GTPase 2	2.5	7.89	0.6	5.4	0.014	0	0.282626
ENSG00000160124	CCDC58	coiled-coil domain containing 58	2.6	7.89	0.7	7.5	0.014	0	0.282347
ENSG00000148356	LRSAM1	leucine rich repeat and sterile alpha motif containing 1	-2.3	7.88	-4.9	-0.5	0.014	0	0.282069
ENSG00000131873	CHSY1	chondroitin sulfate synthase 1	2.1	7.87	0.5	4.9	0.0141	0	0.283804
ENSG00000241973	PI4KA	phosphatidylinositol 4-kinase, catalytic, alpha	3.7	7.87	1.1	7.9	0.0141	0	0.283525
ENSG00000196689	TRPV1	transient receptor potential cation channel, subfamily V, member 1	-1.7	7.86	-4.7	-0.4	0.0141	0	0.283247
ENSG00000090905	TNRC6A	trinucleotide repeat containing 6A	-1.7	7.85	-3.7	-0.4	0.0142	0	0.284975
ENSG00000100362	PVALB	parvalbumin	-2.2	7.84	-5	-0.4	0.0142	0	0.284696
ENSG00000150681	RGS18	regulator of G-protein signaling 18	1.7	7.84	0.5	4	0.0142	0	0.284417
ENSG00000151655	ITIH2	inter-alpha-trypsin inhibitor heavy chain 2	2.2	7.84	0.5	4.8	0.0142	0	0.284139
ENSG00000179178	TMEM125	transmembrane protein 125	-1.7	7.81	-3.5	-0.4	0.0144	0	0.287859
ENSG00000171587	DSCAM	Down syndrome cell adhesion molecule	4.6	7.81	0.8	8.6	0.0144	0	0.287578
ENSG00000232869	TRBV29-1	T cell receptor beta variable 29-1	-1.9	7.81	-5.2	-0.2	0.0144	0	0.287298
ENSG00000165891	E2F7	E2F transcription factor 7	1.4	7.81	0.3	3.2	0.0144	0	0.287018
ENSG00000105679	GAPDHS	glyceraldehyde-3-phosphate dehydrogenase, spermatogenic	2.4	7.8	0.6	5.3	0.0144	0	0.286738
ENSG00000065308	TRAM2	translocation associated membrane protein 2	1.9	7.8	0.4	4.1	0.0144	0	0.286459
ENSG00000127334	DYRK2	dual-specificity tyrosine-(Y)-phosphorylation regulated kinase 2	2.2	7.8	0.4	4.6	0.0144	0	0.286181
ENSG00000108961	RANGRF	RAN guanine nucleotide release factor	3	7.8	0.7	7.4	0.0144	0	0.285903
ENSG00000138311	ZNF365	zinc finger protein 365	4.1	7.79	0.9	9.4	0.0145	0	0.287609
ENSG00000124243	BCAS4	breast carcinoma amplified sequence 4	2.6	7.78	0.8	5.8	0.0145	0	0.28733
ENSG00000181019	NQO1	NAD(P)H dehydrogenase, quinone 1	2.7	7.78	0.6	6.2	0.0145	0	0.287052
ENSG00000160199	PKNOX1	PBX/knotted 1 homeobox 1	1.6	7.78	0.5	4	0.0145	0	0.286775
ENSG00000156599	ZDHHC5	zinc finger, DHHC-type containing 5	-1.9	7.77	-4.3	-0.4	0.0146	0	0.288473
ENSG00000162814	SPATA17	spermatogenesis associated 17	1.7	7.77	0.4	4.1	0.0146	0	0.288195
ENSG00000204887	KRTAP1-4	keratin associated protein 1-4	-2.2	7.76	-5.2	-0.3	0.0146	0	0.287917
ENSG00000157020	SEC13	SEC13 homolog (S. cerevisiae)	2.4	7.76	0.5	5.7	0.0146	0	0.28764
ENSG00000167825	OR5I1	olfactory receptor, family 5, subfamily I, member 1	-1.9	7.76	-4.5	-0.4	0.0146	0	0.287363
ENSG00000152382	TADA1	transcriptional adaptor 1	2.2	7.75	0.4	4.8	0.0147	0	0.289053
ENSG00000188760	TMEM198	transmembrane protein 198	4.4	7.74	1.2	9.9	0.0147	0	0.288775
ENSG00000129993	CBFA2T3	core-binding factor, runt domain, alpha subunit 2; translocated to, 3	-1.8	7.73	-3.8	-0.4	0.0147	0	0.288498
ENSG00000146066	HIGD2A	HIG1 hypoxia inducible domain family, member 2A	2	7.72	0.2	5.2	0.0148	0	0.290182
ENSG00000172139	SLC9C1	solute carrier family 9, subfamily C (Na+-transporting carboxylic acid decarboxylase), member 1	-1.5	7.72	-4.2	-0.4	0.0148	0	0.289904
ENSG00000196420	S100A5	S100 calcium binding protein A5	2.8	7.72	0.8	6	0.0148	0	0.289627
ENSG00000154734	ADAMTS1	ADAM metallopeptidase with thrombospondin type 1 motif, 1	2.6	7.72	0.5	5.9	0.0148	0	0.28935
ENSG00000075290	WNT8B	wingless-type MMTV integration site family, member 8B	-2.6	7.72	-5.7	-0.5	0.0148	0	0.289074
ENSG00000127564	PKMYT1	protein kinase, membrane associated tyrosine/threonine 1	4.7	7.7	2.2	10.4	0.0149	0	0.290749
ENSG00000114030	KPNA1	karyopherin alpha 1 (importin alpha 5)	-2.4	7.7	-5.6	-0.6	0.0149	0	0.290472
ENSG00000165283	STOML2	stomatin (EPB72)-like 2	-1.8	7.7	-4.5	-0.4	0.0149	0	0.290195
ENSG00000120903	CHRNA2	cholinergic receptor, nicotinic, alpha 2 (neuronal)	-2.2	7.7	-5.5	-0.4	0.0149	0	0.289919
ENSG00000142687	KIAA0319L	KIAA0319-like	1.7	7.7	0.4	3.8	0.0149	0	0.289644
ENSG00000214456	PLIN5	perilipin 5	3.1	7.7	1	6.5	0.0149	0	0.289368
ENSG00000123643	SLC36A1	solute carrier family 36 (proton/amino acid symporter), member 1	1.8	7.7	0.4	3.9	0.0149	0	0.289094
ENSG00000198925	ATG9A	autophagy related 9A	3.6	7.68	-1	8	0.015	0	0.290758
ENSG00000230873	STMND1	stathmin domain containing 1	2.6	7.68	0.6	5.2	0.015	0	0.290483
ENSG00000197364	S100A7L2	S100 calcium binding protein A7-like 2	-1.6	7.68	-4.3	3.2	0.015	0	0.290208
ENSG00000187239	FNBP1	formin binding protein 1	-1.6	7.68	-3.7	-0.3	0.015	0	0.289934
ENSG00000141458	NPC1	Niemann-Pick disease, type C1	1.8	7.68	0.4	4.7	0.015	0	0.28966
ENSG00000108439	PNPO	pyridoxamine 5'-phosphate oxidase	2.4	7.67	0.6	6.7	0.015	0	0.289387
ENSG00000206418	RAB12	RAB12, member RAS oncogene family	1.8	7.67	0.3	4.4	0.015	0	0.289114
ENSG00000109736	MFSD10	major facilitator superfamily domain containing 10	-1.8	7.66	-4.2	-0.4	0.0151	0	0.290767
ENSG00000164032	H2AFZ	H2A histone family, member Z	2.8	7.65	0.6	6.8	0.0152	0	0.292418
ENSG00000153266	FEZF2	FEZ family zinc finger 2	3.2	7.64	0.5	8.2	0.0152	0	0.292143
ENSG00000180198	RCC1	regulator of chromosome condensation 1	4.2	7.63	1.9	9.9	0.0153	0	0.293789
ENSG00000138115	CYP2C8	cytochrome P450, family 2, subfamily C, polypeptide 8	3.3	7.63	0.9	10.3	0.0153	0	0.293513
ENSG00000102878	HSF4	heat shock transcription factor 4	-2	7.62	-4.4	-0.4	0.0153	0	0.293238
ENSG00000168275	COA6	cytochrome c oxidase assembly factor 6 homolog (S. cerevisiae)	1.9	7.62	0.4	4.2	0.0153	0	0.292963
ENSG00000152520	PAN3	PAN3 poly(A) specific ribonuclease subunit	1.4	7.61	0.2	3.4	0.0154	0	0.294602
ENSG00000269089	AP003733.1	N/A	2.9	7.61	-0.5	8	0.0154	0	0.294327
ENSG00000001631	KRIT1	KRIT1, ankyrin repeat containing	-1.7	7.61	-3.7	-0.3	0.0154	0	0.294052
ENSG00000163283	ALPP	alkaline phosphatase, placental	-2.7	7.6	-6.6	-0.4	0.0154	0	0.293778
ENSG00000120885	CLU	clusterin	3.2	7.6	0.6	7.6	0.0154	0	0.293504
ENSG00000131069	ACSS2	acyl-CoA synthetase short-chain family member 2	-1.8	7.6	-4.7	-0.3	0.0154	0	0.293231
ENSG00000169919	GUSB	glucuronidase, beta	-1.7	7.6	-4	-0.3	0.0154	0	0.292958
ENSG00000120688	WBP4	WW domain binding protein 4	1.9	7.6	0.4	3.6	0.0154	0	0.292686
ENSG00000137812	CASC5	cancer susceptibility candidate 5	-1.9	7.59	-4.5	-0.3	0.0155	0	0.294313
ENSG00000112799	LY86	lymphocyte antigen 86	2.3	7.59	0.4	5.1	0.0155	0	0.29404
ENSG00000189252	SPANXN3	SPANX family, member N3	2.6	7.59	0.5	5.7	0.0155	0	0.293767
ENSG00000053438	NNAT	neuronatin	2.4	7.59	0.5	5	0.0155	0	0.293495
ENSG00000011600	TYROBP	TYRO protein tyrosine kinase binding protein	1.6	7.59	0.3	3.5	0.0155	0	0.293224
ENSG00000152580	IGSF10	immunoglobulin superfamily, member 10	2.2	7.58	0.4	4.8	0.0155	0	0.292953
ENSG00000108342	CSF3	colony stimulating factor 3 (granulocyte)	2	7.58	0.4	5.2	0.0155	0	0.292682
ENSG00000181617	FDCSP	follicular dendritic cell secreted protein	-1.9	7.58	-4.7	-0.4	0.0155	0	0.292412
ENSG00000183307	CECR6	cat eye syndrome chromosome region, candidate 6	2	7.57	0.4	4.6	0.0156	0	0.294028
ENSG00000103540	CCP110	centriolar coiled coil protein 110kDa	-1.7	7.56	-3.9	-0.3	0.0157	0	0.29564
ENSG00000267561	RP5-1052I5.2	N/A	4.2	7.56	1.9	9	0.0157	0	0.295368
ENSG00000163032	VSNL1	visinin-like 1	2.6	7.55	0.6	4.9	0.0157	0	0.295097
ENSG00000135932	CAB39	calcium binding protein 39	2.3	7.55	0.2	6.6	0.0157	0	0.294826
ENSG00000204542	C6ORF15	chromosome 6 open reading frame 15	2.8	7.55	0.5	6.3	0.0157	0	0.294555
ENSG00000223572	CKMT1A	creatine kinase, mitochondrial 1A	2.3	7.55	0.4	5	0.0157	0	0.294285
ENSG00000171124	FUT3	fucosyltransferase 3 (galactoside 3(4)-L-fucosyltransferase, Lewis blood group)	4.2	7.55	1.2	9.1	0.0157	0	0.294016
ENSG00000185129	PURA	purine-rich element binding protein A	-1.5	7.55	-3.4	-0.3	0.0157	0	0.293747
ENSG00000127946	HIP1	huntingtin interacting protein 1	-2.3	7.54	-5.5	-0.5	0.0158	0	0.295347
ENSG00000179750	APOBEC3B	apolipoprotein B mRNA editing enzyme, catalytic polypeptide-like 3B	-1.6	7.54	-4.8	-0.1	0.0158	0	0.295078
ENSG00000142156	COL6A1	collagen, type VI, alpha 1	2.1	7.53	0.4	4.8	0.0158	0	0.294808
ENSG00000185294	SPPL2C	signal peptide peptidase like 2C	-3.4	7.53	-7.4	-0.9	0.0158	0	0.29454
ENSG00000108773	KAT2A	K(lysine) acetyltransferase 2A	2.2	7.53	0.4	5.2	0.0158	0	0.294271
ENSG00000099804	CDC34	cell division cycle 34	-1.9	7.53	-5.6	-0.1	0.0158	0	0.294004
ENSG00000188542	DUSP28	dual specificity phosphatase 28	1.9	7.52	0.3	4.1	0.0159	0	0.295595
ENSG00000168872	DDX19A	DEAD (Asp-Glu-Ala-Asp) box polypeptide 19A	2.2	7.52	0.6	4.5	0.0159	0	0.295327
ENSG00000086619	ERO1LB	ERO1-like beta (S. cerevisiae)	-1.7	7.51	-3.9	-0.4	0.0159	0	0.295059
ENSG00000008438	PGLYRP1	peptidoglycan recognition protein 1	2.9	7.51	0.6	6.4	0.0159	0	0.294791
ENSG00000143858	SYT2	synaptotagmin II	4.2	7.51	1.3	9.1	0.0159	0	0.294524
ENSG00000168412	MTNR1A	melatonin receptor 1A	4.4	7.51	1.6	10.3	0.0159	0	0.294258
ENSG00000105514	RAB3D	RAB3D, member RAS oncogene family	3.2	7.51	0.9	7.6	0.0159	0	0.293992
ENSG00000211784	TRAV10	T cell receptor alpha variable 10	-1.7	7.51	-3.8	-0.4	0.0159	0	0.293726
ENSG00000124490	CRISP2	cysteine-rich secretory protein 2	4.6	7.5	1.7	10.5	0.016	0	0.295307
ENSG00000088356	PDRG1	p53 and DNA-damage regulated 1	-2.2	7.5	-5.1	-0.6	0.016	0	0.295041
ENSG00000143771	CNIH4	cornichon family AMPA receptor auxiliary protein 4	-2	7.5	-4.5	-0.4	0.016	0	0.294775
ENSG00000179626	OR6C4	olfactory receptor, family 6, subfamily C, member 4	4.9	7.5	2.1	10.5	0.016	0	0.294509
ENSG00000259024	TVP23C-CDRT4	TVP23C-CDRT4 readthrough	2.2	7.49	0.5	5.5	0.016	0	0.294245
ENSG00000131019	ULBP3	UL16 binding protein 3	4.8	7.49	1.4	11	0.016	0	0.29398
ENSG00000211851	TRAJ38	T cell receptor alpha joining 38	2.6	7.49	1.2	6.8	0.016	0	0.293716
ENSG00000197769	MAP1LC3C	microtubule-associated protein 1 light chain 3 gamma	-1.7	7.48	-4.2	-0.3	0.0161	0	0.295287
ENSG00000099797	TECR	trans-2,3-enoyl-CoA reductase	1.7	7.48	0.3	4.2	0.0161	0	0.295022
ENSG00000100906	NFKBIA	nuclear factor of kappa light polypeptide gene enhancer in B-cells inhibitor, alpha	-1.4	7.48	-3.3	-0.2	0.0161	0	0.294758
ENSG00000127947	PTPN12	protein tyrosine phosphatase, non-receptor type 12	-1.5	7.47	-4	-0.3	0.0161	0	0.294495
ENSG00000113391	FAM172A	family with sequence similarity 172, member A	3.3	7.47	0.7	7.3	0.0161	0	0.294231
ENSG00000145050	MANF	mesencephalic astrocyte-derived neurotrophic factor	-2.1	7.47	-5	-0.5	0.0161	0	0.293969
ENSG00000140795	MYLK3	myosin light chain kinase 3	-1.6	7.47	-3.7	-0.3	0.0161	0	0.293707
ENSG00000175414	ARL10	ADP-ribosylation factor-like 10	-1.8	7.47	-4.3	-0.4	0.0161	0	0.293445
ENSG00000128739	SNRPN	small nuclear ribonucleoprotein polypeptide N	-2.1	7.46	-5.4	-0.5	0.0162	0	0.295004
ENSG00000144354	CDCA7	cell division cycle associated 7	-1.4	7.46	-3.4	-0.3	0.0162	0	0.294742
ENSG00000116138	DNAJC16	DnaJ (Hsp40) homolog, subfamily C, member 16	-1.9	7.46	-4.8	-0.4	0.0162	0	0.29448
ENSG00000184445	KNTC1	kinetochore associated 1	-1.7	7.46	-4.8	-0.1	0.0162	0	0.294218
ENSG00000147454	SLC25A37	solute carrier family 25 (mitochondrial iron transporter), member 37	-2.7	7.45	-5.8	-0.6	0.0162	0	0.293957
ENSG00000162949	CAPN13	calpain 13	2.2	7.45	0.5	4.4	0.0162	0	0.293697
ENSG00000091651	ORC6	origin recognition complex, subunit 6	4.7	7.45	1.6	10	0.0162	0	0.293437
ENSG00000173077	2018-12-01	deleted in esophageal cancer 1	-2.3	7.45	-5.8	-0.5	0.0162	0	0.293177
ENSG00000163596	ICA1L	islet cell autoantigen 1,69kDa-like	-1.8	7.44	-6.5	-0.3	0.0163	0	0.294726
ENSG00000102978	POLR2C	polymerase (RNA) II (DNA directed) polypeptide C, 33kDa	2.7	7.44	0.7	6.6	0.0163	0	0.294466
ENSG00000083807	SLC27A5	solute carrier family 27 (fatty acid transporter), member 5	1.8	7.44	0.5	4.3	0.0163	0	0.294206
ENSG00000116288	PARK7	parkinson protein 7	3.4	7.43	0.7	7.2	0.0164	0	0.29575
ENSG00000159352	PSMD4	proteasome (prosome, macropain) 26S subunit, non-ATPase, 4	3.1	7.43	0.8	7.2	0.0164	0	0.295489
ENSG00000167522	ANKRD11	ankyrin repeat domain 11	-2	7.43	-5.4	-0.4	0.0164	0	0.295229
ENSG00000126216	TUBGCP3	tubulin, gamma complex associated protein 3	-1.8	7.43	-5.1	5.5	0.0164	0	0.294969
ENSG00000178927	C17ORF62	chromosome 17 open reading frame 62	2.4	7.43	0.5	5.7	0.0164	0	0.29471
ENSG00000105697	HAMP	hepcidin antimicrobial peptide	1.6	7.43	0.3	4.1	0.0164	0	0.294451
ENSG00000163736	PPBP	pro-platelet basic protein (chemokine (C-X-C motif) ligand 7)	2.6	7.43	0.4	6	0.0164	0	0.294193
ENSG00000158623	COPG2	coatomer protein complex, subunit gamma 2	1.9	7.42	0.4	4.9	0.0164	0	0.293935
ENSG00000198771	RCSD1	RCSD domain containing 1	1.9	7.42	0.4	4.5	0.0164	0	0.293678
ENSG00000167920	TMEM99	transmembrane protein 99	4.6	7.42	1.7	11	0.0164	0	0.293421
ENSG00000267335	CTB-60B18.6	N/A	3.8	7.42	1	8.3	0.0164	0	0.293164
ENSG00000140521	POLG	polymerase (DNA directed), gamma	4	7.41	1.1	9	0.0165	0	0.294694
ENSG00000137713	PPP2R1B	protein phosphatase 2, regulatory subunit A, beta	2.6	7.4	0.4	7.1	0.0165	0	0.294437
ENSG00000173156	RHOD	ras homolog family member D	2.3	7.4	-2	5.9	0.0165	0	0.29418
ENSG00000221819	C16ORF3	chromosome 16 open reading frame 3	2.9	7.39	0.5	6.2	0.0166	0	0.295706
ENSG00000113319	RASGRF2	Ras protein-specific guanine nucleotide-releasing factor 2	2.2	7.39	-1.7	6.2	0.0166	0	0.295448
ENSG00000143702	CEP170	centrosomal protein 170kDa	-1.4	7.39	-3.3	-0.3	0.0166	0	0.295191
ENSG00000095539	SEMA4G	sema domain, immunoglobulin domain (Ig), transmembrane domain (TM) and short cytoplasmic domain, (semaphorin) 4G	-1.4	7.38	-4.6	-0.2	0.0167	0	0.296712
ENSG00000155561	NUP205	nucleoporin 205kDa	-1.6	7.38	-3.5	-0.3	0.0167	0	0.296454
ENSG00000155629	PIK3AP1	phosphoinositide-3-kinase adaptor protein 1	2.3	7.38	0.5	6.2	0.0167	0	0.296197
ENSG00000172239	PAIP1	poly(A) binding protein interacting protein 1	4	7.37	0.8	8.4	0.0167	0	0.29594
ENSG00000171811	TTC40	N/A	3.2	7.36	0.8	7	0.0168	0	0.297455
ENSG00000145861	C1QTNF2	C1q and tumor necrosis factor related protein 2	2.8	7.36	0.5	5.9	0.0168	0	0.297197
ENSG00000004777	ARHGAP33	Rho GTPase activating protein 33	1.5	7.36	0.4	3.5	0.0168	0	0.29694
ENSG00000165699	TSC1	tuberous sclerosis 1	-2.2	7.36	-5.2	-0.4	0.0168	0	0.296684
ENSG00000165478	HEPACAM	hepatic and glial cell adhesion molecule	1.9	7.35	0.4	4.5	0.0168	0	0.296428
ENSG00000153002	CPB1	carboxypeptidase B1 (tissue)	-1.9	7.34	-4.2	-0.4	0.0169	0	0.297935
ENSG00000254667	AP000783.1	N/A	1.7	7.34	0.3	3.7	0.0169	0	0.297679
ENSG00000269343	ZNF587B	zinc finger protein 587B	2.5	7.33	0.7	5.9	0.017	0	0.299182
ENSG00000121766	ZCCHC17	zinc finger, CCHC domain containing 17	3.2	7.32	0.6	7.3	0.017	0	0.298925
ENSG00000154839	SKA1	spindle and kinetochore associated complex subunit 1	-1.5	7.32	-3.8	-0.2	0.017	0	0.298668
ENSG00000135318	NT5E	5'-nucleotidase, ecto (CD73)	-2.1	7.32	-6.5	3.6	0.017	0	0.298412
ENSG00000104081	BMF	Bcl2 modifying factor	-2.8	7.32	-6.5	-0.7	0.017	0	0.298156
ENSG00000177548	RABEP2	rabaptin, RAB GTPase binding effector protein 2	2.1	7.31	0.1	5.5	0.0171	0	0.299653
ENSG00000241945	PWP2	PWP2 periodic tryptophan protein homolog (yeast)	4.2	7.31	1.5	8.6	0.0171	0	0.299396
ENSG00000161509	GRIN2C	glutamate receptor, ionotropic, N-methyl D-aspartate 2C	2.2	7.31	0.3	6.3	0.0171	0	0.29914
ENSG00000092020	PPP2R3C	protein phosphatase 2, regulatory subunit B'', gamma	-1.4	7.31	-3.9	-0.3	0.0171	0	0.298885
ENSG00000130653	PNPLA7	patatin-like phospholipase domain containing 7	-2.1	7.31	-5.1	-0.3	0.0171	0	0.298629
ENSG00000172315	TP53RK	TP53 regulating kinase	4.4	7.31	1.2	10.1	0.0171	0	0.298375
ENSG00000179833	SERTAD2	SERTA domain containing 2	1.8	7.3	0.3	4.2	0.0172	0	0.299864
ENSG00000160410	SHKBP1	SH3KBP1 binding protein 1	1.5	7.3	0.3	3.7	0.0172	0	0.299608
ENSG00000262664	OVCA2	ovarian tumor suppressor candidate 2	2.8	7.3	0.5	6.4	0.0172	0	0.299353
ENSG00000101191	DIDO1	death inducer-obliterator 1	-1.6	7.3	-3.9	-0.2	0.0172	0	0.299099
ENSG00000124875	CXCL6	chemokine (C-X-C motif) ligand 6	2.5	7.29	0.3	7.2	0.0172	0	0.298845
ENSG00000100302	RASD2	RASD family, member 2	2.4	7.29	0.5	5.3	0.0172	0	0.298591
ENSG00000204262	COL5A2	collagen, type V, alpha 2	-1.7	7.29	-4.3	-0.3	0.0172	0	0.298338
ENSG00000164136	IL15	interleukin 15	-2.3	7.28	-5.8	-0.5	0.0173	0	0.299818
ENSG00000244291	C7ORF13	chromosome 7 open reading frame 13	-2.3	7.28	-5.9	-0.4	0.0173	0	0.299564
ENSG00000144668	ITGA9	integrin, alpha 9	-2.4	7.28	-6.3	-0.4	0.0173	0	0.29931
ENSG00000182541	LIMK2	LIM domain kinase 2	2.3	7.28	0.4	5.1	0.0173	0	0.299057
ENSG00000005189	AC004381.6	N/A	-1.5	7.28	-3.3	-0.3	0.0173	0	0.298805
ENSG00000099860	GADD45B	growth arrest and DNA-damage-inducible, beta	2.9	7.28	0.7	6.4	0.0173	0	0.298553
ENSG00000104904	OAZ1	ornithine decarboxylase antizyme 1	-1.5	7.27	-3.4	-0.3	0.0173	0	0.298301
ENSG00000173744	AGFG1	ArfGAP with FG repeats 1	-2.1	7.27	-4.7	-0.4	0.0173	0	0.29805
ENSG00000137845	ADAM10	ADAM metallopeptidase domain 10	-2.3	7.27	-5.5	-0.5	0.0173	0	0.297799
ENSG00000103740	ACSBG1	acyl-CoA synthetase bubblegum family member 1	2.9	7.26	0.6	6.4	0.0174	0	0.299268
ENSG00000198612	COPS8	COP9 signalosome subunit 8	2.4	7.26	-4.2	6.9	0.0174	0	0.299017
ENSG00000006704	GTF2IRD1	GTF2I repeat domain containing 1	-2	7.26	-5.1	-0.3	0.0174	0	0.298766
ENSG00000148843	PDCD11	programmed cell death 11	-1.9	7.26	-4.3	-0.4	0.0174	0	0.298515
ENSG00000105063	PPP6R1	protein phosphatase 6, regulatory subunit 1	1.8	7.25	0.2	5.7	0.0175	0	0.299979
ENSG00000169418	NPR1	natriuretic peptide receptor 1	-1.8	7.25	-4.4	-0.3	0.0175	0	0.299728
ENSG00000125967	NECAB3	N-terminal EF-hand calcium binding protein 3	1.9	7.25	0.3	4.4	0.0175	0	0.299477
ENSG00000269402	AC116407.2	N/A	1.4	7.25	0.4	3.6	0.0175	0	0.299227
ENSG00000017260	ATP2C1	ATPase, Ca++ transporting, type 2C, member 1	-1.5	7.24	-3.6	-0.2	0.0175	0	0.298977
ENSG00000170903	MSANTD4	Myb/SANT-like DNA-binding domain containing 4 with coiled-coils	-1.7	7.23	-3.8	-0.3	0.0176	0	0.300434
ENSG00000145782	ATG12	autophagy related 12	1.8	7.23	0.4	3.7	0.0176	0	0.300183
ENSG00000146083	RNF44	ring finger protein 44	-2.1	7.23	-7	1.3	0.0176	0	0.299933
ENSG00000100243	CYB5R3	cytochrome b5 reductase 3	2.7	7.22	0.7	5.3	0.0176	0	0.299684
ENSG00000147316	MCPH1	microcephalin 1	-1.9	7.22	-5.3	3	0.0176	0	0.299434
ENSG00000100201	DDX17	DEAD (Asp-Glu-Ala-Asp) box helicase 17	2.1	7.22	0.4	4.6	0.0176	0	0.299185
ENSG00000125846	ZNF133	zinc finger protein 133	-1.6	7.22	-3.9	-0.3	0.0176	0	0.298937
ENSG00000106701	FSD1L	fibronectin type III and SPRY domain containing 1-like	-2.3	7.22	-6.3	-0.4	0.0176	0	0.298689
ENSG00000043143	JADE2	jade family PHD finger 2	1.8	7.22	0.4	3.8	0.0176	0	0.298441
ENSG00000178015	GPR150	G protein-coupled receptor 150	4.9	7.22	2.2	11	0.0176	0	0.298194
ENSG00000196878	LAMB3	laminin, beta 3	-1.8	7.21	-6	0.7	0.0177	0	0.29964
ENSG00000132466	ANKRD17	ankyrin repeat domain 17	1.8	7.2	0.4	4	0.0178	0	0.301084
ENSG00000221878	PSG7	pregnancy specific beta-1-glycoprotein 7 (gene/pseudogene)	1.9	7.2	0.4	4.3	0.0178	0	0.300835
ENSG00000177302	TOP3A	topoisomerase (DNA) III alpha	3.3	7.2	0.7	6.7	0.0178	0	0.300586
ENSG00000185630	PBX1	pre-B-cell leukemia homeobox 1	-2.5	7.2	-5.5	-0.5	0.0178	0	0.300338
ENSG00000143774	GUK1	guanylate kinase 1	2.5	7.2	0.5	5.6	0.0178	0	0.300091
ENSG00000126950	TMEM35	transmembrane protein 35	-2.4	7.19	-7	-0.3	0.0178	0	0.299843
ENSG00000168496	FEN1	flap structure-specific endonuclease 1	4.3	7.19	1.8	8.8	0.0178	0	0.299597
ENSG00000127743	IL17B	interleukin 17B	-1.4	7.19	-4.6	-0.1	0.0178	0	0.29935
ENSG00000105369	CD79A	CD79a molecule, immunoglobulin-associated alpha	1.8	7.19	0.3	4.2	0.0178	0	0.299104
ENSG00000141437	SLC25A52	solute carrier family 25, member 52	2.5	7.18	0.4	6.2	0.0179	0	0.300538
ENSG00000214827	MTCP1	mature T-cell proliferation 1	-2	7.18	-4.9	-0.3	0.0179	0	0.300291
ENSG00000103510	KAT8	K(lysine) acetyltransferase 8	2.5	7.18	0.5	5	0.0179	0	0.300045
ENSG00000100652	SLC10A1	solute carrier family 10 (sodium/bile acid cotransporter), member 1	-1.3	7.17	-3	-0.4	0.0179	0	0.299799
ENSG00000223547	ZNF844	zinc finger protein 844	3.1	7.17	0.7	6.9	0.0179	0	0.299554
ENSG00000272325	NUDT3	nudix (nucleoside diphosphate linked moiety X)-type motif 3	3.7	7.17	1.4	8.6	0.0179	0	0.299309
ENSG00000138069	RAB1A	RAB1A, member RAS oncogene family	2	7.16	0.3	5.1	0.018	0	0.300735
ENSG00000080644	CHRNA3	cholinergic receptor, nicotinic, alpha 3 (neuronal)	-1.9	7.16	-5.1	-0.2	0.018	0	0.30049
ENSG00000164818	HEATR2	HEAT repeat containing 2	3.1	7.16	-1.2	7	0.018	0	0.300245
ENSG00000142192	APP	amyloid beta (A4) precursor protein	-1.6	7.16	-4.9	-0.3	0.018	0	0.3
ENSG00000119673	ACOT2	acyl-CoA thioesterase 2	1.9	7.15	0.3	5.7	0.0181	0	0.301421
ENSG00000168779	SHOX2	short stature homeobox 2	-1.8	7.14	-4.2	-0.3	0.0181	0	0.301176
ENSG00000132376	INPP5K	inositol polyphosphate-5-phosphatase K	-1.9	7.14	-4.7	-0.4	0.0181	0	0.300931
ENSG00000040633	PHF23	PHD finger protein 23	1.4	7.14	0.3	3.3	0.0181	0	0.300686
ENSG00000120686	UFM1	ubiquitin-fold modifier 1	-2.1	7.13	-4.9	-0.3	0.0182	0	0.302102
ENSG00000135164	DMTF1	cyclin D binding myb-like transcription factor 1	-1.8	7.13	-5.1	3.3	0.0182	0	0.301857
ENSG00000272987	OR5AL1	olfactory receptor, family 5, subfamily AL, member 1 (gene/pseudogene)	-1.5	7.12	-3.6	-0.3	0.0183	0	0.30327
ENSG00000109576	AADAT	aminoadipate aminotransferase	1.7	7.12	0.2	4	0.0183	0	0.303024
ENSG00000120324	PCDHB10	protocadherin beta 10	2.9	7.12	0.7	7.4	0.0183	0	0.302779
ENSG00000183648	NDUFB1	NADH dehydrogenase (ubiquinone) 1 beta subcomplex, 1, 7kDa	-2.2	7.12	-5.3	-0.3	0.0183	0	0.302534
ENSG00000259332	ST20-MTHFS	ST20-MTHFS readthrough	2.5	7.11	0.8	5.9	0.0184	0	0.303942
ENSG00000148136	OR13C4	olfactory receptor, family 13, subfamily C, member 4	-2	7.11	-4.5	-0.4	0.0184	0	0.303697
ENSG00000162384	C1ORF123	chromosome 1 open reading frame 123	1.8	7.11	0.2	4.4	0.0184	0	0.303452
ENSG00000182759	MAFA	v-maf avian musculoaponeurotic fibrosarcoma oncogene homolog A	4.6	7.11	2.1	10.9	0.0184	0	0.303207
ENSG00000137815	RTF1	Rtf1, Paf1/RNA polymerase II complex component, homolog (S. cerevisiae)	2.8	7.11	0.5	6.4	0.0184	0	0.302963
ENSG00000108443	RPS6KB1	ribosomal protein S6 kinase, 70kDa, polypeptide 1	3.4	7.1	0.8	7.8	0.0184	0	0.302719
ENSG00000221829	FANCG	Fanconi anemia, complementation group G	1.4	7.1	0.3	3.6	0.0184	0	0.302476
ENSG00000132518	GUCY2D	guanylate cyclase 2D, membrane (retina-specific)	-2.5	7.1	-5.7	-0.5	0.0184	0	0.302233
ENSG00000269242	CTD-2192J16.22	N/A	2.1	7.09	0.3	6.3	0.0185	0	0.303632
ENSG00000137841	PLCB2	phospholipase C, beta 2	-1.6	7.09	-4	-0.3	0.0185	0	0.303388
ENSG00000158985	CDC42SE2	CDC42 small effector 2	1.7	7.09	0.2	4.3	0.0185	0	0.303145
ENSG00000130711	PRDM12	PR domain containing 12	-1.9	7.09	-4.6	-0.2	0.0185	0	0.302902
ENSG00000011258	MBTD1	mbt domain containing 1	2	7.09	0.3	5.4	0.0185	0	0.30266
ENSG00000170542	SERPINB9	serpin peptidase inhibitor, clade B (ovalbumin), member 9	-2.1	7.09	-7	1.4	0.0185	0	0.302418
ENSG00000167525	PROCA1	protein interacting with cyclin A1	-2	7.08	-5.8	5	0.0186	0	0.30381
ENSG00000106153	CHCHD2	coiled-coil-helix-coiled-coil-helix domain containing 2	2.4	7.08	0.4	6.9	0.0186	0	0.303567
ENSG00000105278	ZFR2	zinc finger RNA binding protein 2	2.2	7.08	0.1	5.4	0.0186	0	0.303325
ENSG00000105325	FZR1	fizzy/cell division cycle 20 related 1 (Drosophila)	1.6	7.08	0.4	3.6	0.0186	0	0.303084
ENSG00000167414	GNG8	guanine nucleotide binding protein (G protein), gamma 8	1.8	7.07	0.2	4.8	0.0186	0	0.302842
ENSG00000148604	RGR	retinal G protein coupled receptor	-1.5	7.07	-4.4	-0.1	0.0186	0	0.302601
ENSG00000163818	LZTFL1	leucine zipper transcription factor-like 1	-1.4	7.07	-4.4	-0.1	0.0186	0	0.302361
ENSG00000177938	CAPZA3	capping protein (actin filament) muscle Z-line, alpha 3	-2	7.06	-4.7	-0.2	0.0187	0	0.303745
ENSG00000187513	GJA4	gap junction protein, alpha 4, 37kDa	2.7	7.06	0.5	6.7	0.0187	0	0.303504
ENSG00000075218	GTSE1	G-2 and S-phase expressed 1	-2	7.06	-5.1	-0.3	0.0187	0	0.303263
ENSG00000227152	OR2T7	olfactory receptor, family 2, subfamily T, member 7	-1.6	7.05	-3.4	-0.3	0.0188	0	0.304643
ENSG00000255537	AP000708.1	N/A	1.6	7.05	0.3	3.8	0.0188	0	0.304402
ENSG00000115317	HTRA2	HtrA serine peptidase 2	-1.5	7.05	-3.6	-0.2	0.0188	0	0.304161
ENSG00000223638	RFPL4A	ret finger protein-like 4A	3.6	7.05	0.9	7.4	0.0188	0	0.303921
ENSG00000249709	ZNF564	zinc finger protein 564	-2.1	7.04	-5.6	-0.3	0.0188	0	0.303681
ENSG00000108688	CCL7	chemokine (C-C motif) ligand 7	2.2	7.04	0	6	0.0188	0	0.303441
ENSG00000181786	ACTL9	actin-like 9	2.1	7.04	0.4	4.3	0.0188	0	0.303202
ENSG00000128011	LRFN1	leucine rich repeat and fibronectin type III domain containing 1	1.4	7.03	0.3	3.4	0.0189	0	0.304574
ENSG00000132321	IQCA1	IQ motif containing with AAA domain 1	-1.5	7.03	-3.6	-0.2	0.0189	0	0.304335
ENSG00000103066	PLA2G15	phospholipase A2, group XV	-1.2	7.03	-3.8	-0.2	0.0189	0	0.304095
ENSG00000089050	RBBP9	retinoblastoma binding protein 9	-2.3	7.02	-5.7	-0.3	0.019	0	0.305464
ENSG00000155846	PPARGC1B	peroxisome proliferator-activated receptor gamma, coactivator 1 beta	2.3	7.02	0.3	6.7	0.019	0	0.305224
ENSG00000130956	HABP4	hyaluronan binding protein 4	3.1	7.02	0.5	6.7	0.019	0	0.304984
ENSG00000122958	VPS26A	vacuolar protein sorting 26 homolog A (S. pombe)	1.9	7.02	0.4	5.1	0.019	0	0.304745
ENSG00000100124	ANKRD54	ankyrin repeat domain 54	1.4	7.01	0.3	3.4	0.019	0	0.304506
ENSG00000196867	ZFP28	ZFP28 zinc finger protein	2.1	7.01	-1.1	6.3	0.019	0	0.304268
ENSG00000136327	NKX2-8	NK2 homeobox 8	4.4	7.01	1.3	9.2	0.019	0	0.30403
ENSG00000242107	LINC01100	long intergenic non-protein coding RNA 1100	2	7.01	0.3	4.2	0.019	0	0.303792
ENSG00000269693	CTD-2192J16.20	N/A	2.2	7.01	-0.2	5.8	0.019	0	0.303555
ENSG00000083642	PDS5B	PDS5, regulator of cohesion maintenance, homolog B (S. cerevisiae)	-1.5	7.01	-3.7	-0.3	0.019	0	0.303318
ENSG00000181631	P2RY13	purinergic receptor P2Y, G-protein coupled, 13	2.8	7	0.5	6.5	0.0191	0	0.304676
ENSG00000048545	GUCA1A	guanylate cyclase activator 1A (retina)	-1.6	7	-3.8	-0.2	0.0191	0	0.304439
ENSG00000105197	TIMM50	translocase of inner mitochondrial membrane 50 homolog (S. cerevisiae)	3.6	7	0.6	8.6	0.0191	0	0.304202
ENSG00000137221	TJAP1	tight junction associated protein 1 (peripheral)	-1.9	6.98	-4	-0.3	0.0193	0	0.307148
ENSG00000155868	MED7	mediator complex subunit 7	1.8	6.98	0.4	4.3	0.0193	0	0.306909
ENSG00000148634	HERC4	HECT and RLD domain containing E3 ubiquitin protein ligase 4	1.8	6.97	0.3	4.3	0.0194	0	0.30826
ENSG00000180475	OR10Q1	olfactory receptor, family 10, subfamily Q, member 1	-1.6	6.96	-3.8	-0.3	0.0194	0	0.30802
ENSG00000167791	CABP2	calcium binding protein 2	2	6.96	0.3	4.7	0.0194	0	0.307781
ENSG00000259224	SLC35G6	solute carrier family 35, member G6	3.9	6.96	0.8	10	0.0194	0	0.307543
ENSG00000184216	IRAK1	interleukin-1 receptor-associated kinase 1	-1.7	6.96	-4.8	0.1	0.0194	0	0.307304
ENSG00000189001	SBSN	suprabasin	1.7	6.96	0.3	4.5	0.0194	0	0.307067
ENSG00000100380	ST13	suppression of tumorigenicity 13 (colon carcinoma) (Hsp70 interacting protein)	1.9	6.95	0.5	4.7	0.0195	0	0.308411
ENSG00000124449	IRGC	immunity-related GTPase family, cinema	1.8	6.95	0.2	3.9	0.0195	0	0.308172
ENSG00000135222	CSN2	casein beta	2.1	6.94	-2.1	5.5	0.0196	0	0.309514
ENSG00000165997	ARL5B	ADP-ribosylation factor-like 5B	3	6.94	0.7	7.7	0.0196	0	0.309275
ENSG00000139826	ABHD13	abhydrolase domain containing 13	-2.1	6.93	-5.2	-0.3	0.0196	0	0.309036
ENSG00000142230	SAE1	SUMO1 activating enzyme subunit 1	6.1	6.93	2.5	12	0.0196	0	0.308798
ENSG00000105982	RNF32	ring finger protein 32	-1.6	6.92	-4.8	3.7	0.0197	0	0.310135
ENSG00000078142	PIK3C3	phosphatidylinositol 3-kinase, catalytic subunit type 3	-1.7	6.92	-5.6	0.2	0.0197	0	0.309896
ENSG00000081138	CDH7	cadherin 7, type 2	-1.6	6.92	-4.6	-0.3	0.0197	0	0.309658
ENSG00000161243	FBXO27	F-box protein 27	1.7	6.91	0.3	3.6	0.0198	0	0.310991
ENSG00000047056	WDR37	WD repeat domain 37	-1.6	6.91	-4.3	-0.2	0.0198	0	0.310752
ENSG00000179091	CYC1	cytochrome c-1	-1.9	6.91	-5	-0.3	0.0198	0	0.310514
ENSG00000162819	BROX	BRO1 domain and CAAX motif containing	2.1	6.91	0.3	5.4	0.0198	0	0.310276
ENSG00000178297	TMPRSS9	transmembrane protease, serine 9	1.8	6.9	0.3	4.3	0.0198	0	0.310038
ENSG00000211820	TRAV41	T cell receptor alpha variable 41	2.4	6.89	0.4	5.4	0.0199	0	0.311366
ENSG00000019102	VSIG2	V-set and immunoglobulin domain containing 2	2.3	6.89	0.4	6.8	0.0199	0	0.311128
ENSG00000023909	GCLM	glutamate-cysteine ligase, modifier subunit	-1.3	6.88	-4.5	-0.1	0.02	0	0.312452
ENSG00000121058	COIL	coilin	4.5	6.88	1.5	10.8	0.02	0	0.312214
ENSG00000167378	IRGQ	immunity-related GTPase family, Q	2.4	6.88	0.4	5.4	0.02	0	0.311976
ENSG00000182185	RAD51B	RAD51 paralog B	1.5	6.87	0.2	3.7	0.0201	0	0.313296
ENSG00000146276	GABRR1	gamma-aminobutyric acid (GABA) A receptor, rho 1	2.6	6.87	0.6	5.2	0.0201	0	0.313058
ENSG00000160207	HSF2BP	heat shock transcription factor 2 binding protein	-2.2	6.87	-7.3	-0.4	0.0201	0	0.31282
ENSG00000139445	FOXN4	forkhead box N4	-1.6	6.86	-3.9	-0.2	0.0202	0	0.314137
ENSG00000140807	NKD1	naked cuticle homolog 1 (Drosophila)	-2	6.86	-5	-0.3	0.0202	0	0.313898
ENSG00000185482	STAC3	SH3 and cysteine rich domain 3	-1.8	6.86	-5	0	0.0202	0	0.31366
ENSG00000174527	MYO1H	myosin IH	-1.6	6.86	-3.8	-0.2	0.0202	0	0.313422
ENSG00000021300	PLEKHB1	pleckstrin homology domain containing, family B (evectins) member 1	-1.7	6.86	-4.3	-0.2	0.0202	0	0.313184
ENSG00000092140	G2E3	G2/M-phase specific E3 ubiquitin protein ligase	-1.5	6.85	-6	8.4	0.0202	0	0.312947
ENSG00000154479	CCDC173	coiled-coil domain containing 173	2.8	6.85	0.4	7.5	0.0202	0	0.31271
ENSG00000147443	DOK2	docking protein 2, 56kDa	2.9	6.85	0.5	6.6	0.0202	0	0.312474
ENSG00000127080	IPPK	inositol 1,3,4,5,6-pentakisphosphate 2-kinase	3.9	6.84	0.9	8.7	0.0203	0	0.313783
ENSG00000160999	SH2B2	SH2B adaptor protein 2	-1.7	6.83	-4.3	0.9	0.0204	0	0.315091
ENSG00000006837	CDKL3	cyclin-dependent kinase-like 3	-1.6	6.83	-4	-0.2	0.0204	0	0.314853
ENSG00000096080	MRPS18A	mitochondrial ribosomal protein S18A	2	6.81	0.3	6.2	0.0206	0	0.3177
ENSG00000086189	DIMT1	DIM1 dimethyladenosine transferase 1 homolog (S. cerevisiae)	3.6	6.81	0.9	7.8	0.0206	0	0.31746
ENSG00000237330	RNF223	ring finger protein 223	1.7	6.81	0.2	3.8	0.0206	0	0.317221
ENSG00000137942	FNBP1L	formin binding protein 1-like	-2.6	6.81	-6.2	-0.3	0.0206	0	0.316983
ENSG00000137210	TMEM14B	transmembrane protein 14B	2.1	6.8	0.3	5.7	0.0206	0	0.316744
ENSG00000170426	SDR9C7	short chain dehydrogenase/reductase family 9C, member 7	-1.9	6.8	-4.5	-0.3	0.0206	0	0.316506
ENSG00000138663	COPS4	COP9 signalosome subunit 4	-1.6	6.79	-4.7	-0.1	0.0207	0	0.317804
ENSG00000153975	ZUFSP	zinc finger with UFM1-specific peptidase domain	3.9	6.79	0.8	8.2	0.0207	0	0.317566
ENSG00000108797	CNTNAP1	contactin associated protein 1	2.4	6.79	0.4	5.2	0.0207	0	0.317328
ENSG00000134709	HOOK1	hook microtubule-tethering protein 1	-1.9	6.78	-6.3	-0.3	0.0208	0	0.318622
ENSG00000174788	PCP2	Purkinje cell protein 2	1.9	6.77	0.3	4	0.0209	0	0.319914
ENSG00000124467	PSG8	pregnancy specific beta-1-glycoprotein 8	2	6.77	0.2	4.5	0.0209	0	0.319675
ENSG00000183281	PLGLB1	plasminogen-like B1	-2.2	6.77	-5.9	-1.1	0.0209	0	0.319436
ENSG00000130829	DUSP9	dual specificity phosphatase 9	2.4	6.76	0.3	7.3	0.0209	0	0.319197
ENSG00000080200	CRYBG3	beta-gamma crystallin domain containing 3	2.4	6.76	0.3	5.6	0.0209	0	0.318959
ENSG00000188771	PLET1	placenta expressed transcript 1	1.6	6.76	0.2	3.7	0.0209	0	0.318721
ENSG00000169208	OR10G3	olfactory receptor, family 10, subfamily G, member 3	-2	6.75	-5.4	-0.3	0.021	0	0.320007
ENSG00000140406	MESDC1	mesoderm development candidate 1	2.3	6.75	0.3	4.6	0.021	0	0.319769
ENSG00000184708	EIF4ENIF1	eukaryotic translation initiation factor 4E nuclear import factor 1	-1.8	6.75	-5.4	0.2	0.021	0	0.319531
ENSG00000204960	BLACE	B-cell acute lymphoblastic leukemia expressed	-3.3	6.75	-7.3	-0.8	0.021	0	0.319294
ENSG00000115112	TFCP2L1	transcription factor CP2-like 1	2	6.75	0.3	4.4	0.021	0	0.319056
ENSG00000047648	ARHGAP6	Rho GTPase activating protein 6	2.5	6.75	0.3	7.8	0.021	0	0.31882
ENSG00000196834	POTEI	POTE ankyrin domain family, member I	-1.7	6.74	-6.3	0	0.0211	0	0.3201
ENSG00000166856	GPR182	G protein-coupled receptor 182	1.7	6.74	0.2	3.7	0.0211	0	0.319863
ENSG00000153563	CD8A	CD8a molecule	2	6.74	0.3	4.6	0.0211	0	0.319626
ENSG00000136758	YME1L1	YME1-like 1 ATPase	-1.5	6.74	-4.5	0	0.0211	0	0.319389
ENSG00000261832	CLN3	ceroid-lipofuscinosis, neuronal 3	1.5	6.73	0.3	3.8	0.0212	0	0.320666
ENSG00000271698	GS1-393G12.13	N/A	1.9	6.73	0.3	5.1	0.0212	0	0.320429
ENSG00000163904	SENP2	SUMO1/sentrin/SMT3 specific peptidase 2	2.3	6.73	0.4	4.9	0.0212	0	0.320192
ENSG00000187210	GCNT1	glucosaminyl (N-acetyl) transferase 1, core 2	4.7	6.72	1.3	10.3	0.0213	0	0.321465
ENSG00000185825	BCAP31	B-cell receptor-associated protein 31	2.1	6.72	0.4	4.5	0.0213	0	0.321228
ENSG00000167674	HDGFRP2	hepatoma-derived growth factor-related protein 2	-1.7	6.72	-4.1	-0.1	0.0213	0	0.320991
ENSG00000100225	FBXO7	F-box protein 7	2.2	6.71	0.3	5	0.0213	0	0.320755
ENSG00000143256	PFDN2	prefoldin subunit 2	4.7	6.71	-2.3	10	0.0213	0	0.320519
ENSG00000170734	POLH	polymerase (DNA directed), eta	2.7	6.71	-3.6	7.5	0.0213	0	0.320283
ENSG00000175073	VCPIP1	valosin containing protein (p97)/p47 complex interacting protein 1	2	6.71	0.3	5.6	0.0213	0	0.320048
ENSG00000158125	XDH	xanthine dehydrogenase	4.1	6.71	0.9	9.8	0.0213	0	0.319813
ENSG00000136944	LMX1B	LIM homeobox transcription factor 1, beta	-1.6	6.71	-4	-0.2	0.0213	0	0.319578
ENSG00000172893	DHCR7	7-dehydrocholesterol reductase	2.1	6.7	0.2	4.8	0.0214	0	0.320843
ENSG00000206069	TMEM211	transmembrane protein 211	2.5	6.7	0.4	5.8	0.0214	0	0.320608
ENSG00000101746	NOL4	nucleolar protein 4	-1.3	6.7	-3.9	-0.2	0.0214	0	0.320373
ENSG00000119421	NDUFA8	NADH dehydrogenase (ubiquinone) 1 alpha subcomplex, 8, 19kDa	5.1	6.69	2.4	11	0.0215	0	0.321635
ENSG00000173327	MAP3K11	mitogen-activated protein kinase kinase kinase 11	2.1	6.69	0.2	4.7	0.0215	0	0.3214
ENSG00000158560	DYNC1I1	dynein, cytoplasmic 1, intermediate chain 1	-1.7	6.69	-4.3	-0.2	0.0215	0	0.321165
ENSG00000117707	PROX1	prospero homeobox 1	1.6	6.69	0.2	4.5	0.0215	0	0.320931
ENSG00000165943	MOAP1	modulator of apoptosis 1	-1.7	6.68	-5.1	-0.3	0.0216	0	0.322188
ENSG00000070785	EIF2B3	eukaryotic translation initiation factor 2B, subunit 3 gamma, 58kDa	5.6	6.68	-0.1	12	0.0216	0	0.321953
ENSG00000136709	WDR33	WD repeat domain 33	-1.7	6.67	-5.3	-0.3	0.0217	0	0.323208
ENSG00000124575	HIST1H1D	histone cluster 1, H1d	1.6	6.67	0.3	3.3	0.0217	0	0.322973
ENSG00000213780	GTF2H4	general transcription factor IIH, polypeptide 4, 52kDa	-2.3	6.67	-6	8	0.0217	0	0.322738
ENSG00000254004	ZNF260	zinc finger protein 260	2.3	6.67	0.3	5.1	0.0217	0	0.322504
ENSG00000101474	APMAP	adipocyte plasma membrane associated protein	-1.6	6.67	-4.2	-0.1	0.0217	0	0.322269
ENSG00000167333	TRIM68	tripartite motif containing 68	-1.7	6.66	-4.4	-0.1	0.0218	0	0.32352
ENSG00000173597	SULT1B1	sulfotransferase family, cytosolic, 1B, member 1	-1.5	6.66	-4.3	-0.1	0.0218	0	0.323285
ENSG00000111962	UST	uronyl-2-sulfotransferase	3	6.66	0.6	6	0.0218	0	0.323051
ENSG00000137814	HAUS2	HAUS augmin-like complex, subunit 2	3.4	6.66	-1.6	9	0.0218	0	0.322817
ENSG00000189403	HMGB1	high mobility group box 1	1.6	6.66	0.3	4	0.0218	0	0.322583
ENSG00000030110	BAK1	BCL2-antagonist/killer 1	1.5	6.65	-0.3	4.4	0.0218	0	0.32235
ENSG00000183470	AC009365.3	N/A	3	6.65	0.7	7	0.0218	0	0.322117
ENSG00000168528	SERINC2	serine incorporator 2	-1.8	6.65	-6.3	-0.2	0.0218	0	0.321884
ENSG00000204709	C6ORF100	chromosome 6 open reading frame 100	1.9	6.65	0.2	4.4	0.0218	0	0.321652
ENSG00000151881	C5ORF28	chromosome 5 open reading frame 28	4.2	6.65	0.9	9.6	0.0218	0	0.32142
ENSG00000097033	SH3GLB1	SH3-domain GRB2-like endophilin B1	-2.7	6.65	-7	2.8	0.0218	0	0.321189
ENSG00000105261	OVOL3	ovo-like zinc finger 3	1.6	6.65	0.2	3.9	0.0218	0	0.320958
ENSG00000171116	HSFX1	heat shock transcription factor family, X linked 1	-1.9	6.64	-4.4	-0.3	0.022	0	0.323669
ENSG00000143552	NUP210L	nucleoporin 210kDa-like	-1.8	6.64	-4.6	-0.2	0.022	0	0.323436
ENSG00000256349	CTD-3074O7.11	N/A	4.4	6.64	-1.1	11	0.022	0	0.323204
ENSG00000184640	2018-09-09	septin 9	1.8	6.64	0.2	4.3	0.022	0	0.322972
ENSG00000184863	RBM33	RNA binding motif protein 33	-2.2	6.64	-5.9	-0.3	0.022	0	0.32274
ENSG00000185176	AQP12B	aquaporin 12B	-2.1	6.64	-5	-0.2	0.022	0	0.322509
ENSG00000119715	ESRRB	estrogen-related receptor beta	3.7	6.63	0.5	8.2	0.022	0	0.322278
ENSG00000075884	ARHGAP15	Rho GTPase activating protein 15	3	6.63	0.6	6.3	0.022	0	0.322047
ENSG00000102886	GDPD3	glycerophosphodiester phosphodiesterase domain containing 3	3.9	6.62	0.8	8.6	0.0221	0	0.32328
ENSG00000254772	EEF1G	eukaryotic translation elongation factor 1 gamma	4.2	6.61	1	8.3	0.0222	0	0.32451
ENSG00000162761	LMX1A	LIM homeobox transcription factor 1, alpha	3.2	6.6	0.9	9.7	0.0223	0	0.325739
ENSG00000196099	OR6M1	olfactory receptor, family 6, subfamily M, member 1	2.6	6.6	0.5	6	0.0223	0	0.325507
ENSG00000186318	BACE1	beta-site APP-cleaving enzyme 1	1.8	6.6	0.2	4.1	0.0223	0	0.325275
ENSG00000165698	C9ORF9	chromosome 9 open reading frame 9	-1.6	6.59	-5	0.1	0.0224	0	0.3265
ENSG00000222046	DCDC2B	doublecortin domain containing 2B	2.9	6.59	0.5	7.3	0.0224	0	0.326268
ENSG00000090924	PLEKHG2	pleckstrin homology domain containing, family G (with RhoGef domain) member 2	1.6	6.59	0.2	3.9	0.0224	0	0.326036
ENSG00000131480	AOC2	amine oxidase, copper containing 2 (retina-specific)	-2	6.59	-4.6	-0.2	0.0224	0	0.325804
ENSG00000175604	RP11-276H1.3	N/A	2.1	6.59	0.4	5.1	0.0224	0	0.325572
ENSG00000090989	EXOC1	exocyst complex component 1	-1.4	6.58	-4.4	-0.1	0.0224	0	0.325341
ENSG00000211857	TRAJ32	T cell receptor alpha joining 32	4.2	6.58	1.8	8	0.0224	0	0.32511
ENSG00000184205	TSPYL2	TSPY-like 2	1.7	6.58	0.3	5.7	0.0224	0	0.324879
ENSG00000166589	CDH16	cadherin 16, KSP-cadherin	-2	6.58	-4.6	-0.2	0.0224	0	0.324649
ENSG00000172531	PPP1CA	protein phosphatase 1, catalytic subunit, alpha isozyme	-1.7	6.58	-4.7	-0.1	0.0224	0	0.324419
ENSG00000140365	COMMD4	COMM domain containing 4	1.7	6.58	0.3	4.5	0.0224	0	0.32419
ENSG00000114544	SLC41A3	solute carrier family 41, member 3	1.8	6.57	0.2	6	0.0225	0	0.325407
ENSG00000120992	LYPLA1	lysophospholipase I	3.7	6.57	0.7	9.5	0.0225	0	0.325177
ENSG00000008952	SEC62	SEC62 homolog (S. cerevisiae)	3.4	6.57	0.5	8.4	0.0225	0	0.324947
ENSG00000101470	TNNC2	troponin C type 2 (fast)	-1.5	6.57	-3.5	-0.2	0.0225	0	0.324718
ENSG00000104723	TUSC3	tumor suppressor candidate 3	2	6.56	0.1	5.5	0.0226	0	0.325931
ENSG00000166341	DCHS1	dachsous cadherin-related 1	4.4	6.56	1.9	10.8	0.0226	0	0.325701
ENSG00000198838	RYR3	ryanodine receptor 3	-1.7	6.56	-4.5	-0.1	0.0226	0	0.325472
ENSG00000180264	GPR144	G protein-coupled receptor 144	2.1	6.56	0.2	5	0.0226	0	0.325243
ENSG00000068650	ATP11A	ATPase, class VI, type 11A	-2.3	6.56	-5.8	-0.3	0.0226	0	0.325014
ENSG00000136720	HS6ST1	heparan sulfate 6-O-sulfotransferase 1	3.4	6.55	-0.9	9	0.0227	0	0.326223
ENSG00000188322	SBK1	SH3 domain binding kinase 1	-2.7	6.55	-7.8	-0.3	0.0227	0	0.325994
ENSG00000179755	CTD-2144E22.5	N/A	2.1	6.55	0.4	5	0.0227	0	0.325765
ENSG00000143816	WNT9A	wingless-type MMTV integration site family, member 9A	2.2	6.55	0.2	5.9	0.0227	0	0.325536
ENSG00000133742	CA1	carbonic anhydrase I	2.3	6.55	0.3	5.8	0.0227	0	0.325308
ENSG00000130717	UCK1	uridine-cytidine kinase 1	-1.5	6.55	-4.4	0.7	0.0227	0	0.325081
ENSG00000159267	HLCS	holocarboxylase synthetase (biotin-(proprionyl-CoA-carboxylase (ATP-hydrolysing)) ligase)	1.9	6.55	0.2	5.4	0.0227	0	0.324853
ENSG00000126246	IGFLR1	IGF-like family receptor 1	2.2	6.52	0.3	6.5	0.0229	0	0.327486
ENSG00000147592	LACTB2	lactamase, beta 2	1.6	6.52	0.2	4.5	0.0229	0	0.327257
ENSG00000138400	MDH1B	malate dehydrogenase 1B, NAD (soluble)	3.3	6.52	0.5	7.2	0.0229	0	0.327029
ENSG00000130202	PVRL2	poliovirus receptor-related 2 (herpesvirus entry mediator B)	1.5	6.51	0.3	2.9	0.023	0	0.328227
ENSG00000121406	ZNF549	zinc finger protein 549	1.9	6.51	0.3	3.7	0.023	0	0.327999
ENSG00000040199	PHLPP2	PH domain and leucine rich repeat protein phosphatase 2	1.6	6.51	0.3	3.8	0.023	0	0.32777
ENSG00000155918	RAET1L	retinoic acid early transcript 1L	1.8	6.5	-0.6	5.5	0.0231	0	0.328966
ENSG00000233436	BTBD18	BTB (POZ) domain containing 18	2.4	6.5	0.1	6.4	0.0231	0	0.328737
ENSG00000256591	RP11-286N22.8	N/A	4	6.49	1.7	8	0.0232	0	0.32993
ENSG00000176134	AL445665.1	N/A	2.3	6.49	0.3	6.1	0.0232	0	0.329701
ENSG00000182324	KCNJ14	potassium inwardly-rectifying channel, subfamily J, member 14	1.8	6.49	0.2	4.8	0.0232	0	0.329472
ENSG00000092531	SNAP23	synaptosomal-associated protein, 23kDa	2.7	6.49	0.5	6.4	0.0232	0	0.329244
ENSG00000265118	CTD-2370N5.3	N/A	-2.1	6.49	-5.2	-0.5	0.0232	0	0.329015
ENSG00000178171	AMER3	APC membrane recruitment protein 3	-1.7	6.48	-4.4	2.5	0.0233	0	0.330204
ENSG00000053900	ANAPC4	anaphase promoting complex subunit 4	-2.7	6.48	-7.4	-0.8	0.0233	0	0.329976
ENSG00000132718	SYT11	synaptotagmin XI	-1.6	6.47	-4.3	-0.1	0.0234	0	0.331163
ENSG00000138778	CENPE	centromere protein E, 312kDa	-1.7	6.47	-4.1	-0.3	0.0234	0	0.330934
ENSG00000134516	DOCK2	dedicator of cytokinesis 2	1.8	6.47	0.2	4	0.0234	0	0.330705
ENSG00000205609	EIF3CL	eukaryotic translation initiation factor 3, subunit C-like	4.2	6.47	1.3	9	0.0234	0	0.330477
ENSG00000140015	KCNH5	potassium voltage-gated channel, subfamily H (eag-related), member 5	-1.9	6.47	-5.2	-0.2	0.0234	0	0.330248
ENSG00000185627	PSMD13	proteasome (prosome, macropain) 26S subunit, non-ATPase, 13	-1.7	6.46	-4.8	-0.2	0.0235	0	0.331431
ENSG00000205339	IPO7	importin 7	2.1	6.46	0.3	4.8	0.0235	0	0.331203
ENSG00000172007	RAB33B	RAB33B, member RAS oncogene family	2.7	6.46	0.4	6.2	0.0235	0	0.330975
ENSG00000120733	KDM3B	lysine (K)-specific demethylase 3B	-1.5	6.46	-4.1	0	0.0235	0	0.330747
ENSG00000146576	C7ORF26	chromosome 7 open reading frame 26	-1.5	6.46	-4.5	-0.1	0.0235	0	0.330519
ENSG00000184154	LRTOMT	leucine rich transmembrane and O-methyltransferase domain containing	2.7	6.46	0.4	8.1	0.0235	0	0.330292
ENSG00000174640	SLCO2A1	solute carrier organic anion transporter family, member 2A1	2.8	6.45	0.5	5.8	0.0236	0	0.33147
ENSG00000108813	DLX4	distal-less homeobox 4	1.9	6.44	0.2	4.8	0.0236	0	0.331242
ENSG00000135632	SMYD5	SMYD family member 5	3.8	6.44	0.6	8.6	0.0236	0	0.331015
ENSG00000171217	CLDN20	claudin 20	-1.4	6.44	-3.9	-0.1	0.0236	0	0.330788
ENSG00000163141	BNIPL	BCL2/adenovirus E1B 19kD interacting protein like	-1.4	6.44	-4.6	-0.2	0.0236	0	0.330562
ENSG00000214216	IQCJ	IQ motif containing J	-1.8	6.44	-4.5	-0.2	0.0236	0	0.330335
ENSG00000141750	STAC2	SH3 and cysteine rich domain 2	3.3	6.43	0.6	7.8	0.0237	0	0.331508
ENSG00000099783	HNRNPM	heterogeneous nuclear ribonucleoprotein M	2	6.43	0.3	5.1	0.0237	0	0.331282
ENSG00000066923	STAG3	stromal antigen 3	2.5	6.43	-0.5	7.3	0.0237	0	0.331055
ENSG00000138587	MNS1	meiosis-specific nuclear structural 1	2.7	6.43	0.4	7.3	0.0237	0	0.330829
ENSG00000177479	ARIH2	ariadne RBR E3 ubiquitin protein ligase 2	-1.5	6.43	-4	-0.1	0.0237	0	0.330604
ENSG00000131323	TRAF3	TNF receptor-associated factor 3	1.9	6.43	0.2	4.7	0.0237	0	0.330378
ENSG00000185019	UBOX5	U-box domain containing 5	-1.9	6.43	-5.3	0	0.0237	0	0.330153
ENSG00000125571	IL37	interleukin 37	-1.7	6.43	-4.7	-0.2	0.0237	0	0.329929
ENSG00000160392	C19ORF47	chromosome 19 open reading frame 47	1.6	6.43	0.2	3.4	0.0237	0	0.329704
ENSG00000139726	DENR	density-regulated protein	-1.6	6.43	-3.7	-0.2	0.0237	0	0.32948
ENSG00000143867	OSR1	odd-skipped related transciption factor 1	-2.5	6.42	-6.4	-0.3	0.0238	0	0.330645
ENSG00000205683	DPF3	D4, zinc and double PHD fingers, family 3	-1.6	6.42	-3.9	-0.2	0.0238	0	0.330421
ENSG00000161270	NPHS1	nephrosis 1, congenital, Finnish type (nephrin)	2	6.42	0.2	6.3	0.0238	0	0.330197
ENSG00000133226	SRRM1	serine/arginine repetitive matrix 1	2.1	6.41	0.4	5.8	0.0239	0	0.331359
ENSG00000156136	DCK	deoxycytidine kinase	-1.8	6.41	-4.3	-0.2	0.0239	0	0.331135
ENSG00000079974	RABL2B	RAB, member of RAS oncogene family-like 2B	-1.5	6.41	-4.1	-0.1	0.0239	0	0.330911
ENSG00000092098	RNF31	ring finger protein 31	3	6.4	0.5	6.6	0.024	0	0.33207
ENSG00000211651	IGLV1-44	immunoglobulin lambda variable 1-44	3.3	6.4	0.7	7.3	0.024	0	0.331846
ENSG00000168661	ZNF30	zinc finger protein 30	2	6.4	0.2	4.4	0.024	0	0.331622
ENSG00000205791	LOH12CR2	loss of heterozygosity, 12, chromosomal region 2 (non-protein coding)	-2.3	6.4	-5.8	-0.4	0.024	0	0.331398
ENSG00000149634	SPATA25	spermatogenesis associated 25	1.7	6.4	0.1	4.6	0.024	0	0.331174
ENSG00000129295	LRRC6	leucine rich repeat containing 6	1.7	6.39	-0.1	5	0.0241	0	0.33233
ENSG00000117472	TSPAN1	tetraspanin 1	3.2	6.39	0.6	7.2	0.0241	0	0.332106
ENSG00000197734	C14ORF178	chromosome 14 open reading frame 178	1.7	6.38	-0.2	4.8	0.0242	0	0.333259
ENSG00000169083	AR	androgen receptor	-1.9	6.38	-4.6	-0.2	0.0242	0	0.333035
ENSG00000101346	POFUT1	protein O-fucosyltransferase 1	-2.1	6.38	-5.7	1.9	0.0242	0	0.332811
ENSG00000225556	C2CD4D	C2 calcium-dependent domain containing 4D	-2.1	6.38	-5.7	-0.3	0.0242	0	0.332587
ENSG00000269430	LRRC3DN	LRRC3 downstream neighbor (non-protein coding)	-1.8	6.37	-4.5	-0.2	0.0243	0	0.333737
ENSG00000068137	PLEKHH3	pleckstrin homology domain containing, family H (with MyTH4 domain) member 3	1.6	6.37	0.2	4.9	0.0243	0	0.333513
ENSG00000095627	TDRD1	tudor domain containing 1	3.8	6.37	0.6	8.4	0.0243	0	0.33329
ENSG00000187288	CIDEC	cell death-inducing DFFA-like effector c	-1.7	6.36	-4.6	-0.1	0.0244	0	0.334437
ENSG00000132535	DLG4	discs, large homolog 4 (Drosophila)	-1.6	6.36	-4.3	-0.1	0.0244	0	0.334213
ENSG00000076685	NT5C2	5'-nucleotidase, cytosolic II	-1.6	6.36	-4.4	-0.2	0.0244	0	0.333989
ENSG00000198734	F5	coagulation factor V (proaccelerin, labile factor)	-1.9	6.35	-4.6	-0.2	0.0245	0	0.335134
ENSG00000176547	OR4C3	olfactory receptor, family 4, subfamily C, member 3	-1.6	6.35	-3.8	-0.2	0.0245	0	0.33491
ENSG00000071994	PDCD2	programmed cell death 2	2.4	6.34	0.3	6	0.0246	0	0.336052
ENSG00000184990	SIVA1	SIVA1, apoptosis-inducing factor	-1.8	6.34	-5.9	-0.2	0.0246	0	0.335828
ENSG00000132334	PTPRE	protein tyrosine phosphatase, receptor type, E	-1.4	6.34	-5.4	-0.1	0.0246	0	0.335604
ENSG00000115325	DOK1	docking protein 1, 62kDa (downstream of tyrosine kinase 1)	-1.5	6.34	-3.6	-0.2	0.0246	0	0.33538
ENSG00000174437	ATP2A2	ATPase, Ca++ transporting, cardiac muscle, slow twitch 2	3.8	6.34	1.1	8	0.0246	0	0.335157
ENSG00000120833	SOCS2	suppressor of cytokine signaling 2	-1.4	6.34	-4.7	-0.1	0.0246	0	0.334933
ENSG00000181027	FKRP	fukutin related protein	1.7	6.34	0.2	4.2	0.0246	0	0.334711
ENSG00000054267	ARID4B	AT rich interactive domain 4B (RBP1-like)	-1.9	6.34	-4.1	-0.2	0.0246	0	0.334488
ENSG00000149972	CNTN5	contactin 5	2.4	6.33	-1.2	6.3	0.0247	0	0.335625
ENSG00000086289	EPDR1	ependymin related 1	-1.9	6.33	-5.3	-0.3	0.0247	0	0.335402
ENSG00000256188	TAS2R30	taste receptor, type 2, member 30	3.3	6.33	0.5	7.7	0.0247	0	0.335179
ENSG00000169469	SPRR1B	small proline-rich protein 1B	-1.6	6.32	-3.9	-0.2	0.0248	0	0.336313
ENSG00000185340	GAS2L1	growth arrest-specific 2 like 1	1.7	6.32	0.2	3.8	0.0248	0	0.33609
ENSG00000111275	ALDH2	aldehyde dehydrogenase 2 family (mitochondrial)	-2.4	6.31	-6	-0.6	0.0249	0	0.337222
ENSG00000203857	HSD3B1	hydroxy-delta-5-steroid dehydrogenase, 3 beta- and steroid delta-isomerase 1	-1.7	6.31	-6	-0.1	0.0249	0	0.336999
ENSG00000135540	NHSL1	NHS-like 1	-1.5	6.31	-5.8	-0.1	0.0249	0	0.336776
ENSG00000105227	PRX	periaxin	1.3	6.31	0.2	3.6	0.0249	0	0.336553
ENSG00000064225	ST3GAL6	ST3 beta-galactoside alpha-2,3-sialyltransferase 6	1.7	6.31	0	6	0.0249	0	0.336331
ENSG00000186871	ERCC6L	excision repair cross-complementation group 6-like	2.3	6.3	0.3	5	0.025	0	0.337459
ENSG00000175203	DCTN2	dynactin 2 (p50)	-1.3	6.3	-3.4	-0.1	0.025	0	0.337236
ENSG00000197360	ZNF98	zinc finger protein 98	4.7	6.3	1.9	10	0.025	0	0.337014
ENSG00000158773	USF1	upstream transcription factor 1	2.6	6.3	0.5	5.8	0.025	0	0.336792
ENSG00000135736	CCDC102A	coiled-coil domain containing 102A	-1.9	6.3	-5.2	-0.3	0.025	0	0.33657
ENSG00000126016	AMOT	angiomotin	-1.5	6.29	-3.7	-0.1	0.0251	0	0.337694
ENSG00000112164	GLP1R	glucagon-like peptide 1 receptor	2.1	6.29	0.2	5.5	0.0251	0	0.337472
ENSG00000162613	FUBP1	far upstream element (FUSE) binding protein 1	-1.8	6.29	-4.8	-0.3	0.0251	0	0.33725
ENSG00000185448	FAM47A	family with sequence similarity 47, member A	3.1	6.29	0.5	6.7	0.0251	0	0.337029
ENSG00000181827	RFX7	regulatory factor X, 7	-1.5	6.28	-3.9	-0.1	0.0252	0	0.33815
ENSG00000185101	ANO9	anoctamin 9	2	6.28	0.2	4.6	0.0252	0	0.337928
ENSG00000181092	ADIPOQ	adiponectin, C1Q and collagen domain containing	2.1	6.28	0.2	5.2	0.0252	0	0.337706
ENSG00000080031	PTPRH	protein tyrosine phosphatase, receptor type, H	1.5	6.28	0.3	3.9	0.0252	0	0.337485
ENSG00000173011	TADA2B	transcriptional adaptor 2B	3.1	6.27	0.5	7.4	0.0253	0	0.338603
ENSG00000251039	IGKV2D-40	immunoglobulin kappa variable 2D-40	-1.6	6.26	-4.5	0.1	0.0254	0	0.339719
ENSG00000066777	ARFGEF1	ADP-ribosylation factor guanine nucleotide-exchange factor 1 (brefeldin A-inhibited)	3.1	6.26	0.3	6.7	0.0254	0	0.339497
ENSG00000204231	RXRB	retinoid X receptor, beta	-2	6.26	-5.2	-0.3	0.0254	0	0.339275
ENSG00000165819	METTL3	methyltransferase like 3	-1.5	6.25	-4	-0.1	0.0255	0	0.340388
ENSG00000137265	IRF4	interferon regulatory factor 4	-1.5	6.25	-4	-0.2	0.0255	0	0.340166
ENSG00000203989	RHOXF2B	Rhox homeobox family, member 2B	-1.6	6.25	-4.4	0.7	0.0255	0	0.339945
ENSG00000082556	OPRK1	opioid receptor, kappa 1	2.5	6.25	0.3	5.9	0.0255	0	0.339723
ENSG00000169245	CXCL10	chemokine (C-X-C motif) ligand 10	-1.9	6.24	-6	2	0.0256	0	0.340833
ENSG00000113368	LMNB1	lamin B1	-1.1	6.24	-2.8	-0.1	0.0256	0	0.340612
ENSG00000264324	RP11-287D1.3	N/A	-1.5	6.24	-3.6	-0.2	0.0256	0	0.34039
ENSG00000151702	FLI1	Fli-1 proto-oncogene, ETS transcription factor	1.6	6.23	0.3	3.3	0.0257	0	0.341498
ENSG00000108384	RAD51C	RAD51 paralog C	3.5	6.23	0.8	9	0.0257	0	0.341276
ENSG00000129566	TEP1	telomerase-associated protein 1	1.9	6.23	0.2	4.7	0.0257	0	0.341055
ENSG00000089351	GRAMD1A	GRAM domain containing 1A	1.6	6.23	0.2	3.6	0.0257	0	0.340833
ENSG00000151704	KCNJ1	potassium inwardly-rectifying channel, subfamily J, member 1	2.1	6.23	0.2	5.4	0.0257	0	0.340612
ENSG00000030582	GRN	granulin	2.3	6.22	0.2	5.3	0.0258	0	0.341716
ENSG00000109016	DHRS7B	dehydrogenase/reductase (SDR family) member 7B	1.8	6.22	0.2	4.4	0.0258	0	0.341495
ENSG00000166478	ZNF143	zinc finger protein 143	2.5	6.22	0.3	5.5	0.0258	0	0.341274
ENSG00000177951	BET1L	Bet1 golgi vesicular membrane trafficking protein-like	3.3	6.22	0.4	7.5	0.0258	0	0.341054
ENSG00000136449	MYCBPAP	MYCBP associated protein	-1.5	6.22	-5.4	-0.2	0.0258	0	0.340833
ENSG00000115738	ID2	inhibitor of DNA binding 2, dominant negative helix-loop-helix protein	1.5	6.22	0.1	4	0.0258	0	0.340613
ENSG00000165349	SLC7A3	solute carrier family 7 (cationic amino acid transporter, y+ system), member 3	-1.8	6.22	-4.7	-0.2	0.0258	0	0.340394
ENSG00000167619	TMEM145	transmembrane protein 145	1.6	6.21	0.2	5	0.0259	0	0.341493
ENSG00000198062	POTEH	POTE ankyrin domain family, member H	-1.6	6.21	-4.5	-0.2	0.0259	0	0.341273
ENSG00000140691	ARMC5	armadillo repeat containing 5	-1.8	6.21	-5.6	2.1	0.0259	0	0.341053
ENSG00000183309	ZNF623	zinc finger protein 623	3.4	6.21	0.3	8.3	0.0259	0	0.340833
ENSG00000094880	CDC23	cell division cycle 23	-1.8	6.21	-4.4	-0.4	0.0259	0	0.340614
ENSG00000164051	CCDC51	coiled-coil domain containing 51	-1.9	6.21	-4.7	-0.3	0.0259	0	0.340395
ENSG00000088035	ALG6	ALG6, alpha-1,3-glucosyltransferase	3.6	6.2	0.6	8.6	0.026	0	0.34149
ENSG00000218823	PAPOLB	poly(A) polymerase beta (testis specific)	4.2	6.19	0.4	9.9	0.0261	0	0.342583
ENSG00000129226	CD68	CD68 molecule	-1.5	6.19	-4.5	-0.1	0.0261	0	0.342364
ENSG00000186973	FAM183A	family with sequence similarity 183, member A	-1.8	6.19	-5	3	0.0261	0	0.342144
ENSG00000111775	COX6A1	cytochrome c oxidase subunit VIa polypeptide 1	2.2	6.19	0.2	5.9	0.0261	0	0.341925
ENSG00000174306	ZHX3	zinc fingers and homeoboxes 3	-1.3	6.18	-3.7	-0.1	0.0262	0	0.343015
ENSG00000204978	C19ORF69	N/A	1.8	6.18	0.2	3.9	0.0262	0	0.342796
ENSG00000087303	NID2	nidogen 2 (osteonidogen)	-1.7	6.18	-4.9	-0.2	0.0262	0	0.342577
ENSG00000172243	CLEC7A	C-type lectin domain family 7, member A	2.8	6.18	0.2	7.1	0.0262	0	0.342358
ENSG00000111615	KRR1	KRR1, small subunit (SSU) processome component, homolog (yeast)	2	6.17	0.1	5.7	0.0264	0	0.344751
ENSG00000175938	ORAI3	ORAI calcium release-activated calcium modulator 3	2.9	6.17	0.3	7.7	0.0264	0	0.344531
ENSG00000125450	NUP85	nucleoporin 85kDa	-1.9	6.17	-4.8	-0.1	0.0264	0	0.344311
ENSG00000164162	ANAPC10	anaphase promoting complex subunit 10	-1.3	6.17	-3.8	0.1	0.0264	0	0.344092
ENSG00000008853	RHOBTB2	Rho-related BTB domain containing 2	-2	6.16	-4.9	-0.2	0.0265	0	0.345175
ENSG00000136169	SETDB2	SET domain, bifurcated 2	1.6	6.16	0.1	4.6	0.0265	0	0.344955
ENSG00000172270	BSG	basigin (Ok blood group)	-1.3	6.16	-3.5	0	0.0265	0	0.344736
ENSG00000144028	SNRNP200	small nuclear ribonucleoprotein 200kDa (U5)	3.5	6.16	0.8	8.2	0.0265	0	0.344517
ENSG00000164961	KIAA0196	KIAA0196	1.8	6.16	0.3	5	0.0265	0	0.344298
ENSG00000149308	NPAT	nuclear protein, ataxia-telangiectasia locus	-1.6	6.16	-4.3	1.7	0.0265	0	0.344079
ENSG00000168916	ZNF608	zinc finger protein 608	-1.9	6.15	-4.4	-0.2	0.0266	0	0.345159
ENSG00000159459	UBR1	ubiquitin protein ligase E3 component n-recognin 1	2	6.15	-0.3	5.5	0.0266	0	0.34494
ENSG00000127054	CPSF3L	cleavage and polyadenylation specific factor 3-like	2.8	6.15	0.3	6.7	0.0266	0	0.344721
ENSG00000182218	HHIPL1	HHIP-like 1	2.4	6.15	0.2	5.6	0.0266	0	0.344503
ENSG00000186212	SOWAHB	sosondowah ankyrin repeat domain family member B	1.8	6.15	0.2	5.4	0.0266	0	0.344285
ENSG00000145708	CRHBP	corticotropin releasing hormone binding protein	5	6.15	2.1	10	0.0266	0	0.344067
ENSG00000148773	MKI67	marker of proliferation Ki-67	-3.1	6.14	-8	2.8	0.0267	0	0.345142
ENSG00000197961	ZNF121	zinc finger protein 121	-2.4	6.14	-6.6	-0.2	0.0267	0	0.344924
ENSG00000258083	OR9A4	olfactory receptor, family 9, subfamily A, member 4	-1.7	6.13	-4.2	-0.1	0.0268	0	0.345997
ENSG00000170175	CHRNB1	cholinergic receptor, nicotinic, beta 1 (muscle)	-1.7	6.13	-4.7	0	0.0268	0	0.345779
ENSG00000102934	PLLP	plasmolipin	2.1	6.13	0.2	4.9	0.0268	0	0.345561
ENSG00000146872	TLK2	tousled-like kinase 2	3.2	6.13	0.6	6.5	0.0268	0	0.345343
ENSG00000166289	PLEKHF1	pleckstrin homology domain containing, family F (with FYVE domain) member 1	1.5	6.13	0.3	4.1	0.0268	0	0.345126
ENSG00000006606	CCL26	chemokine (C-C motif) ligand 26	2.9	6.13	0.3	6.5	0.0268	0	0.344909
ENSG00000175766	EIF4E1B	eukaryotic translation initiation factor 4E family member 1B	-2.8	6.12	-7.1	-0.3	0.0269	0	0.345978
ENSG00000188624	IGFL3	IGF-like family member 3	1.5	6.12	0.3	3.5	0.0269	0	0.345761
ENSG00000181963	OR52K2	olfactory receptor, family 52, subfamily K, member 2	2.6	6.12	0.2	6.8	0.0269	0	0.345543
ENSG00000115484	CCT4	chaperonin containing TCP1, subunit 4 (delta)	2.9	6.12	0.7	7.1	0.0269	0	0.345326
ENSG00000143164	DCAF6	DDB1 and CUL4 associated factor 6	2	6.11	0.2	6.6	0.0271	0	0.347676
ENSG00000120963	ZNF706	zinc finger protein 706	2.4	6.11	0.3	5.4	0.0271	0	0.347458
ENSG00000196167	COLCA1	colorectal cancer associated 1	-1.5	6.11	-3.8	-0.1	0.0271	0	0.34724
ENSG00000231192	OR5H1	olfactory receptor, family 5, subfamily H, member 1	-1.5	6.11	-4.9	0.5	0.0271	0	0.347023
ENSG00000125454	SLC25A19	solute carrier family 25 (mitochondrial thiamine pyrophosphate carrier), member 19	2.2	6.1	0.2	4.9	0.0272	0	0.348085
ENSG00000117054	ACADM	acyl-CoA dehydrogenase, C-4 to C-12 straight chain	3.5	6.1	-3.2	9	0.0272	0	0.347867
ENSG00000142609	C1ORF222	N/A	2.1	6.1	0	5.2	0.0272	0	0.34765
ENSG00000270099	RP11-248J23.7	N/A	-1.9	6.1	-6	0.5	0.0272	0	0.347433
ENSG00000155066	PROM2	prominin 2	-1.6	6.1	-3.5	-0.2	0.0272	0	0.347216
ENSG00000168124	OR1F1	olfactory receptor, family 1, subfamily F, member 1	-1.5	6.1	-3.4	-0.2	0.0272	0	0.346999
ENSG00000244414	CFHR1	complement factor H-related 1	-1.6	6.09	-4.2	-0.1	0.0273	0	0.348058
ENSG00000198339	HIST1H4I	histone cluster 1, H4i	-1.4	6.09	-4.4	0.1	0.0273	0	0.347841
ENSG00000167526	RPL13	ribosomal protein L13	-1.5	6.09	-4.1	1.2	0.0273	0	0.347625
ENSG00000147813	NAPRT1	N/A	2.1	6.09	-0.4	5.6	0.0273	0	0.347408
ENSG00000002726	AOC1	amine oxidase, copper containing 1	-1.6	6.09	-4	-0.1	0.0273	0	0.347192
ENSG00000143390	RFX5	regulatory factor X, 5 (influences HLA class II expression)	2.6	6.09	-0.2	7.1	0.0273	0	0.346976
ENSG00000163611	SPICE1	spindle and centriole associated protein 1	2.3	6.09	0.2	6.4	0.0273	0	0.346761
ENSG00000106823	ECM2	extracellular matrix protein 2, female organ and adipocyte specific	3.3	6.08	0.6	7.9	0.0274	0	0.347815
ENSG00000236980	C3ORF84	chromosome 3 open reading frame 84	-1.7	6.08	-4.8	3.5	0.0274	0	0.347599
ENSG00000100056	DGCR14	DiGeorge syndrome critical region gene 14	3.6	6.07	1	10	0.0275	0	0.348652
ENSG00000091106	NLRC4	NLR family, CARD domain containing 4	1.8	6.07	0	6.1	0.0275	0	0.348436
ENSG00000062370	ZNF112	zinc finger protein 112	1.9	6.07	-0.9	5.2	0.0275	0	0.34822
ENSG00000143632	ACTA1	actin, alpha 1, skeletal muscle	-1.4	6.07	-4.3	-0.1	0.0275	0	0.348004
ENSG00000100053	CRYBB3	crystallin, beta B3	1.7	6.06	0.2	5.2	0.0276	0	0.349054
ENSG00000163421	PROK2	prokineticin 2	-1.7	6.06	-4.4	0.1	0.0276	0	0.348838
ENSG00000171606	ZNF274	zinc finger protein 274	2.7	6.06	0.3	6.5	0.0276	0	0.348623
ENSG00000176515	AL033381.1	N/A	-2.3	6.05	-6.5	-0.2	0.0277	0	0.34967
ENSG00000229453	SPINK8	serine peptidase inhibitor, Kazal type 8 (putative)	-1.7	6.05	-4.6	0	0.0277	0	0.349454
ENSG00000181392	SYNE4	spectrin repeat containing, nuclear envelope family member 4	1.4	6.05	0.1	3.9	0.0277	0	0.349239
ENSG00000114904	NEK4	NIMA-related kinase 4	1.9	6.05	-0.2	5	0.0277	0	0.349023
ENSG00000178980	SEPW1	selenoprotein W, 1	2.8	6.05	0.4	7.9	0.0277	0	0.348808
ENSG00000161800	RACGAP1	Rac GTPase activating protein 1	2.8	6.04	0.5	6.5	0.0279	0	0.351111
ENSG00000187193	MT1X	metallothionein 1X	2.3	6.03	0.2	5.5	0.028	0	0.352153
ENSG00000182950	ODF3L1	outer dense fiber of sperm tails 3-like 1	3.2	6.03	0.4	7.3	0.028	0	0.351936
ENSG00000089486	CDIP1	cell death-inducing p53 target 1	-1.5	6.03	-6.8	1	0.028	0	0.35172
ENSG00000165617	DACT1	dishevelled-binding antagonist of beta-catenin 1	2.4	6.03	0.2	5.5	0.028	0	0.351504
ENSG00000182853	VMO1	vitelline membrane outer layer 1 homolog (chicken)	-1.5	6.03	-4.5	0.1	0.028	0	0.351288
ENSG00000188636	LDOC1L	leucine zipper, down-regulated in cancer 1-like	2.5	6.03	0.1	6.1	0.028	0	0.351073
ENSG00000256453	DND1	DND microRNA-mediated repression inhibitor 1	-1.8	6.03	-3.9	-0.3	0.028	0	0.350858
ENSG00000100296	THOC5	THO complex 5	2.8	6.03	0.4	6.7	0.028	0	0.350643
ENSG00000174720	LARP7	La ribonucleoprotein domain family, member 7	-1.4	6.03	-5.3	-0.1	0.028	0	0.350428
ENSG00000183784	C9ORF66	chromosome 9 open reading frame 66	2.4	6.02	0.3	6.1	0.0281	0	0.351465
ENSG00000269804	AL353354.2	N/A	2.4	6.02	0.3	5.3	0.0281	0	0.35125
ENSG00000078699	CBFA2T2	core-binding factor, runt domain, alpha subunit 2; translocated to, 2	-2	6.02	-4.8	-0.2	0.0281	0	0.351035
ENSG00000211734	TRBV5-1	T cell receptor beta variable 5-1	-2.1	6.02	-5.8	3.3	0.0281	0	0.350821
ENSG00000131981	LGALS3	lectin, galactoside-binding, soluble, 3	4.1	6.02	-1.7	10	0.0281	0	0.350607
ENSG00000259009	TPRX2P	tetra-peptide repeat homeobox 2 pseudogene	1.5	6.02	0	4	0.0281	0	0.350393
ENSG00000124151	NCOA3	nuclear receptor coactivator 3	2.1	6.02	0	4.7	0.0281	0	0.35018
ENSG00000241978	AKAP2	A kinase (PRKA) anchor protein 2	2.2	6.01	0.2	5.6	0.0283	0	0.352457
ENSG00000185811	IKZF1	IKAROS family zinc finger 1 (Ikaros)	2.4	6.01	0.3	6.2	0.0283	0	0.352243
ENSG00000156414	TDRD9	tudor domain containing 9	1.8	6.01	0.1	6.1	0.0283	0	0.352029
ENSG00000189233	NUGGC	nuclear GTPase, germinal center associated	-1.8	6.01	-3.8	-0.3	0.0283	0	0.351815
ENSG00000164172	MOCS2	molybdenum cofactor synthesis 2	-1.4	6.01	-4.4	-0.1	0.0283	0	0.351601
ENSG00000105281	SLC1A5	solute carrier family 1 (neutral amino acid transporter), member 5	1.8	6.01	0.2	5	0.0283	0	0.351387
ENSG00000112697	TMEM30A	transmembrane protein 30A	1.3	6	0.1	3.5	0.0284	0	0.352415
ENSG00000108264	TADA2A	transcriptional adaptor 2A	-1.7	6	-5.2	1.9	0.0284	0	0.352201
ENSG00000237787	C3ORF79	chromosome 3 open reading frame 79	-1.5	6	-4.9	0.1	0.0284	0	0.351988
ENSG00000108947	EFNB3	ephrin-B3	1.4	6	-0.1	4.5	0.0284	0	0.351775
ENSG00000088782	DEFB127	defensin, beta 127	-1.4	6	-4.9	-0.1	0.0284	0	0.351562
ENSG00000211941	IGHV3-11	immunoglobulin heavy variable 3-11 (gene/pseudogene)	1.8	6	-0.5	4.6	0.0284	0	0.351349
ENSG00000154080	CHST9	carbohydrate (N-acetylgalactosamine 4-0) sulfotransferase 9	1.8	5.99	0	4.6	0.0285	0	0.352373
ENSG00000052802	MSMO1	methylsterol monooxygenase 1	1.3	5.98	0.1	3.5	0.0286	0	0.353396
ENSG00000123405	NFE2	nuclear factor, erythroid 2	-1.9	5.98	-5.7	0	0.0286	0	0.353182
ENSG00000087274	ADD1	adducin 1 (alpha)	-1.6	5.98	-4.7	-0.1	0.0286	0	0.352969
ENSG00000186868	MAPT	microtubule-associated protein tau	-1.5	5.98	-3.6	-0.1	0.0286	0	0.352756
ENSG00000174343	CHRNA9	cholinergic receptor, nicotinic, alpha 9 (neuronal)	-1.3	5.98	-3.7	0.5	0.0286	0	0.352544
ENSG00000145386	CCNA2	cyclin A2	-1.5	5.97	-3.9	-0.1	0.0287	0	0.353563
ENSG00000172155	LCE1D	late cornified envelope 1D	1.6	5.96	0.1	3.9	0.0288	0	0.354582
ENSG00000151148	UBE3B	ubiquitin protein ligase E3B	-1.7	5.96	-4.3	0.5	0.0288	0	0.354368
ENSG00000117682	DHDDS	dehydrodolichyl diphosphate synthase	3.1	5.96	0.9	6.7	0.0288	0	0.354155
ENSG00000250571	GLI4	GLI family zinc finger 4	-1.5	5.95	-4.3	0.3	0.0289	0	0.355171
ENSG00000073921	PICALM	phosphatidylinositol binding clathrin assembly protein	-1.8	5.94	-4.7	2.7	0.0291	0	0.357414
ENSG00000169031	COL4A3	collagen, type IV, alpha 3 (Goodpasture antigen)	2.5	5.94	0.1	5.8	0.0291	0	0.3572
ENSG00000156273	BACH1	BTB and CNC homology 1, basic leucine zipper transcription factor 1	-1.4	5.94	-4.2	-0.1	0.0291	0	0.356986
ENSG00000101868	POLA1	polymerase (DNA directed), alpha 1, catalytic subunit	2.9	5.94	0.3	6.4	0.0291	0	0.356772
ENSG00000188994	ZNF292	zinc finger protein 292	1.3	5.93	-1.4	4.4	0.0292	0	0.357783
ENSG00000064703	DDX20	DEAD (Asp-Glu-Ala-Asp) box polypeptide 20	-1.8	5.93	-4.4	-0.2	0.0292	0	0.357569
ENSG00000078177	N4BP2	NEDD4 binding protein 2	2.8	5.93	0.3	6.9	0.0292	0	0.357355
ENSG00000118246	FASTKD2	FAST kinase domains 2	1.7	5.93	0.2	5.6	0.0292	0	0.357141
ENSG00000171433	GLOD5	glyoxalase domain containing 5	1.7	5.93	0.1	4.1	0.0292	0	0.356928
ENSG00000140471	LINS	lines homolog (Drosophila)	1.3	5.92	0.1	3	0.0293	0	0.357936
ENSG00000114026	OGG1	8-oxoguanine DNA glycosylase	2.2	5.92	0.1	5.6	0.0293	0	0.357722
ENSG00000057593	F7	coagulation factor VII (serum prothrombin conversion accelerator)	-1.8	5.92	-5	0.2	0.0293	0	0.357509
ENSG00000060982	BCAT1	branched chain amino-acid transaminase 1, cytosolic	-1.8	5.92	-4.7	1.3	0.0293	0	0.357296
ENSG00000188191	PRKAR1B	protein kinase, cAMP-dependent, regulatory, type I, beta	-1.9	5.92	-5.1	-0.1	0.0293	0	0.357083
ENSG00000144848	ATG3	autophagy related 3	-1.8	5.91	-4.6	-0.1	0.0295	0	0.359306
ENSG00000267964	AC022400.2	N/A	2.2	5.91	0.3	5.5	0.0295	0	0.359092
ENSG00000180773	SLC36A4	solute carrier family 36 (proton/amino acid symporter), member 4	1.9	5.91	-0.8	4.7	0.0295	0	0.358879
ENSG00000141644	MBD1	methyl-CpG binding domain protein 1	2.1	5.91	-2.3	6.9	0.0295	0	0.358665
ENSG00000162734	PEA15	phosphoprotein enriched in astrocytes 15	1.4	5.91	-0.8	4.4	0.0295	0	0.358452
ENSG00000189325	C6ORF222	chromosome 6 open reading frame 222	1.6	5.9	0.1	3.7	0.0296	0	0.359454
ENSG00000177646	ACAD9	acyl-CoA dehydrogenase family, member 9	2.1	5.9	-0.3	6	0.0296	0	0.35924
ENSG00000178031	ADAMTSL1	ADAMTS-like 1	2.5	5.9	0.2	6.2	0.0296	0	0.359027
ENSG00000228567	VN1R4	vomeronasal 1 receptor 4	3	5.9	0.1	7.9	0.0296	0	0.358814
ENSG00000161133	USP41	ubiquitin specific peptidase 41	-1.5	5.9	-3.8	-0.1	0.0296	0	0.358602
ENSG00000170178	HOXD12	homeobox D12	2.2	5.9	-0.5	7.6	0.0296	0	0.35839
ENSG00000134160	TRPM1	transient receptor potential cation channel, subfamily M, member 1	1.8	5.9	0.1	5.6	0.0296	0	0.358178
ENSG00000101247	NDUFAF5	NADH dehydrogenase (ubiquinone) complex I, assembly factor 5	3.9	5.9	0.5	9.3	0.0296	0	0.357966
ENSG00000241878	PISD	phosphatidylserine decarboxylase	5.2	5.9	1.4	10.8	0.0296	0	0.357754
ENSG00000182634	OR10G7	olfactory receptor, family 10, subfamily G, member 7	1.4	5.9	-0.1	4.1	0.0296	0	0.357543
ENSG00000125850	OVOL2	ovo-like zinc finger 2	1.5	5.9	0.2	4	0.0296	0	0.357332
ENSG00000171724	VAT1L	vesicle amine transport 1-like	-1.4	5.9	-3.8	-0.1	0.0296	0	0.357121
ENSG00000111254	AKAP3	A kinase (PRKA) anchor protein 3	-1.2	5.9	-4.3	-0.1	0.0296	0	0.35691
ENSG00000174327	SLC16A13	solute carrier family 16, member 13	2.8	5.89	0	7.2	0.0297	0	0.357905
ENSG00000159899	NPR2	natriuretic peptide receptor 2	3	5.89	0.3	6.5	0.0297	0	0.357694
ENSG00000185115	NDNL2	necdin-like 2	-1.6	5.89	-4.6	-0.1	0.0297	0	0.357484
ENSG00000104375	STK3	serine/threonine kinase 3	1.8	5.89	-2.5	5.7	0.0297	0	0.357274
ENSG00000007168	PAFAH1B1	platelet-activating factor acetylhydrolase 1b, regulatory subunit 1 (45kDa)	-1.8	5.89	-5.2	2.9	0.0297	0	0.357063
ENSG00000120784	ZFP30	ZFP30 zinc finger protein	1.4	5.89	0.2	3.5	0.0297	0	0.356854
ENSG00000188846	RPL14	ribosomal protein L14	1.7	5.88	0.1	4.3	0.0299	0	0.359046
ENSG00000105695	MAG	myelin associated glycoprotein	1.4	5.88	0.1	3	0.0299	0	0.358835
ENSG00000196187	TMEM63A	transmembrane protein 63A	1.7	5.88	0.1	4.5	0.0299	0	0.358625
ENSG00000178776	C5ORF46	chromosome 5 open reading frame 46	3.6	5.88	0.4	8.2	0.0299	0	0.358414
ENSG00000187257	RSBN1L	round spermatid basic protein 1-like	-1.7	5.88	-4.1	0.1	0.0299	0	0.358204
ENSG00000106344	RBM28	RNA binding motif protein 28	-1.3	5.88	-3.6	9.3	0.0299	0	0.357995
ENSG00000185821	OR6C76	olfactory receptor, family 6, subfamily C, member 76	-1.7	5.88	-5.3	0.2	0.0299	0	0.357785
ENSG00000164125	FAM198B	family with sequence similarity 198, member B	-1.6	5.87	-4.7	0.1	0.03	0	0.358772
ENSG00000129151	BBOX1	butyrobetaine (gamma), 2-oxoglutarate dioxygenase (gamma-butyrobetaine hydroxylase) 1	4.2	5.87	-0.8	9	0.03	0	0.358562
ENSG00000182199	SHMT2	serine hydroxymethyltransferase 2 (mitochondrial)	3	5.87	0.4	6.7	0.03	0	0.358353
ENSG00000100897	DCAF11	DDB1 and CUL4 associated factor 11	2.8	5.87	0.3	7.8	0.03	0	0.358144
ENSG00000146147	MLIP	muscular LMNA-interacting protein	2.4	5.87	-0.3	5.9	0.03	0	0.357935
ENSG00000150776	C11ORF57	chromosome 11 open reading frame 57	1.6	5.87	0.1	4.1	0.03	0	0.357726
ENSG00000179388	EGR3	early growth response 3	-1.3	5.87	-3.4	0	0.03	0	0.357517
ENSG00000163517	HDAC11	histone deacetylase 11	-1.3	5.87	-3.2	-0.1	0.03	0	0.357309
ENSG00000204410	MSH5	mutS homolog 5	-1.6	5.87	-4	-0.1	0.03	0	0.357101
ENSG00000178338	ZNF354B	zinc finger protein 354B	2.2	5.86	0.2	5.5	0.0301	0	0.358083
ENSG00000168556	ING2	inhibitor of growth family, member 2	-1.5	5.86	-4.2	0.4	0.0301	0	0.357875
ENSG00000176428	VPS37D	vacuolar protein sorting 37 homolog D (S. cerevisiae)	2.5	5.86	0.2	5.8	0.0301	0	0.357667
ENSG00000069849	ATP1B3	ATPase, Na+/K+ transporting, beta 3 polypeptide	2.7	5.86	0.2	7	0.0301	0	0.357459
ENSG00000084090	STARD7	StAR-related lipid transfer (START) domain containing 7	2.4	5.86	0.3	5.6	0.0301	0	0.357252
ENSG00000122254	HS3ST2	heparan sulfate (glucosamine) 3-O-sulfotransferase 2	1.9	5.85	0.1	5.8	0.0302	0	0.358231
ENSG00000112592	TBP	TATA box binding protein	-1.5	5.85	-3.7	-0.1	0.0302	0	0.358023
ENSG00000183943	PRKX	protein kinase, X-linked	2.4	5.85	0.2	8.4	0.0302	0	0.357816
ENSG00000157322	CLEC18A	C-type lectin domain family 18, member A	1.7	5.85	0	4	0.0302	0	0.357609
ENSG00000187862	TTC24	tetratricopeptide repeat domain 24	4.7	5.84	-0.9	11	0.0303	0	0.358585
ENSG00000144724	PTPRG	protein tyrosine phosphatase, receptor type, G	2.3	5.84	0.2	7.3	0.0303	0	0.358378
ENSG00000157111	TMEM171	transmembrane protein 171	-1.7	5.84	-4.3	0.4	0.0303	0	0.358171
ENSG00000138356	AOX1	aldehyde oxidase 1	2.1	5.83	0.3	6.5	0.0304	0	0.359145
ENSG00000182325	FBXL6	F-box and leucine-rich repeat protein 6	3.1	5.83	0.2	7	0.0304	0	0.358938
ENSG00000184144	CNTN2	contactin 2 (axonal)	-1.4	5.82	-4	4.9	0.0306	0	0.361091
ENSG00000110002	VWA5A	von Willebrand factor A domain containing 5A	1.8	5.82	0.1	4.2	0.0306	0	0.360882
ENSG00000166707	ZCCHC18	zinc finger, CCHC domain containing 18	2.2	5.82	0.1	6.2	0.0306	0	0.360674
ENSG00000268798	AC027307.3	N/A	-1.7	5.82	-4.6	0.1	0.0306	0	0.360467
ENSG00000168748	CA7	carbonic anhydrase VII	-1.4	5.82	-3.9	0.3	0.0306	0	0.360259
ENSG00000141639	MAPK4	mitogen-activated protein kinase 4	2.4	5.81	-0.2	5.9	0.0307	0	0.361228
ENSG00000172428	MYEOV2	myeloma overexpressed 2	1.9	5.81	-3.2	5.9	0.0307	0	0.361021
ENSG00000156222	SLC28A1	solute carrier family 28 (concentrative nucleoside transporter), member 1	3.2	5.8	0.6	7	0.0308	0	0.361989
ENSG00000136935	GOLGA1	golgin A1	1.4	5.8	0.1	3.8	0.0308	0	0.361781
ENSG00000063180	CA11	carbonic anhydrase XI	1.6	5.8	0.1	4.2	0.0308	0	0.361573
ENSG00000172493	AFF1	AF4/FMR2 family, member 1	-1.6	5.8	-4.5	0	0.0308	0	0.361365
ENSG00000076641	PAG1	phosphoprotein membrane anchor with glycosphingolipid microdomains 1	-1.7	5.8	-4.6	0.8	0.0308	0	0.361158
ENSG00000141424	SLC39A6	solute carrier family 39 (zinc transporter), member 6	1.7	5.79	-0.5	4.5	0.0309	0	0.362123
ENSG00000124257	NEURL2	neuralized E3 ubiquitin protein ligase 2	-2.2	5.79	-5.4	-0.1	0.0309	0	0.361916
ENSG00000101745	ANKRD12	ankyrin repeat domain 12	-1.7	5.79	-5.2	0.7	0.0309	0	0.361709
ENSG00000148840	PPRC1	peroxisome proliferator-activated receptor gamma, coactivator-related 1	5.7	5.79	1.5	12	0.0309	0	0.361502
ENSG00000144357	UBR3	ubiquitin protein ligase E3 component n-recognin 3 (putative)	1.4	5.78	0.1	3.7	0.0311	0	0.363634
ENSG00000117425	PTCH2	patched 2	-1.6	5.78	-4	-0.1	0.0311	0	0.363426
ENSG00000118707	TGIF2	TGFB-induced factor homeobox 2	-2	5.78	-6	2.5	0.0311	0	0.363218
ENSG00000263002	ZNF234	zinc finger protein 234	2	5.77	0.1	5.2	0.0312	0	0.364178
ENSG00000086544	ITPKC	inositol-trisphosphate 3-kinase C	1.5	5.77	0.1	3.6	0.0312	0	0.36397
ENSG00000213030	CGB8	chorionic gonadotropin, beta polypeptide 8	1.5	5.77	0	3.7	0.0312	0	0.363763
ENSG00000221886	C5ORF54	N/A	1.8	5.77	0.2	4.4	0.0312	0	0.363556
ENSG00000126759	CFP	complement factor properdin	1.5	5.77	-0.1	3.9	0.0312	0	0.363349
ENSG00000006831	ADIPOR2	adiponectin receptor 2	2.7	5.77	0.4	7.9	0.0312	0	0.363142
ENSG00000169371	SNUPN	snurportin 1	2.4	5.76	0.3	5.9	0.0314	0	0.365262
ENSG00000116833	NR5A2	nuclear receptor subfamily 5, group A, member 2	2.3	5.76	0.1	5.4	0.0314	0	0.365054
ENSG00000178209	PLEC	plectin	-2.1	5.76	-5.4	0.9	0.0314	0	0.364847
ENSG00000139055	ERP27	endoplasmic reticulum protein 27	-2	5.76	-5	0.4	0.0314	0	0.364639
ENSG00000136942	RPL35	ribosomal protein L35	4.6	5.76	1.5	10	0.0314	0	0.364432
ENSG00000158882	TOMM40L	translocase of outer mitochondrial membrane 40 homolog (yeast)-like	-1.7	5.75	-4.5	-0.1	0.0315	0	0.365386
ENSG00000023171	GRAMD1B	GRAM domain containing 1B	2.1	5.75	0.1	6.2	0.0315	0	0.365179
ENSG00000083223	ZCCHC6	zinc finger, CCHC domain containing 6	2	5.75	0.1	5.1	0.0315	0	0.364972
ENSG00000116266	STXBP3	syntaxin binding protein 3	4	5.74	1	9.7	0.0316	0	0.365923
ENSG00000162402	USP24	ubiquitin specific peptidase 24	1.4	5.74	0.2	3.3	0.0316	0	0.365716
ENSG00000176083	ZNF683	zinc finger protein 683	3.8	5.74	0.6	8.8	0.0316	0	0.365509
ENSG00000151116	UEVLD	UEV and lactate/malate dehyrogenase domains	3.4	5.74	0.3	7.5	0.0316	0	0.365302
ENSG00000168906	MAT2A	methionine adenosyltransferase II, alpha	4	5.74	0.7	9	0.0316	0	0.365096
ENSG00000131398	KCNC3	potassium voltage-gated channel, Shaw-related subfamily, member 3	1.5	5.74	0.1	3.7	0.0316	0	0.36489
ENSG00000255823	MTRNR2L8	MT-RNR2-like 8	2.5	5.74	0.8	5.8	0.0316	0	0.364684
ENSG00000139324	TMTC3	transmembrane and tetratricopeptide repeat containing 3	-1.3	5.73	-5.2	0	0.0318	0	0.366785
ENSG00000164053	ATRIP	ATR interacting protein	1.6	5.73	0.1	4.5	0.0318	0	0.366578
ENSG00000211645	IGLV1-50	immunoglobulin lambda variable 1-50 (non-functional)	-2	5.73	-5	1.1	0.0318	0	0.366372
ENSG00000083520	DIS3	DIS3 exosome endoribonuclease and 3'-5' exoribonuclease	2.4	5.73	0.1	6.2	0.0318	0	0.366166
ENSG00000113580	NR3C1	nuclear receptor subfamily 3, group C, member 1 (glucocorticoid receptor)	-2.9	5.73	-7.1	-0.3	0.0318	0	0.365959
ENSG00000188554	NBR1	neighbor of BRCA1 gene 1	-1.5	5.73	-4.4	0.1	0.0318	0	0.365754
ENSG00000120457	KCNJ5	potassium inwardly-rectifying channel, subfamily J, member 5	1.6	5.73	0.1	4.6	0.0318	0	0.365548
ENSG00000159692	CTBP1	C-terminal binding protein 1	-1.6	5.73	-3.9	-0.1	0.0318	0	0.365343
ENSG00000181029	TRAPPC5	trafficking protein particle complex 5	-1.7	5.73	-4.6	-0.1	0.0318	0	0.365138
ENSG00000143507	DUSP10	dual specificity phosphatase 10	2.4	5.72	0.2	6.6	0.0319	0	0.36608
ENSG00000156687	UNC5D	unc-5 homolog D (C. elegans)	-2.6	5.72	-6.3	-0.2	0.0319	0	0.365875
ENSG00000110435	PDHX	pyruvate dehydrogenase complex, component X	1.5	5.72	0.1	5.3	0.0319	0	0.36567
ENSG00000138347	MYPN	myopalladin	1.6	5.72	-0.3	3.9	0.0319	0	0.365465
ENSG00000074771	NOX3	NADPH oxidase 3	2.1	5.72	0	5.8	0.0319	0	0.36526
ENSG00000181481	RNF135	ring finger protein 135	-2.1	5.72	-5.5	-0.1	0.0319	0	0.365056
ENSG00000099942	CRKL	v-crk avian sarcoma virus CT10 oncogene homolog-like	-1.6	5.71	-4.5	0.4	0.032	0	0.365996
ENSG00000214215	C12ORF74	chromosome 12 open reading frame 74	2	5.71	0.2	5.2	0.032	0	0.365791
ENSG00000269396	AC187652.1	N/A	2.4	5.71	0.3	5.7	0.032	0	0.365587
ENSG00000100281	HMGXB4	HMG box domain containing 4	3.4	5.71	0.6	7.2	0.032	0	0.365382
ENSG00000069431	ABCC9	ATP-binding cassette, sub-family C (CFTR/MRP), member 9	-2.1	5.7	-5.3	-0.1	0.0322	0	0.367461
ENSG00000213462	ERV3-1	endogenous retrovirus group 3, member 1	4.5	5.7	0.6	11	0.0322	0	0.367256
ENSG00000189159	HN1	hematological and neurological expressed 1	2	5.7	0.2	4.4	0.0322	0	0.367051
ENSG00000132749	MTL5	metallothionein-like 5, testis-specific (tesmin)	3.8	5.7	0.4	9.3	0.0322	0	0.366847
ENSG00000173627	APOBEC4	apolipoprotein B mRNA editing enzyme, catalytic polypeptide-like 4 (putative)	-3	5.69	-6.7	-0.6	0.0323	0	0.367781
ENSG00000126785	RHOJ	ras homolog family member J	1.5	5.69	-0.1	3.7	0.0323	0	0.367577
ENSG00000068796	KIF2A	kinesin heavy chain member 2A	-1.5	5.69	-4.5	1.1	0.0323	0	0.367372
ENSG00000181315	ZNF322	zinc finger protein 322	4.5	5.69	1.2	11	0.0323	0	0.367168
ENSG00000161914	ZNF653	zinc finger protein 653	-1.6	5.69	-4.6	2	0.0323	0	0.366964
ENSG00000120837	NFYB	nuclear transcription factor Y, beta	2.6	5.68	0.3	6.5	0.0324	0	0.367896
ENSG00000100023	PPIL2	peptidylprolyl isomerase (cyclophilin)-like 2	1.5	5.68	0.1	3.3	0.0324	0	0.367691
ENSG00000114999	TTL	tubulin tyrosine ligase	-1.8	5.68	-4.4	1.7	0.0324	0	0.367488
ENSG00000147082	CCNB3	cyclin B3	1.8	5.68	0	5.3	0.0324	0	0.367284
ENSG00000149591	TAGLN	transgelin	1.9	5.67	0.1	5.1	0.0326	0	0.369346
ENSG00000122585	NPY	neuropeptide Y	-1.6	5.67	-4.6	2.6	0.0326	0	0.369142
ENSG00000162604	TM2D1	TM2 domain containing 1	1.7	5.67	0.1	4.3	0.0326	0	0.368937
ENSG00000166206	GABRB3	gamma-aminobutyric acid (GABA) A receptor, beta 3	2	5.67	0.2	4.7	0.0326	0	0.368733
ENSG00000115421	PAPOLG	poly(A) polymerase gamma	2	5.67	-0.6	5.1	0.0326	0	0.36853
ENSG00000119396	RAB14	RAB14, member RAS oncogene family	1.4	5.67	0.2	4	0.0326	0	0.368326
ENSG00000141744	PNMT	phenylethanolamine N-methyltransferase	2.5	5.67	-0.3	6.7	0.0326	0	0.368123
ENSG00000113761	ZNF346	zinc finger protein 346	2.2	5.66	0	6.9	0.0327	0	0.369048
ENSG00000163029	SMC6	structural maintenance of chromosomes 6	-1.6	5.66	-4.8	0	0.0327	0	0.368844
ENSG00000205678	TECRL	trans-2,3-enoyl-CoA reductase-like	-1.5	5.66	-4	0	0.0327	0	0.368641
ENSG00000130540	SULT4A1	sulfotransferase family 4A, member 1	2.5	5.66	-0.8	6.1	0.0327	0	0.368438
ENSG00000152192	POU4F1	POU class 4 homeobox 1	-1.7	5.66	-4.8	-0.2	0.0327	0	0.368235
ENSG00000131037	EPS8L1	EPS8-like 1	1.2	5.66	-0.1	3.7	0.0327	0	0.368032
ENSG00000188643	S100A16	S100 calcium binding protein A16	1.6	5.66	-0.9	4.8	0.0327	0	0.36783
ENSG00000130165	ELOF1	elongation factor 1 homolog (S. cerevisiae)	-1.5	5.65	-3.9	-0.1	0.0329	0	0.369876
ENSG00000142513	ACPT	acid phosphatase, testicular	1.7	5.65	-0.3	5.8	0.0329	0	0.369673
ENSG00000198821	CD247	CD247 molecule	-1.6	5.64	-4.3	0	0.033	0	0.370593
ENSG00000162594	IL23R	interleukin 23 receptor	-1.7	5.64	-4.5	1.9	0.033	0	0.37039
ENSG00000164329	PAPD4	PAP associated domain containing 4	1.8	5.64	0	4.9	0.033	0	0.370187
ENSG00000122547	EEPD1	endonuclease/exonuclease/phosphatase family domain containing 1	-1.6	5.64	-4	4.2	0.033	0	0.369984
ENSG00000139193	CD27	CD27 molecule	1.8	5.64	-0.3	5.7	0.033	0	0.369781
ENSG00000159588	CCDC17	coiled-coil domain containing 17	3.1	5.64	0.3	6.8	0.033	0	0.369578
ENSG00000112182	BACH2	BTB and CNC homology 1, basic leucine zipper transcription factor 2	1.9	5.64	-0.1	5	0.033	0	0.369376
ENSG00000169612	FAM103A1	family with sequence similarity 103, member A1	3.5	5.64	0.5	8.9	0.033	0	0.369174
ENSG00000204398	RP11-65D24.2	N/A	-1.7	5.64	-4.8	1.4	0.033	0	0.368972
ENSG00000185739	SRL	sarcalumenin	-1.7	5.64	-4.8	0.5	0.033	0	0.36877
ENSG00000180530	NRIP1	nuclear receptor interacting protein 1	-1.5	5.63	-3.7	0.1	0.0332	0	0.370803
ENSG00000196642	RABL6	RAB, member RAS oncogene family-like 6	1.5	5.63	-0.4	4.2	0.0332	0	0.3706
ENSG00000177257	DEFB4B	defensin, beta 4B	-1.7	5.62	-4.8	-0.2	0.0333	0	0.371514
ENSG00000182050	MGAT4C	MGAT4 family, member C	1.6	5.62	0.1	3.6	0.0333	0	0.371311
ENSG00000112619	PRPH2	peripherin 2 (retinal degeneration, slow)	-1.5	5.62	-6	0.8	0.0333	0	0.371109
ENSG00000112541	PDE10A	phosphodiesterase 10A	1.9	5.62	0	5	0.0333	0	0.370907
ENSG00000100558	PLEK2	pleckstrin 2	2.2	5.62	0.1	5.7	0.0333	0	0.370705
ENSG00000104814	MAP4K1	mitogen-activated protein kinase kinase kinase kinase 1	1.3	5.62	0	3.6	0.0333	0	0.370503
ENSG00000006074	CCL18	chemokine (C-C motif) ligand 18 (pulmonary and activation-regulated)	-1.4	5.61	-4.4	1	0.0334	0	0.371414
ENSG00000173567	GPR113	G protein-coupled receptor 113	1.8	5.61	-1.1	4.6	0.0334	0	0.371212
ENSG00000184925	LCN12	lipocalin 12	-1.4	5.61	-3.9	0.1	0.0334	0	0.37101
ENSG00000139675	HNRNPA1L2	heterogeneous nuclear ribonucleoprotein A1-like 2	3.5	5.61	0.7	8.2	0.0334	0	0.370809
ENSG00000105518	TMEM205	transmembrane protein 205	3.3	5.61	-0.3	9	0.0334	0	0.370608
ENSG00000187164	KIAA1598	KIAA1598	-1.3	5.61	-3.5	-0.1	0.0334	0	0.370407
ENSG00000086827	ZW10	zw10 kinetochore protein	2	5.61	-0.1	4.8	0.0334	0	0.370206
ENSG00000166682	TMPRSS5	transmembrane protease, serine 5	1.8	5.61	0.1	4.8	0.0334	0	0.370005
ENSG00000099998	GGT5	gamma-glutamyltransferase 5	-2	5.6	-5.3	2.1	0.0336	0	0.372019
ENSG00000086065	CHMP5	charged multivesicular body protein 5	-1.4	5.6	-4.4	0.3	0.0336	0	0.371818
ENSG00000257726	RP11-116D17.1	N/A	2.4	5.6	0.2	6.2	0.0336	0	0.371617
ENSG00000131951	LRRC9	leucine rich repeat containing 9	-2	5.6	-5.7	-0.2	0.0336	0	0.371416
ENSG00000102760	RGCC	regulator of cell cycle	2.3	5.6	0.2	5.5	0.0336	0	0.371216
ENSG00000183258	DDX41	DEAD (Asp-Glu-Ala-Asp) box polypeptide 41	2.5	5.6	0	7	0.0336	0	0.371015
ENSG00000164399	IL3	interleukin 3	-1.6	5.59	-4.1	-0.1	0.0338	0	0.373022
ENSG00000185052	SLC24A3	solute carrier family 24 (sodium/potassium/calcium exchanger), member 3	4.3	5.59	-1.4	11	0.0338	0	0.372821
ENSG00000152926	ZNF117	zinc finger protein 117	-1.5	5.59	-5.4	0.1	0.0338	0	0.37262
ENSG00000141194	OR4D1	olfactory receptor, family 4, subfamily D, member 1	1.4	5.59	0.1	3.8	0.0338	0	0.372419
ENSG00000158856	DMTN	dematin actin binding protein	3.2	5.58	0.2	7.8	0.0339	0	0.37332
ENSG00000108018	SORCS1	sortilin-related VPS10 domain containing receptor 1	1.8	5.58	-0.2	5.3	0.0339	0	0.373119
ENSG00000105198	LGALS13	lectin, galactoside-binding, soluble, 13	1.7	5.58	0.2	4.3	0.0339	0	0.372918
ENSG00000123349	PFDN5	prefoldin subunit 5	-1.5	5.57	-4.6	0.7	0.034	0	0.373817
ENSG00000253207	RP11-67H2.1	N/A	2	5.57	0.2	5.3	0.034	0	0.373616
ENSG00000006432	MAP3K9	mitogen-activated protein kinase kinase kinase 9	1.7	5.57	-0.8	4.7	0.034	0	0.373416
ENSG00000144840	RABL3	RAB, member of RAS oncogene family-like 3	-1.3	5.57	-4.6	4.6	0.034	0	0.373215
ENSG00000112062	MAPK14	mitogen-activated protein kinase 14	-1.7	5.57	-4.5	0.1	0.034	0	0.373015
ENSG00000079432	CIC	capicua transcriptional repressor	1.2	5.57	-0.1	4.1	0.034	0	0.372815
ENSG00000169139	UBE2V2	ubiquitin-conjugating enzyme E2 variant 2	-1.8	5.57	-5.6	3.9	0.034	0	0.372615
ENSG00000127415	IDUA	iduronidase, alpha-L-	2.1	5.57	0	5.5	0.034	0	0.372416
ENSG00000153391	INO80C	INO80 complex subunit C	3.5	5.56	0.6	9.1	0.0342	0	0.374406
ENSG00000081377	CDC14B	cell division cycle 14B	-1.2	5.56	-4.4	0	0.0342	0	0.374205
ENSG00000077942	FBLN1	fibulin 1	-1.7	5.56	-6.3	-0.1	0.0342	0	0.374005
ENSG00000170423	KRT78	keratin 78	1.7	5.56	-3	4.5	0.0342	0	0.373805
ENSG00000205328	OR6C65	olfactory receptor, family 6, subfamily C, member 65	-1.7	5.56	-4.4	-0.1	0.0342	0	0.373606
ENSG00000181555	SETD2	SET domain containing 2	-1.3	5.55	-3.6	1.6	0.0343	0	0.374498
ENSG00000211455	STK38L	serine/threonine kinase 38 like	-1.3	5.55	-3.5	0	0.0343	0	0.374298
ENSG00000160886	LY6K	lymphocyte antigen 6 complex, locus K	1.8	5.55	-0.2	5.1	0.0343	0	0.374099
ENSG00000142661	MYOM3	myomesin 3	4.1	5.55	0.4	8.4	0.0343	0	0.373899
ENSG00000165006	UBAP1	ubiquitin associated protein 1	4.4	5.55	1	10.6	0.0343	0	0.3737
ENSG00000171428	NAT1	N-acetyltransferase 1 (arylamine N-acetyltransferase)	-1.6	5.55	-4.1	0.1	0.0343	0	0.373501
ENSG00000155329	ZCCHC10	zinc finger, CCHC domain containing 10	2.1	5.55	0.1	5.4	0.0343	0	0.373302
ENSG00000149792	MRPL49	mitochondrial ribosomal protein L49	1.9	5.54	-0.7	4.9	0.0345	0	0.375279
ENSG00000165996	PTPLA	protein tyrosine phosphatase-like (proline instead of catalytic arginine), member A	-2.4	5.54	-6.9	1.8	0.0345	0	0.37508
ENSG00000151474	FRMD4A	FERM domain containing 4A	1.7	5.54	-0.1	3.8	0.0345	0	0.37488
ENSG00000165192	ASB11	ankyrin repeat and SOCS box containing 11, E3 ubiquitin protein ligase	4.5	5.54	1.3	10.6	0.0345	0	0.374681
ENSG00000182858	ALG12	ALG12, alpha-1,6-mannosyltransferase	4.5	5.54	1.5	10	0.0345	0	0.374482
ENSG00000257046	LST3	N/A	-1.3	5.54	-4	0.2	0.0345	0	0.374284
ENSG00000101126	ADNP	activity-dependent neuroprotector homeobox	2.7	5.53	-3.9	7.7	0.0346	0	0.37517
ENSG00000171425	ZNF581	zinc finger protein 581	1.4	5.53	-0.1	3.7	0.0346	0	0.374971
ENSG00000143614	GATAD2B	GATA zinc finger domain containing 2B	3.1	5.53	0.3	8.2	0.0346	0	0.374772
ENSG00000179913	B3GNT3	UDP-GlcNAc:betaGal beta-1,3-N-acetylglucosaminyltransferase 3	5.3	5.53	1.1	11.8	0.0346	0	0.374574
ENSG00000118420	UBE3D	ubiquitin protein ligase E3D	2.3	5.53	-0.9	6.1	0.0346	0	0.374376
ENSG00000162723	SLAMF9	SLAM family member 9	-1.6	5.53	-4.2	0.1	0.0346	0	0.374178
ENSG00000095932	C19ORF77	N/A	1.5	5.53	0	4	0.0346	0	0.37398
ENSG00000102763	VWA8	von Willebrand factor A domain containing 8	1.6	5.53	0	4.1	0.0346	0	0.373782
ENSG00000104332	SFRP1	secreted frizzled-related protein 1	2.9	5.52	-1.1	7.2	0.0347	0	0.374665
ENSG00000152518	ZFP36L2	ZFP36 ring finger protein-like 2	1.8	5.52	0.2	4.8	0.0347	0	0.374467
ENSG00000163565	IFI16	interferon, gamma-inducible protein 16	-1.6	5.52	-4.2	0.6	0.0347	0	0.37427
ENSG00000171792	RHNO1	RAD9-HUS1-RAD1 interacting nuclear orphan 1	-1.5	5.52	-3.9	0	0.0347	0	0.374072
ENSG00000221995	TIAF1	TGFB1-induced anti-apoptotic factor 1	-1.5	5.52	-5.4	0	0.0347	0	0.373875
ENSG00000164508	HIST1H2AA	histone cluster 1, H2aa	1.6	5.52	0.1	3.7	0.0347	0	0.373678
ENSG00000172716	SLFN11	schlafen family member 11	-2	5.52	-5.6	4.7	0.0347	0	0.373482
ENSG00000102178	UBL4A	ubiquitin-like 4A	1.9	5.51	0.1	4.6	0.0349	0	0.375437
ENSG00000159723	AGRP	agouti related neuropeptide	-1.7	5.51	-4.4	1	0.0349	0	0.375239
ENSG00000187244	BCAM	basal cell adhesion molecule (Lutheran blood group)	1.5	5.51	0	3.7	0.0349	0	0.375042
ENSG00000111641	NOP2	NOP2 nucleolar protein	-1.5	5.51	-4.7	0.3	0.0349	0	0.374845
ENSG00000069535	MAOB	monoamine oxidase B	-2.2	5.51	-5.9	0.2	0.0349	0	0.374648
ENSG00000188483	IER5L	immediate early response 5-like	-1.8	5.5	-5.5	0.3	0.035	0	0.375525
ENSG00000254462	TMX2-CTNND1	TMX2-CTNND1 readthrough (NMD candidate)	-1.8	5.5	-4.6	-0.5	0.035	0	0.375328
ENSG00000137055	PLAA	phospholipase A2-activating protein	1.2	5.5	0.1	3	0.035	0	0.375131
ENSG00000153531	ADPRHL1	ADP-ribosylhydrolase like 1	2.1	5.5	-0.2	5.1	0.035	0	0.374935
ENSG00000119729	RHOQ	ras homolog family member Q	5	5.49	2.1	11	0.0352	0	0.37688
ENSG00000186628	FSD2	fibronectin type III and SPRY domain containing 2	-1.9	5.49	-5.3	1.1	0.0352	0	0.376682
ENSG00000127328	RAB3IP	RAB3A interacting protein	-1.4	5.49	-5.1	0.1	0.0352	0	0.376485
ENSG00000204131	NHSL2	NHS-like 2	-1.8	5.48	-4.5	-0.1	0.0354	0	0.378427
ENSG00000175197	DDIT3	DNA-damage-inducible transcript 3	-1.4	5.48	-5.6	0.7	0.0354	0	0.378229
ENSG00000104980	TIMM44	translocase of inner mitochondrial membrane 44 homolog (yeast)	-1.9	5.48	-4.8	0.3	0.0354	0	0.378031
ENSG00000175283	DOLK	dolichol kinase	-1.6	5.48	-3.9	-0.1	0.0354	0	0.377834
ENSG00000125520	SLC2A4RG	SLC2A4 regulator	1.8	5.48	-0.1	6.3	0.0354	0	0.377637
ENSG00000156802	ATAD2	ATPase family, AAA domain containing 2	-1.5	5.48	-4.1	0	0.0354	0	0.37744
ENSG00000107859	PITX3	paired-like homeodomain 3	2.1	5.47	-0.9	5.6	0.0355	0	0.378309
ENSG00000011451	WIZ	widely interspaced zinc finger motifs	1.5	5.47	0	3.9	0.0355	0	0.378112
ENSG00000121005	CRISPLD1	cysteine-rich secretory protein LCCL domain containing 1	1.8	5.47	0.1	5.8	0.0355	0	0.377915
ENSG00000116544	DLGAP3	discs, large (Drosophila) homolog-associated protein 3	3.1	5.46	0.1	7.3	0.0357	0	0.379847
ENSG00000204140	CLPSL1	colipase-like 1	-1.4	5.46	-3.9	0.1	0.0357	0	0.379649
ENSG00000109705	NKX3-2	NK3 homeobox 2	2.8	5.46	0.2	6.8	0.0357	0	0.379452
ENSG00000120337	TNFSF18	tumor necrosis factor (ligand) superfamily, member 18	-1.7	5.46	-4.1	-0.1	0.0357	0	0.379255
ENSG00000156219	ART3	ADP-ribosyltransferase 3	-1.5	5.46	-3.8	-0.1	0.0357	0	0.379058
ENSG00000107807	TLX1	T-cell leukemia homeobox 1	1.5	5.46	-0.2	4	0.0357	0	0.378861
ENSG00000184108	TRIML1	tripartite motif family-like 1	1.9	5.46	0.1	5.3	0.0357	0	0.378664
ENSG00000108406	DHX40	DEAH (Asp-Glu-Ala-His) box polypeptide 40	3.4	5.45	-0.5	9	0.0358	0	0.379528
ENSG00000125703	ATG4C	autophagy related 4C, cysteine peptidase	-2.2	5.45	-5.5	-0.1	0.0358	0	0.379332
ENSG00000129474	AJUBA	ajuba LIM protein	3.1	5.45	0.2	7.4	0.0358	0	0.379135
ENSG00000088325	TPX2	TPX2, microtubule-associated	1.3	5.45	0	3.7	0.0358	0	0.378939
ENSG00000138075	ABCG5	ATP-binding cassette, sub-family G (WHITE), member 5	2.1	5.45	0	6.7	0.0358	0	0.378743
ENSG00000129187	DCTD	dCMP deaminase	-1.5	5.45	-4	0.3	0.0358	0	0.378547
ENSG00000149582	TMEM25	transmembrane protein 25	1.5	5.45	0.1	3.6	0.0358	0	0.378351
ENSG00000123815	ADCK4	aarF domain containing kinase 4	1.7	5.45	-0.3	4.5	0.0358	0	0.378156
ENSG00000089094	KDM2B	lysine (K)-specific demethylase 2B	1.6	5.45	0	4.2	0.0358	0	0.377961
ENSG00000171634	BPTF	bromodomain PHD finger transcription factor	2.2	5.44	0.3	5.7	0.036	0	0.379876
ENSG00000154556	SORBS2	sorbin and SH3 domain containing 2	-2	5.44	-5.9	0.5	0.036	0	0.37968
ENSG00000170209	ANKK1	ankyrin repeat and kinase domain containing 1	2.1	5.44	0.1	4.9	0.036	0	0.379485
ENSG00000103546	SLC6A2	solute carrier family 6 (neurotransmitter transporter), member 2	-2.6	5.44	-7	1	0.036	0	0.379289
ENSG00000237649	KIFC1	kinesin family member C1	1.6	5.44	0.1	4.3	0.036	0	0.379094
ENSG00000161939	RNASEK-C17ORF49	RNASEK-C17orf49 readthrough	1.6	5.44	-0.1	4.8	0.036	0	0.378899
ENSG00000158458	NRG2	neuregulin 2	-1.7	5.43	-5.2	1.9	0.0361	0	0.379756
ENSG00000109065	NAT9	N-acetyltransferase 9 (GCN5-related, putative)	1.8	5.43	0.1	5.5	0.0361	0	0.37956
ENSG00000232629	HLA-DQB2	major histocompatibility complex, class II, DQ beta 2	2.4	5.43	0.2	5.5	0.0361	0	0.379365
ENSG00000186815	TPCN1	two pore segment channel 1	1.8	5.43	0	5	0.0361	0	0.379171
ENSG00000182473	EXOC7	exocyst complex component 7	-1.3	5.43	-3.6	0.1	0.0361	0	0.378976
ENSG00000258472	RP11-192H23.4	N/A	-1.3	5.42	-3.9	0.4	0.0363	0	0.38088
ENSG00000114279	FGF12	fibroblast growth factor 12	1.9	5.42	0	4.6	0.0363	0	0.380685
ENSG00000198682	PAPSS2	3'-phosphoadenosine 5'-phosphosulfate synthase 2	2	5.42	-0.1	4.8	0.0363	0	0.380489
ENSG00000262628	OR1D5	olfactory receptor, family 1, subfamily D, member 5	-2.2	5.42	-5.7	-0.1	0.0363	0	0.380295
ENSG00000163873	GRIK3	glutamate receptor, ionotropic, kainate 3	1.7	5.41	-0.1	4.1	0.0364	0	0.381147
ENSG00000142025	DMRTC2	DMRT-like family C2	2.2	5.41	-0.9	10	0.0364	0	0.380952
ENSG00000102547	CAB39L	calcium binding protein 39-like	2.1	5.41	0	6.6	0.0364	0	0.380757
ENSG00000196774	ANKRD20A1	ankyrin repeat domain 20 family, member A1	3.9	5.4	1.1	8.6	0.0366	0	0.382653
ENSG00000139648	KRT71	keratin 71	2.1	5.4	0.1	5	0.0366	0	0.382458
ENSG00000151778	SERP2	stress-associated endoplasmic reticulum protein family member 2	3.7	5.4	0.4	9	0.0366	0	0.382263
ENSG00000166192	SENP8	SUMO/sentrin specific peptidase family member 8	1.4	5.39	0	3.6	0.0367	0	0.383111
ENSG00000023318	ERP44	endoplasmic reticulum protein 44	-1.7	5.39	-4.7	0.5	0.0367	0	0.382916
ENSG00000070018	LRP6	low density lipoprotein receptor-related protein 6	-1.7	5.39	-4.6	0.1	0.0367	0	0.382721
ENSG00000243137	PSG4	pregnancy specific beta-1-glycoprotein 4	1.5	5.38	-0.3	4.1	0.0369	0	0.38461
ENSG00000127920	GNG11	guanine nucleotide binding protein (G protein), gamma 11	3.9	5.38	1.2	9	0.0369	0	0.384414
ENSG00000127884	ECHS1	enoyl CoA hydratase, short chain, 1, mitochondrial	2.8	5.38	-0.6	8.7	0.0369	0	0.384218
ENSG00000064726	BTBD1	BTB (POZ) domain containing 1	2.1	5.37	-1.7	4.8	0.0371	0	0.386104
ENSG00000083093	PALB2	partner and localizer of BRCA2	-1.1	5.37	-4.2	0.1	0.0371	0	0.385908
ENSG00000135899	SP110	SP110 nuclear body protein	1.9	5.37	-0.2	5.3	0.0371	0	0.385712
ENSG00000105939	ZC3HAV1	zinc finger CCCH-type, antiviral 1	-1.3	5.37	-4.3	0.1	0.0371	0	0.385516
ENSG00000128563	PRKRIP1	PRKR interacting protein 1 (IL11 inducible)	1.4	5.37	-0.1	5	0.0371	0	0.38532
ENSG00000187664	HAPLN4	hyaluronan and proteoglycan link protein 4	4.6	5.36	-0.9	10	0.0372	0	0.386162
ENSG00000250120	PCDHA10	protocadherin alpha 10	3.9	5.36	-0.8	8	0.0372	0	0.385967
ENSG00000214300	SPDYE3	speedy/RINGO cell cycle regulator family member E3	1.7	5.36	-1	5.5	0.0372	0	0.385771
ENSG00000196466	ZNF799	zinc finger protein 799	4.2	5.35	0.9	8.4	0.0374	0	0.387648
ENSG00000168237	GLYCTK	glycerate kinase	1.8	5.34	-2.4	5.4	0.0375	0	0.388488
ENSG00000108561	C1QBP	complement component 1, q subcomponent binding protein	1.9	5.34	-0.4	4.9	0.0375	0	0.388291
ENSG00000142784	WDTC1	WD and tetratricopeptide repeats 1	2	5.34	-0.5	4.8	0.0375	0	0.388095
ENSG00000161040	FBXL13	F-box and leucine-rich repeat protein 13	1.8	5.33	0.1	4.9	0.0377	0	0.389967
ENSG00000243943	ZNF512	zinc finger protein 512	1.6	5.33	-0.2	4.4	0.0377	0	0.38977
ENSG00000239961	LILRA4	leukocyte immunoglobulin-like receptor, subfamily A (with TM domain), member 4	2	5.33	-0.4	5.1	0.0377	0	0.389573
ENSG00000055609	KMT2C	lysine (K)-specific methyltransferase 2C	1.4	5.33	0.1	3.7	0.0377	0	0.389376
ENSG00000164111	ANXA5	annexin A5	-1.6	5.33	-6.8	0.3	0.0377	0	0.38918
ENSG00000237388	OR4A47	olfactory receptor, family 4, subfamily A, member 47	-1.3	5.33	-4	0.9	0.0377	0	0.388983
ENSG00000172289	OR10V1	olfactory receptor, family 10, subfamily V, member 1	-2.2	5.33	-6.3	2.6	0.0377	0	0.388787
ENSG00000104941	RSPH6A	radial spoke head 6 homolog A (Chlamydomonas)	2.1	5.33	-0.3	5	0.0377	0	0.388591
ENSG00000110514	MADD	MAP-kinase activating death domain	-1.5	5.33	-4	0.3	0.0377	0	0.388395
ENSG00000167513	CDT1	chromatin licensing and DNA replication factor 1	-1.9	5.33	-5.6	0.5	0.0377	0	0.3882
ENSG00000214597	TMEM249	transmembrane protein 249	1.6	5.33	-1.7	3.9	0.0377	0	0.388005
ENSG00000159259	CHAF1B	chromatin assembly factor 1, subunit B (p60)	-1.9	5.32	-5.1	-0.2	0.0379	0	0.389867
ENSG00000110455	ACCS	1-aminocyclopropane-1-carboxylate synthase homolog (Arabidopsis)(non-functional)	-1.6	5.32	-4.3	0.2	0.0379	0	0.389671
ENSG00000204366	ZBTB12	zinc finger and BTB domain containing 12	2	5.32	0	5.2	0.0379	0	0.389475
ENSG00000115875	SRSF7	serine/arginine-rich splicing factor 7	4.2	5.32	0.9	9	0.0379	0	0.389279
ENSG00000155959	VBP1	von Hippel-Lindau binding protein 1	-1.3	5.32	-4.7	0.2	0.0379	0	0.389084
ENSG00000188229	TUBB4B	tubulin, beta 4B class IVb	-1.8	5.31	-4.9	0.2	0.038	0	0.389915
ENSG00000102195	GPR50	G protein-coupled receptor 50	2.4	5.31	-1.7	7.1	0.038	0	0.389719
ENSG00000136243	NUPL2	nucleoporin like 2	-1.2	5.31	-3.5	0.1	0.038	0	0.389524
ENSG00000248871	TNFSF12-TNFSF13	TNFSF12-TNFSF13 readthrough	3	5.31	0.1	6.1	0.038	0	0.389329
ENSG00000167588	GPD1	glycerol-3-phosphate dehydrogenase 1 (soluble)	-2.2	5.31	-6	0.8	0.038	0	0.389134
ENSG00000157036	EXOG	endo/exonuclease (5'-3'), endonuclease G-like	2	5.3	0	5.7	0.0382	0	0.390986
ENSG00000184566	AC132216.1	N/A	-1.6	5.3	-4.3	-0.1	0.0382	0	0.39079
[truncated: 18,454 more rows]

## Sheet: Genome-wide replicate 1
#GeneID	Symbol	GeneInfo	casTLE Effect	casTLE Score	Minimum Effect Estimate	Maximum Effect Estimate	casTLE p-value
ENSG00000012124	CD22	CD22 molecule	7.5	267	6.3	11.2	5e-07
ENSG00000139508	SLC46A3	solute carrier family 46, member 3	7	238	5.9	10.9	5e-07
ENSG00000161091	MFSD12	major facilitator superfamily domain containing 12	6.2	146	5	9.5	5e-07
ENSG00000167716	WDR81	WD repeat domain 81	7.8	145	5.5	11.4	5e-07
ENSG00000105875	WDR91	WD repeat domain 91	5.8	73.7	4	9.2	5e-07
ENSG00000184207	PGP	phosphoglycolate phosphatase	4.6	60.2	3.3	7.8	5e-07
ENSG00000144224	UBXN4	UBX domain protein 4	4.4	58.6	3.2	7.2	5e-07
ENSG00000108039	XPNPEP1	X-prolyl aminopeptidase (aminopeptidase P) 1, soluble	4.1	55.7	3	7	5e-07
ENSG00000133895	MEN1	multiple endocrine neoplasia I	4.3	54.8	3.1	6.8	5e-07
ENSG00000064601	CTSA	cathepsin A	4.2	54.4	2.6	8.1	5e-07
ENSG00000186416	NKRF	NFKB repressing factor	3.7	44.6	2.7	6.3	2e-06
ENSG00000163349	HIPK1	homeodomain interacting protein kinase 1	4.7	42.6	3.2	7.9	2.5e-06
ENSG00000169813	HNRNPF	heterogeneous nuclear ribonucleoprotein F	4.4	42.1	2.8	7	2.5e-06
ENSG00000075785	RAB7A	RAB7A, member RAS oncogene family	4.3	38.5	2.9	7.3	4e-06
ENSG00000115758	ODC1	ornithine decarboxylase 1	3.9	36.2	2.4	6.4	5.5e-06
ENSG00000040531	CTNS	cystinosin, lysosomal cystine transporter	3.6	35.8	2.5	6.1	6e-06
ENSG00000168421	RHOH	ras homolog family member H	3.7	35.4	2.4	6.3	7e-06
ENSG00000077044	DGKD	diacylglycerol kinase, delta 130kDa	-3.4	34.5	-5.9	-2.1	9e-06
ENSG00000163875	MEAF6	MYST/Esa1-associated factor 6	4.3	34.2	2.7	7.7	1.05e-05
ENSG00000104885	DOT1L	DOT1-like histone H3K79 methyltransferase	3.9	32.5	2.3	8	1.15e-05
ENSG00000118058	KMT2A	lysine (K)-specific methyltransferase 2A	3.4	28.8	2.2	6	3.7e-05
ENSG00000170684	ZNF296	zinc finger protein 296	5.6	27.9	2.3	11.4	5e-05
ENSG00000108107	RPL28	ribosomal protein L28	3.9	27.9	2.5	6.6	5e-05
ENSG00000163131	CTSS	cathepsin S	3.7	27.8	2.2	6.6	5.3e-05
ENSG00000197084	LCE1C	late cornified envelope 1C	6.6	26.8	3.3	13.1	7.5e-05
ENSG00000141452	C18ORF8	chromosome 18 open reading frame 8	3.4	26.3	2.1	6.3	8.85e-05
ENSG00000198445	CCT8L2	chaperonin containing TCP1, subunit 8 (theta)-like 2	6.6	26.1	3	12.9	9.5e-05
ENSG00000131944	C19ORF40	chromosome 19 open reading frame 40	3.9	25.7	2.1	7.1	0.000115
ENSG00000010671	BTK	Bruton agammaglobulinemia tyrosine kinase	2.9	25.5	1.8	5.4	0.000126
ENSG00000120526	NUDCD1	NudC domain containing 1	2.9	25.4	1.8	4.9	0.000131
ENSG00000104946	TBC1D17	TBC1 domain family, member 17	6.4	25	3.5	12.6	0.000155
ENSG00000069122	GPR116	G protein-coupled receptor 116	6	24.9	2.2	11.9	0.000161
ENSG00000172348	RCAN2	regulator of calcineurin 2	6	24.8	2.9	12.4	0.00017
ENSG00000167182	SP2	Sp2 transcription factor	3.6	24.4	2	6.8	0.000198
ENSG00000153015	CWC27	CWC27 spliceosome-associated protein homolog (S. cerevisiae)	4	24.1	2.1	7.4	0.000228
ENSG00000067225	PKM	pyruvate kinase, muscle	6.6	23.4	3.5	13.7	0.00032
ENSG00000120690	ELF1	E74-like factor 1 (ets domain transcription factor)	4	23.2	2.2	8	0.000359
ENSG00000197713	RPE	ribulose-5-phosphate-3-epimerase	2.7	22.9	1.6	5.1	0.000414
ENSG00000174840	PDE12	phosphodiesterase 12	6.3	22.5	2.3	12.5	0.000501
ENSG00000141030	COPS3	COP9 signalosome subunit 3	-4.3	22.4	-9.6	-1.9	0.000526
ENSG00000169045	HNRNPH1	heterogeneous nuclear ribonucleoprotein H1 (H)	6.6	22.3	4	13	0.000552
ENSG00000185697	MYBL1	v-myb avian myeloblastosis viral oncogene homolog-like 1	-3.2	22.2	-6.3	-1.8	0.000575
ENSG00000174595	KLF14	Kruppel-like factor 14	6.8	22	4	14	0.000636
ENSG00000134954	ETS1	v-ets avian erythroblastosis virus E26 oncogene homolog 1	3.5	22	2	6.3	0.000636
ENSG00000130313	PGLS	6-phosphogluconolactonase	3	21.8	1.7	5.4	0.000713
ENSG00000116459	ATP5F1	ATP synthase, H+ transporting, mitochondrial Fo complex, subunit B1	6.7	21.8	4.2	13	0.000713
ENSG00000254469	RP11-849H4.2	N/A	7.1	21.6	4.3	14	0.000795
ENSG00000164985	PSIP1	PC4 and SFRS1 interacting protein 1	3.1	21.4	1.6	5.6	0.000895
ENSG00000182866	LCK	LCK proto-oncogene, Src family tyrosine kinase	3.9	21.3	2.2	7.2	0.000949
ENSG00000176695	OR4F17	olfactory receptor, family 4, subfamily F, member 17	5.8	21.3	2.6	12.1	0.000949
ENSG00000081154	PCNP	PEST proteolytic signal containing nuclear protein	3.4	21.2	1.9	6.1	0.00101
ENSG00000124302	CHST8	carbohydrate (N-acetylgalactosamine 4-0) sulfotransferase 8	3.2	21.2	1.8	6	0.00101
ENSG00000168710	AHCYL1	adenosylhomocysteinase-like 1	2.8	21.1	1.6	5.2	0.00107
ENSG00000204120	GIGYF2	GRB10 interacting GYF protein 2	-2.7	21	-5.2	-1.4	0.00114
ENSG00000125968	ID1	inhibitor of DNA binding 1, dominant negative helix-loop-helix protein	6.4	21	3.4	13	0.00114
ENSG00000085265	FCN1	ficolin (collagen/fibrinogen domain containing) 1	6.6	20.8	4	13	0.00129
ENSG00000114902	SPCS1	signal peptidase complex subunit 1 homolog (S. cerevisiae)	4	20.7	2.4	6.9	0.00138
ENSG00000232119	MCTS1	malignant T cell amplified sequence 1	-4	20.7	-9.2	-1.6	0.00138
ENSG00000196305	IARS	isoleucyl-tRNA synthetase	7	20.6	4.6	14	0.00147
ENSG00000132780	NASP	nuclear autoantigenic sperm protein (histone-binding)	6.8	20.6	4.2	14	0.00147
ENSG00000089737	DDX24	DEAD (Asp-Glu-Ala-Asp) box helicase 24	7.2	20.6	4.8	14	0.00147
ENSG00000189339	SLC35E2B	solute carrier family 35, member E2B	5.7	20.4	2	10.9	0.00167
ENSG00000123179	EBPL	emopamil binding protein-like	7.6	20.4	5.2	15	0.00167
ENSG00000170370	EMX2	empty spiracles homeobox 2	7.2	20.2	4.9	14	0.00186
ENSG00000138018	EPT1	ethanolaminephosphotransferase 1 (CDP-ethanolamine-specific)	6.8	20.1	4.4	14	0.00198
ENSG00000155903	RASA2	RAS p21 protein activator 2	-3.4	20	-6.6	-1.7	0.00211
ENSG00000182916	TCEAL7	transcription elongation factor A (SII)-like 7	6.3	20	3.5	13	0.00211
ENSG00000118513	MYB	v-myb avian myeloblastosis viral oncogene homolog	-3	19.9	-5.8	-1.4	0.00221
ENSG00000081985	IL12RB2	interleukin 12 receptor, beta 2	4.1	19.4	2.5	8.4	0.00242
ENSG00000151923	TIAL1	TIA1 cytotoxic granule-associated RNA binding protein-like 1	-3.1	18.9	-6.3	-1.7	0.00249
ENSG00000066279	ASPM	asp (abnormal spindle) homolog, microcephaly associated (Drosophila)	-2.7	18.9	-5.6	-1.3	0.00249
ENSG00000135930	EIF4E2	eukaryotic translation initiation factor 4E family member 2	-2.9	18.4	-5.9	-1.4	0.00255
ENSG00000163931	TKT	transketolase	2.6	18.2	1.4	5.4	0.00258
ENSG00000138395	CDK15	cyclin-dependent kinase 15	-2.7	17.9	-5.7	-1.2	0.00261
ENSG00000067955	CBFB	core-binding factor, beta subunit	2.9	17.6	1.4	5.7	0.00264
ENSG00000169188	APEX2	APEX nuclease (apurinic/apyrimidinic endonuclease) 2	2.8	17.2	1.5	4.9	0.00269
ENSG00000164880	INTS1	integrator complex subunit 1	6.3	17.1	3.7	13	0.00271
ENSG00000126266	FFAR1	free fatty acid receptor 1	3.9	16.8	1.8	7.8	0.00276
ENSG00000268953	AC020952.1	N/A	2.7	16.6	1.3	5.2	0.00279
ENSG00000125430	HS3ST3B1	heparan sulfate (glucosamine) 3-O-sulfotransferase 3B1	4.9	16.5	2.2	10.9	0.00281
ENSG00000116649	SRM	spermidine synthase	3.4	16.3	1.4	8.3	0.00284
ENSG00000089356	FXYD3	FXYD domain containing ion transport regulator 3	3.3	16.1	1.4	6.5	0.00288
ENSG00000144524	COPS7B	COP9 signalosome subunit 7B	-3	16.1	-6	-1.5	0.00288
ENSG00000099290	FAM21A	family with sequence similarity 21, member A	3	16	1.5	5.6	0.00289
ENSG00000100522	GNPNAT1	glucosamine-phosphate N-acetyltransferase 1	3.1	15.9	1.5	6.1	0.00291
ENSG00000205076	LGALS7	lectin, galactoside-binding, soluble, 7	3.7	15.8	1.8	7.2	0.00293
ENSG00000109332	UBE2D3	ubiquitin-conjugating enzyme E2D 3	-2.7	15.7	-5.8	-1.4	0.00295
ENSG00000184787	UBE2G2	ubiquitin-conjugating enzyme E2G 2	6.2	15.7	3.7	12	0.00295
ENSG00000159399	HK2	hexokinase 2	2.2	15.6	1.2	4.7	0.00296
ENSG00000120616	EPC1	enhancer of polycomb homolog 1 (Drosophila)	-2.5	15.6	-5.3	-1.2	0.00296
ENSG00000126603	GLIS2	GLIS family zinc finger 2	5.7	15.4	2.7	11.5	0.003
ENSG00000198034	RPS4X	ribosomal protein S4, X-linked	5.1	15.3	3.5	10.8	0.00301
ENSG00000244038	DDOST	dolichyl-diphosphooligosaccharide--protein glycosyltransferase subunit (non-catalytic)	5.3	15.2	3.3	11.5	0.00303
ENSG00000197943	PLCG2	phospholipase C, gamma 2 (phosphatidylinositol-specific)	2.5	15.2	1.2	5	0.00303
ENSG00000198563	DDX39B	DEAD (Asp-Glu-Ala-Asp) box polypeptide 39B	3.3	15.1	1.6	7	0.00305
ENSG00000164708	PGAM2	phosphoglycerate mutase 2 (muscle)	4.6	15.1	1.8	9.4	0.00305
ENSG00000187522	HSPA14	heat shock 70kDa protein 14	2.6	15.1	1.3	5.3	0.00305
ENSG00000197587	DMBX1	diencephalon/mesencephalon homeobox 1	6.1	14.9	3.1	12	0.00309
ENSG00000168255	POLR2J3	polymerase (RNA) II (DNA directed) polypeptide J3	6.2	14.9	3.4	12	0.00309
ENSG00000266953	RP11-618P17.4	N/A	4	14.9	1.9	8.9	0.00309
ENSG00000066336	SPI1	Spi-1 proto-oncogene	2.8	14.9	1.3	5.7	0.00309
ENSG00000269897	COMMD3-BMI1	COMMD3-BMI1 readthrough	3.6	14.8	1.6	7.7	0.00311
ENSG00000179151	EDC3	enhancer of mRNA decapping 3	-2.6	14.6	-5.5	-1.3	0.00315
ENSG00000186185	KIF18B	kinesin family member 18B	2.4	14.5	1.3	4.4	0.00317
ENSG00000121775	TMEM39B	transmembrane protein 39B	3.4	14.4	1.7	6.7	0.0032
ENSG00000131495	NDUFA2	NADH dehydrogenase (ubiquinone) 1 alpha subcomplex, 2, 8kDa	4.5	14.3	2.4	10	0.00322
ENSG00000138246	DNAJC13	DnaJ (Hsp40) homolog, subfamily C, member 13	-2.6	14.3	-5.6	-1.2	0.00322
ENSG00000095585	BLNK	B-cell linker	2.4	14.2	1.1	4.7	0.00325
ENSG00000206181	TCEB3B	transcription elongation factor B polypeptide 3B (elongin A2)	6.2	14.1	3.4	12	0.00327
ENSG00000007312	CD79B	CD79b molecule, immunoglobulin-associated beta	2.9	14	1.3	5.5	0.0033
ENSG00000173638	SLC19A1	solute carrier family 19 (folate transporter), member 1	2.4	14	1.1	4.9	0.0033
ENSG00000159882	ZNF230	zinc finger protein 230	3.7	13.9	1.6	6.7	0.00332
ENSG00000124357	NAGK	N-acetylglucosamine kinase	2.9	13.9	1.5	6.4	0.00332
ENSG00000105220	GPI	glucose-6-phosphate isomerase	2.4	13.9	1.2	4.9	0.00332
ENSG00000123136	DDX39A	DEAD (Asp-Glu-Ala-Asp) box polypeptide 39A	2.6	13.8	1.2	4.9	0.00334
ENSG00000143033	MTF2	metal response element binding transcription factor 2	-2.5	13.8	-5.5	-1.1	0.00334
ENSG00000136986	DERL1	derlin 1	-2.5	13.8	-5.9	-1.2	0.00334
ENSG00000269179	CTC-326K19.6	N/A	3.1	13.6	1.2	6.5	0.00338
ENSG00000138107	ACTR1A	ARP1 actin-related protein 1 homolog A, centractin alpha (yeast)	-2.6	13.5	-6.2	-1.1	0.00341
ENSG00000198829	SUCNR1	succinate receptor 1	4	13.5	1.7	7.7	0.00341
ENSG00000266964	FXYD1	FXYD domain containing ion transport regulator 1	2.3	13.4	1.1	5.9	0.00343
ENSG00000102393	GLA	galactosidase, alpha	4.8	13.3	1.5	10.7	0.00346
ENSG00000165118	C9ORF64	chromosome 9 open reading frame 64	5.9	13.3	2.4	12	0.00346
ENSG00000138629	UBL7	ubiquitin-like 7	-2.9	13	-6	-1.2	0.00353
ENSG00000124702	KLHDC3	kelch domain containing 3	-2.7	12.9	-6.8	-1.1	0.00356
ENSG00000241127	YAE1D1	Yae1 domain containing 1	5.5	12.9	2.9	11.5	0.00356
ENSG00000116001	TIA1	TIA1 cytotoxic granule-associated RNA binding protein	-3	12.9	-7.4	-1.2	0.00356
ENSG00000167384	ZNF180	zinc finger protein 180	3.1	12.8	1.3	5.9	0.0036
ENSG00000115289	PCGF1	polycomb group ring finger 1	-2.4	12.7	-5.4	-1	0.00364
ENSG00000142252	GEMIN7	gem (nuclear organelle) associated protein 7	3.2	12.7	1.5	6.1	0.00364
ENSG00000120705	ETF1	eukaryotic translation termination factor 1	5.9	12.6	3.1	12	0.00367
ENSG00000009954	BAZ1B	bromodomain adjacent to zinc finger domain, 1B	2.9	12.6	1.2	7.9	0.00367
ENSG00000105401	CDC37	cell division cycle 37	3.2	12.5	1.5	7.5	0.00371
ENSG00000102401	ARMCX3	armadillo repeat containing, X-linked 3	6.1	12.5	3.1	12	0.00371
ENSG00000205209	SCGB2B2	secretoglobin, family 2B, member 2	2.5	12.5	1.2	5.7	0.00371
ENSG00000117394	SLC2A1	solute carrier family 2 (facilitated glucose transporter), member 1	2.4	12.5	1	5.1	0.00371
ENSG00000179066	AC020907.1	N/A	2.2	12.5	1	4.2	0.00371
ENSG00000100888	CHD8	chromodomain helicase DNA binding protein 8	2.3	12.4	1	5.1	0.00374
ENSG00000198597	ZNF536	zinc finger protein 536	2.6	12.4	1	5.7	0.00374
ENSG00000139746	RBM26	RNA binding motif protein 26	-2.5	12.4	-5.6	-1	0.00374
ENSG00000225830	ERCC6	excision repair cross-complementation group 6	-3.1	12.4	-7.5	-1.6	0.00374
ENSG00000065526	SPEN	spen family transcriptional repressor	-2.9	12.2	-6.4	-1.1	0.00382
ENSG00000089902	RCOR1	REST corepressor 1	2.9	12.2	1.2	6.4	0.00382
ENSG00000101138	CSTF1	cleavage stimulation factor, 3' pre-RNA, subunit 1, 50kDa	5.6	12.2	3	11.8	0.00382
ENSG00000114742	WDR48	WD repeat domain 48	2.7	12.2	1.1	5.9	0.00382
ENSG00000117000	RLF	rearranged L-myc fusion	-2.7	12	-6.3	-1	0.00393
ENSG00000143742	SRP9	signal recognition particle 9kDa	3.7	12	1.7	8.5	0.00393
ENSG00000139990	DCAF5	DDB1 and CUL4 associated factor 5	-2.2	12	-5.2	-0.8	0.00393
ENSG00000187135	VSTM2B	V-set and transmembrane domain containing 2B	2.5	12	1.1	5.7	0.00393
ENSG00000105698	USF2	upstream transcription factor 2, c-fos interacting	2.7	11.9	1	5.8	0.00397
ENSG00000134057	CCNB1	cyclin B1	2.4	11.9	0.9	5.4	0.00397
ENSG00000112118	MCM3	minichromosome maintenance complex component 3	4.6	11.9	2.1	9.5	0.00397
ENSG00000127824	TUBA4A	tubulin, alpha 4a	-2.7	11.8	-6.1	-1.2	0.00402
ENSG00000155506	LARP1	La ribonucleoprotein domain family, member 1	-2.6	11.8	-5.7	-1	0.00402
ENSG00000129810	SGOL1	shugoshin-like 1 (S. pombe)	-2.8	11.8	-5.9	-1.1	0.00402
ENSG00000011485	PPP5C	protein phosphatase 5, catalytic subunit	2.8	11.8	0.9	5.4	0.00402
ENSG00000166359	WDR88	WD repeat domain 88	2.5	11.8	1.1	5.1	0.00402
ENSG00000254415	SIGLEC14	sialic acid binding Ig-like lectin 14	2.7	11.7	1.1	6	0.00407
ENSG00000135451	TROAP	trophinin associated protein	-2.2	11.7	-4.9	-0.9	0.00407
ENSG00000104976	SNAPC2	small nuclear RNA activating complex, polypeptide 2, 45kDa	6	11.6	3.1	12	0.00413
ENSG00000151893	CACUL1	CDK2-associated, cullin domain 1	-2.4	11.6	-5.3	-0.9	0.00413
ENSG00000032219	ARID4A	AT rich interactive domain 4A (RBP1-like)	-2.6	11.5	-6.1	-0.9	0.0042
ENSG00000005073	HOXA11	homeobox A11	-3.3	11.5	-7.3	-1.4	0.0042
ENSG00000167770	OTUB1	OTU deubiquitinase, ubiquitin aldehyde binding 1	-2.1	11.4	-4.8	-0.9	0.00425
ENSG00000028310	BRD9	bromodomain containing 9	-2.8	11.3	-6.1	-1.1	0.00433
ENSG00000132522	GPS2	G protein pathway suppressor 2	4.1	11.3	1.6	9.6	0.00433
ENSG00000161980	POLR3K	polymerase (RNA) III (DNA directed) polypeptide K, 12.3 kDa	3.7	11.3	1.7	7.4	0.00433
ENSG00000116237	ICMT	isoprenylcysteine carboxyl methyltransferase	2.1	11.2	0.9	4.6	0.00439
ENSG00000176788	BASP1	brain abundant, membrane attached signal protein 1	3.8	11.1	1.7	8	0.00446
ENSG00000109861	CTSC	cathepsin C	2	11	0.7	4.7	0.00455
ENSG00000104901	DKKL1	dickkopf-like 1	3	11	1.2	6.6	0.00455
ENSG00000131943	C19ORF12	chromosome 19 open reading frame 12	2.5	10.9	0.9	5.8	0.00462
ENSG00000176087	SLC35A4	solute carrier family 35, member A4	-2.9	10.9	-7.1	-1	0.00462
ENSG00000145349	CAMK2D	calcium/calmodulin-dependent protein kinase II delta	-2.4	10.9	-5.5	-0.8	0.00462
ENSG00000177045	SIX5	SIX homeobox 5	5.7	10.8	2.3	12	0.0047
ENSG00000150316	CWC15	CWC15 spliceosome-associated protein	2.9	10.7	1.1	6.4	0.00479
ENSG00000105171	POP4	processing of precursor 4, ribonuclease P/MRP subunit (S. cerevisiae)	3.3	10.7	1.4	8	0.00479
ENSG00000134324	LPIN1	lipin 1	2.8	10.7	1.1	5.8	0.00479
ENSG00000163273	NPPC	natriuretic peptide C	2.5	10.7	1	5.1	0.00479
ENSG00000148229	POLE3	polymerase (DNA directed), epsilon 3, accessory subunit	3.8	10.7	1.5	8.8	0.00479
ENSG00000197451	HNRNPAB	heterogeneous nuclear ribonucleoprotein A/B	-2.4	10.6	-5.7	-0.8	0.00489
ENSG00000163536	SERPINI1	serpin peptidase inhibitor, clade I (neuroserpin), member 1	3.5	10.6	1.3	7.7	0.00489
ENSG00000149187	CELF1	CUGBP, Elav-like family member 1	1.8	10.6	0.7	4.3	0.00489
ENSG00000121297	TSHZ3	teashirt zinc finger homeobox 3	3	10.5	1	6.4	0.00498
ENSG00000146006	LRRTM2	leucine rich repeat transmembrane neuronal 2	6	10.5	3.1	12	0.00498
ENSG00000100364	KIAA0930	KIAA0930	-3.6	10.4	-8.5	-1.2	0.00508
ENSG00000161847	RAVER1	ribonucleoprotein, PTB-binding 1	-2.3	10.4	-5.4	-0.7	0.00508
ENSG00000123144	C19ORF43	chromosome 19 open reading frame 43	2.4	10.3	1.1	5.2	0.00518
ENSG00000169122	FAM110B	family with sequence similarity 110, member B	2.9	10.3	1.2	6.7	0.00518
ENSG00000111652	COPS7A	COP9 signalosome subunit 7A	-2.5	10.3	-6.4	-0.8	0.00518
ENSG00000173559	NABP1	nucleic acid binding protein 1	5.9	10.2	2.6	12	0.00529
ENSG00000107798	LIPA	lipase A, lysosomal acid, cholesterol esterase	2.5	10.2	1	5	0.00529
ENSG00000179292	TMEM151A	transmembrane protein 151A	-2.8	10.2	-5.6	-1.3	0.00529
ENSG00000203902	PNMA6B	paraneoplastic Ma antigen family member 6B (pseudogene)	3.9	10.2	1.5	9	0.00529
ENSG00000229676	ZNF492	zinc finger protein 492	-2.3	10.2	-5.5	-0.8	0.00529
ENSG00000113068	PFDN1	prefoldin subunit 1	-2.6	10.1	-6	-0.9	0.00541
ENSG00000136051	KIAA1033	KIAA1033	3.5	10.1	1.7	8.3	0.00541
ENSG00000159921	GNE	glucosamine (UDP-N-acetyl)-2-epimerase/N-acetylmannosamine kinase	-1.8	10.1	-4.1	-0.7	0.00541
ENSG00000021488	SLC7A9	solute carrier family 7 (amino acid transporter light chain, bo,+ system), member 9	2.3	10.1	0.8	5.4	0.00541
ENSG00000118197	DDX59	DEAD (Asp-Glu-Ala-Asp) box polypeptide 59	3.9	10.1	1.5	8.1	0.00541
ENSG00000172977	KAT5	K(lysine) acetyltransferase 5	3.2	10.1	1.5	7.3	0.00541
ENSG00000139910	NOVA1	neuro-oncological ventral antigen 1	3	10	1	6.5	0.00555
ENSG00000126767	ELK1	ELK1, member of ETS oncogene family	3	10	1.4	7.1	0.00555
ENSG00000165471	MBL2	mannose-binding lectin (protein C) 2, soluble	4	9.97	1.4	8	0.00559
ENSG00000173674	EIF1AX	eukaryotic translation initiation factor 1A, X-linked	5.2	9.94	2.5	10.8	0.00563
ENSG00000235194	PPP1R3E	protein phosphatase 1, regulatory subunit 3E	2.7	9.94	1.1	5.5	0.00563
ENSG00000174915	PTDSS2	phosphatidylserine synthase 2	5.6	9.91	1.9	11.7	0.00567
ENSG00000107371	EXOSC3	exosome component 3	4.4	9.86	2.3	8.8	0.00573
ENSG00000100105	PATZ1	POZ (BTB) and AT hook containing zinc finger 1	3.2	9.86	1.2	7	0.00573
ENSG00000104870	FCGRT	Fc fragment of IgG, receptor, transporter, alpha	2.7	9.85	0.9	6.3	0.00575
ENSG00000198015	MRPL42	mitochondrial ribosomal protein L42	3.7	9.84	1.5	7.4	0.00576
ENSG00000221983	UBA52	ubiquitin A-52 residue ribosomal protein fusion product 1	3.8	9.84	1.7	8.4	0.00576
ENSG00000099949	LZTR1	leucine-zipper-like transcription regulator 1	-2.6	9.83	-6.3	-0.8	0.00578
ENSG00000178904	DPY19L3	dpy-19-like 3 (C. elegans)	2.3	9.83	0.9	5.5	0.00578
ENSG00000105675	ATP4A	ATPase, H+/K+ exchanging, alpha polypeptide	2.6	9.82	0.9	5.1	0.00579
ENSG00000160957	RECQL4	RecQ protein-like 4	2.3	9.8	0.8	5.4	0.00582
ENSG00000185897	FFAR3	free fatty acid receptor 3	3.6	9.77	1.3	8.6	0.00585
ENSG00000179915	NRXN1	neurexin 1	4	9.75	1.6	8.2	0.00588
ENSG00000245848	CEBPA	CCAAT/enhancer binding protein (C/EBP), alpha	2.7	9.75	1	5.9	0.00588
ENSG00000204653	ASPDH	aspartate dehydrogenase domain containing	3.2	9.73	1.3	7.7	0.00591
ENSG00000211956	IGHV4-34	immunoglobulin heavy variable 4-34	2.5	9.72	0.8	5.6	0.00592
ENSG00000101057	MYBL2	v-myb avian myeloblastosis viral oncogene homolog-like 2	2.7	9.71	0.9	6.4	0.00594
ENSG00000198944	SOWAHA	sosondowah ankyrin repeat domain family member A	2.7	9.69	1.2	5.5	0.00597
ENSG00000101997	CCDC22	coiled-coil domain containing 22	2	9.69	0.7	4.8	0.00597
ENSG00000077312	SNRPA	small nuclear ribonucleoprotein polypeptide A	4.2	9.67	1.2	9.6	0.00599
ENSG00000255394	C8ORF49	chromosome 8 open reading frame 49	3.7	9.64	1.7	7.6	0.00604
ENSG00000173473	SMARCC1	SWI/SNF related, matrix associated, actin dependent regulator of chromatin, subfamily c, member 1	2	9.63	0.7	4.7	0.00606
ENSG00000131941	RHPN2	rhophilin, Rho GTPase binding protein 2	2.2	9.61	0.8	5.4	0.00609
ENSG00000149480	MTA2	metastasis associated 1 family, member 2	2.1	9.61	0.7	4.6	0.00609
ENSG00000117751	PPP1R8	protein phosphatase 1, regulatory subunit 8	3	9.58	1.3	8.8	0.00613
ENSG00000172236	TPSAB1	tryptase alpha/beta 1	-2.7	9.56	-6.5	-1.1	0.00615
ENSG00000153147	SMARCA5	SWI/SNF related, matrix associated, actin dependent regulator of chromatin, subfamily a, member 5	3.2	9.55	1.4	6.6	0.00616
ENSG00000112237	CCNC	cyclin C	1.9	9.54	0.7	5	0.00618
ENSG00000175063	UBE2C	ubiquitin-conjugating enzyme E2C	-2.5	9.51	-5.8	-0.8	0.00621
ENSG00000059804	SLC2A3	solute carrier family 2 (facilitated glucose transporter), member 3	3.4	9.51	1.4	8.1	0.00621
ENSG00000056097	ZFR	zinc finger RNA binding protein	2	9.43	0.7	4.8	0.00632
ENSG00000143387	CTSK	cathepsin K	4.3	9.41	1.9	10.3	0.00635
ENSG00000198535	C2CD4A	C2 calcium-dependent domain containing 4A	2.9	9.41	1.1	7.5	0.00635
ENSG00000158941	CCAR2	cell cycle and apoptosis regulator 2	-1.8	9.37	-4.2	-0.7	0.00641
ENSG00000165030	NFIL3	nuclear factor, interleukin 3 regulated	3.8	9.35	1.4	8	0.00644
ENSG00000124215	CDH26	cadherin 26	5.4	9.35	2.1	11.6	0.00644
ENSG00000041802	LSG1	large 60S subunit nuclear export GTPase 1	5.2	9.34	2	10.6	0.00646
ENSG00000071054	MAP4K4	mitogen-activated protein kinase kinase kinase kinase 4	-2.5	9.32	-6.6	-0.8	0.00649
ENSG00000105507	CABP5	calcium binding protein 5	3	9.29	1.2	6.3	0.00654
ENSG00000121381	TAS2R9	taste receptor, type 2, member 9	-2.3	9.29	-5.4	-0.8	0.00654
ENSG00000096746	HNRNPH3	heterogeneous nuclear ribonucleoprotein H3 (2H9)	3.3	9.27	1.1	7.8	0.00657
ENSG00000167230	C17ORF78	chromosome 17 open reading frame 78	3.5	9.24	1.4	7.2	0.00661
ENSG00000269175	AC093157.1	N/A	4.4	9.21	2.5	9	0.00665
ENSG00000165716	FAM69B	family with sequence similarity 69, member B	4.3	9.17	1.9	9.5	0.00672
ENSG00000198826	ARHGAP11A	Rho GTPase activating protein 11A	2.7	9.16	-1.3	7	0.00674
ENSG00000114744	COMMD2	COMM domain containing 2	4.8	9.16	1.7	10.2	0.00674
ENSG00000087586	AURKA	aurora kinase A	3.5	9.15	1.1	7	0.00676
ENSG00000123338	NCKAP1L	NCK-associated protein 1-like	-2.3	9.12	-5.1	-0.8	0.00681
ENSG00000132773	TOE1	target of EGR1, member 1 (nuclear)	-2.3	9.11	-5.2	-0.8	0.00684
ENSG00000122674	CCZ1	CCZ1 vacuolar protein trafficking and biogenesis associated homolog (S. cerevisiae)	2.9	9.09	1.2	6.6	0.00687
ENSG00000150961	SEC24D	SEC24 family member D	2.5	9.04	0.9	5.2	0.00695
ENSG00000185945	NXF2B	nuclear RNA export factor 2B	3.7	9.02	2.2	8	0.00699
ENSG00000196862	RGPD4	RANBP2-like and GRIP domain containing 4	3.8	9.01	1	8.7	0.00701
ENSG00000162643	WDR63	WD repeat domain 63	4.1	9	1.5	9.2	0.00702
ENSG00000103995	CEP152	centrosomal protein 152kDa	-2.4	8.99	-5.9	-0.7	0.00704
ENSG00000076928	ARHGEF1	Rho guanine nucleotide exchange factor (GEF) 1	2.4	8.95	0.8	5.5	0.00713
ENSG00000261915	RP11-542C16.2	N/A	4.5	8.9	1.5	10.3	0.00722
ENSG00000111670	GNPTAB	N-acetylglucosamine-1-phosphate transferase, alpha and beta subunits	2	8.87	0.7	4.8	0.00727
ENSG00000166401	SERPINB8	serpin peptidase inhibitor, clade B (ovalbumin), member 8	5.9	8.86	2.7	12	0.00729
ENSG00000148795	CYP17A1	cytochrome P450, family 17, subfamily A, polypeptide 1	2.4	8.86	0.7	8	0.00729
ENSG00000267757	C19ORF83	chromosome 19 open reading frame 83	3	8.84	1.1	7.2	0.00733
ENSG00000139998	RAB15	RAB15, member RAS oncogene family	3.6	8.84	1.2	8.2	0.00733
ENSG00000101230	ISM1	isthmin 1, angiogenesis inhibitor	5.9	8.83	2.8	12	0.00735
ENSG00000267631	CGB1	chorionic gonadotropin, beta polypeptide 1	5.4	8.82	2.6	11	0.00737
ENSG00000108861	DUSP3	dual specificity phosphatase 3	2.8	8.8	0.9	6.7	0.00741
ENSG00000113658	SMAD5	SMAD family member 5	3.4	8.78	1.4	8.2	0.00745
ENSG00000108395	TRIM37	tripartite motif containing 37	-2.5	8.76	-6.1	-0.7	0.00749
ENSG00000177558	FAM187B	family with sequence similarity 187, member B	2	8.74	0.7	4.2	0.00753
ENSG00000126787	DLGAP5	discs, large (Drosophila) homolog-associated protein 5	-2.2	8.73	-5.4	-0.8	0.00755
ENSG00000004534	RBM6	RNA binding motif protein 6	2.9	8.73	0.9	7.2	0.00755
ENSG00000198551	ZNF627	zinc finger protein 627	5.4	8.73	1.6	11.4	0.00755
ENSG00000055130	CUL1	cullin 1	1.8	8.69	0.6	4.1	0.00764
ENSG00000123374	CDK2	cyclin-dependent kinase 2	2.5	8.68	0.8	5.8	0.00767
ENSG00000270299	RP5-850E9.3	N/A	-2.3	8.66	-5.7	-1	0.00772
ENSG00000187258	NPSR1	neuropeptide S receptor 1	-1.9	8.66	-4.9	-0.6	0.00772
ENSG00000178934	LGALS7B	lectin, galactoside-binding, soluble, 7B	2.4	8.64	0.8	5.1	0.00776
ENSG00000244291	C7ORF13	chromosome 7 open reading frame 13	-2.8	8.64	-6.5	-1	0.00776
ENSG00000070785	EIF2B3	eukaryotic translation initiation factor 2B, subunit 3 gamma, 58kDa	5.9	8.6	2.1	12	0.00786
ENSG00000241343	RPL36A	ribosomal protein L36a	2.4	8.6	0.7	5.6	0.00786
ENSG00000071127	WDR1	WD repeat domain 1	2.5	8.57	0.9	6	0.00793
ENSG00000182771	GRID1	glutamate receptor, ionotropic, delta 1	2.5	8.56	0.8	5.1	0.00795
ENSG00000095574	IKZF5	IKAROS family zinc finger 5 (Pegasus)	-2	8.56	-4.9	-0.6	0.00795
ENSG00000148840	PPRC1	peroxisome proliferator-activated receptor gamma, coactivator-related 1	5.9	8.55	3	12	0.00797
ENSG00000153207	AHCTF1	AT hook containing transcription factor 1	-2.4	8.52	-5.6	-1	0.00804
ENSG00000172315	TP53RK	TP53 regulating kinase	5.4	8.52	2.5	11	0.00804
ENSG00000105538	RASIP1	Ras interacting protein 1	2.5	8.51	0.9	6.1	0.00806
ENSG00000248369	RP11-62N21.1	N/A	-2.7	8.46	-6.3	-0.9	0.00817
ENSG00000078304	PPP2R5C	protein phosphatase 2, regulatory subunit B', gamma	-3.3	8.45	-7.7	-1.2	0.00819
ENSG00000129315	CCNT1	cyclin T1	-1.8	8.45	-4.1	-0.6	0.00819
ENSG00000105707	HPN	hepsin	2.4	8.4	0.8	5.1	0.00832
ENSG00000086232	EIF2AK1	eukaryotic translation initiation factor 2-alpha kinase 1	3.5	8.39	1.5	7.7	0.00834
ENSG00000226174	TEX22	testis expressed 22	2.8	8.39	1	6.4	0.00834
ENSG00000104974	LILRA1	leukocyte immunoglobulin-like receptor, subfamily A (with TM domain), member 1	2.7	8.39	0.7	8.3	0.00834
ENSG00000122140	MRPS2	mitochondrial ribosomal protein S2	3.7	8.37	1.4	9.2	0.00839
ENSG00000121774	KHDRBS1	KH domain containing, RNA binding, signal transduction associated 1	1.8	8.33	0.6	4.1	0.00848
ENSG00000166352	C11ORF74	chromosome 11 open reading frame 74	4.1	8.31	1.3	10.1	0.00854
ENSG00000268614	CTD-2207O23.10	N/A	2.3	8.3	0.7	4.9	0.00856
ENSG00000166398	KIAA0355	KIAA0355	2.1	8.28	0.6	4.9	0.00862
ENSG00000160207	HSF2BP	heat shock transcription factor 2 binding protein	-3.4	8.28	-8.3	-1.1	0.00862
ENSG00000145332	KLHL8	kelch-like family member 8	-4.2	8.23	-8.9	-1.5	0.00876
ENSG00000133561	GIMAP6	GTPase, IMAP family member 6	-2.6	8.19	-7.9	-0.7	0.00887
ENSG00000101639	CEP192	centrosomal protein 192kDa	3.5	8.17	1.2	9.2	0.00892
ENSG00000064313	TAF2	TAF2 RNA polymerase II, TATA box binding protein (TBP)-associated factor, 150kDa	5.8	8.15	3.1	12	0.00899
ENSG00000272047	GTF2H5	general transcription factor IIH, polypeptide 5	-2.4	8.15	-6.2	-0.6	0.00899
ENSG00000110955	ATP5B	ATP synthase, H+ transporting, mitochondrial F1 complex, beta polypeptide	4.6	8.14	2	9.8	0.00901
ENSG00000108604	SMARCD2	SWI/SNF related, matrix associated, actin dependent regulator of chromatin, subfamily d, member 2	2.1	8.12	0.6	5.1	0.00906
ENSG00000116138	DNAJC16	DnaJ (Hsp40) homolog, subfamily C, member 16	-2.3	8.11	-5.9	-0.7	0.00909
ENSG00000145982	FARS2	phenylalanyl-tRNA synthetase 2, mitochondrial	4.5	8.1	1.7	9.6	0.00912
ENSG00000099617	EFNA2	ephrin-A2	-2.2	8.04	-5.4	-0.7	0.00928
ENSG00000139842	CUL4A	cullin 4A	-2.8	8.04	-6.9	-0.7	0.00928
ENSG00000139971	C14ORF37	chromosome 14 open reading frame 37	3.3	8.01	1	7.3	0.00936
ENSG00000141564	RPTOR	regulatory associated protein of MTOR, complex 1	2.8	8	1.3	6	0.00939
ENSG00000129173	E2F8	E2F transcription factor 8	1.9	7.97	0.5	4.7	0.00948
ENSG00000197157	SND1	staphylococcal nuclease and tudor domain containing 1	3.6	7.97	0.8	8.8	0.00948
ENSG00000079215	SLC1A3	solute carrier family 1 (glial high affinity glutamate transporter), member 3	3.7	7.96	1	9.1	0.00951
ENSG00000164815	ORC5	origin recognition complex, subunit 5	3.6	7.95	1.6	9.4	0.00955
ENSG00000169019	COMMD8	COMM domain containing 8	2.5	7.95	0.9	5.4	0.00955
ENSG00000172845	SP3	Sp3 transcription factor	-2.4	7.92	-6.9	-0.6	0.00964
ENSG00000177992	SPATA31E1	SPATA31 subfamily E, member 1	-2.5	7.91	-6.2	-0.7	0.00966
ENSG00000198056	PRIM1	primase, DNA, polypeptide 1 (49kDa)	-2	7.9	-5.2	-0.6	0.00969
ENSG00000188223	AC002398.9	N/A	2	7.89	0.6	5.1	0.00972
ENSG00000116478	HDAC1	histone deacetylase 1	1.8	7.89	0.5	4.8	0.00972
ENSG00000005339	CREBBP	CREB binding protein	2	7.87	0.6	4.8	0.00978
ENSG00000078674	PCM1	pericentriolar material 1	-2.8	7.87	-7.2	-0.8	0.00978
ENSG00000008130	NADK	NAD kinase	2.7	7.87	0.9	6.9	0.00978
ENSG00000197153	HIST1H3J	histone cluster 1, H3j	5	7.86	1.8	10.5	0.00981
ENSG00000183598	HIST2H3D	histone cluster 2, H3d	5	7.85	1.4	10.6	0.00985
ENSG00000126709	IFI6	interferon, alpha-inducible protein 6	2.6	7.84	0.7	6.1	0.00989
ENSG00000175792	RUVBL1	RuvB-like AAA ATPase 1	4	7.84	2	8	0.00989
ENSG00000125877	ITPA	inosine triphosphatase (nucleoside triphosphate pyrophosphatase)	2.8	7.84	0.8	6.1	0.00989
ENSG00000122644	ARL4A	ADP-ribosylation factor-like 4A	4.1	7.83	1.1	10.7	0.00993
ENSG00000100312	ACR	acrosin	2.8	7.82	0.8	6.7	0.00996
ENSG00000182318	ZSCAN22	zinc finger and SCAN domain containing 22	3	7.79	1	6.6	0.0101
ENSG00000256553	TRAV1-2	T cell receptor alpha variable 1-2	-2.7	7.78	-7	-0.7	0.0101
ENSG00000122566	HNRNPA2B1	heterogeneous nuclear ribonucleoprotein A2/B1	-3.4	7.78	-8.4	-1.1	0.0101
ENSG00000164933	SLC25A32	solute carrier family 25 (mitochondrial folate carrier), member 32	2	7.77	0.6	4.2	0.0101
ENSG00000183092	BEGAIN	brain-enriched guanylate kinase-associated	-1.8	7.75	-4.4	-0.7	0.0102
ENSG00000009335	UBE3C	ubiquitin protein ligase E3C	-2.2	7.75	-5.9	-0.6	0.0102
ENSG00000204427	ABHD16A	abhydrolase domain containing 16A	4.5	7.72	2.2	9	0.0103
ENSG00000172575	RASGRP1	RAS guanyl releasing protein 1 (calcium and DAG-regulated)	-2	7.7	-5.4	-0.6	0.0103
ENSG00000113716	HMGXB3	HMG box domain containing 3	-2.2	7.68	-6	-0.5	0.0104
ENSG00000164900	GBX1	gastrulation brain homeobox 1	2.6	7.67	0.7	5.9	0.0105
ENSG00000211945	IGHV1-18	immunoglobulin heavy variable 1-18	-2.6	7.67	-6.5	-0.8	0.0105
ENSG00000169679	BUB1	BUB1 mitotic checkpoint serine/threonine kinase	-1.9	7.66	-5.4	-0.4	0.0105
ENSG00000142279	WTIP	Wilms tumor 1 interacting protein	2.1	7.64	0.7	4.3	0.0106
ENSG00000011422	PLAUR	plasminogen activator, urokinase receptor	3.2	7.63	0.7	6.7	0.0106
ENSG00000130876	SLC7A10	solute carrier family 7 (neutral amino acid transporter light chain, asc system), member 10	2.4	7.63	0.7	5.2	0.0106
ENSG00000042088	TDP1	tyrosyl-DNA phosphodiesterase 1	4.3	7.6	1.4	10.3	0.0107
ENSG00000165025	SYK	spleen tyrosine kinase	2	7.59	0.6	4.5	0.0108
ENSG00000074319	TSG101	tumor susceptibility 101	-2.2	7.56	-5.3	-0.7	0.0109
ENSG00000089248	ERP29	endoplasmic reticulum protein 29	2.4	7.55	0.6	6.6	0.0109
ENSG00000186326	RGS9BP	regulator of G protein signaling 9 binding protein	2.1	7.54	0.5	5.4	0.011
ENSG00000180884	ZNF792	zinc finger protein 792	2.2	7.54	0.6	5.7	0.011
ENSG00000196437	ZNF569	zinc finger protein 569	2.4	7.54	0.7	5.1	0.011
ENSG00000215405	GOLGA6L6	golgin A6 family-like 6	5.5	7.53	2.3	11	0.011
ENSG00000175376	EIF1AD	eukaryotic translation initiation factor 1A domain containing	5.7	7.52	3	12	0.011
ENSG00000116754	SRSF11	serine/arginine-rich splicing factor 11	-2.3	7.52	-6	-0.7	0.011
ENSG00000066557	LRRC40	leucine rich repeat containing 40	-1.7	7.5	-4.7	-0.4	0.0111
ENSG00000132142	ACACA	acetyl-CoA carboxylase alpha	2.8	7.5	0.6	7.8	0.0111
ENSG00000123739	PLA2G12A	phospholipase A2, group XIIA	-2.9	7.5	-7.4	-0.8	0.0111
ENSG00000132680	KIAA0907	KIAA0907	-2.2	7.5	-5.4	-0.7	0.0111
ENSG00000197299	BLM	Bloom syndrome, RecQ helicase-like	-2.4	7.5	-6.5	-0.6	0.0111
ENSG00000162188	GNG3	guanine nucleotide binding protein (G protein), gamma 3	3.3	7.49	1.1	7.8	0.0112
ENSG00000172500	FIBP	fibroblast growth factor (acidic) intracellular binding protein	-2	7.49	-5.1	-0.5	0.0112
ENSG00000204278	TMEM235	transmembrane protein 235	4.2	7.43	1.1	10.2	0.0114
ENSG00000213079	SCAF8	SR-related CTD-associated factor 8	-2.3	7.42	-6.3	-0.5	0.0114
ENSG00000183307	CECR6	cat eye syndrome chromosome region, candidate 6	2.2	7.41	0.5	5.9	0.0115
ENSG00000130881	LRP3	low density lipoprotein receptor-related protein 3	2	7.39	0.6	5.1	0.0116
ENSG00000100632	ERH	enhancer of rudimentary homolog (Drosophila)	5.6	7.38	2.8	11	0.0116
ENSG00000173039	RELA	v-rel avian reticuloendotheliosis viral oncogene homolog A	2.6	7.36	0.7	7	0.0117
ENSG00000136895	GARNL3	GTPase activating Rap/RanGAP domain-like 3	5.2	7.35	2.2	11	0.0117
ENSG00000126249	PDCD2L	programmed cell death 2-like	2.1	7.35	0.6	5.3	0.0117
ENSG00000162419	GMEB1	glucocorticoid modulatory element binding protein 1	4.3	7.33	0.9	9.9	0.0118
ENSG00000081913	PHLPP1	PH domain and leucine rich repeat protein phosphatase 1	2.7	7.32	0.9	6.3	0.0118
ENSG00000135540	NHSL1	NHS-like 1	-2.3	7.31	-6.7	-0.5	0.0119
ENSG00000100227	POLDIP3	polymerase (DNA-directed), delta interacting protein 3	3	7.3	0.9	6.4	0.0119
ENSG00000095059	DHPS	deoxyhypusine synthase	3.4	7.29	1.3	8.6	0.012
ENSG00000103222	ABCC1	ATP-binding cassette, sub-family C (CFTR/MRP), member 1	-2.2	7.29	-5.7	-0.6	0.012
ENSG00000169762	TAPT1	transmembrane anterior posterior transformation 1	2.6	7.28	0.7	6	0.012
ENSG00000166510	CCDC68	coiled-coil domain containing 68	3.1	7.28	1	6.7	0.012
ENSG00000110169	HPX	hemopexin	3.3	7.27	1.3	7.7	0.0121
ENSG00000151502	VPS26B	vacuolar protein sorting 26 homolog B (S. pombe)	5.1	7.26	2.2	11	0.0121
ENSG00000162804	SNED1	sushi, nidogen and EGF-like domains 1	-2.4	7.26	-6.4	-0.6	0.0121
ENSG00000089154	GCN1L1	GCN1 general control of amino-acid synthesis 1-like 1 (yeast)	2.7	7.26	0.6	6.7	0.0121
ENSG00000156976	EIF4A2	eukaryotic translation initiation factor 4A2	-1.8	7.26	-4.5	-0.6	0.0121
ENSG00000188322	SBK1	SH3 domain binding kinase 1	-3.2	7.25	-8	-1	0.0122
ENSG00000169957	ZNF768	zinc finger protein 768	4	7.24	1.5	9.7	0.0122
ENSG00000124875	CXCL6	chemokine (C-X-C motif) ligand 6	3.5	7.22	0.9	9.1	0.0123
ENSG00000164134	NAA15	N(alpha)-acetyltransferase 15, NatA auxiliary subunit	2.7	7.21	0.7	6.9	0.0124
ENSG00000138115	CYP2C8	cytochrome P450, family 2, subfamily C, polypeptide 8	5.3	7.2	1.1	11	0.0124
ENSG00000167967	E4F1	E4F transcription factor 1	-2.3	7.19	-5.7	-0.7	0.0125
ENSG00000123405	NFE2	nuclear factor, erythroid 2	-2.3	7.18	-6.4	-0.5	0.0125
ENSG00000132793	LPIN3	lipin 3	5.6	7.18	1.9	11	0.0125
ENSG00000257088	PNMA6D	paraneoplastic Ma antigen family member 6D (pseudogene)	4.7	7.15	1.7	9.7	0.0126
ENSG00000221968	FADS3	fatty acid desaturase 3	3.1	7.14	1	7.4	0.0127
ENSG00000143207	RFWD2	ring finger and WD repeat domain 2, E3 ubiquitin protein ligase	-2	7.14	-6	1.6	0.0127
ENSG00000178980	SEPW1	selenoprotein W, 1	3.9	7.14	1.7	9.7	0.0127
ENSG00000174669	SLC29A2	solute carrier family 29 (equilibrative nucleoside transporter), member 2	3.5	7.14	1.4	9.6	0.0127
ENSG00000254858	MPV17L2	MPV17 mitochondrial membrane protein-like 2	4.9	7.13	1.2	10.2	0.0127
ENSG00000168395	ING5	inhibitor of growth family, member 5	2.2	7.12	0.5	5.9	0.0128
ENSG00000167565	SERTAD3	SERTA domain containing 3	2.1	7.11	0.6	4.8	0.0128
ENSG00000235942	LCE6A	late cornified envelope 6A	3	7.09	0.7	7.6	0.0129
ENSG00000139977	NAA30	N(alpha)-acetyltransferase 30, NatC catalytic subunit	3.3	7.08	0.7	8	0.0129
ENSG00000164136	IL15	interleukin 15	-2.9	7.08	-6.7	-0.9	0.0129
ENSG00000106701	FSD1L	fibronectin type III and SPRY domain containing 1-like	-2.6	7.06	-7.5	-0.7	0.013
ENSG00000181458	TMEM45A	transmembrane protein 45A	2.6	7.05	0.6	5.4	0.0131
ENSG00000074276	CDHR2	cadherin-related family member 2	2.4	7.04	0.6	5.8	0.0132
ENSG00000120137	PANK3	pantothenate kinase 3	2.3	7.04	0.5	5.9	0.0132
ENSG00000175155	YPEL2	yippee-like 2 (Drosophila)	3.5	7.04	1	9	0.0132
ENSG00000163166	IWS1	IWS1 homolog (S. cerevisiae)	-3.5	7.03	-8.7	-1.1	0.0132
ENSG00000125740	FOSB	FBJ murine osteosarcoma viral oncogene homolog B	3.2	7.02	0.8	7.1	0.0133
ENSG00000136731	UGGT1	UDP-glucose glycoprotein glucosyltransferase 1	-3.4	7.02	-8.7	-1.2	0.0133
ENSG00000148356	LRSAM1	leucine rich repeat and sterile alpha motif containing 1	-2.6	7.02	-6	-0.9	0.0133
ENSG00000143537	ADAM15	ADAM metallopeptidase domain 15	2.2	7.01	0.7	4.9	0.0133
ENSG00000089041	P2RX7	purinergic receptor P2X, ligand-gated ion channel, 7	4.2	7	1.7	9	0.0133
ENSG00000103510	KAT8	K(lysine) acetyltransferase 8	2.8	6.99	0.7	5.8	0.0134
ENSG00000127334	DYRK2	dual-specificity tyrosine-(Y)-phosphorylation regulated kinase 2	2.3	6.99	0.6	5.3	0.0134
ENSG00000165802	NSMF	NMDA receptor synaptonuclear signaling and neuronal migration factor	2.4	6.97	0.6	7.5	0.0135
ENSG00000177150	FAM210A	family with sequence similarity 210, member A	5	6.97	2.1	11	0.0135
ENSG00000158092	NCK1	NCK adaptor protein 1	2.3	6.97	0.6	5.1	0.0135
ENSG00000268482	AL160274.1	N/A	2.7	6.96	0.9	6	0.0136
ENSG00000146574	CCZ1B	CCZ1 vacuolar protein trafficking and biogenesis associated homolog B (S. cerevisiae)	2.5	6.93	0.7	6.3	0.0137
ENSG00000163818	LZTFL1	leucine zipper transcription factor-like 1	-2	6.91	-5.7	-0.4	0.0138
ENSG00000090920	FCGBP	Fc fragment of IgG binding protein	2.5	6.9	0.5	6.7	0.0139
ENSG00000101367	MAPRE1	microtubule-associated protein, RP/EB family, member 1	2	6.9	0.5	4.4	0.0139
ENSG00000198624	CCDC69	coiled-coil domain containing 69	3.4	6.89	0.8	8.3	0.0139
ENSG00000069956	MAPK6	mitogen-activated protein kinase 6	2.5	6.89	0.6	6.1	0.0139
ENSG00000205795	CYS1	cystin 1	2.4	6.89	0.7	6.3	0.0139
ENSG00000105287	PRKD2	protein kinase D2	1.7	6.89	0.4	3.8	0.0139
ENSG00000043093	DCUN1D1	DCN1, defective in cullin neddylation 1, domain containing 1	1.9	6.89	0.5	4.2	0.0139
ENSG00000197415	VEPH1	ventricular zone expressed PH domain-containing 1	3.8	6.87	0.9	10	0.014
ENSG00000170866	LILRA3	leukocyte immunoglobulin-like receptor, subfamily A (without TM domain), member 3	5.5	6.87	1.9	11	0.014
ENSG00000080824	HSP90AA1	heat shock protein 90kDa alpha (cytosolic), class A member 1	-2.6	6.86	-6.7	-0.6	0.0141
ENSG00000251493	FOXD1	forkhead box D1	-2	6.84	-5.4	-0.5	0.0142
ENSG00000103381	CPPED1	calcineurin-like phosphoesterase domain containing 1	4.1	6.8	0.9	10.2	0.0144
ENSG00000105821	DNAJC2	DnaJ (Hsp40) homolog, subfamily C, member 2	2.1	6.8	0.5	5.1	0.0144
ENSG00000110435	PDHX	pyruvate dehydrogenase complex, component X	2.5	6.8	0.5	6.1	0.0144
ENSG00000137098	SPAG8	sperm associated antigen 8	5	6.79	1.2	10.4	0.0145
ENSG00000170608	FOXA3	forkhead box A3	2.4	6.78	0.6	6.6	0.0146
ENSG00000204422	XXBAC-BPG32J3.20	N/A	-2.6	6.78	-7.3	-0.6	0.0146
ENSG00000134882	UBAC2	UBA domain containing 2	3.2	6.75	0.8	8.6	0.0147
ENSG00000137204	SLC22A7	solute carrier family 22 (organic anion transporter), member 7	3.8	6.75	1.2	9.6	0.0147
ENSG00000119401	TRIM32	tripartite motif containing 32	3.7	6.75	0.7	8.9	0.0147
ENSG00000184007	PTP4A2	protein tyrosine phosphatase type IVA, member 2	2.4	6.74	0.6	8.2	0.0148
ENSG00000179218	CALR	calreticulin	2.7	6.72	0.5	6.5	0.0149
ENSG00000162851	TFB2M	transcription factor B2, mitochondrial	-1.5	6.71	-4	0.1	0.0149
ENSG00000268279	RP11-434D12.1	N/A	3.3	6.69	0.9	7.5	0.0151
ENSG00000163590	PPM1L	protein phosphatase, Mg2+/Mn2+ dependent, 1L	2.2	6.69	0.5	5.5	0.0151
ENSG00000171206	TRIM8	tripartite motif containing 8	2.3	6.69	0.6	5.2	0.0151
ENSG00000006704	GTF2IRD1	GTF2I repeat domain containing 1	-2.3	6.69	-6.4	-0.5	0.0151
ENSG00000167614	TTYH1	tweety family member 1	2.8	6.68	0.5	6.4	0.0151
ENSG00000120903	CHRNA2	cholinergic receptor, nicotinic, alpha 2 (neuronal)	-2.5	6.68	-7.3	-0.6	0.0151
ENSG00000019102	VSIG2	V-set and immunoglobulin domain containing 2	3.5	6.68	1.1	8.5	0.0151
ENSG00000126259	KIRREL2	kin of IRRE like 2 (Drosophila)	2.3	6.68	0.5	5	0.0151
ENSG00000125779	PANK2	pantothenate kinase 2	2.4	6.68	0.7	5.7	0.0151
ENSG00000142676	RPL11	ribosomal protein L11	2.9	6.67	1.2	6	0.0152
ENSG00000125845	BMP2	bone morphogenetic protein 2	2.1	6.66	0.5	4.9	0.0152
ENSG00000241878	PISD	phosphatidylserine decarboxylase	5.6	6.66	2.3	11	0.0152
ENSG00000145331	TRMT10A	tRNA methyltransferase 10 homolog A (S. cerevisiae)	-1.8	6.66	-5	-0.3	0.0152
ENSG00000055955	ITIH4	inter-alpha-trypsin inhibitor heavy chain family, member 4	2.3	6.66	0.6	5.5	0.0152
ENSG00000035681	NSMAF	neutral sphingomyelinase (N-SMase) activation associated factor	2.1	6.64	0.5	5.5	0.0154
ENSG00000182923	CEP63	centrosomal protein 63kDa	2.3	6.64	0.6	8.3	0.0154
ENSG00000179774	ATOH7	atonal homolog 7 (Drosophila)	-1.8	6.62	-4.7	-0.4	0.0155
ENSG00000111913	FAM65B	family with sequence similarity 65, member B	2.4	6.62	0.4	6	0.0155
ENSG00000187902	SHISA7	shisa family member 7	2	6.62	0.2	6	0.0155
ENSG00000196532	HIST1H3C	histone cluster 1, H3c	3.9	6.61	1.6	9	0.0156
ENSG00000198783	ZNF830	zinc finger protein 830	2.5	6.6	0.7	6.1	0.0156
ENSG00000165757	KIAA1462	KIAA1462	3	6.6	0.8	8.1	0.0156
ENSG00000196844	PATE2	prostate and testis expressed 2	2.1	6.6	0.5	4.8	0.0156
ENSG00000163221	S100A12	S100 calcium binding protein A12	3.9	6.6	0.7	9.4	0.0156
ENSG00000103540	CCP110	centriolar coiled coil protein 110kDa	-1.9	6.59	-4.9	-0.4	0.0157
ENSG00000131069	ACSS2	acyl-CoA synthetase short-chain family member 2	-2.2	6.59	-6.2	-0.4	0.0157
ENSG00000126746	ZNF384	zinc finger protein 384	-1.9	6.59	-6	1.1	0.0157
ENSG00000168661	ZNF30	zinc finger protein 30	2.1	6.58	0.4	5.3	0.0158
ENSG00000142065	ZFP14	ZFP14 zinc finger protein	2.3	6.57	0.5	6.2	0.0158
ENSG00000204363	SPANXN5	SPANX family, member N5	2.6	6.57	1	6.6	0.0158
ENSG00000100926	TM9SF1	transmembrane 9 superfamily member 1	-2.3	6.56	-7.3	-0.5	0.0159
ENSG00000142512	SIGLEC10	sialic acid binding Ig-like lectin 10	3.5	6.56	1.3	9	0.0159
ENSG00000130939	UBE4B	ubiquitination factor E4B	-2.9	6.55	-7.4	-0.7	0.0159
ENSG00000106153	CHCHD2	coiled-coil-helix-coiled-coil-helix domain containing 2	3.4	6.55	0.9	8.3	0.0159
ENSG00000198771	RCSD1	RCSD domain containing 1	2.4	6.54	0.5	6.1	0.016
ENSG00000196381	ZNF781	zinc finger protein 781	5.6	6.54	1.6	11	0.016
ENSG00000179913	B3GNT3	UDP-GlcNAc:betaGal beta-1,3-N-acetylglucosaminyltransferase 3	5.7	6.52	2	12	0.0161
ENSG00000198668	CALM1	calmodulin 1 (phosphorylase kinase, delta)	-3.1	6.52	-7	-0.8	0.0161
ENSG00000112659	CUL9	cullin 9	-2.7	6.51	-7.6	-0.6	0.0162
ENSG00000165646	SLC18A2	solute carrier family 18 (vesicular monoamine transporter), member 2	-1.8	6.5	-5.3	-0.3	0.0163
ENSG00000162761	LMX1A	LIM homeobox transcription factor 1, alpha	5	6.48	1.9	11	0.0164
ENSG00000112902	SEMA5A	sema domain, seven thrombospondin repeats (type 1 and type 1-like), transmembrane domain (TM) and short cytoplasmic domain, (semaphorin) 5A	2.4	6.48	-0.2	7	0.0164
ENSG00000187866	FAM122A	family with sequence similarity 122A	3.8	6.47	0.7	8.9	0.0165
ENSG00000099326	MZF1	myeloid zinc finger 1	3.9	6.47	1.3	9.6	0.0165
ENSG00000020426	MNAT1	MNAT CDK-activating kinase assembly factor 1	-2.1	6.46	-5.3	-0.6	0.0165
ENSG00000182944	EWSR1	EWS RNA-binding protein 1	-1.7	6.46	-4.5	-0.4	0.0165
ENSG00000223802	CERS1	ceramide synthase 1	3.4	6.46	0.9	8.8	0.0165
ENSG00000198326	TMEM239	transmembrane protein 239	-2	6.45	-5.7	-0.4	0.0166
ENSG00000187048	CYP4A11	cytochrome P450, family 4, subfamily A, polypeptide 11	2.9	6.45	0.7	8.4	0.0166
ENSG00000088930	XRN2	5'-3' exoribonuclease 2	5.5	6.45	2.2	11	0.0166
ENSG00000125967	NECAB3	N-terminal EF-hand calcium binding protein 3	2	6.44	0.4	5.6	0.0167
ENSG00000259164	RP11-463C8.4	N/A	-2.5	6.44	-6.5	-0.6	0.0167
ENSG00000177542	SLC25A22	solute carrier family 25 (mitochondrial carrier: glutamate), member 22	2.9	6.43	0.8	6.8	0.0168
ENSG00000173809	TDRD12	tudor domain containing 12	3	6.43	0.6	7.2	0.0168
ENSG00000089327	FXYD5	FXYD domain containing ion transport regulator 5	3.1	6.43	0.7	8.6	0.0168
ENSG00000104967	NOVA2	neuro-oncological ventral antigen 2	2	6.42	0.4	5	0.0168
ENSG00000163939	PBRM1	polybromo 1	2.3	6.4	0.4	5	0.017
ENSG00000177051	FBXO46	F-box protein 46	3.6	6.39	0.7	8.8	0.017
ENSG00000086619	ERO1LB	ERO1-like beta (S. cerevisiae)	-1.9	6.39	-5.1	-0.5	0.017
ENSG00000111247	RAD51AP1	RAD51 associated protein 1	2.8	6.39	-1.7	7	0.017
ENSG00000272333	KMT2B	lysine (K)-specific methyltransferase 2B	2.3	6.38	0.6	6.2	0.0171
ENSG00000141560	FN3KRP	fructosamine 3 kinase related protein	2.8	6.37	0.5	7.7	0.0172
ENSG00000161920	MED11	mediator complex subunit 11	3.1	6.37	0.9	6.7	0.0172
ENSG00000167850	CD300C	CD300c molecule	-2.4	6.37	-6.8	-0.4	0.0172
ENSG00000183891	TTC32	tetratricopeptide repeat domain 32	2.7	6.37	0.6	7	0.0172
ENSG00000136448	NMT1	N-myristoyltransferase 1	4.4	6.36	-4	10	0.0173
ENSG00000173531	MST1	macrophage stimulating 1 (hepatocyte growth factor-like)	2.3	6.35	0.6	8.2	0.0173
ENSG00000185313	SCN10A	sodium channel, voltage-gated, type X, alpha subunit	2.6	6.35	0.5	6.9	0.0173
ENSG00000198967	OR10Z1	olfactory receptor, family 10, subfamily Z, member 1	-2.3	6.35	-6.9	-0.3	0.0173
ENSG00000248098	BCKDHA	branched chain keto acid dehydrogenase E1, alpha polypeptide	3.5	6.34	0.8	7.3	0.0174
ENSG00000095539	SEMA4G	sema domain, immunoglobulin domain (Ig), transmembrane domain (TM) and short cytoplasmic domain, (semaphorin) 4G	-2.1	6.33	-6.4	-0.4	0.0175
ENSG00000114923	SLC4A3	solute carrier family 4 (anion exchanger), member 3	2.5	6.33	-0.2	8	0.0175
ENSG00000133111	RFXAP	regulatory factor X-associated protein	2.9	6.32	0.7	6.8	0.0176
ENSG00000160584	SIK3	SIK family kinase 3	1.7	6.31	0.4	4.3	0.0176
ENSG00000137225	CAPN11	calpain 11	5.8	6.31	-1	12	0.0176
ENSG00000179091	CYC1	cytochrome c-1	-2.4	6.31	-6.1	-0.4	0.0176
ENSG00000171862	PTEN	phosphatase and tensin homolog	-2.2	6.3	-7	6.8	0.0177
ENSG00000069667	RORA	RAR-related orphan receptor A	2	6.29	0.5	5.8	0.0178
ENSG00000139835	GRTP1	growth hormone regulated TBC protein 1	2.3	6.29	0.4	8.8	0.0178
ENSG00000167977	KCTD5	potassium channel tetramerization domain containing 5	-2.2	6.28	-6.9	-0.2	0.0179
ENSG00000255940	REXO1L10P	REX1, RNA exonuclease 1 homolog (S. cerevisiae)-like 10, pseudogene	5.5	6.27	1.8	11	0.018
ENSG00000168038	ULK4	unc-51 like kinase 4	-2.3	6.27	-5.6	-0.5	0.018
ENSG00000169710	FASN	fatty acid synthase	1.7	6.25	0.4	4.2	0.0181
ENSG00000158125	XDH	xanthine dehydrogenase	5.1	6.23	1.8	11	0.0183
ENSG00000159905	ZNF221	zinc finger protein 221	3.6	6.22	0.6	9.1	0.0183
ENSG00000090674	MCOLN1	mucolipin 1	1.8	6.22	0.4	6.8	0.0183
ENSG00000184863	RBM33	RNA binding motif protein 33	-2.9	6.22	-7	-0.7	0.0183
ENSG00000161265	U2AF1L4	U2 small nuclear RNA auxiliary factor 1-like 4	1.5	6.21	0.3	4	0.0184
ENSG00000136231	IGF2BP3	insulin-like growth factor 2 mRNA binding protein 3	5.5	6.21	1.4	11	0.0184
ENSG00000249709	ZNF564	zinc finger protein 564	-2.6	6.21	-6.7	-0.5	0.0184
ENSG00000189077	TMEM120A	transmembrane protein 120A	3.7	6.21	1.1	7.7	0.0184
ENSG00000187013	C17ORF82	chromosome 17 open reading frame 82	-3.6	6.2	-9	-1.2	0.0185
ENSG00000114904	NEK4	NIMA-related kinase 4	2	6.2	0.4	6	0.0185
ENSG00000033867	SLC4A7	solute carrier family 4, sodium bicarbonate cotransporter, member 7	2.3	6.2	0.5	5.8	0.0185
ENSG00000166508	MCM7	minichromosome maintenance complex component 7	5.6	6.19	0	11	0.0186
ENSG00000161956	SENP3	SUMO1/sentrin/SMT3 specific peptidase 3	-1.9	6.18	-6.4	-0.3	0.0187
ENSG00000175414	ARL10	ADP-ribosylation factor-like 10	-1.8	6.17	-5.7	-0.2	0.0188
ENSG00000079974	RABL2B	RAB, member of RAS oncogene family-like 2B	-1.6	6.17	-4.8	-0.3	0.0188
ENSG00000100387	RBX1	ring-box 1, E3 ubiquitin protein ligase	-3	6.16	-8	4.2	0.0188
ENSG00000148335	NTMT1	N-terminal Xaa-Pro-Lys N-methyltransferase 1	5.4	6.15	1.9	11	0.0189
ENSG00000189241	TSPYL1	TSPY-like 1	-1.5	6.14	-3.6	-0.4	0.019
ENSG00000079459	FDFT1	farnesyl-diphosphate farnesyltransferase 1	3.4	6.14	0.6	8.2	0.019
ENSG00000148444	COMMD3	COMM domain containing 3	3	6.14	1.2	6	0.019
ENSG00000184702	2018-09-05	septin 5	-2.2	6.14	-6.3	-0.3	0.019
ENSG00000259288	RP11-133K1.2	N/A	4	6.13	1.5	9	0.0191
ENSG00000088356	PDRG1	p53 and DNA-damage regulated 1	-2.2	6.13	-5.8	-0.7	0.0191
ENSG00000269242	CTD-2192J16.22	N/A	3.4	6.13	0.7	8.5	0.0191
ENSG00000185274	WBSCR17	Williams-Beuren syndrome chromosome region 17	2.2	6.13	0.4	6.2	0.0191
ENSG00000198382	UVRAG	UV radiation resistance associated	-1.8	6.12	-4.5	-0.4	0.0192
ENSG00000102786	INTS6	integrator complex subunit 6	-1.7	6.12	-4.6	-0.3	0.0192
ENSG00000167791	CABP2	calcium binding protein 2	2.2	6.11	0.4	5.8	0.0193
ENSG00000176428	VPS37D	vacuolar protein sorting 37 homolog D (S. cerevisiae)	2.7	6.11	0.4	7	0.0193
ENSG00000229453	SPINK8	serine peptidase inhibitor, Kazal type 8 (putative)	-1.9	6.11	-5.3	-0.3	0.0193
ENSG00000166454	ATMIN	ATM interactor	2.1	6.1	0.3	5.8	0.0194
ENSG00000100596	SPTLC2	serine palmitoyltransferase, long chain base subunit 2	2.2	6.1	0.4	6.3	0.0194
ENSG00000120837	NFYB	nuclear transcription factor Y, beta	3.4	6.09	0.9	6.9	0.0195
ENSG00000148634	HERC4	HECT and RLD domain containing E3 ubiquitin protein ligase 4	2.1	6.09	0.4	5.3	0.0195
ENSG00000133136	GNG5P2	guanine nucleotide binding protein (G protein), gamma 5 pseudogene 2	2.1	6.09	0.5	5.3	0.0195
ENSG00000124214	STAU1	staufen double-stranded RNA binding protein 1	-1.9	6.08	-5.7	-0.3	0.0195
ENSG00000269430	LRRC3DN	LRRC3 downstream neighbor (non-protein coding)	-1.9	6.08	-5.5	-0.3	0.0195
ENSG00000153902	LGI4	leucine-rich repeat LGI family, member 4	2.3	6.07	0.6	4.6	0.0196
ENSG00000204371	EHMT2	euchromatic histone-lysine N-methyltransferase 2	2.4	6.06	0.5	5.2	0.0197
ENSG00000152518	ZFP36L2	ZFP36 ring finger protein-like 2	2.5	6.05	0.5	5.6	0.0198
ENSG00000172113	NME6	NME/NM23 nucleoside diphosphate kinase 6	1.9	6.05	0.4	4.3	0.0198
ENSG00000164252	AGGF1	angiogenic factor with G patch and FHA domains 1	2.4	6.05	0.4	5.9	0.0198
ENSG00000180438	TPRXL	tetra-peptide repeat homeobox-like	2.4	6.05	0.6	6.5	0.0198
ENSG00000163738	MTHFD2L	methylenetetrahydrofolate dehydrogenase (NADP+ dependent) 2-like	1.9	6.05	0.4	7.1	0.0198
ENSG00000134900	TPP2	tripeptidyl peptidase II	1.9	6.05	0.4	5.1	0.0198
ENSG00000100242	SUN2	Sad1 and UNC84 domain containing 2	2.1	6.04	0.5	5.7	0.0199
ENSG00000234409	AC006547.14	N/A	3.6	6.03	0.9	7.8	0.02
ENSG00000112306	RPS12	ribosomal protein S12	4.9	6.03	1.8	10	0.02
ENSG00000100201	DDX17	DEAD (Asp-Glu-Ala-Asp) box helicase 17	2.6	6.03	0.5	6	0.02
ENSG00000089123	TASP1	taspase, threonine aspartase, 1	-2.2	6.02	-5.8	-0.4	0.0201
ENSG00000112053	SLC26A8	solute carrier family 26 (anion exchanger), member 8	2.9	6.02	0.5	7.4	0.0201
ENSG00000162711	NLRP3	NLR family, pyrin domain containing 3	2.1	6.02	0.4	5.3	0.0201
ENSG00000069493	CLEC2D	C-type lectin domain family 2, member D	3.6	6.02	1.4	9	0.0201
ENSG00000119953	SMNDC1	survival motor neuron domain containing 1	-1.7	6.01	-4.5	-0.3	0.0202
ENSG00000169418	NPR1	natriuretic peptide receptor 1	-2.3	6.01	-6	-0.4	0.0202
ENSG00000090905	TNRC6A	trinucleotide repeat containing 6A	-1.9	6.01	-5	-0.2	0.0202
ENSG00000231192	OR5H1	olfactory receptor, family 5, subfamily H, member 1	-1.8	6	-5	-0.3	0.0203
ENSG00000166839	ANKDD1A	ankyrin repeat and death domain containing 1A	-2	5.99	-6	-0.2	0.0204
ENSG00000185100	ADSSL1	adenylosuccinate synthase like 1	-2.1	5.99	-6.6	-0.3	0.0204
ENSG00000149925	ALDOA	aldolase A, fructose-bisphosphate	2.1	5.99	0.7	5.6	0.0204
ENSG00000267114	CTB-129P6.11	N/A	2.2	5.99	0.3	5.4	0.0204
ENSG00000205129	C4ORF47	chromosome 4 open reading frame 47	2.4	5.99	0.5	6.7	0.0204
ENSG00000169860	P2RY1	purinergic receptor P2Y, G-protein coupled, 1	2.5	5.98	0.8	8.4	0.0205
ENSG00000197245	FAM110D	family with sequence similarity 110, member D	1.9	5.97	0.2	5.9	0.0206
ENSG00000107959	PITRM1	pitrilysin metallopeptidase 1	-1.5	5.96	-4.9	-0.1	0.0207
ENSG00000203812	HIST2H2AA4	histone cluster 2, H2aa4	3.7	5.96	0.6	9.2	0.0207
ENSG00000156958	GALK2	galactokinase 2	-1.9	5.96	-6	0.4	0.0207
ENSG00000177302	TOP3A	topoisomerase (DNA) III alpha	3.4	5.95	0.9	7.6	0.0208
ENSG00000114391	RPL24	ribosomal protein L24	2.7	5.95	0.7	7	0.0208
ENSG00000166866	MYO1A	myosin IA	2.5	5.93	0.4	9.2	0.021
ENSG00000145861	C1QTNF2	C1q and tumor necrosis factor related protein 2	2.8	5.93	0.5	7.1	0.021
ENSG00000134160	TRPM1	transient receptor potential cation channel, subfamily M, member 1	2.7	5.93	0.5	7.1	0.021
ENSG00000268791	AC093323.1	N/A	1.9	5.93	0.3	5.3	0.021
ENSG00000244482	LILRA6	leukocyte immunoglobulin-like receptor, subfamily A (with TM domain), member 6	3.4	5.93	1.2	7.8	0.021
ENSG00000267849	AL133262.1	N/A	3.5	5.92	1.4	7.9	0.021
ENSG00000162702	ZNF281	zinc finger protein 281	-2	5.92	-5.2	-0.4	0.021
ENSG00000078403	MLLT10	myeloid/lymphoid or mixed-lineage leukemia (trithorax homolog, Drosophila); translocated to, 10	1.7	5.91	0.3	4.4	0.0211
ENSG00000140943	MBTPS1	membrane-bound transcription factor peptidase, site 1	2.5	5.9	0.5	6	0.0213
ENSG00000180198	RCC1	regulator of chromosome condensation 1	4.9	5.9	1.7	10	0.0213
ENSG00000139826	ABHD13	abhydrolase domain containing 13	-2.5	5.9	-6.8	-0.6	0.0213
ENSG00000271698	GS1-393G12.13	N/A	2.8	5.9	0.5	6.1	0.0213
ENSG00000122711	SPINK4	serine peptidase inhibitor, Kazal type 4	2.6	5.9	0.5	6.8	0.0213
ENSG00000188542	DUSP28	dual specificity phosphatase 28	2	5.89	0.4	5	0.0214
ENSG00000259494	MRPL46	mitochondrial ribosomal protein L46	-1.7	5.89	-4.8	-0.3	0.0214
ENSG00000203730	TEDDM1	transmembrane epididymal protein 1	2.5	5.89	0.3	7.2	0.0214
ENSG00000108342	CSF3	colony stimulating factor 3 (granulocyte)	2.7	5.89	0.6	7.5	0.0214
ENSG00000167173	C15ORF39	chromosome 15 open reading frame 39	1.9	5.88	0.4	5.1	0.0215
ENSG00000153896	ZNF599	zinc finger protein 599	1.7	5.88	0.4	4.2	0.0215
ENSG00000171566	PLRG1	pleiotropic regulator 1	3.6	5.87	-1.5	8	0.0215
ENSG00000177479	ARIH2	ariadne RBR E3 ubiquitin protein ligase 2	-1.6	5.87	-4.8	-0.3	0.0215
ENSG00000171217	CLDN20	claudin 20	-1.5	5.87	-5	-0.2	0.0215
ENSG00000237597	GAGE13	G antigen 13	-3.1	5.87	-7.8	-1	0.0215
ENSG00000185246	PRPF39	pre-mRNA processing factor 39	5.3	5.86	1.4	11	0.0216
ENSG00000185019	UBOX5	U-box domain containing 5	-2.4	5.86	-6	-0.3	0.0216
ENSG00000112337	SLC17A2	solute carrier family 17, member 2	3.3	5.85	0.6	8.5	0.0217
ENSG00000117215	PLA2G2D	phospholipase A2, group IID	2.1	5.85	0.4	5.8	0.0217
ENSG00000143771	CNIH4	cornichon family AMPA receptor auxiliary protein 4	-2.2	5.85	-5.5	-0.5	0.0217
ENSG00000175040	CHST2	carbohydrate (N-acetylglucosamine-6-O) sulfotransferase 2	2.7	5.84	0.5	6.9	0.0219
ENSG00000143375	CGN	cingulin	-3.3	5.84	-8	-1	0.0219
ENSG00000116288	PARK7	parkinson protein 7	3.9	5.84	1.2	9	0.0219
ENSG00000157017	GHRL	ghrelin/obestatin prepropeptide	2.2	5.84	0.5	8.3	0.0219
ENSG00000185049	NELFA	negative elongation factor complex member A	2.8	5.84	0.7	7.6	0.0219
ENSG00000121931	LRIF1	ligand dependent nuclear receptor interacting factor 1	2.8	5.82	0.1	6	0.022
ENSG00000181031	RPH3AL	rabphilin 3A-like (without C2 domains)	2.2	5.82	0.2	6.2	0.022
ENSG00000188056	TREML4	triggering receptor expressed on myeloid cells-like 4	5.5	5.81	1.4	11	0.0222
ENSG00000214215	C12ORF74	chromosome 12 open reading frame 74	2.6	5.81	0.5	5.9	0.0222
ENSG00000078018	MAP2	microtubule-associated protein 2	2.6	5.81	0.4	6.4	0.0222
ENSG00000255537	AP000708.1	N/A	2	5.81	0.4	5.1	0.0222
ENSG00000140519	RHCG	Rh family, C glycoprotein	2.6	5.81	0.5	6.8	0.0222
ENSG00000124194	GDAP1L1	ganglioside induced differentiation associated protein 1-like 1	5.7	5.8	1.6	11	0.0223
ENSG00000228008	CTD-2330K9.3	N/A	4.9	5.8	1	10.7	0.0223
ENSG00000272987	OR5AL1	olfactory receptor, family 5, subfamily AL, member 1 (gene/pseudogene)	-1.9	5.79	-4.6	-0.4	0.0224
ENSG00000161981	SNRNP25	small nuclear ribonucleoprotein 25kDa (U11/U12)	-1.7	5.79	-5	-0.1	0.0224
ENSG00000106631	MYL7	myosin, light chain 7, regulatory	5.3	5.79	1.2	11	0.0224
ENSG00000255823	MTRNR2L8	MT-RNR2-like 8	2.7	5.78	1.1	6	0.0225
ENSG00000254667	AP000783.1	N/A	2	5.78	0.3	4.9	0.0225
ENSG00000214844	AC007952.1	N/A	2.2	5.78	0.9	5	0.0225
ENSG00000188783	PRELP	proline/arginine-rich end leucine-rich repeat protein	-1.7	5.78	-4.9	-0.2	0.0225
ENSG00000174953	DHX36	DEAH (Asp-Glu-Ala-His) box polypeptide 36	2.5	5.77	0.5	5.4	0.0226
ENSG00000167359	OR51I1	olfactory receptor, family 51, subfamily I, member 1	3.2	5.77	0	7	0.0226
ENSG00000163734	CXCL3	chemokine (C-X-C motif) ligand 3	3.5	5.76	0.9	8	0.0227
ENSG00000197841	ZNF181	zinc finger protein 181	3.5	5.76	0.7	7.7	0.0227
ENSG00000105329	TGFB1	transforming growth factor, beta 1	1.7	5.76	0.1	5.4	0.0227
ENSG00000171631	P2RY6	pyrimidinergic receptor P2Y, G-protein coupled, 6	-1.4	5.76	-4	0	0.0227
ENSG00000105063	PPP6R1	protein phosphatase 6, regulatory subunit 1	2	5.76	0.4	8	0.0227
ENSG00000102189	EEA1	early endosome antigen 1	3.3	5.76	-6.3	9	0.0227
ENSG00000150627	WDR17	WD repeat domain 17	2.2	5.75	0.3	5	0.0228
ENSG00000137713	PPP2R1B	protein phosphatase 2, regulatory subunit A, beta	3.6	5.75	0.6	9.1	0.0228
ENSG00000139767	SRRM4	serine/arginine repetitive matrix 4	-2.6	5.75	-7	2.8	0.0228
ENSG00000231256	C17ORF105	chromosome 17 open reading frame 105	3.8	5.75	0.7	9.3	0.0228
ENSG00000204178	TMEM57	transmembrane protein 57	-2.1	5.74	-5.5	-0.3	0.0229
ENSG00000120833	SOCS2	suppressor of cytokine signaling 2	-2.1	5.74	-6.2	-0.3	0.0229
ENSG00000197170	PSMD12	proteasome (prosome, macropain) 26S subunit, non-ATPase, 12	3.1	5.73	0.9	7	0.023
ENSG00000269469	CTD-3148I10.9	N/A	2.5	5.73	0.4	5.6	0.023
ENSG00000225950	NTF4	neurotrophin 4	1.8	5.73	0.3	6.9	0.023
ENSG00000198498	TMA16	translation machinery associated 16 homolog (S. cerevisiae)	3.4	5.73	0.6	8	0.023
ENSG00000196420	S100A5	S100 calcium binding protein A5	3.5	5.72	0.9	7.7	0.0231
ENSG00000053900	ANAPC4	anaphase promoting complex subunit 4	-3.8	5.72	-8	-1.3	0.0231
ENSG00000138311	ZNF365	zinc finger protein 365	5.1	5.72	1	11	0.0231
ENSG00000012963	UBR7	ubiquitin protein ligase E3 component n-recognin 7 (putative)	2	5.71	0.1	5	0.0232
ENSG00000185176	AQP12B	aquaporin 12B	-2.2	5.7	-6	0.6	0.0233
ENSG00000124784	RIOK1	RIO kinase 1	-1.8	5.7	-5	-0.4	0.0233
ENSG00000100243	CYB5R3	cytochrome b5 reductase 3	2.6	5.7	-0.2	6	0.0233
ENSG00000165192	ASB11	ankyrin repeat and SOCS box containing 11, E3 ubiquitin protein ligase	5.6	5.7	2.2	11	0.0233
ENSG00000173726	TOMM20	translocase of outer mitochondrial membrane 20 homolog (yeast)	2.3	5.69	0.5	6.3	0.0234
ENSG00000197961	ZNF121	zinc finger protein 121	-2.9	5.69	-8	-0.4	0.0234
ENSG00000069329	VPS35	vacuolar protein sorting 35 homolog (S. cerevisiae)	1.8	5.69	0.2	6.9	0.0234
ENSG00000242107	LINC01100	long intergenic non-protein coding RNA 1100	2.1	5.69	0.3	5	0.0234
ENSG00000240871	KRTAP4-7	keratin associated protein 4-7	2.7	5.69	0.6	6.3	0.0234
ENSG00000102349	KLF8	Kruppel-like factor 8	5.7	5.69	-0.8	11	0.0234
ENSG00000105829	BET1	Bet1 golgi vesicular membrane trafficking protein	-1.7	5.68	-4.6	-0.2	0.0236
ENSG00000105397	TYK2	tyrosine kinase 2	2.2	5.68	0.4	6	0.0236
ENSG00000230873	STMND1	stathmin domain containing 1	2.9	5.68	0.6	6.7	0.0236
ENSG00000261739	GOLGA8S	golgin A8 family, member S	2.2	5.67	0.4	6.4	0.0237
ENSG00000038358	EDC4	enhancer of mRNA decapping 4	-1.8	5.67	-4.5	-0.4	0.0237
ENSG00000064218	DMRT3	doublesex and mab-3 related transcription factor 3	3.1	5.65	0.4	8	0.0239
ENSG00000149483	TMEM138	transmembrane protein 138	2	5.65	0.3	6	0.0239
ENSG00000149716	ORAOV1	oral cancer overexpressed 1	3.5	5.65	0.7	9	0.0239
ENSG00000110713	NUP98	nucleoporin 98kDa	-1.6	5.64	-4.6	-0.2	0.024
ENSG00000005882	PDK2	pyruvate dehydrogenase kinase, isozyme 2	2.3	5.64	0.4	5.6	0.024
ENSG00000149133	OR5F1	olfactory receptor, family 5, subfamily F, member 1	5.5	5.64	-0.9	11	0.024
ENSG00000105656	ELL	elongation factor RNA polymerase II	-1.5	5.64	-3.7	-0.4	0.024
ENSG00000106304	SPAM1	sperm adhesion molecule 1 (PH-20 hyaluronidase, zona pellucida binding)	-2.5	5.64	-7	0.5	0.024
ENSG00000113273	ARSB	arylsulfatase B	-1.9	5.63	-6.6	-0.2	0.0241
ENSG00000099860	GADD45B	growth arrest and DNA-damage-inducible, beta	3.8	5.63	1.2	7.9	0.0241
ENSG00000168234	TTC39C	tetratricopeptide repeat domain 39C	2.7	5.63	0.5	7.2	0.0241
ENSG00000164430	MB21D1	Mab-21 domain containing 1	2.8	5.63	0.5	6.9	0.0241
ENSG00000082556	OPRK1	opioid receptor, kappa 1	3.4	5.63	0.7	7.8	0.0241
ENSG00000116544	DLGAP3	discs, large (Drosophila) homolog-associated protein 3	3.2	5.62	1	8.9	0.0242
ENSG00000122304	PRM2	protamine 2	-2	5.62	-6	-0.1	0.0242
ENSG00000100652	SLC10A1	solute carrier family 10 (sodium/bile acid cotransporter), member 1	-1.7	5.62	-3.6	-0.4	0.0242
ENSG00000213551	DNAJC9	DnaJ (Hsp40) homolog, subfamily C, member 9	5.4	5.61	1.5	11	0.0244
ENSG00000114354	TFG	TRK-fused gene	-2.2	5.6	-6	0.9	0.0245
ENSG00000262664	OVCA2	ovarian tumor suppressor candidate 2	2.7	5.6	0.4	7.9	0.0245
ENSG00000198298	ZNF485	zinc finger protein 485	2	5.6	0.2	5.9	0.0245
ENSG00000248919	ATP5J2-PTCD1	ATP5J2-PTCD1 readthrough	5.2	5.59	1.7	11	0.0246
ENSG00000214021	TTLL3	tubulin tyrosine ligase-like family, member 3	2.9	5.59	0.5	7	0.0246
ENSG00000143882	ATP6V1C2	ATPase, H+ transporting, lysosomal 42kDa, V1 subunit C2	3.2	5.59	0.6	7.5	0.0246
ENSG00000179919	OR10A7	olfactory receptor, family 10, subfamily A, member 7	-2.5	5.59	-6	1.7	0.0246
ENSG00000130119	GNL3L	guanine nucleotide binding protein-like 3 (nucleolar)-like	2.2	5.59	0.5	4.8	0.0246
ENSG00000090054	SPTLC1	serine palmitoyltransferase, long chain base subunit 1	2.8	5.57	0.6	7.7	0.0248
ENSG00000003756	RBM5	RNA binding motif protein 5	1.8	5.57	0.3	4.9	0.0248
ENSG00000176083	ZNF683	zinc finger protein 683	4.7	5.57	1.5	10	0.0248
ENSG00000081818	PCDHB4	protocadherin beta 4	2	5.57	0.3	7.7	0.0248
ENSG00000160408	ST6GALNAC6	ST6 (alpha-N-acetyl-neuraminyl-2,3-beta-galactosyl-1,3)-N-acetylgalactosaminide alpha-2,6-sialyltransferase 6	-3	5.56	-7.6	-0.6	0.0249
ENSG00000237102	AC040160.1	N/A	2.7	5.56	0.4	7.3	0.0249
ENSG00000269804	AL353354.2	N/A	2.5	5.56	0.5	6.4	0.0249
ENSG00000188554	NBR1	neighbor of BRCA1 gene 1	-1.7	5.56	-5.4	-0.2	0.0249
ENSG00000125861	GFRA4	GDNF family receptor alpha 4	4.4	5.55	1.1	9.8	0.025
ENSG00000188760	TMEM198	transmembrane protein 198	5.5	5.55	1.7	11	0.025
ENSG00000043143	JADE2	jade family PHD finger 2	2.1	5.55	0.4	4.7	0.025
ENSG00000170128	GPR25	G protein-coupled receptor 25	2.5	5.54	0.4	6.3	0.0252
ENSG00000105193	RPS16	ribosomal protein S16	5	5.54	1.6	10	0.0252
ENSG00000137814	HAUS2	HAUS augmin-like complex, subunit 2	4.2	5.53	-2.8	9	0.0253
ENSG00000136240	KDELR2	KDEL (Lys-Asp-Glu-Leu) endoplasmic reticulum protein retention receptor 2	4.4	5.53	1.5	10	0.0253
ENSG00000108854	SMURF2	SMAD specific E3 ubiquitin protein ligase 2	2.2	5.52	-2.3	5	0.0254
ENSG00000043355	ZIC2	Zic family member 2	3.4	5.52	0.5	8	0.0254
ENSG00000111275	ALDH2	aldehyde dehydrogenase 2 family (mitochondrial)	-2.9	5.52	-6	0.9	0.0254
ENSG00000156860	FBRS	fibrosin	5	5.51	1	11	0.0255
ENSG00000136237	RAPGEF5	Rap guanine nucleotide exchange factor (GEF) 5	4.4	5.5	1.5	10	0.0256
ENSG00000020256	ZFP64	ZFP64 zinc finger protein	1.6	5.5	0.3	4.2	0.0256
ENSG00000214686	IQCF6	IQ motif containing F6	-2.7	5.5	-7	2.3	0.0256
ENSG00000149308	NPAT	nuclear protein, ataxia-telangiectasia locus	-1.8	5.5	-6	1.5	0.0256
ENSG00000137218	FRS3	fibroblast growth factor receptor substrate 3	2.1	5.49	-0.1	6	0.0257
ENSG00000123329	ARHGAP9	Rho GTPase activating protein 9	3	5.49	0.8	6.8	0.0257
ENSG00000163032	VSNL1	visinin-like 1	2.7	5.49	-0.3	6	0.0257
ENSG00000123561	SERPINA7	serpin peptidase inhibitor, clade A (alpha-1 antiproteinase, antitrypsin), member 7	-2	5.49	-5.5	-0.2	0.0257
ENSG00000131051	RBM39	RNA binding motif protein 39	3.4	5.49	0.8	8.6	0.0257
ENSG00000152034	MCHR2	melanin-concentrating hormone receptor 2	3.3	5.49	-0.7	8	0.0257
ENSG00000184205	TSPYL2	TSPY-like 2	3	5.48	0.5	7.5	0.0259
ENSG00000259202	RP11-342M21.2	N/A	2.2	5.48	0.2	6.2	0.0259
ENSG00000184698	OR51M1	olfactory receptor, family 51, subfamily M, member 1	5.4	5.47	1.4	11	0.026
ENSG00000047648	ARHGAP6	Rho GTPase activating protein 6	3.7	5.46	0.3	10	0.0261
ENSG00000154678	PDE1C	phosphodiesterase 1C, calmodulin-dependent 70kDa	3.1	5.46	-0.1	7	0.0261
ENSG00000156931	VPS8	vacuolar protein sorting 8 homolog (S. cerevisiae)	-1.7	5.46	-5.2	-0.2	0.0261
ENSG00000126822	PLEKHG3	pleckstrin homology domain containing, family G (with RhoGef domain) member 3	2.3	5.46	0.4	6	0.0261
ENSG00000163009	C2ORF48	chromosome 2 open reading frame 48	2.7	5.45	0.4	6.7	0.0262
ENSG00000113389	NPR3	natriuretic peptide receptor 3	-1.6	5.45	-4.4	-0.2	0.0262
ENSG00000153266	FEZF2	FEZ family zinc finger 2	3.4	5.44	-0.4	9	0.0264
ENSG00000165695	AK8	adenylate kinase 8	-2	5.44	-7	3	0.0264
ENSG00000105711	SCN1B	sodium channel, voltage-gated, type I, beta subunit	1.7	5.44	0.2	4.8	0.0264
ENSG00000159082	SYNJ1	synaptojanin 1	-1.5	5.44	-4.1	-0.2	0.0264
ENSG00000168995	SIGLEC7	sialic acid binding Ig-like lectin 7	1.9	5.44	0.2	5.5	0.0264
ENSG00000178057	NDUFAF3	NADH dehydrogenase (ubiquinone) complex I, assembly factor 3	4.6	5.44	1.1	10	0.0264
ENSG00000211751	TRBV25-1	T cell receptor beta variable 25-1	2.3	5.43	0.4	5.8	0.0265
ENSG00000162621	LRRC53	leucine rich repeat containing 53	3.5	5.43	0.4	8	0.0265
ENSG00000170689	HOXB9	homeobox B9	2.8	5.43	0.5	6	0.0265
ENSG00000107164	FUBP3	far upstream element (FUSE) binding protein 3	-1.9	5.42	-5.9	-0.1	0.0266
ENSG00000090612	ZNF268	zinc finger protein 268	-2.3	5.42	-6	0.7	0.0266
ENSG00000103496	STX4	syntaxin 4	5.4	5.41	1.8	11	0.0268
ENSG00000178028	DMAP1	DNA methyltransferase 1 associated protein 1	2.3	5.4	0.4	6.8	0.0269
ENSG00000116833	NR5A2	nuclear receptor subfamily 5, group A, member 2	2.4	5.4	0.3	6.4	0.0269
ENSG00000135870	RC3H1	ring finger and CCCH-type domains 1	-2.8	5.4	-8	3.2	0.0269
ENSG00000171428	NAT1	N-acetyltransferase 1 (arylamine N-acetyltransferase)	-1.8	5.39	-5	-0.3	0.027
ENSG00000131864	USP29	ubiquitin specific peptidase 29	2.7	5.39	0.4	7.2	0.027
ENSG00000009709	PAX7	paired box 7	-2.9	5.39	-8	-0.6	0.027
ENSG00000173110	HSPA6	heat shock 70kDa protein 6 (HSP70B')	2.4	5.39	0.3	7.4	0.027
ENSG00000187238	LCE3B	late cornified envelope 3B	2.5	5.39	0.3	6.2	0.027
ENSG00000181638	ZFP41	ZFP41 zinc finger protein	4.6	5.38	0.8	9.6	0.0272
ENSG00000168769	TET2	tet methylcytosine dioxygenase 2	3	5.38	0.4	7.9	0.0272
ENSG00000080573	COL5A3	collagen, type V, alpha 3	3.2	5.38	0.5	8.4	0.0272
ENSG00000221963	APOL6	apolipoprotein L, 6	4.8	5.37	0.8	10.5	0.0273
ENSG00000182372	CLN8	ceroid-lipofuscinosis, neuronal 8 (epilepsy, progressive with mental retardation)	2.6	5.37	0.4	6.5	0.0273
ENSG00000168779	SHOX2	short stature homeobox 2	-1.9	5.36	-5.8	-0.2	0.0274
ENSG00000137100	DCTN3	dynactin 3 (p22)	-2.2	5.36	-6	-0.4	0.0274
ENSG00000151773	CCDC122	coiled-coil domain containing 122	5.6	5.36	0	11	0.0274
ENSG00000185896	LAMP1	lysosomal-associated membrane protein 1	-1.5	5.36	-4	-0.1	0.0274
ENSG00000119919	NKX2-3	NK2 homeobox 3	3.5	5.36	1	8.9	0.0274
ENSG00000105246	EBI3	Epstein-Barr virus induced 3	-2.7	5.36	-7.8	-0.5	0.0274
ENSG00000248672	LY75-CD302	LY75-CD302 readthrough	5.2	5.35	1.5	11	0.0276
ENSG00000185960	SHOX	short stature homeobox	-2.2	5.35	-6.3	-0.3	0.0276
ENSG00000145782	ATG12	autophagy related 12	2.1	5.35	0.3	5	0.0276
ENSG00000254462	TMX2-CTNND1	TMX2-CTNND1 readthrough (NMD candidate)	-2.1	5.35	-5	-0.8	0.0276
ENSG00000146809	ASB15	ankyrin repeat and SOCS box containing 15	-2.1	5.35	-6	1.9	0.0276
ENSG00000158483	FAM86C1	family with sequence similarity 86, member C1	2.2	5.35	-3.4	5	0.0276
ENSG00000167103	PIP5KL1	phosphatidylinositol-4-phosphate 5-kinase-like 1	4.6	5.34	1.1	9.9	0.0277
ENSG00000162104	ADCY9	adenylate cyclase 9	-2.6	5.34	-6.6	-0.5	0.0277
ENSG00000268852	AC132872.2	N/A	2	5.34	-0.5	6	0.0277
ENSG00000271043	MTRNR2L2	MT-RNR2-like 2	4.2	5.34	1.8	8	0.0277
ENSG00000227057	WDR46	WD repeat domain 46	5.2	5.34	0.7	11	0.0277
ENSG00000185730	ZNF696	zinc finger protein 696	2.9	5.33	0.8	8	0.0278
ENSG00000163630	SYNPR	synaptoporin	2.4	5.33	0.1	6	0.0278
ENSG00000119041	GTF3C3	general transcription factor IIIC, polypeptide 3, 102kDa	5.4	5.33	-1.2	11	0.0278
ENSG00000075213	SEMA3A	sema domain, immunoglobulin domain (Ig), short basic domain, secreted, (semaphorin) 3A	-2	5.32	-5.6	-0.4	0.028
ENSG00000130962	PRRG1	proline rich Gla (G-carboxyglutamic acid) 1	3.1	5.31	-2.6	7	0.0281
ENSG00000181631	P2RY13	purinergic receptor P2Y, G-protein coupled, 13	3.3	5.31	0.3	8	0.0281
ENSG00000167476	JSRP1	junctional sarcoplasmic reticulum protein 1	3.3	5.31	0.8	9	0.0281
ENSG00000119715	ESRRB	estrogen-related receptor beta	3.8	5.3	0.8	9.9	0.0283
ENSG00000197769	MAP1LC3C	microtubule-associated protein 1 light chain 3 gamma	-1.9	5.3	-6	0.4	0.0283
ENSG00000237330	RNF223	ring finger protein 223	1.9	5.3	-0.7	5	0.0283
ENSG00000268628	AL121761.2	N/A	3.8	5.3	0.8	9.5	0.0283
ENSG00000144635	DYNC1LI1	dynein, cytoplasmic 1, light intermediate chain 1	-3.5	5.29	-9	1.4	0.0284
ENSG00000156970	BUB1B	BUB1 mitotic checkpoint serine/threonine kinase B	2.7	5.29	0.7	5.9	0.0284
ENSG00000174327	SLC16A13	solute carrier family 16, member 13	3.4	5.29	0.6	8	0.0284
ENSG00000105518	TMEM205	transmembrane protein 205	4	5.29	0.3	9	0.0284
ENSG00000070495	JMJD6	jumonji domain containing 6	2.9	5.28	0.7	7.3	0.0285
ENSG00000156304	SCAF4	SR-related CTD-associated factor 4	3.3	5.28	0.7	8.7	0.0285
ENSG00000096080	MRPS18A	mitochondrial ribosomal protein S18A	3.2	5.28	0.7	8.5	0.0285
ENSG00000105672	ETV2	ets variant 2	2.8	5.27	0.4	8	0.0286
ENSG00000187735	TCEA1	transcription elongation factor A (SII), 1	-2.2	5.26	-6	-0.1	0.0288
ENSG00000267531	AC020922.1	N/A	2.4	5.26	0.5	6.2	0.0288
ENSG00000097096	SYDE2	synapse defective 1, Rho GTPase, homolog 2 (C. elegans)	3.5	5.26	0.7	8.6	0.0288
ENSG00000233198	RNF224	ring finger protein 224	3.4	5.26	0.6	8.4	0.0288
ENSG00000132464	ENAM	enamelin	3.7	5.26	0.7	9.3	0.0288
ENSG00000188316	ENO4	enolase family member 4	-2.5	5.25	-7	0.3	0.0289
ENSG00000153944	MSI2	musashi RNA-binding protein 2	-2.4	5.25	-6.6	-0.3	0.0289
ENSG00000171116	HSFX1	heat shock transcription factor family, X linked 1	-2	5.25	-5.6	-0.3	0.0289
ENSG00000257726	RP11-116D17.1	N/A	2.9	5.24	0.4	7	0.0291
ENSG00000124575	HIST1H1D	histone cluster 1, H1d	1.7	5.24	0.3	3.9	0.0291
ENSG00000164332	UBLCP1	ubiquitin-like domain containing CTD phosphatase 1	-1.9	5.24	-6.6	-0.2	0.0291
ENSG00000174992	ZG16	zymogen granule protein 16	3.7	5.24	-1.5	9	0.0291
ENSG00000139624	CERS5	ceramide synthase 5	-2.4	5.24	-6.6	-0.4	0.0291
ENSG00000176160	HSF5	heat shock transcription factor family member 5	4.7	5.23	0.1	10	0.0292
ENSG00000113649	TCERG1	transcription elongation regulator 1	2.1	5.23	0.3	5	0.0292
ENSG00000168412	MTNR1A	melatonin receptor 1A	5.4	5.22	1.3	11	0.0293
ENSG00000151849	CENPJ	centromere protein J	3.1	5.22	0.5	8.9	0.0293
ENSG00000139324	TMTC3	transmembrane and tetratricopeptide repeat containing 3	-2.4	5.22	-6.8	-0.2	0.0293
ENSG00000183814	LIN9	lin-9 DREAM MuvB core complex component	-1.7	5.21	-4.8	-0.3	0.0295
ENSG00000205189	ZBTB10	zinc finger and BTB domain containing 10	1.6	5.21	-0.1	5.9	0.0295
ENSG00000170899	GSTA4	glutathione S-transferase alpha 4	1.9	5.21	0.4	7.2	0.0295
ENSG00000144354	CDCA7	cell division cycle associated 7	-1.7	5.21	-4.9	-0.2	0.0295
ENSG00000185745	IFIT1	interferon-induced protein with tetratricopeptide repeats 1	4.6	5.2	1.1	9.8	0.0296
ENSG00000129933	MAU2	MAU2 sister chromatid cohesion factor	3	5.2	0.6	6.8	0.0296
ENSG00000171408	PDE7B	phosphodiesterase 7B	3	5.2	0.1	8	0.0296
ENSG00000198162	MAN1A2	mannosidase, alpha, class 1A, member 2	2.4	5.2	0.3	6.5	0.0296
ENSG00000136758	YME1L1	YME1-like 1 ATPase	-1.6	5.2	-6	3.6	0.0296
ENSG00000182759	MAFA	v-maf avian musculoaponeurotic fibrosarcoma oncogene homolog A	5.5	5.2	1.6	11	0.0296
ENSG00000100296	THOC5	THO complex 5	3.6	5.19	0.9	7.8	0.0298
ENSG00000174871	CNIH2	cornichon family AMPA receptor auxiliary protein 2	2.3	5.19	0.2	6.4	0.0298
ENSG00000135473	PAN2	PAN2 poly(A) specific ribonuclease subunit	1.8	5.19	0.3	5.4	0.0298
ENSG00000148386	LCN9	lipocalin 9	-2.4	5.19	-7.3	-0.4	0.0298
ENSG00000197403	OR6N1	olfactory receptor, family 6, subfamily N, member 1	2.4	5.19	-1	7	0.0298
ENSG00000174788	PCP2	Purkinje cell protein 2	2.1	5.19	0.3	5	0.0298
ENSG00000182183	FAM159A	family with sequence similarity 159, member A	-1.9	5.19	-5.4	-0.2	0.0298
ENSG00000084090	STARD7	StAR-related lipid transfer (START) domain containing 7	2.5	5.18	0.5	6.3	0.0299
ENSG00000128710	HOXD10	homeobox D10	-2	5.18	-6	0	0.0299
ENSG00000185619	PCGF3	polycomb group ring finger 3	5.5	5.16	1.4	11	0.0302
ENSG00000169071	ROR2	receptor tyrosine kinase-like orphan receptor 2	2	5.16	0.1	5.9	0.0302
ENSG00000238074	TSPY6P	testis specific protein, Y-linked 6, pseudogene	3.6	5.16	-1	8	0.0302
ENSG00000156885	COX6A2	cytochrome c oxidase subunit VIa polypeptide 2	2.1	5.16	0.4	5.3	0.0302
ENSG00000139656	SMIM2	small integral membrane protein 2	-1.7	5.16	-6	3.4	0.0302
ENSG00000165006	UBAP1	ubiquitin associated protein 1	5.5	5.15	1.6	11	0.0304
ENSG00000177548	RABEP2	rabaptin, RAB GTPase binding effector protein 2	2.6	5.15	0.4	5.9	0.0304
ENSG00000066322	ELOVL1	ELOVL fatty acid elongase 1	2.2	5.15	0.2	6.1	0.0304
ENSG00000188229	TUBB4B	tubulin, beta 4B class IVb	-2.1	5.15	-6	-0.1	0.0304
ENSG00000128016	ZFP36	ZFP36 ring finger protein	4.7	5.14	0.9	9.7	0.0305
ENSG00000111087	GLI1	GLI family zinc finger 1	3.6	5.14	0.7	8	0.0305
ENSG00000164414	SLC35A1	solute carrier family 35 (CMP-sialic acid transporter), member A1	-2.5	5.14	-6.4	-0.5	0.0305
ENSG00000179626	OR6C4	olfactory receptor, family 6, subfamily C, member 4	5.1	5.14	1.6	11	0.0305
ENSG00000159217	IGF2BP1	insulin-like growth factor 2 mRNA binding protein 1	-2.5	5.13	-7	1.3	0.0307
ENSG00000189001	SBSN	suprabasin	2.1	5.13	0.2	6.5	0.0307
ENSG00000174197	MGA	MGA, MAX dimerization protein	-1.8	5.12	-6	0.5	0.0308
ENSG00000185721	DRG1	developmentally regulated GTP binding protein 1	4.4	5.12	0.6	9.7	0.0308
ENSG00000115295	CLIP4	CAP-GLY domain containing linker protein family, member 4	2.1	5.12	0.3	6.5	0.0308
ENSG00000134744	ZCCHC11	zinc finger, CCHC domain containing 11	2.6	5.12	0.3	7	0.0308
ENSG00000261832	CLN3	ceroid-lipofuscinosis, neuronal 3	1.6	5.12	0.2	4.8	0.0308
ENSG00000164220	F2RL2	coagulation factor II (thrombin) receptor-like 2	-2.3	5.12	-5.8	-0.5	0.0308
ENSG00000072041	SLC6A15	solute carrier family 6 (neutral amino acid transporter), member 15	2.6	5.12	0.2	8	0.0308
ENSG00000168538	TRAPPC11	trafficking protein particle complex 11	2.7	5.12	0	7	0.0308
ENSG00000137675	MMP27	matrix metallopeptidase 27	2.2	5.11	0.2	6.6	0.031
ENSG00000146701	MDH2	malate dehydrogenase 2, NAD (mitochondrial)	-1.6	5.11	-5.1	-0.1	0.031
ENSG00000204936	CD177	CD177 molecule	1.8	5.1	-0.3	5	0.0311
ENSG00000102978	POLR2C	polymerase (RNA) II (DNA directed) polypeptide C, 33kDa	2.6	5.1	0.7	7.7	0.0311
ENSG00000188846	RPL14	ribosomal protein L14	1.9	5.1	0.2	5.3	0.0311
ENSG00000011426	ANLN	anillin, actin binding protein	4	5.1	-2.6	9	0.0311
ENSG00000166682	TMPRSS5	transmembrane protease, serine 5	2.3	5.1	0.2	6.4	0.0311
ENSG00000214827	MTCP1	mature T-cell proliferation 1	-2.1	5.09	-6.6	-0.3	0.0313
ENSG00000170515	PA2G4	proliferation-associated 2G4, 38kDa	3.4	5.08	0.4	9	0.0314
ENSG00000211776	TRAV2	T cell receptor alpha variable 2	4.9	5.07	0.9	10	0.0316
ENSG00000250349	TM4SF2	N/A	3.7	5.07	1.4	8	0.0316
ENSG00000127241	MASP1	mannan-binding lectin serine peptidase 1 (C4/C2 activating component of Ra-reactive factor)	-2.1	5.07	-5.9	-0.2	0.0316
ENSG00000179755	CTD-2144E22.5	N/A	2.3	5.06	0.5	6.2	0.0318
ENSG00000138069	RAB1A	RAB1A, member RAS oncogene family	2.7	5.06	0.5	7	0.0318
ENSG00000233412	OR5H15	olfactory receptor, family 5, subfamily H, member 15	3.3	5.06	-2.1	7	0.0318
ENSG00000138778	CENPE	centromere protein E, 312kDa	-1.8	5.06	-4.8	-0.3	0.0318
ENSG00000188404	SELL	selectin L	5.3	5.06	1.1	11	0.0318
ENSG00000029364	SLC39A9	solute carrier family 39, member 9	-2	5.05	-6.2	-0.2	0.0319
ENSG00000187600	TMEM247	transmembrane protein 247	3.5	5.05	0.9	9	0.0319
ENSG00000068137	PLEKHH3	pleckstrin homology domain containing, family H (with MyTH4 domain) member 3	2.5	5.05	0.3	6.7	0.0319
ENSG00000115234	SNX17	sorting nexin 17	3.3	5.05	0.4	8.7	0.0319
ENSG00000253350	RP11-127H5.1	N/A	-2.3	5.04	-6	0	0.0321
ENSG00000112081	SRSF3	serine/arginine-rich splicing factor 3	4.8	5.03	0.5	10	0.0322
ENSG00000243244	STON1	stonin 1	3.7	5.03	1.2	7.9	0.0322
ENSG00000198946	SSX4B	synovial sarcoma, X breakpoint 4B	-1.5	5.03	-5	4.6	0.0322
ENSG00000164329	PAPD4	PAP associated domain containing 4	2.6	5.02	0.2	6	0.0324
ENSG00000112062	MAPK14	mitogen-activated protein kinase 14	-1.8	5.02	-5.8	0	0.0324
ENSG00000111142	METAP2	methionyl aminopeptidase 2	-1.5	5.02	-4.6	-0.2	0.0324
ENSG00000131471	AOC3	amine oxidase, copper containing 3	2.3	5.02	0	7	0.0324
ENSG00000107807	TLX1	T-cell leukemia homeobox 1	1.8	5.02	0.1	4.7	0.0324
ENSG00000267168	RP11-318A15.7	N/A	4.8	5.02	1.3	10	0.0324
ENSG00000169248	CXCL11	chemokine (C-X-C motif) ligand 11	-2.3	5.01	-6	0.4	0.0325
ENSG00000171608	PIK3CD	phosphatidylinositol-4,5-bisphosphate 3-kinase, catalytic subunit delta	2.4	5.01	0.4	5.4	0.0325
ENSG00000105261	OVOL3	ovo-like zinc finger 3	1.7	5.01	0.2	5.3	0.0325
ENSG00000138075	ABCG5	ATP-binding cassette, sub-family G (WHITE), member 5	3	5	0.5	8.7	0.0327
ENSG00000197483	ZNF628	zinc finger protein 628	2	5	0.3	5.9	0.0327
ENSG00000231068	KRTAP21-3	keratin associated protein 21-3	4.2	5	1	8.9	0.0327
ENSG00000147955	SIGMAR1	sigma non-opioid intracellular receptor 1	-2.1	5	-7	-0.2	0.0327
ENSG00000152611	CAPSL	calcyphosine-like	2.6	5	-1.2	8	0.0327
ENSG00000148604	RGR	retinal G protein coupled receptor	-2	5	-6	1	0.0327
ENSG00000166589	CDH16	cadherin 16, KSP-cadherin	-2	5	-5.9	-0.1	0.0327
ENSG00000121413	ZSCAN18	zinc finger and SCAN domain containing 18	2.5	5	0.5	6.3	0.0327
ENSG00000132963	POMP	proteasome maturation protein	3.4	4.99	0.8	8.8	0.0329
ENSG00000163283	ALPP	alkaline phosphatase, placental	-2.7	4.99	-7	3.5	0.0329
ENSG00000128581	RABL5	N/A	2.9	4.99	0.4	7.8	0.0329
ENSG00000172007	RAB33B	RAB33B, member RAS oncogene family	2.9	4.98	0.5	8	0.033
ENSG00000142233	NTN5	netrin 5	1.8	4.98	0	5.8	0.033
ENSG00000204978	C19ORF69	N/A	2.1	4.98	0.2	5	0.033
ENSG00000137942	FNBP1L	formin binding protein 1-like	-3	4.98	-7	0.4	0.033
ENSG00000257046	LST3	N/A	-1.7	4.97	-5.7	0.2	0.0332
ENSG00000243660	ZNF487	zinc finger protein 487	-2.6	4.97	-7	-0.3	0.0332
ENSG00000180475	OR10Q1	olfactory receptor, family 10, subfamily Q, member 1	-1.6	4.96	-5	0	0.0333
ENSG00000143105	KCNA10	potassium voltage-gated channel, shaker-related subfamily, member 10	2.2	4.96	0.2	6.1	0.0333
ENSG00000214456	PLIN5	perilipin 5	3.2	4.96	0.4	7	0.0333
ENSG00000221819	C16ORF3	chromosome 16 open reading frame 3	3.1	4.96	0.5	8.4	0.0333
ENSG00000164466	SFXN1	sideroflexin 1	2	4.94	0.3	4.4	0.0337
ENSG00000075624	ACTB	actin, beta	2.6	4.94	0.6	5.7	0.0337
ENSG00000155189	AGPAT5	1-acylglycerol-3-phosphate O-acyltransferase 5	2	4.94	0.3	4.4	0.0337
ENSG00000150776	C11ORF57	chromosome 11 open reading frame 57	1.7	4.94	0.2	5.4	0.0337
ENSG00000212935	KRTAP10-3	keratin associated protein 10-3	2.1	4.93	0.2	6	0.0338
ENSG00000141968	VAV1	vav 1 guanine nucleotide exchange factor	2.8	4.93	0.4	7	0.0338
ENSG00000083520	DIS3	DIS3 exosome endoribonuclease and 3'-5' exoribonuclease	3	4.93	0.2	7	0.0338
ENSG00000150628	SPATA4	spermatogenesis associated 4	5	4.93	1	11	0.0338
ENSG00000136944	LMX1B	LIM homeobox transcription factor 1, beta	-2	4.92	-5.5	-0.2	0.034
ENSG00000109705	NKX3-2	NK3 homeobox 2	2.9	4.92	-0.3	8	0.034
ENSG00000239511	POM121L7	POM121 transmembrane nucleoporin-like 7	2.6	4.92	0.9	6	0.034
ENSG00000198715	C1ORF85	chromosome 1 open reading frame 85	-2.1	4.92	-6	1.9	0.034
ENSG00000105369	CD79A	CD79a molecule, immunoglobulin-associated alpha	1.9	4.92	0.3	5.5	0.034
ENSG00000267964	AC022400.2	N/A	2.8	4.92	0.4	6.5	0.034
ENSG00000198399	ITSN2	intersectin 2	-2	4.92	-7	2.1	0.034
ENSG00000168916	ZNF608	zinc finger protein 608	-2.2	4.92	-5.5	-0.5	0.034
ENSG00000211734	TRBV5-1	T cell receptor beta variable 5-1	-2.4	4.92	-7	5.2	0.034
ENSG00000197852	FAM212B	family with sequence similarity 212, member B	3.4	4.91	1.1	8.7	0.0342
ENSG00000130005	GAMT	guanidinoacetate N-methyltransferase	-2.2	4.91	-6	-0.2	0.0342
ENSG00000106344	RBM28	RNA binding motif protein 28	5.6	4.91	-0.2	11	0.0342
ENSG00000130653	PNPLA7	patatin-like phospholipase domain containing 7	-2.2	4.91	-7	0.9	0.0342
ENSG00000149532	CPSF7	cleavage and polyadenylation specific factor 7, 59kDa	-2.2	4.9	-5.7	-0.4	0.0344
ENSG00000156222	SLC28A1	solute carrier family 28 (concentrative nucleoside transporter), member 1	3.8	4.9	0.9	8	0.0344
ENSG00000104321	TRPA1	transient receptor potential cation channel, subfamily A, member 1	-1.9	4.89	-6	-0.1	0.0345
ENSG00000101132	PFDN4	prefoldin subunit 4	-2.3	4.89	-7	0.5	0.0345
ENSG00000204131	NHSL2	NHS-like 2	-2.3	4.89	-5.7	-0.4	0.0345
ENSG00000136014	USP44	ubiquitin specific peptidase 44	-2.3	4.89	-6.9	-0.2	0.0345
ENSG00000095932	C19ORF77	N/A	1.7	4.89	0.2	4.9	0.0345
ENSG00000072571	HMMR	hyaluronan-mediated motility receptor (RHAMM)	2.2	4.88	-1	6	0.0347
ENSG00000122194	PLG	plasminogen	4.4	4.88	0.6	10	0.0347
ENSG00000263053	RP11-1055B8.6	N/A	5.4	4.87	1.8	11	0.0349
ENSG00000165806	CASP7	caspase 7, apoptosis-related cysteine peptidase	-2.2	4.87	-7	0.8	0.0349
ENSG00000198838	RYR3	ryanodine receptor 3	-2	4.87	-6.9	0.1	0.0349
ENSG00000132334	PTPRE	protein tyrosine phosphatase, receptor type, E	-2.4	4.86	-7.6	-0.3	0.0351
ENSG00000164961	KIAA0196	KIAA0196	2.5	4.86	0.4	5.9	0.0351
ENSG00000159352	PSMD4	proteasome (prosome, macropain) 26S subunit, non-ATPase, 4	2.9	4.86	-0.3	8	0.0351
ENSG00000108511	HOXB6	homeobox B6	-1.8	4.85	-5	3.8	0.0353
ENSG00000151655	ITIH2	inter-alpha-trypsin inhibitor heavy chain 2	2.4	4.85	-0.2	7	0.0353
ENSG00000204709	C6ORF100	chromosome 6 open reading frame 100	2.1	4.85	0.2	6	0.0353
ENSG00000186973	FAM183A	family with sequence similarity 183, member A	-2.1	4.84	-6	2.8	0.0354
ENSG00000100106	TRIOBP	TRIO and F-actin binding protein	2	4.84	-0.9	6.8	0.0354
ENSG00000197734	C14ORF178	chromosome 14 open reading frame 178	1.7	4.84	-1.5	6	0.0354
ENSG00000259529	RP11-468E2.4	N/A	3.5	4.84	-1.5	8	0.0354
ENSG00000184588	PDE4B	phosphodiesterase 4B, cAMP-specific	-1.6	4.84	-5	1.2	0.0354
ENSG00000161551	ZNF577	zinc finger protein 577	2.9	4.83	-1.8	7	0.0356
ENSG00000211450	C11ORF31	chromosome 11 open reading frame 31	1.7	4.83	0.3	4.4	0.0356
ENSG00000127564	PKMYT1	protein kinase, membrane associated tyrosine/threonine 1	4.1	4.83	0.7	9	0.0356
ENSG00000272921	RP11-500M8.7	N/A	-2.5	4.83	-6	-0.4	0.0356
ENSG00000074054	CLASP1	cytoplasmic linker associated protein 1	2.1	4.83	0.4	7.3	0.0356
ENSG00000183943	PRKX	protein kinase, X-linked	3.5	4.83	-0.4	9	0.0356
ENSG00000188342	GTF2F2	general transcription factor IIF, polypeptide 2, 30kDa	-2	4.82	-6	0	0.0358
ENSG00000185052	SLC24A3	solute carrier family 24 (sodium/potassium/calcium exchanger), member 3	5.4	4.82	-1.9	11	0.0358
ENSG00000181544	FANCB	Fanconi anemia, complementation group B	1.6	4.82	0.1	4.7	0.0358
ENSG00000127533	F2RL3	coagulation factor II (thrombin) receptor-like 3	-1.9	4.82	-6	0.2	0.0358
ENSG00000075218	GTSE1	G-2 and S-phase expressed 1	-2.3	4.82	-6.7	-0.2	0.0358
ENSG00000183396	TMEM89	transmembrane protein 89	-1.9	4.81	-5.6	-0.2	0.036
ENSG00000181092	ADIPOQ	adiponectin, C1Q and collagen domain containing	2.2	4.81	-0.2	7	0.036
ENSG00000181026	AEN	apoptosis enhancing nuclease	3	4.8	-2	7	0.0361
ENSG00000158874	APOA2	apolipoprotein A-II	-2.4	4.8	-8	1	0.0361
ENSG00000089335	ZNF302	zinc finger protein 302	2.6	4.79	0.2	7.5	0.0363
ENSG00000144589	STK11IP	serine/threonine kinase 11 interacting protein	2.3	4.79	0.2	5.9	0.0363
ENSG00000196184	OR10J1	olfactory receptor, family 10, subfamily J, member 1	-1.6	4.79	-4.8	-0.1	0.0363
ENSG00000088035	ALG6	ALG6, alpha-1,3-glucosyltransferase	4.4	4.79	-0.6	9	0.0363
ENSG00000188393	CLEC2A	C-type lectin domain family 2, member A	-1.6	4.79	-4.2	-0.2	0.0363
ENSG00000086730	LAT2	linker for activation of T cells family, member 2	3.2	4.79	0.4	8.7	0.0363
ENSG00000071994	PDCD2	programmed cell death 2	2.8	4.78	0.6	6.5	0.0365
ENSG00000100365	NCF4	neutrophil cytosolic factor 4, 40kDa	4.4	4.78	0.8	9.9	0.0365
ENSG00000184154	LRTOMT	leucine rich transmembrane and O-methyltransferase domain containing	3.7	4.78	0.4	10	0.0365
ENSG00000212670	AL161915.1	N/A	2.3	4.78	0.3	6	0.0365
ENSG00000106635	BCL7B	B-cell CLL/lymphoma 7B	3.9	4.78	-2.7	8	0.0365
ENSG00000180806	HOXC9	homeobox C9	3.2	4.77	0.8	6.9	0.0367
ENSG00000132321	IQCA1	IQ motif containing with AAA domain 1	-1.8	4.77	-5	0.9	0.0367
ENSG00000188315	C3ORF62	chromosome 3 open reading frame 62	5.4	4.77	2	11	0.0367
ENSG00000185594	SPATA8	spermatogenesis associated 8	2.4	4.77	0.3	6.1	0.0367
ENSG00000092009	CMA1	chymase 1, mast cell	2.3	4.77	-0.9	6	0.0367
ENSG00000119421	NDUFA8	NADH dehydrogenase (ubiquinone) 1 alpha subcomplex, 8, 19kDa	5.6	4.76	1.3	11	0.0369
ENSG00000141696	LEPREL4	leprecan-like 4	-2.2	4.76	-6	0.4	0.0369
ENSG00000147316	MCPH1	microcephalin 1	-2.4	4.75	-6	4.1	0.0371
ENSG00000077585	GPR137B	G protein-coupled receptor 137B	-2.1	4.75	-7	-0.2	0.0371
ENSG00000128563	PRKRIP1	PRKR interacting protein 1 (IL11 inducible)	1.6	4.75	0.1	6.8	0.0371
ENSG00000160801	PTH1R	parathyroid hormone 1 receptor	4.8	4.75	0.2	10	0.0371
ENSG00000142156	COL6A1	collagen, type VI, alpha 1	2.7	4.74	0.2	6.9	0.0373
ENSG00000165617	DACT1	dishevelled-binding antagonist of beta-catenin 1	2.5	4.74	0.4	6.6	0.0373
ENSG00000101255	TRIB3	tribbles pseudokinase 3	5.2	4.74	0.5	11	0.0373
ENSG00000038427	VCAN	versican	-2.3	4.74	-7	0.1	0.0373
ENSG00000172199	OR8U1	olfactory receptor, family 8, subfamily U, member 1	-1.8	4.73	-5	1.2	0.0375
ENSG00000237388	OR4A47	olfactory receptor, family 4, subfamily A, member 47	-1.5	4.73	-5	1.1	0.0375
ENSG00000002822	MAD1L1	MAD1 mitotic arrest deficient-like 1 (yeast)	1.9	4.73	0.2	5	0.0375
ENSG00000138286	FAM149B1	family with sequence similarity 149, member B1	1.9	4.73	-1.6	6.5	0.0375
ENSG00000181072	CHRM2	cholinergic receptor, muscarinic 2	-1.7	4.73	-5.8	1.2	0.0375
ENSG00000186868	MAPT	microtubule-associated protein tau	-1.6	4.73	-4.6	-0.1	0.0375
ENSG00000128714	HOXD13	homeobox D13	2.3	4.73	0.6	8.7	0.0375
ENSG00000088782	DEFB127	defensin, beta 127	-2.1	4.73	-6.8	-0.2	0.0375
ENSG00000186235	AC016757.3	N/A	1.9	4.73	0.1	5.7	0.0375
ENSG00000103035	PSMD7	proteasome (prosome, macropain) 26S subunit, non-ATPase, 7	-1.4	4.73	-4.6	-0.1	0.0375
ENSG00000111641	NOP2	NOP2 nucleolar protein	-1.7	4.72	-6	0.2	0.0377
ENSG00000136367	ZFHX2	zinc finger homeobox 2	3.2	4.72	0.3	8	0.0377
ENSG00000231274	SBK3	SH3 domain binding kinase family, member 3	2.5	4.72	0.5	6.9	0.0377
ENSG00000205659	LIN52	lin-52 DREAM MuvB core complex component	-2.9	4.72	-7	-0.1	0.0377
ENSG00000115421	PAPOLG	poly(A) polymerase gamma	2.2	4.72	-0.3	6.8	0.0377
ENSG00000177257	DEFB4B	defensin, beta 4B	-2.1	4.72	-5	0.5	0.0377
ENSG00000166341	DCHS1	dachsous cadherin-related 1	5.4	4.72	1.8	11	0.0377
ENSG00000080031	PTPRH	protein tyrosine phosphatase, receptor type, H	2	4.71	0.2	5	0.0378
ENSG00000141644	MBD1	methyl-CpG binding domain protein 1	2.8	4.71	0.1	8	0.0378
ENSG00000184640	2018-09-09	septin 9	1.9	4.71	-0.1	6	0.0378
ENSG00000148602	LRIT1	leucine-rich repeat, immunoglobulin-like and transmembrane domains 1	-2.6	4.71	-6.9	-0.5	0.0378
ENSG00000160410	SHKBP1	SH3KBP1 binding protein 1	1.5	4.71	0.2	3.5	0.0378
ENSG00000019186	CYP24A1	cytochrome P450, family 24, subfamily A, polypeptide 1	-3.4	4.71	-9	-0.7	0.0378
ENSG00000164972	C9ORF24	chromosome 9 open reading frame 24	2.2	4.71	-0.1	6	0.0378
ENSG00000260027	HOXB7	homeobox B7	3	4.71	-0.2	9	0.0378
ENSG00000123815	ADCK4	aarF domain containing kinase 4	1.9	4.71	-0.4	6	0.0378
ENSG00000170088	TMEM192	transmembrane protein 192	1.5	4.71	0.2	4.1	0.0378
ENSG00000179833	SERTAD2	SERTA domain containing 2	1.7	4.7	-0.6	6	0.038
ENSG00000213780	GTF2H4	general transcription factor IIH, polypeptide 4, 52kDa	5	4.7	-3.4	10	0.038
ENSG00000169469	SPRR1B	small proline-rich protein 1B	-1.8	4.7	-5	0.5	0.038
ENSG00000121871	SLITRK3	SLIT and NTRK-like family, member 3	-2.4	4.7	-7	1	0.038
ENSG00000126752	SSX1	synovial sarcoma, X breakpoint 1	-1.6	4.7	-4.6	-0.1	0.038
ENSG00000069482	GAL	galanin/GMAP prepropeptide	1.7	4.7	0.1	5.7	0.038
ENSG00000084652	TXLNA	taxilin alpha	2	4.7	0.1	6.1	0.038
ENSG00000120697	ALG5	ALG5, dolichyl-phosphate beta-glucosyltransferase	-1.8	4.69	-6	0.5	0.0382
ENSG00000130402	ACTN4	actinin, alpha 4	1.6	4.68	0.2	4.3	0.0384
ENSG00000186827	TNFRSF4	tumor necrosis factor receptor superfamily, member 4	2.9	4.68	0.5	7.8	0.0384
ENSG00000152253	SPC25	SPC25, NDC80 kinetochore complex component	-2	4.68	-5.5	-0.4	0.0384
ENSG00000119574	ZBTB45	zinc finger and BTB domain containing 45	3.4	4.68	1.1	9	0.0384
ENSG00000160124	CCDC58	coiled-coil domain containing 58	3.6	4.67	-1.9	9	0.0386
ENSG00000170312	CDK1	cyclin-dependent kinase 1	2.4	4.67	0.4	6.7	0.0386
ENSG00000100225	FBXO7	F-box protein 7	2.3	4.67	0	6.8	0.0386
ENSG00000161057	PSMC2	proteasome (prosome, macropain) 26S subunit, ATPase, 2	3.3	4.67	-0.8	9	0.0386
ENSG00000151276	MAGI1	membrane associated guanylate kinase, WW and PDZ domain containing 1	-2.2	4.67	-7	-0.2	0.0386
ENSG00000211460	TSN	translin	-2.3	4.67	-6.9	-0.3	0.0386
ENSG00000196705	ZNF431	zinc finger protein 431	2.5	4.66	0.2	7.8	0.0388
ENSG00000143549	TPM3	tropomyosin 3	2.7	4.66	-0.3	7	0.0388
ENSG00000227152	OR2T7	olfactory receptor, family 2, subfamily T, member 7	-1.8	4.66	-4.5	-0.3	0.0388
ENSG00000168939	SPRY3	sprouty homolog 3 (Drosophila)	3.6	4.66	0.4	10	0.0388
ENSG00000132467	UTP3	UTP3, small subunit (SSU) processome component, homolog (S. cerevisiae)	-1.5	4.66	-4	1.1	0.0388
ENSG00000083444	PLOD1	procollagen-lysine, 2-oxoglutarate 5-dioxygenase 1	5.5	4.65	1.3	11	0.039
ENSG00000101470	TNNC2	troponin C type 2 (fast)	-1.6	4.65	-4.9	-0.1	0.039
ENSG00000147862	NFIB	nuclear factor I/B	4.7	4.65	0.7	10	0.039
ENSG00000114648	KLHL18	kelch-like family member 18	4.1	4.64	0.4	9	0.0392
ENSG00000105679	GAPDHS	glyceraldehyde-3-phosphate dehydrogenase, spermatogenic	2.4	4.64	0.2	6.6	0.0392
ENSG00000153885	KCTD15	potassium channel tetramerization domain containing 15	2	4.64	0.2	5.7	0.0392
ENSG00000223547	ZNF844	zinc finger protein 844	3	4.64	0.5	8	0.0392
ENSG00000132972	RNF17	ring finger protein 17	-2.1	4.63	-6	0.4	0.0394
ENSG00000158560	DYNC1I1	dynein, cytoplasmic 1, intermediate chain 1	-2	4.63	-5.9	-0.1	0.0394
ENSG00000125995	ROMO1	reactive oxygen species modulator 1	2.4	4.63	-0.1	6	0.0394
ENSG00000106125	FAM188B	family with sequence similarity 188, member B	-1.8	4.63	-5	1.1	0.0394
ENSG00000166741	NNMT	nicotinamide N-methyltransferase	1.8	4.63	0.1	5.4	0.0394
ENSG00000169062	UPF3A	UPF3 regulator of nonsense transcripts homolog A (yeast)	2.4	4.63	0	6	0.0394
ENSG00000204348	DXO	decapping exoribonuclease	2.1	4.63	0.2	5.9	0.0394
ENSG00000196345	ZKSCAN7	zinc finger with KRAB and SCAN domains 7	-2.4	4.62	-7	5.2	0.0396
ENSG00000138587	MNS1	meiosis-specific nuclear structural 1	2.5	4.62	0.1	7.5	0.0396
ENSG00000217455	AC091801.1	N/A	2.8	4.62	0.4	6	0.0396
ENSG00000173156	RHOD	ras homolog family member D	2.7	4.62	-1.7	6	0.0396
ENSG00000141867	BRD4	bromodomain containing 4	3	4.61	0.5	7.7	0.0398
ENSG00000070087	PFN2	profilin 2	1.9	4.61	0.1	4.9	0.0398
ENSG00000169155	ZBTB43	zinc finger and BTB domain containing 43	-2.5	4.61	-7	1.3	0.0398
ENSG00000251039	IGKV2D-40	immunoglobulin kappa variable 2D-40	-2	4.61	-6	1.3	0.0398
ENSG00000196337	CGB7	chorionic gonadotropin, beta polypeptide 7	2.1	4.61	0	6.4	0.0398
ENSG00000115216	NRBP1	nuclear receptor binding protein 1	3.4	4.6	0.3	8	0.04
ENSG00000088986	DYNLL1	dynein, light chain, LC8-type 1	3.6	4.6	0.3	9	0.04
ENSG00000122585	NPY	neuropeptide Y	-2	4.6	-6	1.7	0.04
ENSG00000118246	FASTKD2	FAST kinase domains 2	2.9	4.59	0.4	7.5	0.0402
ENSG00000158793	NIT1	nitrilase 1	3.6	4.59	0.4	9.9	0.0402
ENSG00000119599	DCAF4	DDB1 and CUL4 associated factor 4	3.8	4.59	-0.4	8	0.0402
ENSG00000221946	FXYD7	FXYD domain containing ion transport regulator 7	1.8	4.59	0.2	5	0.0402
ENSG00000226124	FTCDNL1	formiminotransferase cyclodeaminase N-terminal like	-1.8	4.58	-6.2	-0.1	0.0404
ENSG00000126860	EVI2A	ecotropic viral integration site 2A	-2.2	4.58	-6.4	-0.2	0.0404
ENSG00000180767	CHST13	carbohydrate (chondroitin 4) sulfotransferase 13	3.4	4.58	-0.5	9	0.0404
ENSG00000183709	IFNL2	interferon, lambda 2	3.7	4.58	0.5	9.5	0.0404
ENSG00000083223	ZCCHC6	zinc finger, CCHC domain containing 6	2.3	4.58	0.1	6.7	0.0404
ENSG00000099998	GGT5	gamma-glutamyltransferase 5	-2.1	4.57	-6	3.8	0.0406
ENSG00000183508	FAM46C	family with sequence similarity 46, member C	2.2	4.57	0.3	6.4	0.0406
ENSG00000164100	NDST3	N-deacetylase/N-sulfotransferase (heparan glucosaminyl) 3	-2.4	4.57	-7	1.8	0.0406
ENSG00000100053	CRYBB3	crystallin, beta B3	1.8	4.57	0.2	6.8	0.0406
ENSG00000213921	LEUTX	leucine twenty homeobox	2.3	4.56	0.2	6.6	0.0408
ENSG00000139914	FITM1	fat storage-inducing transmembrane protein 1	1.9	4.56	0.2	5.8	0.0408
ENSG00000167077	MEI1	meiosis inhibitor 1	-1.7	4.56	-5.3	0.1	0.0408
ENSG00000114544	SLC41A3	solute carrier family 41, member 3	2	4.56	0.3	8.3	0.0408
ENSG00000181409	AATK	apoptosis-associated tyrosine kinase	2.7	4.56	-3.6	6	0.0408
ENSG00000197748	WDR96	N/A	2.8	4.56	0.4	6.3	0.0408
ENSG00000146576	C7ORF26	chromosome 7 open reading frame 26	-1.9	4.56	-6	0.3	0.0408
ENSG00000120332	TNN	tenascin N	3.3	4.56	-2.8	7	0.0408
ENSG00000119655	NPC2	Niemann-Pick disease, type C2	1.9	4.55	0.3	5.4	0.041
ENSG00000040633	PHF23	PHD finger protein 23	1.6	4.55	0.3	3.6	0.041
ENSG00000127540	UQCR11	ubiquinol-cytochrome c reductase, complex III subunit XI	-1.8	4.55	-4.5	-0.3	0.041
ENSG00000100302	RASD2	RASD family, member 2	2.4	4.55	0.2	7	0.041
ENSG00000171793	CTPS1	CTP synthase 1	2.1	4.54	0.1	5.5	0.0413
ENSG00000177464	GPR4	G protein-coupled receptor 4	2	4.54	0.2	5.9	0.0413
ENSG00000174306	ZHX3	zinc fingers and homeoboxes 3	-1.5	4.54	-5	0.2	0.0413
ENSG00000213077	FAM106A	family with sequence similarity 106, member A	-1.7	4.54	-6	0.9	0.0413
ENSG00000136709	WDR33	WD repeat domain 33	-2.4	4.54	-6	0.6	0.0413
ENSG00000196196	HRCT1	histidine rich carboxyl terminus 1	-2.3	4.54	-6	2.2	0.0413
ENSG00000137818	RPLP1	ribosomal protein, large, P1	2.8	4.54	0.5	7.9	0.0413
ENSG00000187605	TET3	tet methylcytosine dioxygenase 3	2.6	4.54	0.3	6.9	0.0413
ENSG00000155846	PPARGC1B	peroxisome proliferator-activated receptor gamma, coactivator 1 beta	3.7	4.54	0.5	9.2	0.0413
ENSG00000125520	SLC2A4RG	SLC2A4 regulator	2.7	4.54	0.1	7.9	0.0413
ENSG00000058673	ZC3H11A	zinc finger CCCH-type containing 11A	-1.9	4.54	-5.9	-0.1	0.0413
ENSG00000183038	GGTLC3	gamma-glutamyltransferase light chain 3	3.5	4.53	0.4	8.9	0.0415
ENSG00000145975	FAM217A	family with sequence similarity 217, member A	3.3	4.53	0.3	8.8	0.0415
ENSG00000166478	ZNF143	zinc finger protein 143	2.5	4.53	-0.6	7	0.0415
ENSG00000198682	PAPSS2	3'-phosphoadenosine 5'-phosphosulfate synthase 2	2.4	4.53	0.2	5.9	0.0415
ENSG00000172869	DMXL1	Dmx-like 1	4.8	4.53	1	10	0.0415
ENSG00000168488	ATXN2L	ataxin 2-like	2.1	4.53	-0.3	6	0.0415
ENSG00000174448	STARD6	StAR-related lipid transfer (START) domain containing 6	-2.2	4.53	-6.7	0	0.0415
ENSG00000168010	ATG16L2	autophagy related 16-like 2 (S. cerevisiae)	2.3	4.52	-1	6	0.0417
ENSG00000135070	ISCA1	iron-sulfur cluster assembly 1	1.6	4.52	0.1	4.9	0.0417
ENSG00000189043	NDUFA4	NADH dehydrogenase (ubiquinone) 1 alpha subcomplex, 4, 9kDa	3.8	4.52	-2.5	9	0.0417
ENSG00000269396	AC187652.1	N/A	2.9	4.52	0.4	6.7	0.0417
ENSG00000221887	HMSD	histocompatibility (minor) serpin domain containing	3.3	4.52	0.4	8	0.0417
ENSG00000179922	ZNF784	zinc finger protein 784	2.1	4.52	0.1	6.6	0.0417
ENSG00000144015	TRIM43	tripartite motif containing 43	-1.8	4.51	-6	0.4	0.0419
ENSG00000257411	RP11-603J24.9	N/A	4.7	4.51	0.9	10	0.0419
ENSG00000183281	PLGLB1	plasminogen-like B1	-2.7	4.51	-6	-1	0.0419
ENSG00000143119	CD53	CD53 molecule	-2.4	4.51	-7	1.5	0.0419
ENSG00000092531	SNAP23	synaptosomal-associated protein, 23kDa	3	4.5	0.6	6.9	0.0421
ENSG00000185028	LRRC14B	leucine rich repeat containing 14B	4.4	4.5	-2.6	10	0.0421
ENSG00000101126	ADNP	activity-dependent neuroprotector homeobox	-2.5	4.49	-7	5.6	0.0423
ENSG00000241945	PWP2	PWP2 periodic tryptophan protein homolog (yeast)	4.1	4.49	-0.2	9	0.0423
ENSG00000198925	ATG9A	autophagy related 9A	3.7	4.49	0.6	8	0.0423
ENSG00000140992	PDPK1	3-phosphoinositide dependent protein kinase 1	5.1	4.49	0.7	10	0.0423
ENSG00000124602	UNC5CL	unc-5 homolog C (C. elegans)-like	5.5	4.49	-0.7	11	0.0423
ENSG00000067208	EVI5	ecotropic viral integration site 5	-1.7	4.48	-5	0.1	0.0426
ENSG00000155629	PIK3AP1	phosphoinositide-3-kinase adaptor protein 1	3.1	4.48	0.4	8	0.0426
ENSG00000211651	IGLV1-44	immunoglobulin lambda variable 1-44	3.6	4.48	0	8	0.0426
ENSG00000180530	NRIP1	nuclear receptor interacting protein 1	-1.6	4.48	-4.9	0.1	0.0426
ENSG00000188295	ZNF669	zinc finger protein 669	1.9	4.48	0.2	5.6	0.0426
ENSG00000100167	2018-09-03	septin 3	3.2	4.48	-2.7	7	0.0426
ENSG00000224916	APOC4-APOC2	APOC4-APOC2 readthrough (NMD candidate)	2.1	4.47	0.3	7.8	0.0428
ENSG00000113761	ZNF346	zinc finger protein 346	3	4.47	0.2	8.9	0.0428
ENSG00000171604	CXXC5	CXXC finger protein 5	1.9	4.46	-0.2	6	0.043
ENSG00000167414	GNG8	guanine nucleotide binding protein (G protein), gamma 8	2.2	4.45	-0.6	7	0.0432
ENSG00000188033	ZNF490	zinc finger protein 490	-2.2	4.45	-6	0.5	0.0432
ENSG00000151778	SERP2	stress-associated endoplasmic reticulum protein family member 2	4.5	4.45	0.4	10	0.0432
ENSG00000184140	OR4F6	olfactory receptor, family 4, subfamily F, member 6	2.9	4.44	-0.2	8	0.0435
ENSG00000182334	OR5P3	olfactory receptor, family 5, subfamily P, member 3	3.5	4.43	-0.6	8	0.0437
ENSG00000179751	SYCN	syncollin	2.2	4.43	0	6.6	0.0437
ENSG00000185115	NDNL2	necdin-like 2	-1.8	4.43	-6	-0.1	0.0437
ENSG00000109079	TNFAIP1	tumor necrosis factor, alpha-induced protein 1 (endothelial)	3.2	4.43	-0.8	9	0.0437
ENSG00000154734	ADAMTS1	ADAM metallopeptidase with thrombospondin type 1 motif, 1	3.2	4.43	-2.7	8	0.0437
ENSG00000183463	URAD	ureidoimidazoline (2-oxo-4-hydroxy-4-carboxy-5-) decarboxylase	-2.5	4.43	-7	-0.3	0.0437
ENSG00000143256	PFDN2	prefoldin subunit 2	5	4.42	-2	10	0.0439
ENSG00000135222	CSN2	casein beta	2.3	4.42	-1.2	6	0.0439
ENSG00000142515	KLK3	kallikrein-related peptidase 3	-2.8	4.42	-8	-0.2	0.0439
ENSG00000076662	ICAM3	intercellular adhesion molecule 3	3	4.42	-0.4	7	0.0439
ENSG00000105325	FZR1	fizzy/cell division cycle 20 related 1 (Drosophila)	1.9	4.42	0.2	4.3	0.0439
ENSG00000186212	SOWAHB	sosondowah ankyrin repeat domain family member B	2.6	4.41	0.1	7.7	0.0442
ENSG00000057704	TMCC3	transmembrane and coiled-coil domain family 3	2.3	4.41	-0.4	7.6	0.0442
ENSG00000105270	CLIP3	CAP-GLY domain containing linker protein 3	2.4	4.41	0.1	5.8	0.0442
ENSG00000162604	TM2D1	TM2 domain containing 1	2.1	4.41	0.1	5.5	0.0442
ENSG00000147536	GINS4	GINS complex subunit 4 (Sld5 homolog)	2.2	4.41	0.2	6.6	0.0442
ENSG00000092931	MFSD11	major facilitator superfamily domain containing 11	1.8	4.41	0.1	5	0.0442
ENSG00000172428	MYEOV2	myeloma overexpressed 2	2.5	4.41	-0.7	8	0.0442
ENSG00000211652	IGLV7-43	immunoglobulin lambda variable 7-43	3.4	4.4	-1.1	9	0.0444
ENSG00000105011	ASF1B	anti-silencing function 1B histone chaperone	-3.1	4.4	-8	-0.7	0.0444
ENSG00000189079	ARID2	AT rich interactive domain 2 (ARID, RFX-like)	1.6	4.4	0.1	4.7	0.0444
ENSG00000124232	RBPJL	recombination signal binding protein for immunoglobulin kappa J region-like	1.9	4.39	0.2	6	0.0446
ENSG00000197324	LRP10	low density lipoprotein receptor-related protein 10	2.6	4.39	-0.9	8	0.0446
ENSG00000204306	AP002348.1	N/A	1.8	4.38	0.1	5.4	0.0448
ENSG00000099797	TECR	trans-2,3-enoyl-CoA reductase	1.8	4.38	0.1	4.9	0.0448
ENSG00000165215	CLDN3	claudin 3	-2	4.38	-7	2.4	0.0448
ENSG00000148204	CRB2	crumbs family member 2	-1.7	4.38	-7	0.2	0.0448
ENSG00000148136	OR13C4	olfactory receptor, family 13, subfamily C, member 4	-2	4.38	-6	0	0.0448
ENSG00000104332	SFRP1	secreted frizzled-related protein 1	2.3	4.38	-1.8	7	0.0448
ENSG00000160813	PPP1R35	protein phosphatase 1, regulatory subunit 35	2.2	4.38	0.1	6.7	0.0448
ENSG00000122482	ZNF644	zinc finger protein 644	2.3	4.38	0.2	5.1	0.0448
ENSG00000204387	C6ORF48	chromosome 6 open reading frame 48	2.8	4.38	-0.5	8	0.0448
ENSG00000132535	DLG4	discs, large homolog 4 (Drosophila)	-2	4.37	-6	0.7	0.0451
ENSG00000181541	MAB21L2	mab-21-like 2 (C. elegans)	-2.1	4.37	-5.8	-0.1	0.0451
ENSG00000181074	OR52N4	olfactory receptor, family 52, subfamily N, member 4	-1.9	4.36	-5	1.4	0.0453
ENSG00000119729	RHOQ	ras homolog family member Q	5.5	4.36	1.7	11	0.0453
ENSG00000144048	DUSP11	dual specificity phosphatase 11 (RNA/RNP complex 1-interacting)	-1.8	4.36	-5.8	0.8	0.0453
ENSG00000166037	CEP57	centrosomal protein 57kDa	4.7	4.36	0.3	10	0.0453
ENSG00000102178	UBL4A	ubiquitin-like 4A	2.1	4.35	0.1	5.8	0.0456
ENSG00000140521	POLG	polymerase (DNA directed), gamma	4.9	4.35	0.7	10	0.0456
ENSG00000176102	CSTF3	cleavage stimulation factor, 3' pre-RNA, subunit 3, 77kDa	-2	4.35	-6	1.3	0.0456
ENSG00000177951	BET1L	Bet1 golgi vesicular membrane trafficking protein-like	3.4	4.35	0.7	8.8	0.0456
ENSG00000186815	TPCN1	two pore segment channel 1	1.8	4.34	0.1	5.8	0.0458
ENSG00000168906	MAT2A	methionine adenosyltransferase II, alpha	4.5	4.34	-1.5	9	0.0458
ENSG00000169509	CRCT1	cysteine-rich C-terminal 1	3	4.34	0.6	7.9	0.0458
ENSG00000156009	MAGEA8	melanoma antigen family A, 8	-2.2	4.34	-6.9	-0.1	0.0458
ENSG00000130829	DUSP9	dual specificity phosphatase 9	4.3	4.34	0.6	9.9	0.0458
ENSG00000164082	GRM2	glutamate receptor, metabotropic 2	3.2	4.34	0.4	8.7	0.0458
ENSG00000164651	SP8	Sp8 transcription factor	5	4.33	0.6	10	0.046
ENSG00000205328	OR6C65	olfactory receptor, family 6, subfamily C, member 65	-1.7	4.33	-5.4	0	0.046
ENSG00000161133	USP41	ubiquitin specific peptidase 41	-1.5	4.33	-5	0.2	0.046
ENSG00000106070	GRB10	growth factor receptor-bound protein 10	1.8	4.33	0.1	7.4	0.046
ENSG00000197816	CCDC180	coiled-coil domain containing 180	-1.9	4.32	-5.6	-0.1	0.0463
ENSG00000021300	PLEKHB1	pleckstrin homology domain containing, family B (evectins) member 1	-1.9	4.32	-6.7	0.2	0.0463
ENSG00000254772	EEF1G	eukaryotic translation elongation factor 1 gamma	4.2	4.32	0.9	9	0.0463
ENSG00000141404	GNAL	guanine nucleotide binding protein (G protein), alpha activating activity polypeptide, olfactory type	1.8	4.31	-0.1	4.9	0.0465
ENSG00000187147	RNF220	ring finger protein 220	3.4	4.31	0.3	8	0.0465
ENSG00000125571	IL37	interleukin 37	-1.8	4.31	-6.3	0	0.0465
ENSG00000241598	KRTAP5-4	keratin associated protein 5-4	5.3	4.31	1.4	11	0.0465
ENSG00000141985	SH3GL1	SH3-domain GRB2-like 1	-3.3	4.31	-7	-0.9	0.0465
ENSG00000156219	ART3	ADP-ribosyltransferase 3	-1.7	4.3	-4.7	-0.1	0.0467
ENSG00000179038	AP001885.1	N/A	-2.3	4.3	-7	-0.1	0.0467
ENSG00000143376	SNX27	sorting nexin family member 27	1.4	4.3	0.1	4.1	0.0467
ENSG00000189325	C6ORF222	chromosome 6 open reading frame 222	1.8	4.3	-0.1	4.9	0.0467
ENSG00000110911	SLC11A2	solute carrier family 11 (proton-coupled divalent metal ion transporter), member 2	-1.5	4.3	-5	1.5	0.0467
ENSG00000108561	C1QBP	complement component 1, q subcomponent binding protein	2.1	4.3	-1	5	0.0467
ENSG00000172716	SLFN11	schlafen family member 11	-2.5	4.3	-7	4.2	0.0467
ENSG00000186318	BACE1	beta-site APP-cleaving enzyme 1	1.9	4.3	0	5.7	0.0467
ENSG00000166887	VPS39	vacuolar protein sorting 39 homolog (S. cerevisiae)	2.1	4.3	0.2	6.6	0.0467
ENSG00000150681	RGS18	regulator of G-protein signaling 18	1.8	4.29	-0.1	5.7	0.047
ENSG00000146828	SLC12A9	solute carrier family 12, member 9	-2.5	4.29	-7	-0.3	0.047
ENSG00000144357	UBR3	ubiquitin protein ligase E3 component n-recognin 3 (putative)	1.6	4.29	0.1	4.2	0.047
ENSG00000269514	DKFZP779L1853	uncharacterized LOC643162	1.8	4.29	0	5.6	0.047
ENSG00000130385	BMP15	bone morphogenetic protein 15	1.9	4.29	-0.5	5	0.047
ENSG00000171596	NMUR1	neuromedin U receptor 1	-2.8	4.29	-8	3.6	0.047
ENSG00000213903	LTB4R	leukotriene B4 receptor	-1.8	4.29	-5	-0.1	0.047
ENSG00000086967	MYBPC2	myosin binding protein C, fast type	2.7	4.28	0.4	6.9	0.0473
ENSG00000169047	IRS1	insulin receptor substrate 1	-3.1	4.28	-8	-0.3	0.0473
ENSG00000185101	ANO9	anoctamin 9	2.5	4.28	0.2	6.1	0.0473
ENSG00000176601	MAP3K19	mitogen-activated protein kinase kinase kinase 19	-1.5	4.28	-5	0.2	0.0473
ENSG00000147813	NAPRT1	N/A	2.4	4.28	0.2	6.8	0.0473
ENSG00000182329	AC079354.1	N/A	-2.2	4.28	-7	1.4	0.0473
ENSG00000241978	AKAP2	A kinase (PRKA) anchor protein 2	2.4	4.27	-0.1	7	0.0475
ENSG00000123933	MXD4	MAX dimerization protein 4	3.5	4.27	0.4	8.8	0.0475
ENSG00000105278	ZFR2	zinc finger RNA binding protein 2	1.9	4.27	0.1	5.5	0.0475
ENSG00000151116	UEVLD	UEV and lactate/malate dehyrogenase domains	3.4	4.27	0.5	8.8	0.0475
ENSG00000261272	MUC22	mucin 22	-2.2	4.27	-7	0.6	0.0475
ENSG00000166164	BRD7	bromodomain containing 7	4.8	4.26	0.9	9.7	0.0478
ENSG00000144724	PTPRG	protein tyrosine phosphatase, receptor type, G	3.2	4.26	-0.1	9	0.0478
ENSG00000157111	TMEM171	transmembrane protein 171	-1.8	4.26	-5	1.7	0.0478
ENSG00000018236	CNTN1	contactin 1	-2	4.26	-5.8	-0.1	0.0478
ENSG00000107719	PALD1	phosphatase domain containing, paladin 1	2	4.26	-0.2	6.4	0.0478
ENSG00000167985	SDHAF2	succinate dehydrogenase complex assembly factor 2	3.3	4.26	0.3	8	0.0478
ENSG00000162971	TYW5	tRNA-yW synthesizing protein 5	2.1	4.26	0	6.5	0.0478
ENSG00000172955	ADH6	alcohol dehydrogenase 6 (class V)	2.4	4.25	0.1	6.8	0.048
ENSG00000175535	PNLIP	pancreatic lipase	-1.4	4.25	-4.8	0.3	0.048
ENSG00000011677	GABRA3	gamma-aminobutyric acid (GABA) A receptor, alpha 3	1.7	4.25	-0.7	5.7	0.048
ENSG00000214556	C17ORF98	chromosome 17 open reading frame 98	-1.7	4.25	-4.9	-0.2	0.048
ENSG00000073849	ST6GAL1	ST6 beta-galactosamide alpha-2,6-sialyltranferase 1	-1.7	4.25	-4.9	-0.1	0.048
ENSG00000198964	SGMS1	sphingomyelin synthase 1	2.7	4.25	0.2	6.5	0.048
ENSG00000250745	USP17L20	ubiquitin specific peptidase 17-like family member 20	-2.1	4.25	-5.6	-0.4	0.048
ENSG00000198000	NOL8	nucleolar protein 8	5.1	4.24	0.2	11	0.0483
ENSG00000004777	ARHGAP33	Rho GTPase activating protein 33	1.5	4.24	0.1	4.2	0.0483
ENSG00000138035	PNPT1	polyribonucleotide nucleotidyltransferase 1	2.2	4.24	0.1	6.7	0.0483
ENSG00000171469	ZNF561	zinc finger protein 561	2.5	4.24	0.2	5.9	0.0483
ENSG00000137497	NUMA1	nuclear mitotic apparatus protein 1	2.6	4.24	0	6.7	0.0483
ENSG00000187867	PALM3	paralemmin 3	2	4.23	-0.5	6	0.0485
ENSG00000065308	TRAM2	translocation associated membrane protein 2	2.2	4.23	0.3	4.5	0.0485
ENSG00000173581	CCDC106	coiled-coil domain containing 106	2.3	4.23	0.2	6	0.0485
ENSG00000146963	C7ORF55-LUC7L2	C7orf55-LUC7L2 readthrough	2.6	4.22	0.1	6	0.0488
ENSG00000146066	HIGD2A	HIG1 hypoxia inducible domain family, member 2A	1.9	4.22	-0.8	5	0.0488
ENSG00000180305	WFDC10A	WAP four-disulfide core domain 10A	-2.3	4.22	-7	0.7	0.0488
ENSG00000167360	OR51Q1	olfactory receptor, family 51, subfamily Q, member 1	3.2	4.22	0.5	8	0.0488
ENSG00000099985	OSM	oncostatin M	4.6	4.22	-0.2	10	0.0488
ENSG00000187210	GCNT1	glucosaminyl (N-acetyl) transferase 1, core 2	5.2	4.21	0.6	11	0.049
ENSG00000133657	ATP13A3	ATPase type 13A3	-3.1	4.21	-8	-0.3	0.049
ENSG00000142513	ACPT	acid phosphatase, testicular	1.8	4.21	-1.1	8	0.049
ENSG00000104517	UBR5	ubiquitin protein ligase E3 component n-recognin 5	1.5	4.21	0.2	4.3	0.049
ENSG00000181961	OR4A16	olfactory receptor, family 4, subfamily A, member 16	-1.9	4.21	-6	1.1	0.049
ENSG00000186567	CEACAM19	carcinoembryonic antigen-related cell adhesion molecule 19	2.2	4.2	0.2	6.5	0.0493
ENSG00000241484	ARHGAP8	Rho GTPase activating protein 8	1.9	4.2	0.2	4.3	0.0493
ENSG00000108773	KAT2A	K(lysine) acetyltransferase 2A	2.1	4.2	0.1	5.8	0.0493
ENSG00000184330	S100A7A	S100 calcium binding protein A7A	-2.8	4.2	-7	0	0.0493
ENSG00000157322	CLEC18A	C-type lectin domain family 18, member A	1.7	4.19	0.1	4.9	0.0495
ENSG00000174720	LARP7	La ribonucleoprotein domain family, member 7	-2.4	4.19	-7	1.3	0.0495
ENSG00000189186	DCAF8L2	DDB1 and CUL4 associated factor 8-like 2	-1.8	4.19	-5.8	0.1	0.0495
ENSG00000143748	NVL	nuclear VCP-like	4.4	4.19	-1.2	9	0.0495
ENSG00000151779	NBAS	neuroblastoma amplified sequence	-1.9	4.19	-6.4	-0.1	0.0495
ENSG00000130538	OR11H1	olfactory receptor, family 11, subfamily H, member 1	-2.2	4.19	-5	-0.7	0.0495
ENSG00000163281	GNPDA2	glucosamine-6-phosphate deaminase 2	2.2	4.17	-0.8	5	0.0501
ENSG00000198169	ZNF251	zinc finger protein 251	3.2	4.17	-0.1	7	0.0501
ENSG00000183470	AC009365.3	N/A	3.3	4.17	-0.3	8	0.0501
ENSG00000054267	ARID4B	AT rich interactive domain 4B (RBP1-like)	-1.9	4.16	-5	0.6	0.0504
ENSG00000139304	PTPRQ	protein tyrosine phosphatase, receptor type, Q	2.6	4.16	-2.2	7	0.0504
ENSG00000163808	KIF15	kinesin family member 15	-2.8	4.16	-8	2.3	0.0504
ENSG00000160886	LY6K	lymphocyte antigen 6 complex, locus K	1.9	4.16	-1.2	6	0.0504
ENSG00000157020	SEC13	SEC13 homolog (S. cerevisiae)	2.5	4.16	-0.1	7	0.0504
ENSG00000086827	ZW10	zw10 kinetochore protein	2	4.16	-0.8	6	0.0504
ENSG00000171425	ZNF581	zinc finger protein 581	1.7	4.15	-0.3	5	0.0506
ENSG00000187862	TTC24	tetratricopeptide repeat domain 24	5.2	4.15	-2.5	11	0.0506
ENSG00000177476	OR2G3	olfactory receptor, family 2, subfamily G, member 3	-2	4.15	-6	2.6	0.0506
ENSG00000184708	EIF4ENIF1	eukaryotic translation initiation factor 4E nuclear import factor 1	-2	4.15	-5	3.1	0.0506
ENSG00000250210	RP11-585F1.10	N/A	3.6	4.15	1.2	7	0.0506
ENSG00000135624	CCT7	chaperonin containing TCP1, subunit 7 (eta)	4.7	4.15	-3.3	10	0.0506
ENSG00000101346	POFUT1	protein O-fucosyltransferase 1	-2.3	4.15	-6	3.8	0.0506
ENSG00000125447	GGA3	golgi-associated, gamma adaptin ear containing, ARF binding protein 3	-1.8	4.14	-5	0.1	0.0509
ENSG00000091164	TXNL1	thioredoxin-like 1	-1.7	4.14	-5	1.7	0.0509
ENSG00000169692	AGPAT2	1-acylglycerol-3-phosphate O-acyltransferase 2	2.7	4.14	-2.2	8	0.0509
ENSG00000182473	EXOC7	exocyst complex component 7	-1.4	4.14	-4	0.5	0.0509
ENSG00000141458	NPC1	Niemann-Pick disease, type C1	2.5	4.13	-0.2	7.9	0.0512
ENSG00000127920	GNG11	guanine nucleotide binding protein (G protein), gamma 11	4.6	4.13	0.6	9	0.0512
ENSG00000105392	CRX	cone-rod homeobox	2.3	4.13	0.5	6.5	0.0512
ENSG00000135905	DOCK10	dedicator of cytokinesis 10	-2	4.13	-5.5	6.4	0.0512
ENSG00000185448	FAM47A	family with sequence similarity 47, member A	3.5	4.13	-0.2	8	0.0512
ENSG00000152804	HHEX	hematopoietically expressed homeobox	2.6	4.12	-1	8	0.0515
ENSG00000153391	INO80C	INO80 complex subunit C	4.7	4.12	0.5	10	0.0515
ENSG00000104964	AES	amino-terminal enhancer of split	-2.7	4.12	-8	-0.1	0.0515
ENSG00000197933	ZNF823	zinc finger protein 823	2.2	4.12	-2.2	6.9	0.0515
ENSG00000186871	ERCC6L	excision repair cross-complementation group 6-like	2.4	4.12	0.1	6.7	0.0515
ENSG00000108961	RANGRF	RAN guanine nucleotide release factor	2	4.12	-1.2	8	0.0515
ENSG00000269494	AL359693.1	N/A	-1.9	4.11	-4	-0.6	0.0517
ENSG00000250424	AQP1	aquaporin 1 (Colton blood group)	-1.9	4.11	-6.8	0.4	0.0517
ENSG00000140795	MYLK3	myosin light chain kinase 3	-1.7	4.11	-5.9	0.3	0.0517
ENSG00000169139	UBE2V2	ubiquitin-conjugating enzyme E2 variant 2	-2.4	4.11	-7	5.7	0.0517
ENSG00000211952	IGHV4-28	immunoglobulin heavy variable 4-28	2.4	4.11	0.2	6.5	0.0517
ENSG00000007168	PAFAH1B1	platelet-activating factor acetylhydrolase 1b, regulatory subunit 1 (45kDa)	-2.2	4.11	-6	4.9	0.0517
ENSG00000241356	OR5G3	olfactory receptor, family 5, subfamily G, member 3 (gene/pseudogene)	-2.1	4.11	-6	2.2	0.0517
ENSG00000197766	CFD	complement factor D (adipsin)	3.4	4.1	0.6	9	0.052
ENSG00000119673	ACOT2	acyl-CoA thioesterase 2	2	4.1	0	8	0.052
ENSG00000172340	SUCLG2	succinate-CoA ligase, GDP-forming, beta subunit	-1.8	4.1	-5.9	0.5	0.052
ENSG00000184857	TMEM186	transmembrane protein 186	2	4.1	0.2	5.2	0.052
ENSG00000153563	CD8A	CD8a molecule	2.2	4.1	-0.2	5	0.052
ENSG00000186834	HEXIM1	hexamethylene bis-acetamide inducible 1	2.5	4.1	0.2	7	0.052
ENSG00000156599	ZDHHC5	zinc finger, DHHC-type containing 5	-1.8	4.1	-5	0.1	0.052
ENSG00000267335	CTB-60B18.6	N/A	3.9	4.1	0.4	9	0.052
ENSG00000256087	ZNF432	zinc finger protein 432	2	4.09	0.1	4.8	0.0523
ENSG00000142528	ZNF473	zinc finger protein 473	2	4.09	0.1	7.6	0.0523
ENSG00000123643	SLC36A1	solute carrier family 36 (proton/amino acid symporter), member 1	1.7	4.08	-0.5	5.8	0.0525
ENSG00000179046	TRIML2	tripartite motif family-like 2	2.1	4.08	-0.1	6.6	0.0525
ENSG00000265118	CTD-2370N5.3	N/A	-2.2	4.08	-5.8	-0.5	0.0525
ENSG00000105825	TFPI2	tissue factor pathway inhibitor 2	-1.8	4.08	-5.7	0.4	0.0525
ENSG00000064225	ST3GAL6	ST3 beta-galactoside alpha-2,3-sialyltransferase 6	2	4.08	0	8.9	0.0525
ENSG00000161055	SCGB3A1	secretoglobin, family 3A, member 1	3	4.08	-0.5	8	0.0525
ENSG00000179134	SAMD4B	sterile alpha motif domain containing 4B	4.9	4.08	-1.2	10	0.0525
ENSG00000104980	TIMM44	translocase of inner mitochondrial membrane 44 homolog (yeast)	-1.9	4.07	-6	1.7	0.0528
ENSG00000136830	FAM129B	family with sequence similarity 129, member B	2.4	4.07	0.1	6.5	0.0528
ENSG00000269858	EGLN2	egl-9 family hypoxia-inducible factor 2	1.6	4.07	0.1	4.8	0.0528
ENSG00000111981	ULBP1	UL16 binding protein 1	1.6	4.07	0	4.8	0.0528
ENSG00000180815	MAP3K15	mitogen-activated protein kinase kinase kinase 15	3.1	4.07	0.2	9	0.0528
ENSG00000135318	NT5E	5'-nucleotidase, ecto (CD73)	-2.2	4.06	-7	6.8	0.0531
ENSG00000038210	PI4K2B	phosphatidylinositol 4-kinase type 2 beta	-1.9	4.06	-6	1.4	0.0531
ENSG00000158856	DMTN	dematin actin binding protein	3.3	4.06	0.1	9	0.0531
ENSG00000263002	ZNF234	zinc finger protein 234	2.4	4.06	-0.4	7	0.0531
ENSG00000143869	GDF7	growth differentiation factor 7	2.5	4.06	0	7.8	0.0531
ENSG00000144741	SLC25A26	solute carrier family 25 (S-adenosylmethionine carrier), member 26	-3.1	4.06	-7.9	-0.7	0.0531
ENSG00000186334	SLC36A3	solute carrier family 36, member 3	-2.1	4.05	-7	-0.2	0.0534
ENSG00000188026	RILPL1	Rab interacting lysosomal protein-like 1	5	4.05	0.8	10	0.0534
ENSG00000189152	GRAPL	GRB2-related adaptor protein-like	-2.6	4.05	-7	2	0.0534
ENSG00000134516	DOCK2	dedicator of cytokinesis 2	1.9	4.05	-0.1	5.7	0.0534
ENSG00000169208	OR10G3	olfactory receptor, family 10, subfamily G, member 3	-2	4.05	-7	0.3	0.0534
ENSG00000080854	IGSF9B	immunoglobulin superfamily, member 9B	1.7	4.05	-1.5	5	0.0534
ENSG00000187997	C17ORF99	chromosome 17 open reading frame 99	1.8	4.05	-0.4	5.9	0.0534
ENSG00000106038	EVX1	even-skipped homeobox 1	2.6	4.05	0	8	0.0534
ENSG00000108264	TADA2A	transcriptional adaptor 2A	-2	4.05	-7	2.7	0.0534
ENSG00000125611	CHCHD5	coiled-coil-helix-coiled-coil-helix domain containing 5	2.1	4.04	-1.6	7	0.0536
ENSG00000119778	ATAD2B	ATPase family, AAA domain containing 2B	2.3	4.04	-0.3	6.9	0.0536
ENSG00000129993	CBFA2T3	core-binding factor, runt domain, alpha subunit 2; translocated to, 3	-1.9	4.04	-5.5	0	0.0536
ENSG00000100359	SGSM3	small G protein signaling modulator 3	-2.8	4.04	-8	0	0.0536
ENSG00000182634	OR10G7	olfactory receptor, family 10, subfamily G, member 7	1.4	4.04	-0.3	4.7	0.0536
ENSG00000129566	TEP1	telomerase-associated protein 1	2.2	4.04	0	6.7	0.0536
ENSG00000206538	VGLL3	vestigial-like family member 3	2.4	4.04	-0.5	7	0.0536
ENSG00000240849	TMEM189	transmembrane protein 189	1.6	4.03	-0.3	4.8	0.0539
ENSG00000063180	CA11	carbonic anhydrase XI	1.5	4.03	0.1	4.2	0.0539
ENSG00000168237	GLYCTK	glycerate kinase	2.2	4.03	-3.7	6.9	0.0539
ENSG00000188157	AGRN	agrin	2.8	4.03	-2.3	8	0.0539
ENSG00000165807	PPP1R36	protein phosphatase 1, regulatory subunit 36	2	4.03	-0.6	5	0.0539
ENSG00000104723	TUSC3	tumor suppressor candidate 3	1.7	4.03	-0.6	5.9	0.0539
ENSG00000136327	NKX2-8	NK2 homeobox 8	4.4	4.03	0.9	10	0.0539
ENSG00000089101	C20ORF26	chromosome 20 open reading frame 26	-2.7	4.03	-8	0	0.0539
ENSG00000138119	MYOF	myoferlin	3.1	4.02	-1.7	7	0.0542
ENSG00000171224	C10ORF35	chromosome 10 open reading frame 35	2.3	4.02	0	6.7	0.0542
ENSG00000157077	ZFYVE9	zinc finger, FYVE domain containing 9	-1.5	4.02	-5	1.3	0.0542
ENSG00000145050	MANF	mesencephalic astrocyte-derived neurotrophic factor	-2.2	4.02	-5.5	-0.3	0.0542
ENSG00000170374	SP7	Sp7 transcription factor	-1.4	4.01	-5	4.7	0.0545
ENSG00000198752	CDC42BPB	CDC42 binding protein kinase beta (DMPK-like)	-1.8	4.01	-4.8	-0.1	0.0545
ENSG00000172818	OVOL1	ovo-like zinc finger 1	-1.7	4.01	-5	1.2	0.0545
ENSG00000203667	COX20	COX20 cytochrome C oxidase assembly factor	2	4.01	-0.8	5	0.0545
ENSG00000162607	USP1	ubiquitin specific peptidase 1	3.1	4.01	0.3	8.6	0.0545
ENSG00000106976	DNM1	dynamin 1	-1.9	4.01	-6	0.6	0.0545
ENSG00000095627	TDRD1	tudor domain containing 1	4.6	4	0.5	10	0.0548
ENSG00000168256	NKIRAS2	NFKB inhibitor interacting Ras-like 2	4.9	4	0.3	10	0.0548
ENSG00000110063	DCPS	decapping enzyme, scavenger	3.2	4	-2.5	8	0.0548
ENSG00000121005	CRISPLD1	cysteine-rich secretory protein LCCL domain containing 1	1.9	4	0.1	7.6	0.0548
ENSG00000102760	RGCC	regulator of cell cycle	2.5	4	0.3	6.7	0.0548
ENSG00000168214	RBPJ	recombination signal binding protein for immunoglobulin kappa J region	-1.9	4	-7	0.3	0.0548
ENSG00000176022	B3GALT6	UDP-Gal:betaGal beta 1,3-galactosyltransferase polypeptide 6	1.3	4	-0.3	4.8	0.0548
ENSG00000007216	SLC13A2	solute carrier family 13 (sodium-dependent dicarboxylate transporter), member 2	-1.8	4	-5.9	0.5	0.0548
ENSG00000196296	ATP2A1	ATPase, Ca++ transporting, cardiac muscle, fast twitch 1	-1.8	3.99	-7	2	0.0551
ENSG00000179178	TMEM125	transmembrane protein 125	-1.6	3.99	-4.3	-0.1	0.0551
ENSG00000115762	PLEKHB2	pleckstrin homology domain containing, family B (evectins) member 2	-2.1	3.99	-6	2.1	0.0551
ENSG00000142546	NOSIP	nitric oxide synthase interacting protein	1.4	3.99	0.2	3.6	0.0551
ENSG00000130208	APOC1	apolipoprotein C-I	1.9	3.99	-0.2	6	0.0551
ENSG00000136935	GOLGA1	golgin A1	1.6	3.99	-0.1	5	0.0551
ENSG00000180869	C1ORF180	chromosome 1 open reading frame 180	1.9	3.98	0	5.5	0.0554
ENSG00000180535	BHLHA15	basic helix-loop-helix family, member a15	2.6	3.98	-2.2	7	0.0554
ENSG00000184445	KNTC1	kinetochore associated 1	-1.6	3.98	-6	2.3	0.0554
ENSG00000104936	DMPK	dystrophia myotonica-protein kinase	2.2	3.98	-1.1	6.9	0.0554
ENSG00000106113	CRHR2	corticotropin releasing hormone receptor 2	-1.5	3.98	-4.2	-0.1	0.0554
ENSG00000005189	AC004381.6	N/A	-1.4	3.98	-4.6	0.1	0.0554
ENSG00000156687	UNC5D	unc-5 homolog D (C. elegans)	-2.6	3.97	-7	0.4	0.0557
ENSG00000150593	PDCD4	programmed cell death 4 (neoplastic transformation inhibitor)	3.1	3.97	-0.3	7	0.0557
ENSG00000138029	HADHB	hydroxyacyl-CoA dehydrogenase/3-ketoacyl-CoA thiolase/enoyl-CoA hydratase (trifunctional protein), beta subunit	-1.8	3.97	-5.6	0.3	0.0557
ENSG00000175073	VCPIP1	valosin containing protein (p97)/p47 complex interacting protein 1	2.8	3.97	-0.2	8	0.0557
ENSG00000165312	OTUD1	OTU deubiquitinase 1	1.8	3.97	0	5.9	0.0557
ENSG00000130948	HSD17B3	hydroxysteroid (17-beta) dehydrogenase 3	2.3	3.97	-0.2	7	0.0557
ENSG00000101474	APMAP	adipocyte plasma membrane associated protein	-1.8	3.96	-6	2.3	0.056
ENSG00000162924	REL	v-rel avian reticuloendotheliosis viral oncogene homolog	-2.7	3.96	-8	1	0.056
ENSG00000176692	FOXC2	forkhead box C2 (MFH-1, mesenchyme forkhead 1)	2.2	3.96	0	9	0.056
ENSG00000092098	RNF31	ring finger protein 31	3.6	3.96	0	8	0.056
ENSG00000158477	CD1A	CD1a molecule	2.3	3.96	-0.1	6.7	0.056
ENSG00000102128	RAB40AL	RAB40A, member RAS oncogene family-like	-2	3.96	-6	0.6	0.056
ENSG00000128011	LRFN1	leucine rich repeat and fibronectin type III domain containing 1	1.3	3.95	0.1	4.1	0.0563
ENSG00000167619	TMEM145	transmembrane protein 145	1.4	3.95	0	5.8	0.0563
ENSG00000089280	FUS	FUS RNA binding protein	3.4	3.95	-1.8	9	0.0563
ENSG00000140937	CDH11	cadherin 11, type 2, OB-cadherin (osteoblast)	-2.2	3.95	-7	2.6	0.0563
ENSG00000076382	SPAG5	sperm associated antigen 5	-1.5	3.95	-5	1.2	0.0563
ENSG00000155096	AZIN1	antizyme inhibitor 1	1.4	3.94	0.1	5.8	0.0566
ENSG00000099250	NRP1	neuropilin 1	2	3.94	0.1	5.7	0.0566
ENSG00000175893	ZDHHC21	zinc finger, DHHC-type containing 21	-1.6	3.94	-5	3.4	0.0566
ENSG00000156876	SASS6	spindle assembly 6 homolog (C. elegans)	3.7	3.94	-1	8	0.0566
ENSG00000137259	HIST1H2AB	histone cluster 1, H2ab	-1.5	3.94	-4.5	0.3	0.0566
ENSG00000157036	EXOG	endo/exonuclease (5'-3'), endonuclease G-like	2	3.94	-1.7	6	0.0566
ENSG00000078177	N4BP2	NEDD4 binding protein 2	2.9	3.93	-0.2	8	0.0569
ENSG00000136877	FPGS	folylpolyglutamate synthase	4.1	3.93	0.5	9	0.0569
ENSG00000110888	CAPRIN2	caprin family member 2	-2.2	3.93	-7	0	0.0569
ENSG00000112592	TBP	TATA box binding protein	-1.6	3.93	-4.4	-0.1	0.0569
ENSG00000145354	CISD2	CDGSH iron sulfur domain 2	2	3.92	-2.3	6	0.0572
ENSG00000147535	PPAPDC1B	phosphatidic acid phosphatase type 2 domain containing 1B	-2.5	3.92	-7	3.8	0.0572
ENSG00000169375	SIN3A	SIN3 transcription regulator family member A	-1.7	3.92	-5	1.2	0.0572
ENSG00000185340	GAS2L1	growth arrest-specific 2 like 1	2	3.92	-0.2	5	0.0572
ENSG00000174744	BRMS1	breast cancer metastasis suppressor 1	-1.5	3.92	-5	2.4	0.0572
ENSG00000162819	BROX	BRO1 domain and CAAX motif containing	2.1	3.92	-1.9	6	0.0572
ENSG00000176547	OR4C3	olfactory receptor, family 4, subfamily C, member 3	-1.7	3.92	-5	0.6	0.0572
ENSG00000197889	MEIG1	meiosis/spermiogenesis associated 1	-2.3	3.92	-6	1.9	0.0572
ENSG00000159348	CYB5R1	cytochrome b5 reductase 1	-2	3.92	-6.8	-0.1	0.0572
ENSG00000217825	AC099552.4	N/A	-1.6	3.91	-3.9	-0.1	0.0575
ENSG00000159337	PLA2G4D	phospholipase A2, group IVD (cytosolic)	-2	3.91	-6	0.5	0.0575
ENSG00000171587	DSCAM	Down syndrome cell adhesion molecule	4.6	3.91	0.5	9.8	0.0575
ENSG00000155329	ZCCHC10	zinc finger, CCHC domain containing 10	2.7	3.91	-0.1	6	0.0575
ENSG00000108848	LUC7L3	LUC7-like 3 (S. cerevisiae)	3.5	3.91	-0.8	8	0.0575
ENSG00000183128	CALHM3	calcium homeostasis modulator 3	1.9	3.91	-1	8	0.0575
ENSG00000204542	C6ORF15	chromosome 6 open reading frame 15	1.8	3.91	0.1	7.3	0.0575
ENSG00000152558	TMEM123	transmembrane protein 123	-2.9	3.9	-8	1.2	0.0578
ENSG00000117322	CR2	complement component (3d/Epstein Barr virus) receptor 2	1.5	3.9	-2.6	5	0.0578
ENSG00000168275	COA6	cytochrome c oxidase assembly factor 6 homolog (S. cerevisiae)	1.7	3.9	-2	6	0.0578
ENSG00000169715	MT1E	metallothionein 1E	-1.6	3.9	-4	1.8	0.0578
ENSG00000147050	KDM6A	lysine (K)-specific demethylase 6A	-2.8	3.9	-7.8	-0.3	0.0578
ENSG00000138769	CDKL2	cyclin-dependent kinase-like 2 (CDC2-related kinase)	-1.6	3.9	-5.9	2.4	0.0578
ENSG00000198681	MAGEA1	melanoma antigen family A, 1 (directs expression of antigen MZ2-E)	-1.7	3.9	-5	0.6	0.0578
ENSG00000105186	ANKRD27	ankyrin repeat domain 27 (VPS9 domain)	2	3.9	0.3	7.8	0.0578
ENSG00000028277	POU2F2	POU class 2 homeobox 2	-2.8	3.9	-8	0.4	0.0578
ENSG00000127328	RAB3IP	RAB3A interacting protein	-2.2	3.89	-7	0	0.0581
ENSG00000169704	GP9	glycoprotein IX (platelet)	1.7	3.89	-1	6	0.0581
ENSG00000139354	GAS2L3	growth arrest-specific 2 like 3	-1.6	3.89	-5	1.1	0.0581
ENSG00000117682	DHDDS	dehydrodolichyl diphosphate synthase	3.1	3.89	0.5	7	0.0581
ENSG00000015568	RGPD5	RANBP2-like and GRIP domain containing 5	-1.8	3.89	-5.7	-0.1	0.0581
ENSG00000099992	TBC1D10A	TBC1 domain family, member 10A	4.6	3.89	0.5	9	0.0581
ENSG00000273269	RP11-761B3.1	N/A	-1.9	3.89	-5	5.9	0.0581
ENSG00000091128	LAMB4	laminin, beta 4	-2.3	3.88	-7	0.5	0.0584
ENSG00000139974	SLC38A6	solute carrier family 38, member 6	-1.6	3.88	-4	3.7	0.0584
ENSG00000204613	TRIM10	tripartite motif containing 10	4.4	3.88	0.4	9.5	0.0584
ENSG00000146469	VIP	vasoactive intestinal peptide	-2.9	3.87	-8	3.6	0.0587
ENSG00000089116	LHX5	LIM homeobox 5	-1.8	3.87	-6	1.2	0.0587
ENSG00000110274	CEP164	centrosomal protein 164kDa	2.4	3.87	-0.9	6	0.0587
ENSG00000076201	PTPN23	protein tyrosine phosphatase, non-receptor type 23	2.7	3.87	-0.5	8	0.0587
ENSG00000168000	BSCL2	Berardinelli-Seip congenital lipodystrophy 2 (seipin)	-1.8	3.87	-6	2.2	0.0587
ENSG00000119446	RBM18	RNA binding motif protein 18	-2	3.87	-6	0.8	0.0587
ENSG00000232112	TMA7	translation machinery associated 7 homolog (S. cerevisiae)	2.9	3.86	0.3	7.9	0.059
ENSG00000149635	OCSTAMP	osteoclast stimulatory transmembrane protein	2.3	3.86	0	5.9	0.059
ENSG00000106080	FKBP14	FK506 binding protein 14, 22 kDa	-1.7	3.86	-6	0.6	0.059
ENSG00000133794	ARNTL	aryl hydrocarbon receptor nuclear translocator-like	1.9	3.86	-1.6	6	0.059
ENSG00000099804	CDC34	cell division cycle 34	-1.9	3.85	-6	2.7	0.0593
ENSG00000112877	CEP72	centrosomal protein 72kDa	3.2	3.85	-0.7	7	0.0593
ENSG00000100439	ABHD4	abhydrolase domain containing 4	3.3	3.85	0.5	7	0.0593
ENSG00000136869	TLR4	toll-like receptor 4	4.7	3.85	0.9	10	0.0593
ENSG00000181027	FKRP	fukutin related protein	2	3.85	-0.4	5.9	0.0593
ENSG00000269343	ZNF587B	zinc finger protein 587B	2.4	3.85	0	7	0.0593
ENSG00000184302	SIX6	SIX homeobox 6	4.4	3.84	0.4	10	0.0596
ENSG00000132386	SERPINF1	serpin peptidase inhibitor, clade F (alpha-2 antiplasmin, pigment epithelium derived factor), member 1	-2.2	3.84	-7	1.1	0.0596
ENSG00000103495	MAZ	MYC-associated zinc finger protein (purine-binding transcription factor)	-1.7	3.84	-6	1.4	0.0596
ENSG00000156463	SH3RF2	SH3 domain containing ring finger 2	-2.3	3.84	-7	2.7	0.0596
ENSG00000089597	GANAB	glucosidase, alpha; neutral AB	1.5	3.84	0	3.9	0.0596
ENSG00000134853	PDGFRA	platelet-derived growth factor receptor, alpha polypeptide	3.3	3.84	-0.1	9	0.0596
ENSG00000080839	RBL1	retinoblastoma-like 1	-1.9	3.84	-5.8	-0.1	0.0596
ENSG00000182103	FAM181B	family with sequence similarity 181, member B	2.3	3.84	0.1	6.5	0.0596
ENSG00000133789	SWAP70	SWAP switching B-cell complex 70kDa subunit	1.9	3.83	-6.2	5	0.0599
ENSG00000115053	NCL	nucleolin	2.6	3.83	-1.3	8	0.0599
ENSG00000064703	DDX20	DEAD (Asp-Glu-Ala-Asp) box polypeptide 20	-2	3.83	-6	0.2	0.0599
ENSG00000168872	DDX19A	DEAD (Asp-Glu-Ala-Asp) box polypeptide 19A	2.2	3.83	-0.1	5.5	0.0599
ENSG00000120685	PROSER1	proline and serine rich 1	1.5	3.83	-0.1	6.5	0.0599
ENSG00000269446	AC006967.1	N/A	2.7	3.83	-2.1	8	0.0599
ENSG00000141012	GALNS	galactosamine (N-acetyl)-6-sulfatase	-2.2	3.83	-7	0.4	0.0599
ENSG00000159459	UBR1	ubiquitin protein ligase E3 component n-recognin 1	1.9	3.83	-3.3	6	0.0599
ENSG00000108947	EFNB3	ephrin-B3	1.5	3.83	-2.5	4	0.0599
ENSG00000179988	PSTK	phosphoseryl-tRNA kinase	2.5	3.82	0.3	6.9	0.0602
ENSG00000211820	TRAV41	T cell receptor alpha variable 41	2.7	3.82	-0.7	7	0.0602
ENSG00000117707	PROX1	prospero homeobox 1	1.6	3.82	-2.8	6	0.0602
ENSG00000077935	SMC1B	structural maintenance of chromosomes 1B	1.8	3.82	-1.1	5.8	0.0602
ENSG00000241553	ARPC4	actin related protein 2/3 complex, subunit 4, 20kDa	2.9	3.82	0.8	6	0.0602
ENSG00000243943	ZNF512	zinc finger protein 512	1.7	3.82	-0.3	5.7	0.0602
ENSG00000152580	IGSF10	immunoglobulin superfamily, member 10	2.3	3.82	-0.8	6.8	0.0602
ENSG00000158882	TOMM40L	translocase of outer mitochondrial membrane 40 homolog (yeast)-like	-2.1	3.82	-6	0.5	0.0602
ENSG00000185482	STAC3	SH3 and cysteine rich domain 3	-1.8	3.82	-5.9	2.9	0.0602
ENSG00000138193	PLCE1	phospholipase C, epsilon 1	4.6	3.82	-1.1	10	0.0602
ENSG00000143891	GALM	galactose mutarotase (aldose 1-epimerase)	-2.8	3.82	-8	0	0.0602
ENSG00000196878	LAMB3	laminin, beta 3	-2.2	3.81	-7	2.3	0.0606
ENSG00000126106	TMEM53	transmembrane protein 53	-1.6	3.81	-5	5.9	0.0606
ENSG00000129295	LRRC6	leucine rich repeat containing 6	1.7	3.81	-3.5	6	0.0606
ENSG00000231637	USP17L29	ubiquitin specific peptidase 17-like family member 29	-1.9	3.81	-5	-0.2	0.0606
ENSG00000127743	IL17B	interleukin 17B	-1.9	3.81	-7	1.4	0.0606
ENSG00000163703	CRELD1	cysteine-rich with EGF-like domains 1	4.9	3.81	0.1	10	0.0606
ENSG00000130158	DOCK6	dedicator of cytokinesis 6	-2.1	3.81	-7	-0.1	0.0606
ENSG00000234949	AC104667.3	N/A	2.3	3.81	-0.1	6.7	0.0606
ENSG00000124299	PEPD	peptidase D	1.6	3.81	-0.2	7.3	0.0606
ENSG00000119632	IFI27L2	interferon, alpha-inducible protein 27-like 2	2.2	3.8	-0.1	6.8	0.0609
ENSG00000109065	NAT9	N-acetyltransferase 9 (GCN5-related, putative)	1.9	3.8	0.1	6	0.0609
ENSG00000196071	OR2L13	olfactory receptor, family 2, subfamily L, member 13	2.8	3.8	0.1	7.8	0.0609
ENSG00000008438	PGLYRP1	peptidoglycan recognition protein 1	3.1	3.8	0.3	8.6	0.0609
ENSG00000118137	APOA1	apolipoprotein A-I	1.5	3.8	-1.9	5	0.0609
ENSG00000124257	NEURL2	neuralized E3 ubiquitin protein ligase 2	-2.2	3.8	-6	1.1	0.0609
ENSG00000110711	AIP	aryl hydrocarbon receptor interacting protein	2.8	3.8	0.3	7.6	0.0609
ENSG00000165061	ZMAT4	zinc finger, matrin-type 4	5	3.79	0.9	10	0.0612
ENSG00000151611	MMAA	methylmalonic aciduria (cobalamin deficiency) cblA type	-1.8	3.79	-5	1	0.0612
ENSG00000075884	ARHGAP15	Rho GTPase activating protein 15	3.3	3.79	-0.7	7	0.0612
ENSG00000143164	DCAF6	DDB1 and CUL4 associated factor 6	2.2	3.79	0.2	8.7	0.0612
ENSG00000213888	AC005003.1	N/A	2.7	3.79	-0.3	7	0.0612
ENSG00000006432	MAP3K9	mitogen-activated protein kinase kinase kinase 9	2.2	3.79	-0.2	5.8	0.0612
ENSG00000143390	RFX5	regulatory factor X, 5 (influences HLA class II expression)	2.4	3.78	-2.4	6	0.0615
ENSG00000167113	COQ4	coenzyme Q4	4.6	3.78	0.3	9	0.0615
ENSG00000091106	NLRC4	NLR family, CARD domain containing 4	2.7	3.78	-1.7	8	0.0615
ENSG00000211890	IGHA2	immunoglobulin heavy constant alpha 2 (A2m marker)	-2.2	3.77	-6.6	0.2	0.0619
ENSG00000113368	LMNB1	lamin B1	-1.1	3.77	-3.3	0	0.0619
ENSG00000167840	ZNF232	zinc finger protein 232	-2	3.77	-6	1.7	0.0619
ENSG00000166862	CACNG2	calcium channel, voltage-dependent, gamma subunit 2	1.8	3.77	-0.3	5.7	0.0619
ENSG00000075856	SART3	squamous cell carcinoma antigen recognized by T cells 3	4.7	3.77	-1.8	10	0.0619
ENSG00000174796	THAP6	THAP domain containing 6	-2	3.77	-6	0.6	0.0619
ENSG00000141316	SPACA3	sperm acrosome associated 3	-3.1	3.77	-8	-0.7	0.0619
ENSG00000198092	TMPRSS11F	transmembrane protease, serine 11F	-2.1	3.76	-5.2	-0.1	0.0622
ENSG00000151117	TMEM86A	transmembrane protein 86A	2.2	3.76	-1	7	0.0622
ENSG00000171476	HOPX	HOP homeobox	4.7	3.76	0.4	10	0.0622
ENSG00000138231	DBR1	debranching RNA lariats 1	4	3.76	0.2	9	0.0622
ENSG00000244617	ASPRV1	aspartic peptidase, retroviral-like 1	1.4	3.76	0	3.9	0.0622
ENSG00000100281	HMGXB4	HMG box domain containing 4	3.5	3.76	0.2	8	0.0622
ENSG00000118046	STK11	serine/threonine kinase 11	2.7	3.76	0.1	7	0.0622
ENSG00000104814	MAP4K1	mitogen-activated protein kinase kinase kinase kinase 1	1.4	3.75	-0.5	4.8	0.0625
ENSG00000127080	IPPK	inositol 1,3,4,5,6-pentakisphosphate 2-kinase	3.3	3.75	0.2	8.8	0.0625
ENSG00000182481	KPNA2	karyopherin alpha 2 (RAG cohort 1, importin alpha 1)	4.6	3.75	-1.6	10	0.0625
ENSG00000198657	OR8B4	olfactory receptor, family 8, subfamily B, member 4	2.3	3.75	-0.2	7	0.0625
ENSG00000156256	USP16	ubiquitin specific peptidase 16	-2.9	3.75	-8	3	0.0625
ENSG00000196812	ZSCAN16	zinc finger and SCAN domain containing 16	2.1	3.75	-0.4	6	0.0625
ENSG00000111962	UST	uronyl-2-sulfotransferase	3	3.75	0.1	7	0.0625
ENSG00000158290	CUL4B	cullin 4B	-2.4	3.75	-7	1	0.0625
ENSG00000087269	NOP14	NOP14 nucleolar protein	-1.4	3.74	-4.9	0.3	0.0629
ENSG00000221829	FANCG	Fanconi anemia, complementation group G	1.4	3.74	-0.2	4.6	0.0629
ENSG00000172795	DCP2	decapping mRNA 2	-1.7	3.74	-6	4.7	0.0629
ENSG00000100124	ANKRD54	ankyrin repeat domain 54	1.5	3.74	0.1	3.6	0.0629
ENSG00000130202	PVRL2	poliovirus receptor-related 2 (herpesvirus entry mediator B)	1.6	3.74	0.1	3.5	0.0629
ENSG00000161270	NPHS1	nephrosis 1, congenital, Finnish type (nephrin)	3.4	3.74	0.3	8.9	0.0629
ENSG00000138675	FGF5	fibroblast growth factor 5	2	3.74	-1	6	0.0629
ENSG00000031691	CENPQ	centromere protein Q	-1.7	3.74	-5	0.1	0.0629
ENSG00000214518	KRTAP2-2	keratin associated protein 2-2	-2.5	3.73	-6	-0.8	0.0632
ENSG00000122547	EEPD1	endonuclease/exonuclease/phosphatase family domain containing 1	-1.8	3.73	-4.7	4.6	0.0632
ENSG00000167825	OR5I1	olfactory receptor, family 5, subfamily I, member 1	-1.9	3.73	-6	1.7	0.0632
ENSG00000113391	FAM172A	family with sequence similarity 172, member A	3	3.73	0	8	0.0632
ENSG00000242247	ARFGAP3	ADP-ribosylation factor GTPase activating protein 3	-2	3.73	-6	3.4	0.0632
ENSG00000196814	MVB12B	multivesicular body subunit 12B	-3.1	3.72	-8	-0.1	0.0636
ENSG00000120963	ZNF706	zinc finger protein 706	2.5	3.72	0.1	6.6	0.0636
ENSG00000240864	IGKV1-16	immunoglobulin kappa variable 1-16	3.3	3.72	0.9	7	0.0636
ENSG00000181019	NQO1	NAD(P)H dehydrogenase, quinone 1	2.6	3.72	-0.6	7	0.0636
ENSG00000167978	SRRM2	serine/arginine repetitive matrix 2	2.8	3.72	-3.7	7.9	0.0636
ENSG00000145681	HAPLN1	hyaluronan and proteoglycan link protein 1	3.2	3.72	-1.1	8	0.0636
ENSG00000182858	ALG12	ALG12, alpha-1,6-mannosyltransferase	4.7	3.72	0.6	10	0.0636
ENSG00000185860	C1ORF110	chromosome 1 open reading frame 110	4.6	3.72	0.2	10	0.0636
ENSG00000175143	OR2T1	olfactory receptor, family 2, subfamily T, member 1	-2.2	3.72	-7	1.4	0.0636
ENSG00000023171	GRAMD1B	GRAM domain containing 1B	3.1	3.72	0.2	8.9	0.0636
ENSG00000197965	MPZL1	myelin protein zero-like 1	2.2	3.71	-0.3	6.6	0.064
ENSG00000124207	CSE1L	CSE1 chromosome segregation 1-like (yeast)	2.4	3.71	-0.1	7	0.064
ENSG00000134504	KCTD1	potassium channel tetramerization domain containing 1	5	3.71	-2	10	0.064
ENSG00000131480	AOC2	amine oxidase, copper containing 2 (retina-specific)	-2.2	3.71	-6	0.7	0.064
ENSG00000228567	VN1R4	vomeronasal 1 receptor 4	3.1	3.71	-2.9	7	0.064
ENSG00000101425	BPI	bactericidal/permeability-increasing protein	-1.9	3.71	-7	0	0.064
ENSG00000076650	GPATCH1	G patch domain containing 1	3	3.7	0.6	7.6	0.0643
ENSG00000220008	LINGO3	leucine rich repeat and Ig domain containing 3	4.8	3.7	0.7	10	0.0643
ENSG00000126218	F10	coagulation factor X	-1.9	3.7	-6.7	6.2	0.0643
ENSG00000062598	ELMO2	engulfment and cell motility 2	1.9	3.7	-0.3	6.5	0.0643
ENSG00000211654	IGLV5-37	immunoglobulin lambda variable 5-37	-2.4	3.7	-7	2.7	0.0643
ENSG00000158711	ELK4	ELK4, ETS-domain protein (SRF accessory protein 1)	-1.9	3.7	-6.8	0.1	0.0643
ENSG00000176153	GPX2	glutathione peroxidase 2 (gastrointestinal)	-2.2	3.7	-7	0.2	0.0643
ENSG00000160714	UBE2Q1	ubiquitin-conjugating enzyme E2Q family member 1	1.9	3.69	-0.1	5.5	0.0647
ENSG00000137185	ZSCAN9	zinc finger and SCAN domain containing 9	-1.9	3.69	-6	1.7	0.0647
ENSG00000127415	IDUA	iduronidase, alpha-L-	2.8	3.69	-2.2	7	0.0647
ENSG00000115884	SDC1	syndecan 1	1.7	3.69	-0.2	5.3	0.0647
ENSG00000268206	AC061975.10	N/A	3.7	3.69	0.5	7	0.0647
ENSG00000167674	HDGFRP2	hepatoma-derived growth factor-related protein 2	-1.7	3.69	-5.9	0.8	0.0647
ENSG00000130529	TRPM4	transient receptor potential cation channel, subfamily M, member 4	1.3	3.69	0	4	0.0647
ENSG00000183665	TRMT12	tRNA methyltransferase 12 homolog (S. cerevisiae)	4.9	3.69	-0.6	10	0.0647
ENSG00000132424	PNISR	PNN-interacting serine/arginine-rich protein	2.4	3.69	-0.8	7	0.0647
ENSG00000124209	RAB22A	RAB22A, member RAS oncogene family	-2.8	3.69	-8	0	0.0647
ENSG00000268341	L47234.1	N/A	4	3.69	-1	9	0.0647
ENSG00000198010	DLGAP2	discs, large (Drosophila) homolog-associated protein 2	2	3.68	-0.6	6	0.065
ENSG00000270033	RP11-51L5.7	N/A	1.8	3.68	-0.4	5.7	0.065
ENSG00000160783	PMF1	polyamine-modulated factor 1	-3	3.68	-7	0.3	0.065
ENSG00000203857	HSD3B1	hydroxy-delta-5-steroid dehydrogenase, 3 beta- and steroid delta-isomerase 1	-1.7	3.68	-7	1.1	0.065
ENSG00000106665	CLIP2	CAP-GLY domain containing linker protein 2	-2.3	3.68	-7	0.6	0.065
ENSG00000111144	LTA4H	leukotriene A4 hydrolase	5.2	3.68	-0.2	11	0.065
ENSG00000187612	OR5W2	olfactory receptor, family 5, subfamily W, member 2	-1.9	3.68	-6	0.4	0.065
ENSG00000170075	GPR37L1	G protein-coupled receptor 37 like 1	-1.5	3.68	-5	3.7	0.065
ENSG00000113048	MRPS27	mitochondrial ribosomal protein S27	2.8	3.68	-0.9	6	0.065
ENSG00000102054	RBBP7	retinoblastoma binding protein 7	-2.5	3.68	-7	1.8	0.065
ENSG00000140471	LINS	lines homolog (Drosophila)	1.3	3.68	0	4.1	0.065
ENSG00000150594	ADRA2A	adrenoceptor alpha 2A	2	3.67	-1.1	5	0.0653
ENSG00000068971	PPP2R5B	protein phosphatase 2, regulatory subunit B', beta	-2	3.67	-6	1.9	0.0653
ENSG00000136243	NUPL2	nucleoporin like 2	-1.3	3.67	-4.5	0.3	0.0653
ENSG00000143816	WNT9A	wingless-type MMTV integration site family, member 9A	2.8	3.67	-1	7	0.0653
ENSG00000027001	MIPEP	mitochondrial intermediate peptidase	3.3	3.67	-1.1	9	0.0653
ENSG00000165891	E2F7	E2F transcription factor 7	1.5	3.67	0	4.8	0.0653
ENSG00000140632	GLYR1	glyoxylate reductase 1 homolog (Arabidopsis)	-1.6	3.67	-5	0.8	0.0653
ENSG00000100425	BRD1	bromodomain containing 1	3.2	3.66	-2.5	7	0.0657
ENSG00000179528	LBX2	ladybird homeobox 2	2.3	3.66	0	6	0.0657
ENSG00000198612	COPS8	COP9 signalosome subunit 8	2.4	3.66	-5.4	7	0.0657
ENSG00000181761	OR8H3	olfactory receptor, family 8, subfamily H, member 3	1.7	3.66	-0.5	4.8	0.0657
ENSG00000108963	DPH1	diphthamide biosynthesis 1	2.1	3.66	-0.2	6.9	0.0657
ENSG00000172270	BSG	basigin (Ok blood group)	-1.5	3.66	-5	1.5	0.0657
ENSG00000162009	SSTR5	somatostatin receptor 5	-1.5	3.66	-4.6	0.2	0.0657
ENSG00000143702	CEP170	centrosomal protein 170kDa	-1.3	3.66	-4	0.4	0.0657
ENSG00000108813	DLX4	distal-less homeobox 4	2	3.66	-0.1	6	0.0657
ENSG00000143337	TOR1AIP1	torsin A interacting protein 1	-1.8	3.66	-5	5.8	0.0657
ENSG00000196730	DAPK1	death-associated protein kinase 1	-1.8	3.66	-6	0.5	0.0657
ENSG00000068796	KIF2A	kinesin heavy chain member 2A	-1.6	3.66	-5.9	2.6	0.0657
ENSG00000164125	FAM198B	family with sequence similarity 198, member B	-1.8	3.65	-5.9	0.5	0.066
ENSG00000149792	MRPL49	mitochondrial ribosomal protein L49	1.9	3.65	-0.6	5	0.066
ENSG00000206026	SMIM21	small integral membrane protein 21	2	3.65	-0.3	6	0.066
ENSG00000139155	SLCO1C1	solute carrier organic anion transporter family, member 1C1	2.1	3.65	-0.3	6.6	0.066
ENSG00000130311	DDA1	DET1 and DDB1 associated 1	-2.1	3.65	-5.9	0.2	0.066
ENSG00000126953	TIMM8A	translocase of inner mitochondrial membrane 8 homolog A (yeast)	3.1	3.64	0.1	7	0.0664
ENSG00000004059	ARF5	ADP-ribosylation factor 5	-2.4	3.64	-7	0.3	0.0664
ENSG00000185129	PURA	purine-rich element binding protein A	-1.7	3.64	-5	0.2	0.0664
ENSG00000226288	OR52I2	olfactory receptor, family 52, subfamily I, member 2	5.1	3.64	0.1	10	0.0664
ENSG00000079257	LXN	latexin	2.1	3.64	-1.4	6	0.0664
ENSG00000141977	CIB3	calcium and integrin binding family member 3	1.8	3.64	-2.7	5	0.0664
ENSG00000185821	OR6C76	olfactory receptor, family 6, subfamily C, member 76	-2.2	3.63	-7	0.9	0.0668
ENSG00000146872	TLK2	tousled-like kinase 2	3.2	3.63	-0.4	7	0.0668
ENSG00000142039	CCDC97	coiled-coil domain containing 97	1.7	3.63	-0.2	5.7	0.0668
ENSG00000105198	LGALS13	lectin, galactoside-binding, soluble, 13	1.7	3.63	0.1	5.1	0.0668
ENSG00000051128	HOMER3	homer homolog 3 (Drosophila)	2	3.63	-1.2	6	0.0668
ENSG00000181555	SETD2	SET domain containing 2	-1.4	3.63	-4	2.1	0.0668
ENSG00000120875	DUSP4	dual specificity phosphatase 4	-2.4	3.63	-7	0.7	0.0668
ENSG00000178700	DHFRL1	dihydrofolate reductase-like 1	-1.8	3.63	-5.9	1.7	0.0668
ENSG00000187003	ACTL7A	actin-like 7A	2.9	3.62	0	8	0.0671
ENSG00000163444	TMEM183A	transmembrane protein 183A	3.1	3.62	0.1	9	0.0671
ENSG00000119314	PTBP3	polypyrimidine tract binding protein 3	-1.2	3.62	-3.5	-0.1	0.0671
ENSG00000094880	CDC23	cell division cycle 23	-2.2	3.62	-4.9	-0.5	0.0671
ENSG00000160199	PKNOX1	PBX/knotted 1 homeobox 1	1.9	3.62	0.2	4.5	0.0671
ENSG00000101972	STAG2	stromal antigen 2	1.6	3.62	-0.4	4.8	0.0671
ENSG00000174343	CHRNA9	cholinergic receptor, nicotinic, alpha 9 (neuronal)	-1.3	3.61	-4	2.1	0.0675
ENSG00000108797	CNTNAP1	contactin associated protein 1	2.4	3.61	0	6.7	0.0675
ENSG00000156738	MS4A1	membrane-spanning 4-domains, subfamily A, member 1	1.9	3.61	0	5.6	0.0675
ENSG00000145337	PYURF	PIGY upstream reading frame	1.8	3.61	-0.9	5	0.0675
ENSG00000100292	HMOX1	heme oxygenase (decycling) 1	-1.4	3.61	-6	0.8	0.0675
ENSG00000184108	TRIML1	tripartite motif family-like 1	2.2	3.6	0.1	6	0.0679
ENSG00000170266	GLB1	galactosidase, beta 1	1.5	3.6	0	4.1	0.0679
ENSG00000130165	ELOF1	elongation factor 1 homolog (S. cerevisiae)	-1.4	3.6	-3.7	-0.2	0.0679
ENSG00000243137	PSG4	pregnancy specific beta-1-glycoprotein 4	1.9	3.6	-0.9	5	0.0679
ENSG00000186407	CD300E	CD300e molecule	-1.6	3.6	-5.5	0.9	0.0679
ENSG00000166450	PRTG	protogenin	-1.4	3.6	-4	0	0.0679
ENSG00000171916	LGALS9C	lectin, galactoside-binding, soluble, 9C	1.8	3.6	-1.8	7	0.0679
ENSG00000178015	GPR150	G protein-coupled receptor 150	4.5	3.6	-0.2	10	0.0679
ENSG00000180917	CMTR2	cap methyltransferase 2	2.4	3.59	-3.2	6	0.0682
ENSG00000198089	SFI1	Sfi1 homolog, spindle assembly associated (yeast)	-1.3	3.59	-3.4	0	0.0682
ENSG00000099381	SETD1A	SET domain containing 1A	4.7	3.59	-4.1	10	0.0682
ENSG00000266733	TBC1D29	TBC1 domain family, member 29	3.5	3.59	-3.2	7	0.0682
ENSG00000100558	PLEK2	pleckstrin 2	2.2	3.59	-0.4	6.9	0.0682
ENSG00000167100	SAMD14	sterile alpha motif domain containing 14	2.4	3.59	-1.9	6	0.0682
ENSG00000085644	ZNF213	zinc finger protein 213	2.5	3.59	-2.2	7	0.0682
ENSG00000188076	SCGB1C1	secretoglobin, family 1C, member 1	1.9	3.58	-0.4	5.7	0.0686
ENSG00000261857	MIA	melanoma inhibitory activity	1.6	3.58	-0.3	5.3	0.0686
ENSG00000124532	MRS2	MRS2 magnesium transporter	1.4	3.58	0	4.1	0.0686
ENSG00000165478	HEPACAM	hepatic and glial cell adhesion molecule	1.8	3.58	0	4.8	0.0686
ENSG00000167995	BEST1	bestrophin 1	-1.6	3.58	-4.3	-0.1	0.0686
ENSG00000135709	KIAA0513	KIAA0513	2.3	3.58	-0.1	6.7	0.0686
ENSG00000133639	BTG1	B-cell translocation gene 1, anti-proliferative	1.8	3.57	-0.3	5.8	0.069
ENSG00000204160	ZDHHC18	zinc finger, DHHC-type containing 18	1.5	3.57	-0.3	4.5	0.069
ENSG00000129071	MBD4	methyl-CpG binding domain protein 4	-1.7	3.57	-5.8	1.1	0.069
ENSG00000172985	SH3RF3	SH3 domain containing ring finger 3	1.7	3.57	-1.4	5	0.069
ENSG00000198393	ZNF26	zinc finger protein 26	-2.9	3.57	-8	4	0.069
ENSG00000138385	SSB	Sjogren syndrome antigen B (autoantigen La)	4.7	3.57	-1.2	10	0.069
ENSG00000150636	CCDC102B	coiled-coil domain containing 102B	1.4	3.57	0.1	3.5	0.069
ENSG00000141101	NOB1	NIN1/RPN12 binding protein 1 homolog (S. cerevisiae)	-1.6	3.57	-5.5	0.2	0.069
ENSG00000121892	PDS5A	PDS5, regulator of cohesion maintenance, homolog A (S. cerevisiae)	-1.4	3.57	-3.5	-0.1	0.069
ENSG00000183580	FBXL7	F-box and leucine-rich repeat protein 7	1.8	3.57	-0.3	5.8	0.069
ENSG00000130540	SULT4A1	sulfotransferase family 4A, member 1	2.4	3.56	-2.1	7	0.0693
ENSG00000102934	PLLP	plasmolipin	2.1	3.56	-0.9	7	0.0693
ENSG00000196642	RABL6	RAB, member RAS oncogene family-like 6	1.8	3.56	-0.7	5	0.0693
ENSG00000142186	SCYL1	SCY1-like 1 (S. cerevisiae)	-2.5	3.56	-7	2.7	0.0693
ENSG00000187068	C3ORF70	chromosome 3 open reading frame 70	-1.7	3.56	-5.5	0.1	0.0693
ENSG00000213347	MXD3	MAX dimerization protein 3	2.1	3.56	-2	7	0.0693
ENSG00000157193	LRP8	low density lipoprotein receptor-related protein 8, apolipoprotein e receptor	-1.9	3.56	-6	0.7	0.0693
ENSG00000053438	NNAT	neuronatin	2.4	3.56	0	6.8	0.0693
ENSG00000165996	PTPLA	protein tyrosine phosphatase-like (proline instead of catalytic arginine), member A	-3	3.56	-8	2.9	0.0693
ENSG00000137648	TMPRSS4	transmembrane protease, serine 4	4.1	3.56	-1.6	9	0.0693
ENSG00000204366	ZBTB12	zinc finger and BTB domain containing 12	2.1	3.56	0.1	6.8	0.0693
ENSG00000087365	SF3B2	splicing factor 3b, subunit 2, 145kDa	-1.4	3.56	-4.9	0.3	0.0693
ENSG00000139219	COL2A1	collagen, type II, alpha 1	2.2	3.56	-2.4	7	0.0693
ENSG00000133678	TMEM254	transmembrane protein 254	1.6	3.55	-0.2	6.9	0.0697
ENSG00000115317	HTRA2	HtrA serine peptidase 2	-1.5	3.55	-4.2	0	0.0697
ENSG00000112992	NNT	nicotinamide nucleotide transhydrogenase	4.6	3.55	0.7	10	0.0697
ENSG00000149972	CNTN5	contactin 5	2.2	3.55	-2.1	7	0.0697
ENSG00000187244	BCAM	basal cell adhesion molecule (Lutheran blood group)	1.8	3.55	-0.1	4.7	0.0697
ENSG00000115966	ATF2	activating transcription factor 2	3	3.55	0.2	7	0.0697
ENSG00000178093	TSSK6	testis-specific serine kinase 6	2	3.54	0.1	7.8	0.0701
ENSG00000170681	MURC	muscle-related coiled-coil protein	-1.6	3.54	-6	2.8	0.0701
ENSG00000091129	NRCAM	neuronal cell adhesion molecule	1.9	3.54	-0.6	6	0.0701
ENSG00000155918	RAET1L	retinoic acid early transcript 1L	1.8	3.54	-1.4	7.8	0.0701
ENSG00000137824	RMDN3	regulator of microtubule dynamics 3	-1.6	3.54	-5	0.8	0.0701
ENSG00000120805	ARL1	ADP-ribosylation factor-like 1	2	3.54	-0.7	6	0.0701
ENSG00000102547	CAB39L	calcium binding protein 39-like	2.1	3.54	0.1	8.6	0.0701
ENSG00000083635	NUFIP1	nuclear fragile X mental retardation protein interacting protein 1	-2.1	3.53	-6	0.9	0.0705
ENSG00000196367	TRRAP	transformation/transcription domain-associated protein	2.1	3.53	-4.5	6.4	0.0705
ENSG00000136560	TANK	TRAF family member-associated NFKB activator	1.7	3.53	-2.1	6	0.0705
ENSG00000136720	HS6ST1	heparan sulfate 6-O-sulfotransferase 1	4.3	3.53	-2.3	9	0.0705
ENSG00000092020	PPP2R3C	protein phosphatase 2, regulatory subunit B'', gamma	-1.4	3.53	-5.3	0.4	0.0705
ENSG00000005007	UPF1	UPF1 regulator of nonsense transcripts homolog (yeast)	2.4	3.53	-1.2	7	0.0705
ENSG00000100297	MCM5	minichromosome maintenance complex component 5	4.6	3.53	-0.3	10	0.0705
ENSG00000106012	IQCE	IQ motif containing E	1.6	3.53	-1.4	4	0.0705
ENSG00000233701	PRR23C	proline rich 23C	4.8	3.53	0.1	10	0.0705
ENSG00000140465	CYP1A1	cytochrome P450, family 1, subfamily A, polypeptide 1	1.9	3.53	-0.2	4.7	0.0705
ENSG00000184515	BEX5	brain expressed, X-linked 5	1.8	3.52	-0.6	5	0.0709
ENSG00000144649	FAM198A	family with sequence similarity 198, member A	1.9	3.52	-0.9	5	0.0709
ENSG00000148848	ADAM12	ADAM metallopeptidase domain 12	2.1	3.52	-0.8	5	0.0709
ENSG00000166192	SENP8	SUMO/sentrin specific peptidase family member 8	1.5	3.52	-0.4	4.9	0.0709
ENSG00000189233	NUGGC	nuclear GTPase, germinal center associated	-1.7	3.52	-4.4	-0.1	0.0709
ENSG00000169083	AR	androgen receptor	-1.9	3.52	-6	0.4	0.0709
ENSG00000186628	FSD2	fibronectin type III and SPRY domain containing 2	-1.8	3.52	-5	3.2	0.0709
ENSG00000125863	MKKS	McKusick-Kaufman syndrome	-2.4	3.52	-7	1.3	0.0709
ENSG00000269402	AC116407.2	N/A	1.4	3.52	0.2	3.7	0.0709
ENSG00000121064	SCPEP1	serine carboxypeptidase 1	5.1	3.52	-0.8	10	0.0709
ENSG00000179468	OR9A2	olfactory receptor, family 9, subfamily A, member 2	-1.2	3.52	-3.8	0.2	0.0709
ENSG00000162775	RBM15	RNA binding motif protein 15	2.5	3.52	-0.1	7	0.0709
ENSG00000166073	GPR176	G protein-coupled receptor 176	1.9	3.52	-0.3	5	0.0709
ENSG00000198492	YTHDF2	YTH domain family, member 2	-1.9	3.51	-6	1	0.0713
ENSG00000174238	PITPNA	phosphatidylinositol transfer protein, alpha	2	3.51	-1.1	6	0.0713
ENSG00000008952	SEC62	SEC62 homolog (S. cerevisiae)	3.1	3.51	0.2	8.9	0.0713
ENSG00000178776	C5ORF46	chromosome 5 open reading frame 46	4.3	3.51	-1.4	9	0.0713
ENSG00000183032	SLC25A21	solute carrier family 25 (mitochondrial oxoadipate carrier), member 21	2.2	3.51	-0.2	6.7	0.0713
ENSG00000167394	ZNF668	zinc finger protein 668	-1.7	3.51	-5	2.3	0.0713
ENSG00000079393	DUSP13	dual specificity phosphatase 13	-2	3.51	-5.9	0.4	0.0713
ENSG00000122965	RBM19	RNA binding motif protein 19	-1.9	3.51	-6	2.1	0.0713
ENSG00000059378	PARP12	poly (ADP-ribose) polymerase family, member 12	2.1	3.5	-0.4	5	0.0717
ENSG00000172893	DHCR7	7-dehydrocholesterol reductase	1.9	3.5	-1.8	7	0.0717
ENSG00000080644	CHRNA3	cholinergic receptor, nicotinic, alpha 3 (neuronal)	-2.4	3.5	-7	1.3	0.0717
ENSG00000213999	MEF2B	myocyte enhancer factor 2B	3.6	3.5	-0.5	7	0.0717
ENSG00000162039	MEIOB	meiosis specific with OB domains	-1.5	3.5	-4.8	5.5	0.0717
ENSG00000126016	AMOT	angiomotin	-1.3	3.5	-4	1	0.0717
ENSG00000173212	MAB21L3	mab-21-like 3 (C. elegans)	1.9	3.5	-5.6	6.3	0.0717
ENSG00000197887	OR1S2	olfactory receptor, family 1, subfamily S, member 2	-2.1	3.49	-6	0.6	0.0721
ENSG00000083817	ZNF416	zinc finger protein 416	1.6	3.49	-0.6	5.5	0.0721
ENSG00000182986	ZNF320	zinc finger protein 320	-2.9	3.49	-8	0.5	0.0721
ENSG00000103091	WDR59	WD repeat domain 59	-1.5	3.49	-5	1.5	0.0721
ENSG00000269709	AL109659.1	N/A	-1.7	3.49	-5.6	0.5	0.0721
ENSG00000181029	TRAPPC5	trafficking protein particle complex 5	-1.7	3.49	-4.9	0	0.0721
ENSG00000139549	DHH	desert hedgehog	-1.7	3.49	-5.8	0.3	0.0721
ENSG00000165660	FAM175B	family with sequence similarity 175, member B	-2	3.49	-6	1.5	0.0721
ENSG00000179476	C14ORF28	chromosome 14 open reading frame 28	2	3.49	0	8.2	0.0721
ENSG00000168556	ING2	inhibitor of growth family, member 2	-1.6	3.49	-5	3	0.0721
ENSG00000131044	TTLL9	tubulin tyrosine ligase-like family, member 9	1.9	3.48	-0.3	6	0.0725
ENSG00000176248	ANAPC2	anaphase promoting complex subunit 2	-2	3.48	-7	5.3	0.0725
ENSG00000145390	USP53	ubiquitin specific peptidase 53	3.3	3.48	-0.2	8	0.0725
ENSG00000266118	RP11-507M3.1	N/A	-3.2	3.48	-7	4.3	0.0725
ENSG00000113580	NR3C1	nuclear receptor subfamily 3, group C, member 1 (glucocorticoid receptor)	-3.2	3.48	-8	1.1	0.0725
ENSG00000128849	CGNL1	cingulin-like 1	3.1	3.48	-0.3	9	0.0725
ENSG00000167748	KLK1	kallikrein 1	2.6	3.48	0.1	7.4	0.0725
ENSG00000182568	SATB1	SATB homeobox 1	-2.6	3.48	-7	0.7	0.0725
ENSG00000141698	NT5C3B	5'-nucleotidase, cytosolic IIIB	-2	3.48	-7	1	0.0725
ENSG00000181449	SOX2	SRY (sex determining region Y)-box 2	1.5	3.48	0	6.5	0.0725
ENSG00000072756	TRNT1	tRNA nucleotidyl transferase, CCA-adding, 1	2.9	3.47	-0.1	8	0.0729
ENSG00000197183	C20ORF112	N/A	-1.3	3.47	-4.7	0.6	0.0729
ENSG00000133742	CA1	carbonic anhydrase I	2.5	3.47	-0.4	7.8	0.0729
ENSG00000090971	NAT14	N-acetyltransferase 14 (GCN5-related, putative)	2	3.47	0	5.8	0.0729
ENSG00000105229	PIAS4	protein inhibitor of activated STAT, 4	-1.9	3.47	-5.7	3.5	0.0729
ENSG00000145826	LECT2	leukocyte cell-derived chemotaxin 2	-2	3.47	-5.9	0.4	0.0729
ENSG00000211784	TRAV10	T cell receptor alpha variable 10	-1.5	3.47	-4.3	-0.1	0.0729
ENSG00000100448	CTSG	cathepsin G	4	3.47	-0.1	9	0.0729
ENSG00000114450	GNB4	guanine nucleotide binding protein (G protein), beta polypeptide 4	-1.9	3.47	-6	0.9	0.0729
ENSG00000164123	C4ORF45	chromosome 4 open reading frame 45	-3.3	3.47	-8	-0.3	0.0729
ENSG00000186795	KCNK18	potassium channel, subfamily K, member 18	-2.3	3.47	-7	4.1	0.0729
ENSG00000069431	ABCC9	ATP-binding cassette, sub-family C (CFTR/MRP), member 9	-2	3.47	-6	1	0.0729
ENSG00000140525	FANCI	Fanconi anemia, complementation group I	1.8	3.46	-0.2	5	0.0733
ENSG00000131269	ABCB7	ATP-binding cassette, sub-family B (MDR/TAP), member 7	2.6	3.46	-1.2	8	0.0733
ENSG00000187164	KIAA1598	KIAA1598	-1.4	3.46	-4.6	0.2	0.0733
ENSG00000154839	SKA1	spindle and kinetochore associated complex subunit 1	-1.3	3.46	-5	2.8	0.0733
ENSG00000161791	FMNL3	formin-like 3	2.5	3.46	-0.7	8	0.0733
ENSG00000221961	PRR21	proline rich 21	-1.7	3.46	-6	2.2	0.0733
ENSG00000112297	AIM1	absent in melanoma 1	2	3.45	-0.3	5.8	0.0737
ENSG00000185825	BCAP31	B-cell receptor-associated protein 31	2.3	3.45	-0.1	6	0.0737
ENSG00000188177	ZC3H6	zinc finger CCCH-type containing 6	3.2	3.45	-3.2	9	0.0737
ENSG00000178252	WDR6	WD repeat domain 6	2.1	3.45	-2.1	8	0.0737
ENSG00000095066	HOOK2	hook microtubule-tethering protein 2	1.4	3.45	-0.6	6.4	0.0737
ENSG00000185966	LCE3E	late cornified envelope 3E	1.9	3.45	-0.1	5.7	0.0737
ENSG00000112812	PRSS16	protease, serine, 16 (thymus)	1.7	3.45	0	4	0.0737
ENSG00000196391	ZNF774	zinc finger protein 774	3.3	3.44	-0.6	9	0.0742
ENSG00000171053	PATE1	prostate and testis expressed 1	2	3.44	-1.9	6	0.0742
ENSG00000123989	CHPF	chondroitin polymerizing factor	2.9	3.44	0.1	7	0.0742
ENSG00000089050	RBBP9	retinoblastoma binding protein 9	-2.7	3.44	-7.9	-0.2	0.0742
ENSG00000188636	LDOC1L	leucine zipper, down-regulated in cancer 1-like	3	3.44	-1.1	7	0.0742
ENSG00000205809	KLRC2	killer cell lectin-like receptor subfamily C, member 2	-2.3	3.44	-5	2.7	0.0742
ENSG00000164053	ATRIP	ATR interacting protein	1.7	3.43	-0.6	6	0.0745
ENSG00000121289	CEP89	centrosomal protein 89kDa	1.5	3.43	0	6.7	0.0745
ENSG00000143546	S100A8	S100 calcium binding protein A8	-1.5	3.43	-4.7	0.2	0.0745
ENSG00000196242	OR2C3	olfactory receptor, family 2, subfamily C, member 3	-2.4	3.43	-6.7	-0.2	0.0745
ENSG00000120802	TMPO	thymopoietin	-2.6	3.43	-7	0.7	0.0745
ENSG00000166794	PPIB	peptidylprolyl isomerase B (cyclophilin B)	2.3	3.43	-0.9	6	0.0745
ENSG00000229809	ZNF688	zinc finger protein 688	-1.6	3.43	-4	1.5	0.0745
ENSG00000204887	KRTAP1-4	keratin associated protein 1-4	-2.3	3.42	-7	1.1	0.075
ENSG00000103723	AP3B2	adaptor-related protein complex 3, beta 2 subunit	-1.8	3.42	-7	4	0.075
ENSG00000185055	EFCAB10	EF-hand calcium binding domain 10	2.6	3.42	-0.2	8	0.075
ENSG00000162736	NCSTN	nicastrin	1.7	3.42	0	4.9	0.075
ENSG00000234068	PAGE2	P antigen family, member 2 (prostate associated)	1.9	3.42	-0.6	5.7	0.075
ENSG00000171236	LRG1	leucine-rich alpha-2-glycoprotein 1	2.1	3.42	0	6.6	0.075
ENSG00000165304	MELK	maternal embryonic leucine zipper kinase	-3.1	3.42	-8	2.8	0.075
ENSG00000253276	CCDC71L	coiled-coil domain containing 71-like	2.7	3.42	0.4	5.7	0.075
ENSG00000155744	FAM126B	family with sequence similarity 126, member B	-1.8	3.42	-5.5	0.2	0.075
ENSG00000064726	BTBD1	BTB (POZ) domain containing 1	2	3.42	-1.8	5	0.075
ENSG00000152818	UTRN	utrophin	-2.2	3.41	-6.9	-0.1	0.0754
ENSG00000260861	RP4-576H24.4	N/A	2.7	3.41	-1.2	6	0.0754
ENSG00000142025	DMRTC2	DMRT-like family C2	-1.7	3.41	-5.9	3.9	0.0754
ENSG00000142534	RPS11	ribosomal protein S11	-2.3	3.41	-7	3.3	0.0754
ENSG00000170653	ATF7	activating transcription factor 7	-2.2	3.41	-7	3.7	0.0754
ENSG00000188368	PRR19	proline rich 19	1.5	3.41	-0.6	6.9	0.0754
ENSG00000105227	PRX	periaxin	1.5	3.41	-0.9	5	0.0754
ENSG00000109576	AADAT	aminoadipate aminotransferase	1.7	3.41	-0.5	4.9	0.0754
ENSG00000182489	XKRX	XK, Kell blood group complex subunit-related, X-linked	-2.4	3.41	-7	5.8	0.0754
ENSG00000186529	CYP4F3	cytochrome P450, family 4, subfamily F, polypeptide 3	1.7	3.41	0	5	0.0754
ENSG00000174640	SLCO2A1	solute carrier organic anion transporter family, member 2A1	2.6	3.41	0.1	7	0.0754
ENSG00000104881	PPP1R13L	protein phosphatase 1, regulatory subunit 13 like	2.1	3.4	0.1	4.9	0.0758
ENSG00000185627	PSMD13	proteasome (prosome, macropain) 26S subunit, non-ATPase, 13	-1.4	3.4	-4	1.2	0.0758
ENSG00000205045	SLFN12L	schlafen family member 12-like	-1.9	3.4	-6	2.1	0.0758
ENSG00000131015	ULBP2	UL16 binding protein 2	-1.5	3.4	-5	2.4	0.0758
ENSG00000214517	PPME1	protein phosphatase methylesterase 1	-1.5	3.4	-4.7	0.2	0.0758
ENSG00000188771	PLET1	placenta expressed transcript 1	1.5	3.4	-1.3	4.9	0.0758
ENSG00000203909	DPPA5	developmental pluripotency associated 5	1.6	3.39	-1.8	5	0.0762
ENSG00000178403	NEUROG2	neurogenin 2	1.7	3.39	-0.7	5.6	0.0762
ENSG00000129187	DCTD	dCMP deaminase	-1.6	3.39	-5	0.8	0.0762
ENSG00000187550	SBK2	SH3 domain binding kinase family, member 2	2.1	3.39	0	5.7	0.0762
ENSG00000057593	F7	coagulation factor VII (serum prothrombin conversion accelerator)	-1.8	3.39	-6	1.5	0.0762
ENSG00000178233	TMEM151B	transmembrane protein 151B	-1.8	3.39	-6	1.2	0.0762
ENSG00000108443	RPS6KB1	ribosomal protein S6 kinase, 70kDa, polypeptide 1	3.3	3.39	-0.7	8	0.0762
ENSG00000147576	ADHFE1	alcohol dehydrogenase, iron containing, 1	1.7	3.39	0	7.4	0.0762
ENSG00000205678	TECRL	trans-2,3-enoyl-CoA reductase-like	-1.6	3.39	-5	0.3	0.0762
ENSG00000066455	GOLGA5	golgin A5	-2.1	3.39	-7	1.1	0.0762
ENSG00000143858	SYT2	synaptotagmin II	4.2	3.38	-0.4	9	0.0767
ENSG00000196167	COLCA1	colorectal cancer associated 1	-1.6	3.38	-5	0.7	0.0767
ENSG00000105939	ZC3HAV1	zinc finger CCCH-type, antiviral 1	-1.4	3.38	-3.9	0.2	0.0767
ENSG00000140326	CDAN1	codanin 1	-1.9	3.38	-6	2.9	0.0767
ENSG00000092140	G2E3	G2/M-phase specific E3 ubiquitin protein ligase	5	3.38	-3.2	10	0.0767
ENSG00000204849	SPATA31A1	SPATA31 subfamily A, member 1	2.1	3.38	0.3	5.6	0.0767
ENSG00000158623	COPG2	coatomer protein complex, subunit gamma 2	1.9	3.37	0.1	7.5	0.0771
ENSG00000132466	ANKRD17	ankyrin repeat domain 17	1.7	3.37	0.1	4.3	0.0771
ENSG00000106086	PLEKHA8	pleckstrin homology domain containing, family A (phosphoinositide binding specific) member 8	1.9	3.37	-1.8	5.9	0.0771
ENSG00000170734	POLH	polymerase (DNA directed), eta	2.8	3.37	-4.6	8	0.0771
ENSG00000158480	SPATA2	spermatogenesis associated 2	-1.2	3.37	-3.8	0.3	0.0771
ENSG00000113319	RASGRF2	Ras protein-specific guanine nucleotide-releasing factor 2	2.2	3.37	-2.9	6.8	0.0771
ENSG00000133422	MORC2	MORC family CW-type zinc finger 2	-1.7	3.37	-5	2.7	0.0771
ENSG00000173327	MAP3K11	mitogen-activated protein kinase kinase kinase 11	2.3	3.37	-0.4	7	0.0771
ENSG00000090924	PLEKHG2	pleckstrin homology domain containing, family G (with RhoGef domain) member 2	1.5	3.37	-0.1	3.9	0.0771
ENSG00000169245	CXCL10	chemokine (C-X-C motif) ligand 10	-1.8	3.36	-6	5.1	0.0775
ENSG00000259066	RP11-371E8.4	N/A	3.5	3.36	-1.2	7	0.0775
ENSG00000006074	CCL18	chemokine (C-C motif) ligand 18 (pulmonary and activation-regulated)	-1.8	3.36	-6	2.3	0.0775
ENSG00000185347	C14ORF80	chromosome 14 open reading frame 80	1.7	3.36	-1.2	5	0.0775
ENSG00000244165	P2RY11	purinergic receptor P2Y, G-protein coupled, 11	2.3	3.36	-2.2	6	0.0775
ENSG00000165323	FAT3	FAT atypical cadherin 3	2.5	3.36	0	5.7	0.0775
ENSG00000025796	SEC63	SEC63 homolog (S. cerevisiae)	2.1	3.36	-0.2	9	0.0775
ENSG00000132297	HHLA1	HERV-H LTR-associating 1	5	3.36	-0.8	10	0.0775
ENSG00000253207	RP11-67H2.1	N/A	2.1	3.35	-0.5	5	0.0779
ENSG00000205339	IPO7	importin 7	1.9	3.35	-0.7	6	0.0779
ENSG00000212998	RBM12B-AS1	RBM12B antisense RNA 1	-1.6	3.35	-4.7	0.2	0.0779
ENSG00000108465	CDK5RAP3	CDK5 regulatory subunit associated protein 3	-1.7	3.35	-5	3.8	0.0779
ENSG00000121766	ZCCHC17	zinc finger, CCHC domain containing 17	2.9	3.35	-3.4	7	0.0779
ENSG00000143631	FLG	filaggrin	-1.7	3.35	-5	0.8	0.0779
ENSG00000196510	ANAPC7	anaphase promoting complex subunit 7	1.6	3.35	0	5.7	0.0779
ENSG00000167615	LENG8	leukocyte receptor cluster (LRC) member 8	1.5	3.35	-2.5	6.9	0.0779
ENSG00000138166	DUSP5	dual specificity phosphatase 5	2.7	3.35	-0.1	7.7	0.0779
ENSG00000134152	KATNBL1	katanin p80 subunit B-like 1	-1.6	3.34	-5.9	1	0.0784
ENSG00000205106	CTD-2210P24.4	N/A	-3.2	3.34	-8	2.4	0.0784
ENSG00000095321	CRAT	carnitine O-acetyltransferase	2.3	3.34	-2.2	7	0.0784
ENSG00000106823	ECM2	extracellular matrix protein 2, female organ and adipocyte specific	3.4	3.34	-0.4	9	0.0784
ENSG00000147874	HAUS6	HAUS augmin-like complex, subunit 6	-1.4	3.34	-5	4	0.0784
ENSG00000134824	FADS2	fatty acid desaturase 2	1.9	3.34	-0.3	5.8	0.0784
ENSG00000198062	POTEH	POTE ankyrin domain family, member H	-1.9	3.34	-6	0.2	0.0784
ENSG00000147509	RGS20	regulator of G-protein signaling 20	-1.5	3.34	-5	1.7	0.0784
ENSG00000107341	UBE2R2	ubiquitin-conjugating enzyme E2R 2	1.5	3.34	0.1	3.5	0.0784
ENSG00000273049	RP11-834C11.12	N/A	-1.4	3.34	-4.8	0.7	0.0784
ENSG00000160181	TFF2	trefoil factor 2	1.9	3.34	-0.5	5.9	0.0784
ENSG00000185591	SP1	Sp1 transcription factor	2.2	3.33	-2.9	5	0.0788
ENSG00000185294	SPPL2C	signal peptide peptidase like 2C	-3.1	3.33	-8	0.1	0.0788
ENSG00000187242	KRT12	keratin 12	-2	3.33	-6	0.5	0.0788
ENSG00000221909	FAM200A	family with sequence similarity 200, member A	2.1	3.33	0	8.3	0.0788
ENSG00000171940	ZNF217	zinc finger protein 217	-1.8	3.33	-5.6	0.1	0.0788
ENSG00000103740	ACSBG1	acyl-CoA synthetase bubblegum family member 1	2.9	3.33	-0.3	8	0.0788
ENSG00000151702	FLI1	Fli-1 proto-oncogene, ETS transcription factor	1.5	3.33	0.1	3.5	0.0788
ENSG00000163701	IL17RE	interleukin 17 receptor E	1.6	3.33	-0.5	4.9	0.0788
ENSG00000272573	MUSTN1	musculoskeletal, embryonic nuclear protein 1	1.7	3.33	-1.2	6	0.0788
ENSG00000068308	OTUD5	OTU deubiquitinase 5	1.9	3.33	0	5.1	0.0788
ENSG00000189252	SPANXN3	SPANX family, member N3	2.5	3.33	-0.5	7.9	0.0788
ENSG00000169994	MYO7B	myosin VIIB	2.6	3.33	-2.2	6	0.0788
ENSG00000030582	GRN	granulin	2	3.32	-1.4	6	0.0792
ENSG00000174611	KY	kyphoscoliosis peptidase	-2.1	3.32	-7	3.3	0.0792
ENSG00000259207	ITGB3	integrin, beta 3 (platelet glycoprotein IIIa, antigen CD61)	1.9	3.32	-1.3	6	0.0792
ENSG00000175170	FAM182B	family with sequence similarity 182, member B	1.6	3.32	-0.6	5.6	0.0792
ENSG00000131669	NINJ1	ninjurin 1	-2.1	3.32	-5.9	-0.1	0.0792
ENSG00000205609	EIF3CL	eukaryotic translation initiation factor 3, subunit C-like	4.6	3.32	-2.2	9	0.0792
ENSG00000102144	PGK1	phosphoglycerate kinase 1	4	3.32	0.7	8.8	0.0792
ENSG00000086544	ITPKC	inositol-trisphosphate 3-kinase C	1.5	3.32	-0.2	5	0.0792
ENSG00000110514	MADD	MAP-kinase activating death domain	-1.7	3.32	-5	1.3	0.0792
ENSG00000179271	GADD45GIP1	growth arrest and DNA-damage-inducible, gamma interacting protein 1	-1.8	3.32	-6	1.8	0.0792
ENSG00000181472	ZBTB2	zinc finger and BTB domain containing 2	-2.9	3.32	-8	4.1	0.0792
ENSG00000187833	C2ORF78	chromosome 2 open reading frame 78	3.2	3.32	-2.4	9	0.0792
ENSG00000119318	RAD23B	RAD23 homolog B (S. cerevisiae)	2.4	3.32	-1.5	7	0.0792
ENSG00000169181	GSG1L	GSG1-like	3.4	3.31	-2.1	8	0.0797
ENSG00000176204	LRRTM4	leucine rich repeat transmembrane neuronal 4	1.9	3.31	-1.4	6	0.0797
ENSG00000116016	EPAS1	endothelial PAS domain protein 1	1.8	3.31	-1.9	6	0.0797
ENSG00000203814	HIST2H2BF	histone cluster 2, H2bf	1.9	3.3	-0.6	6.9	0.0801
ENSG00000112294	ALDH5A1	aldehyde dehydrogenase 5 family, member A1	2.4	3.3	-0.3	5.9	0.0801
ENSG00000160392	C19ORF47	chromosome 19 open reading frame 47	1.8	3.3	-0.7	5	0.0801
ENSG00000169857	AVEN	apoptosis, caspase activation inhibitor	-1.4	3.3	-5	0.9	0.0801
ENSG00000108439	PNPO	pyridoxamine 5'-phosphate oxidase	4.2	3.3	-0.4	9	0.0801
ENSG00000183837	PNMA3	paraneoplastic Ma antigen 3	3.1	3.3	-0.2	9	0.0801
ENSG00000143545	RAB13	RAB13, member RAS oncogene family	2.5	3.3	-3.4	6	0.0801
ENSG00000206418	RAB12	RAB12, member RAS oncogene family	1.6	3.3	-0.9	5	0.0801
ENSG00000168748	CA7	carbonic anhydrase VII	-1.4	3.3	-4	2.4	0.0801
ENSG00000166926	MS4A6E	membrane-spanning 4-domains, subfamily A, member 6E	1.6	3.3	-0.5	5.6	0.0801
ENSG00000155304	HSPA13	heat shock protein 70kDa family, member 13	-2.8	3.3	-7.9	-0.2	0.0801
ENSG00000153789	FAM92B	family with sequence similarity 92, member B	2.9	3.29	0.4	7.9	0.0806
ENSG00000078142	PIK3C3	phosphatidylinositol 3-kinase, catalytic subunit type 3	-1.6	3.29	-6	4.9	0.0806
ENSG00000215712	TMEM242	transmembrane protein 242	4.1	3.29	-0.4	9	0.0806
ENSG00000109851	DBX1	developing brain homeobox 1	1.8	3.29	-0.8	6	0.0806
ENSG00000136834	OR1J1	olfactory receptor, family 1, subfamily J, member 1	-1.4	3.29	-5	0.9	0.0806
ENSG00000136152	COG3	component of oligomeric golgi complex 3	-1.7	3.29	-5.6	0.2	0.0806
ENSG00000204960	BLACE	B-cell acute lymphoblastic leukemia expressed	-3.2	3.29	-8	0.3	0.0806
ENSG00000196099	OR6M1	olfactory receptor, family 6, subfamily M, member 1	3	3.29	0.2	7	0.0806
ENSG00000011451	WIZ	widely interspaced zinc finger motifs	1.6	3.29	-0.4	5.3	0.0806
ENSG00000141510	TP53	tumor protein p53	-1.6	3.29	-5.6	0.8	0.0806
ENSG00000171368	TPPP	tubulin polymerization promoting protein	-1.5	3.29	-5	1.4	0.0806
ENSG00000204304	PBX2	pre-B-cell leukemia homeobox 2	1.9	3.28	-0.4	5	0.081
ENSG00000105695	MAG	myelin associated glycoprotein	1.4	3.28	0	3.4	0.081
ENSG00000178342	KCNG2	potassium voltage-gated channel, subfamily G, member 2	1.8	3.28	0	8	0.081
ENSG00000173930	SLCO4C1	solute carrier organic anion transporter family, member 4C1	1.9	3.28	-0.4	5	0.081
ENSG00000204140	CLPSL1	colipase-like 1	-1.4	3.28	-4.9	0.4	0.081
ENSG00000070018	LRP6	low density lipoprotein receptor-related protein 6	-1.7	3.28	-6	1.9	0.081
ENSG00000021762	OSBPL5	oxysterol binding protein-like 5	-2	3.28	-6	1.6	0.081
ENSG00000204828	FOXD4L2	N/A	2.3	3.28	-0.8	5	0.081
ENSG00000269237	CTD-2561J22.3	N/A	-1.5	3.28	-4	1.4	0.081
ENSG00000107618	RBP3	retinol binding protein 3, interstitial	-1.8	3.28	-6	0.5	0.081
ENSG00000179750	APOBEC3B	apolipoprotein B mRNA editing enzyme, catalytic polypeptide-like 3B	-1.2	3.28	-4	5	0.081
ENSG00000166750	SLFN5	schlafen family member 5	-1.7	3.28	-5.9	1.1	0.081
ENSG00000222020	AC062017.1	N/A	1.6	3.28	-0.3	4.6	0.081
ENSG00000120688	WBP4	WW domain binding protein 4	2	3.28	-0.1	4.8	0.081
ENSG00000125966	MMP24	matrix metallopeptidase 24 (membrane-inserted)	1.9	3.27	-1.3	6	0.0815
ENSG00000110665	C11ORF21	chromosome 11 open reading frame 21	4.7	3.27	0.3	10	0.0815
ENSG00000156802	ATAD2	ATPase family, AAA domain containing 2	-1.4	3.27	-4.8	0.6	0.0815
ENSG00000001630	CYP51A1	cytochrome P450, family 51, subfamily A, polypeptide 1	4.9	3.27	0.7	10	0.0815
ENSG00000122971	ACADS	acyl-CoA dehydrogenase, C-2 to C-3 short chain	-1.5	3.27	-4.2	0	0.0815
ENSG00000155066	PROM2	prominin 2	-1.7	3.27	-4.5	-0.1	0.0815
ENSG00000022267	FHL1	four and a half LIM domains 1	-2.2	3.27	-7	1.1	0.0815
ENSG00000138028	CGREF1	cell growth regulator with EF-hand domain 1	-1.9	3.26	-7	2.4	0.0819
ENSG00000164116	GUCY1A3	guanylate cyclase 1, soluble, alpha 3	2	3.26	-1.7	6.5	0.0819
ENSG00000172932	ANKRD13D	ankyrin repeat domain 13 family, member D	-1.4	3.26	-5	1.4	0.0819
ENSG00000128881	TTBK2	tau tubulin kinase 2	-1.5	3.26	-5.6	5.3	0.0819
ENSG00000165819	METTL3	methyltransferase like 3	-1.6	3.26	-5.7	0.6	0.0819
ENSG00000160325	CACFD1	calcium channel flower domain containing 1	-2.5	3.26	-7	0	0.0819
ENSG00000185933	CALHM1	calcium homeostasis modulator 1	-2.7	3.26	-7	1.4	0.0819
ENSG00000153975	ZUFSP	zinc finger with UFM1-specific peptidase domain	2.9	3.26	0.1	7.9	0.0819
ENSG00000125818	PSMF1	proteasome (prosome, macropain) inhibitor subunit 1 (PI31)	2.3	3.26	-0.2	6.8	0.0819
ENSG00000163362	C1ORF106	chromosome 1 open reading frame 106	1.6	3.25	-0.6	5.6	0.0824
ENSG00000143162	CREG1	cellular repressor of E1A-stimulated genes 1	-2	3.25	-7	1.9	0.0824
ENSG00000164889	SLC4A2	solute carrier family 4 (anion exchanger), member 2	-1.5	3.25	-5	1.9	0.0824
ENSG00000137221	TJAP1	tight junction associated protein 1 (peripheral)	-1.8	3.25	-5.1	0	0.0824
ENSG00000138823	MTTP	microsomal triglyceride transfer protein	-1.4	3.25	-3.9	0.1	0.0824
ENSG00000117010	ZNF684	zinc finger protein 684	-1.4	3.25	-5	0.9	0.0824
ENSG00000100362	PVALB	parvalbumin	-2.1	3.25	-6	1.8	0.0824
ENSG00000157741	UBN2	ubinuclein 2	-1.8	3.25	-5.9	0.5	0.0824
ENSG00000112893	MAN2A1	mannosidase, alpha, class 2A, member 1	-1.8	3.25	-5.1	0	0.0824
ENSG00000171130	ATP6V0E2	ATPase, H+ transporting V0 subunit e2	-1.5	3.24	-4	2.3	0.0828
ENSG00000213927	CCL27	chemokine (C-C motif) ligand 27	3.1	3.24	-4	7	0.0828
ENSG00000079435	LIPE	lipase, hormone-sensitive	1.8	3.24	-0.7	6	0.0828
ENSG00000071553	ATP6AP1	ATPase, H+ transporting, lysosomal accessory protein 1	-2.3	3.24	-6	1.4	0.0828
ENSG00000211674	IGLJ1	immunoglobulin lambda joining 1	1.5	3.24	0.1	4.4	0.0828
ENSG00000184937	WT1	Wilms tumor 1	1.5	3.24	-0.9	5	0.0828
[truncated: 18,450 more rows]

## Sheet: Genome-wide replicate 2
#GeneID	Symbol	GeneInfo	casTLE Effect	casTLE Score	Minimum Effect Estimate	Maximum Effect Estimate	casTLE p-value
ENSG00000012124	CD22	CD22 molecule	7.2	252	6.2	10.8	3.33e-07
ENSG00000139508	SLC46A3	solute carrier family 46, member 3	7.6	244	6.3	11.2	3.33e-07
ENSG00000161091	MFSD12	major facilitator superfamily domain containing 12	6.4	121	5.1	9.8	3.33e-07
ENSG00000167716	WDR81	WD repeat domain 81	6.2	109	4.5	9.5	3.33e-07
ENSG00000105875	WDR91	WD repeat domain 91	5.7	72.1	4.1	9.3	3.33e-07
ENSG00000108039	XPNPEP1	X-prolyl aminopeptidase (aminopeptidase P) 1, soluble	4.1	59.5	3	6.6	3.33e-07
ENSG00000144224	UBXN4	UBX domain protein 4	4.1	58.9	3	6.8	3.33e-07
ENSG00000133895	MEN1	multiple endocrine neoplasia I	4.1	57.8	3	6.9	3.33e-07
ENSG00000169813	HNRNPF	heterogeneous nuclear ribonucleoprotein F	4.2	50.3	2.9	6.8	3.33e-07
ENSG00000075785	RAB7A	RAB7A, member RAS oncogene family	4.9	49.6	3.1	7.7	3.33e-07
ENSG00000186416	NKRF	NFKB repressing factor	3.9	47.7	2.7	6.3	3.33e-07
ENSG00000168421	RHOH	ras homolog family member H	4	47.6	2.8	6.8	3.33e-07
ENSG00000184207	PGP	phosphoglycolate phosphatase	3.9	45	2.7	6.6	6.67e-07
ENSG00000040531	CTNS	cystinosin, lysosomal cystine transporter	3.9	42.1	2.6	6.6	1.33e-06
ENSG00000064601	CTSA	cathepsin A	3.7	39.2	2.3	6.8	1.33e-06
ENSG00000163349	HIPK1	homeodomain interacting protein kinase 1	4.7	38.3	3.1	8	1.33e-06
ENSG00000167182	SP2	Sp2 transcription factor	4.1	36.4	2.7	7.4	1.67e-06
ENSG00000114902	SPCS1	signal peptidase complex subunit 1 homolog (S. cerevisiae)	4.8	35.9	3.3	8.7	2e-06
ENSG00000163131	CTSS	cathepsin S	3.7	35.6	2.4	6.1	2e-06
ENSG00000115758	ODC1	ornithine decarboxylase 1	3.2	33.7	2	5.4	2.33e-06
ENSG00000204120	GIGYF2	GRB10 interacting GYF protein 2	-3.3	33.5	-5.7	-1.8	2.33e-06
ENSG00000108107	RPL28	ribosomal protein L28	4.1	33.1	2.6	7	2.67e-06
ENSG00000131944	C19ORF40	chromosome 19 open reading frame 40	4.2	31.6	2.5	7.3	3.67e-06
ENSG00000170684	ZNF296	zinc finger protein 296	7.8	30.1	3.8	14.7	1.07e-05
ENSG00000120690	ELF1	E74-like factor 1 (ets domain transcription factor)	3.9	29.6	2.3	6.7	1.23e-05
ENSG00000118058	KMT2A	lysine (K)-specific methyltransferase 2A	3.5	29.6	2.1	6.2	1.23e-05
ENSG00000124357	NAGK	N-acetylglucosamine kinase	4	29.3	2.4	6.9	1.3e-05
ENSG00000109332	UBE2D3	ubiquitin-conjugating enzyme E2D 3	-3	28.3	-5.4	-1.7	2.23e-05
ENSG00000104885	DOT1L	DOT1-like histone H3K79 methyltransferase	4	28.1	2.2	7.5	2.3e-05
ENSG00000163875	MEAF6	MYST/Esa1-associated factor 6	3.6	27.8	2.2	6.8	2.57e-05
ENSG00000155903	RASA2	RAS p21 protein activator 2	-3.6	27.4	-7.2	-1.9	3.03e-05
ENSG00000081154	PCNP	PEST proteolytic signal containing nuclear protein	3.4	27.3	2.1	6.1	3.13e-05
ENSG00000135930	EIF4E2	eukaryotic translation initiation factor 4E family member 2	-3.4	26.5	-6.4	-1.8	4.67e-05
ENSG00000130313	PGLS	6-phosphogluconolactonase	3.1	26.1	1.9	5.6	5.8e-05
ENSG00000010671	BTK	Bruton agammaglobulinemia tyrosine kinase	2.9	25.8	1.7	5.2	6.5e-05
ENSG00000169045	HNRNPH1	heterogeneous nuclear ribonucleoprotein H1 (H)	6.5	24.9	3.6	12.8	9.17e-05
ENSG00000153015	CWC27	CWC27 spliceosome-associated protein homolog (S. cerevisiae)	3.4	24.9	2	6.6	9.17e-05
ENSG00000197713	RPE	ribulose-5-phosphate-3-epimerase	2.8	24.8	1.7	5.3	9.63e-05
ENSG00000168710	AHCYL1	adenosylhomocysteinase-like 1	2.7	24.4	1.6	5.2	0.000113
ENSG00000133561	GIMAP6	GTPase, IMAP family member 6	-3.7	24	-7.9	-1.5	0.000133
ENSG00000134954	ETS1	v-ets avian erythroblastosis virus E26 oncogene homolog 1	3.6	23.6	2	6.6	0.000156
ENSG00000151923	TIAL1	TIA1 cytotoxic granule-associated RNA binding protein-like 1	-3	22.9	-5.8	-1.6	0.000207
ENSG00000120526	NUDCD1	NudC domain containing 1	2.7	22.8	1.6	4.8	0.000216
ENSG00000117394	SLC2A1	solute carrier family 2 (facilitated glucose transporter), member 1	3	22.4	1.7	5.7	0.000261
ENSG00000198445	CCT8L2	chaperonin containing TCP1, subunit 8 (theta)-like 2	7.2	22.1	4.3	13.9	0.0003
ENSG00000172348	RCAN2	regulator of calcineurin 2	5.6	22.1	2.9	12.1	0.0003
ENSG00000141452	C18ORF8	chromosome 18 open reading frame 8	3.4	21.9	1.8	6	0.000332
ENSG00000187522	HSPA14	heat shock 70kDa protein 14	3.1	21.4	1.7	5.6	0.000445
ENSG00000137807	KIF23	kinesin family member 23	6.9	21.3	4.7	14	0.000471
ENSG00000227057	WDR46	WD repeat domain 46	6.9	21.3	4.7	14	0.000471
ENSG00000159399	HK2	hexokinase 2	2.7	21.1	1.4	5.5	0.000528
ENSG00000088930	XRN2	5'-3' exoribonuclease 2	7.3	20.9	4.8	14	0.000604
ENSG00000182916	TCEAL7	transcription elongation factor A (SII)-like 7	7.4	20.7	5	15	0.000693
ENSG00000007312	CD79B	CD79b molecule, immunoglobulin-associated beta	3.7	20.5	1.9	6.5	0.000771
ENSG00000272047	GTF2H5	general transcription factor IIH, polypeptide 5	-3	20.3	-5.7	-1.6	0.000895
ENSG00000125968	ID1	inhibitor of DNA binding 1, dominant negative helix-loop-helix protein	6.7	20.2	4	13	0.000957
ENSG00000186185	KIF18B	kinesin family member 18B	2.5	20.1	1.4	4.6	0.00104
ENSG00000124194	GDAP1L1	ganglioside induced differentiation associated protein 1-like 1	6.9	19.9	4.6	14	0.00122
ENSG00000102349	KLF8	Kruppel-like factor 8	6.4	19.7	3.6	13	0.00135
ENSG00000175063	UBE2C	ubiquitin-conjugating enzyme E2C	-2.7	19.6	-5.4	-1.5	0.00139
ENSG00000254469	RP11-849H4.2	N/A	6.4	19.3	3.5	13	0.00144
ENSG00000149480	MTA2	metastasis associated 1 family, member 2	2.9	19.2	1.6	6	0.00145
ENSG00000100522	GNPNAT1	glucosamine-phosphate N-acetyltransferase 1	3.5	19.1	1.6	6.9	0.00147
ENSG00000165025	SYK	spleen tyrosine kinase	3.2	19	1.6	6.4	0.00147
ENSG00000182866	LCK	LCK proto-oncogene, Src family tyrosine kinase	2.7	19	1.4	5.2	0.00147
ENSG00000147050	KDM6A	lysine (K)-specific demethylase 6A	-3.3	18.7	-6.9	-1.6	0.0015
ENSG00000119402	FBXW2	F-box and WD repeat domain containing 2	-2.7	18.6	-5.3	-1.4	0.00152
ENSG00000167770	OTUB1	OTU deubiquitinase, ubiquitin aldehyde binding 1	-2.4	18.5	-4.7	-1.3	0.00153
ENSG00000028310	BRD9	bromodomain containing 9	-2.7	18.4	-5.5	-1.4	0.00154
ENSG00000067955	CBFB	core-binding factor, beta subunit	2.5	18.3	1.3	5	0.00155
ENSG00000066557	LRRC40	leucine rich repeat containing 40	-2.7	18.2	-5.8	-1.2	0.00156
ENSG00000065526	SPEN	spen family transcriptional repressor	-2.9	18.1	-5.7	-1.5	0.00157
ENSG00000241127	YAE1D1	Yae1 domain containing 1	5.3	17.9	3.4	10.5	0.0016
ENSG00000159921	GNE	glucosamine (UDP-N-acetyl)-2-epimerase/N-acetylmannosamine kinase	-2.2	17.8	-4.5	-1.2	0.00161
ENSG00000182944	EWSR1	EWS RNA-binding protein 1	-2.6	17.7	-5.3	-1.4	0.00163
ENSG00000268953	AC020952.1	N/A	2.6	17.5	1.3	5.4	0.00166
ENSG00000139746	RBM26	RNA binding motif protein 26	-2.4	17.5	-5.6	-1.3	0.00166
ENSG00000077044	DGKD	diacylglycerol kinase, delta 130kDa	-2.5	17.5	-5.1	-1.2	0.00166
ENSG00000163931	TKT	transketolase	2.6	17.4	1.3	4.8	0.00167
ENSG00000105220	GPI	glucose-6-phosphate isomerase	2.7	17.4	1.4	5.3	0.00167
ENSG00000056097	ZFR	zinc finger RNA binding protein	2.8	17.3	1.4	5.7	0.00168
ENSG00000131669	NINJ1	ninjurin 1	-2.7	17.2	-5.3	-1.5	0.00169
ENSG00000091164	TXNL1	thioredoxin-like 1	-3	17	-6.5	-1.4	0.0017
ENSG00000152578	GRIA4	glutamate receptor, ionotropic, AMPA 4	-4	16.9	-8.8	-1.6	0.00171
ENSG00000198034	RPS4X	ribosomal protein S4, X-linked	5.8	16.7	4.1	11.6	0.00173
ENSG00000124302	CHST8	carbohydrate (N-acetylgalactosamine 4-0) sulfotransferase 8	3.2	16.4	1.3	6.3	0.00176
ENSG00000089356	FXYD3	FXYD domain containing ion transport regulator 3	2.7	16.4	1.3	6.1	0.00176
ENSG00000132780	NASP	nuclear autoantigenic sperm protein (histone-binding)	5.3	16.3	2	11.4	0.00178
ENSG00000204278	TMEM235	transmembrane protein 235	4.5	15.9	2.3	9.8	0.00184
ENSG00000185697	MYBL1	v-myb avian myeloblastosis viral oncogene homolog-like 1	-2.9	15.8	-6.3	-1.2	0.00185
ENSG00000101057	MYBL2	v-myb avian myeloblastosis viral oncogene homolog-like 2	2.8	15.7	1.3	5.9	0.00186
ENSG00000105401	CDC37	cell division cycle 37	3.5	15.7	1.8	6.8	0.00186
ENSG00000109861	CTSC	cathepsin C	2.3	15.5	1.1	4.8	0.00188
ENSG00000116688	MFN2	mitofusin 2	4.1	15.4	2.1	8.7	0.00189
ENSG00000198563	DDX39B	DEAD (Asp-Glu-Ala-Asp) box polypeptide 39B	3	15.2	1.4	5.7	0.0019
ENSG00000187135	VSTM2B	V-set and transmembrane domain containing 2B	3.1	15.2	1.4	6.3	0.0019
ENSG00000134057	CCNB1	cyclin B1	2.3	15.1	1.1	5	0.00191
ENSG00000138107	ACTR1A	ARP1 actin-related protein 1 homolog A, centractin alpha (yeast)	-2.8	15	-6.2	-1.3	0.00192
ENSG00000123136	DDX39A	DEAD (Asp-Glu-Ala-Asp) box polypeptide 39A	2.5	14.6	1.2	5.2	0.00196
ENSG00000198298	ZNF485	zinc finger protein 485	2.5	14.6	1.2	4.8	0.00196
ENSG00000166359	WDR88	WD repeat domain 88	3.9	14.6	1.5	8.4	0.00196
ENSG00000121775	TMEM39B	transmembrane protein 39B	3.8	14.6	1.7	7.6	0.00196
ENSG00000244038	DDOST	dolichyl-diphosphooligosaccharide--protein glycosyltransferase subunit (non-catalytic)	6.1	14.5	3.3	12.6	0.00198
ENSG00000184007	PTP4A2	protein tyrosine phosphatase type IVA, member 2	3.5	14.5	1.4	7	0.00198
ENSG00000188342	GTF2F2	general transcription factor IIF, polypeptide 2, 30kDa	-2.5	14.4	-5.4	-1.1	0.00199
ENSG00000123179	EBPL	emopamil binding protein-like	6.5	14.3	4	13	0.00201
ENSG00000269897	COMMD3-BMI1	COMMD3-BMI1 readthrough	2.8	14.1	1.2	6	0.00204
ENSG00000081985	IL12RB2	interleukin 12 receptor, beta 2	4.5	13.7	2.1	9.6	0.00211
ENSG00000182481	KPNA2	karyopherin alpha 2 (RAG cohort 1, importin alpha 1)	4.5	13.7	2.5	10.1	0.00211
ENSG00000138246	DNAJC13	DnaJ (Hsp40) homolog, subfamily C, member 13	-2.9	13.7	-6	-1.3	0.00211
ENSG00000164985	PSIP1	PC4 and SFRS1 interacting protein 1	2.1	13.6	1	4.4	0.00214
ENSG00000032219	ARID4A	AT rich interactive domain 4A (RBP1-like)	-2.7	13.5	-5.6	-1.1	0.00215
ENSG00000185049	NELFA	negative elongation factor complex member A	4.4	13.5	1.7	9.3	0.00215
ENSG00000021488	SLC7A9	solute carrier family 7 (amino acid transporter light chain, bo,+ system), member 9	2.4	13.4	1.1	5.2	0.00217
ENSG00000197451	HNRNPAB	heterogeneous nuclear ribonucleoprotein A/B	-2.6	13.2	-5.7	-1.2	0.00222
ENSG00000197943	PLCG2	phospholipase C, gamma 2 (phosphatidylinositol-specific)	2.4	13.2	1	4.6	0.00222
ENSG00000146469	VIP	vasoactive intestinal peptide	-3.7	13.1	-8.3	-1.1	0.00225
ENSG00000175482	POLD4	polymerase (DNA-directed), delta 4, accessory subunit	-3.3	12.9	-7.2	-1.4	0.00231
ENSG00000178057	NDUFAF3	NADH dehydrogenase (ubiquinone) complex I, assembly factor 3	6.4	12.8	4	13	0.00234
ENSG00000149187	CELF1	CUGBP, Elav-like family member 1	2.2	12.8	1	4.9	0.00234
ENSG00000266953	RP11-618P17.4	N/A	3.8	12.7	1.8	7.5	0.00237
ENSG00000126787	DLGAP5	discs, large (Drosophila) homolog-associated protein 5	-2.5	12.6	-5	-1	0.0024
ENSG00000178904	DPY19L3	dpy-19-like 3 (C. elegans)	2.2	12.6	0.9	5.1	0.0024
ENSG00000198829	SUCNR1	succinate receptor 1	3.7	12.5	1.8	8	0.00243
ENSG00000145384	FABP2	fatty acid binding protein 2, intestinal	-3.4	12.5	-7.6	-1.5	0.00243
ENSG00000100888	CHD8	chromodomain helicase DNA binding protein 8	2.4	12.4	1	5.2	0.00247
ENSG00000125430	HS3ST3B1	heparan sulfate (glucosamine) 3-O-sulfotransferase 3B1	4.4	12.4	1.8	9.7	0.00247
ENSG00000165695	AK8	adenylate kinase 8	-2.8	12.3	-6.7	-1.2	0.0025
ENSG00000164708	PGAM2	phosphoglycerate mutase 2 (muscle)	2.8	12.3	1.1	6.7	0.0025
ENSG00000105171	POP4	processing of precursor 4, ribonuclease P/MRP subunit (S. cerevisiae)	2.8	12.3	1.2	6	0.0025
ENSG00000011485	PPP5C	protein phosphatase 5, catalytic subunit	2.5	12.3	1.2	5.6	0.0025
ENSG00000132142	ACACA	acetyl-CoA carboxylase alpha	2.8	12.2	1.1	7	0.00255
ENSG00000132773	TOE1	target of EGR1, member 1 (nuclear)	-2.2	12.2	-4.9	-1	0.00255
ENSG00000173638	SLC19A1	solute carrier family 19 (folate transporter), member 1	2.4	12.2	1	4.8	0.00255
ENSG00000126249	PDCD2L	programmed cell death 2-like	2.9	12.2	1.1	6.2	0.00255
ENSG00000162419	GMEB1	glucocorticoid modulatory element binding protein 1	3.4	12.2	1.3	8	0.00255
ENSG00000087586	AURKA	aurora kinase A	2.4	12.1	1	5.4	0.00259
ENSG00000004534	RBM6	RNA binding motif protein 6	2.8	12.1	1	6.6	0.00259
ENSG00000172977	KAT5	K(lysine) acetyltransferase 5	3.8	12.1	2.1	7.6	0.00259
ENSG00000164466	SFXN1	sideroflexin 1	2.3	12	1	4.3	0.00264
ENSG00000198848	CES1	carboxylesterase 1	-2.5	11.8	-5.6	-1.2	0.00274
ENSG00000147548	WHSC1L1	Wolf-Hirschhorn syndrome candidate 1-like 1	-2.8	11.8	-6.4	-1	0.00274
ENSG00000009335	UBE3C	ubiquitin protein ligase E3C	-2.4	11.8	-5.5	-1	0.00274
ENSG00000107798	LIPA	lipase A, lysosomal acid, cholesterol esterase	2.8	11.7	1.2	5.8	0.00279
ENSG00000205209	SCGB2B2	secretoglobin, family 2B, member 2	2.2	11.7	0.9	4.7	0.00279
ENSG00000233412	OR5H15	olfactory receptor, family 5, subfamily H, member 15	4.9	11.7	2.3	10.8	0.00279
ENSG00000067225	PKM	pyruvate kinase, muscle	4.8	11.6	2.8	9.8	0.00284
ENSG00000118513	MYB	v-myb avian myeloblastosis viral oncogene homolog	-2.3	11.6	-5	-1	0.00284
ENSG00000172845	SP3	Sp3 transcription factor	-2.5	11.5	-6.2	-1	0.00289
ENSG00000156970	BUB1B	BUB1 mitotic checkpoint serine/threonine kinase B	3.4	11.5	1.3	8.3	0.00289
ENSG00000261739	GOLGA8S	golgin A8 family, member S	3.4	11.4	1.5	7.8	0.00296
ENSG00000173473	SMARCC1	SWI/SNF related, matrix associated, actin dependent regulator of chromatin, subfamily c, member 1	2.4	11.4	0.9	5.1	0.00296
ENSG00000185897	FFAR3	free fatty acid receptor 3	3.1	11.4	1.3	7.8	0.00296
ENSG00000095574	IKZF5	IKAROS family zinc finger 5 (Pegasus)	-2.3	11.4	-4.9	-0.9	0.00296
ENSG00000169188	APEX2	APEX nuclease (apurinic/apyrimidinic endonuclease) 2	2.3	11.3	0.9	4.7	0.00303
ENSG00000131943	C19ORF12	chromosome 19 open reading frame 12	2.2	11.2	1	4.9	0.00309
ENSG00000143207	RFWD2	ring finger and WD repeat domain 2, E3 ubiquitin protein ligase	-2.4	11.2	-5.1	-1	0.00309
ENSG00000131941	RHPN2	rhophilin, Rho GTPase binding protein 2	2.6	11	0.9	5.5	0.00323
ENSG00000120802	TMPO	thymopoietin	-2.5	11	-5.3	-1	0.00323
ENSG00000269741	KLK9	kallikrein-related peptidase 9	4.2	11	2.1	9.4	0.00323
ENSG00000123415	SMUG1	single-strand-selective monofunctional uracil-DNA glycosylase 1	-2.5	11	-5.8	-1	0.00323
ENSG00000197415	VEPH1	ventricular zone expressed PH domain-containing 1	3.2	10.9	1.5	7.1	0.0033
ENSG00000156304	SCAF4	SR-related CTD-associated factor 4	3.5	10.9	1.6	8.7	0.0033
ENSG00000221957	KIR2DS4	killer cell immunoglobulin-like receptor, two domains, short cytoplasmic tail, 4	3.8	10.9	1.8	7.5	0.0033
ENSG00000108604	SMARCD2	SWI/SNF related, matrix associated, actin dependent regulator of chromatin, subfamily d, member 2	2.6	10.9	0.9	6.8	0.0033
ENSG00000198374	HIST1H2AL	histone cluster 1, H2al	2.8	10.8	1	7	0.00338
ENSG00000256861	RP11-512M8.5	N/A	-2.3	10.7	-5.2	-0.9	0.00346
ENSG00000180884	ZNF792	zinc finger protein 792	2.2	10.7	0.9	4.3	0.00346
ENSG00000096746	HNRNPH3	heterogeneous nuclear ribonucleoprotein H3 (2H9)	3.3	10.7	1.3	7.7	0.00346
ENSG00000158941	CCAR2	cell cycle and apoptosis regulator 2	-2.2	10.7	-4.9	-0.8	0.00346
ENSG00000268482	AL160274.1	N/A	3	10.6	1.3	6.3	0.00354
ENSG00000198326	TMEM239	transmembrane protein 239	-2.5	10.6	-5.3	-0.9	0.00354
ENSG00000185896	LAMP1	lysosomal-associated membrane protein 1	-2.3	10.6	-5.6	-0.9	0.00354
ENSG00000248098	BCKDHA	branched chain keto acid dehydrogenase E1, alpha polypeptide	2.5	10.6	1	5.8	0.00354
ENSG00000197933	ZNF823	zinc finger protein 823	2.9	10.6	1.3	6.9	0.00354
ENSG00000148229	POLE3	polymerase (DNA directed), epsilon 3, accessory subunit	3.4	10.6	1.2	8.2	0.00354
ENSG00000182334	OR5P3	olfactory receptor, family 5, subfamily P, member 3	3.6	10.5	1.6	7.3	0.00363
ENSG00000170312	CDK1	cyclin-dependent kinase 1	3.9	10.5	1.5	9	0.00363
ENSG00000066117	SMARCD1	SWI/SNF related, matrix associated, actin dependent regulator of chromatin, subfamily d, member 1	-2.2	10.5	-5	-0.8	0.00363
ENSG00000135451	TROAP	trophinin associated protein	-2.1	10.5	-4.6	-0.7	0.00363
ENSG00000130876	SLC7A10	solute carrier family 7 (neutral amino acid transporter light chain, asc system), member 10	2.9	10.5	1.1	5.7	0.00363
ENSG00000038358	EDC4	enhancer of mRNA decapping 4	-2.5	10.4	-5.3	-0.9	0.00372
ENSG00000067208	EVI5	ecotropic viral integration site 5	-2.1	10.4	-5.3	-0.8	0.00372
ENSG00000131495	NDUFA2	NADH dehydrogenase (ubiquinone) 1 alpha subcomplex, 2, 8kDa	3.7	10.4	1.8	8.4	0.00372
ENSG00000069122	GPR116	G protein-coupled receptor 116	3.2	10.4	1.2	7.7	0.00372
ENSG00000169122	FAM110B	family with sequence similarity 110, member B	3	10.4	1.5	7.2	0.00372
ENSG00000269549	AL031663.2	N/A	-2.3	10.3	-5.2	-0.9	0.00383
ENSG00000175792	RUVBL1	RuvB-like AAA ATPase 1	5	10.3	2.7	10	0.00383
ENSG00000172053	QARS	glutaminyl-tRNA synthetase	3.9	10.3	1.9	9.4	0.00383
ENSG00000104946	TBC1D17	TBC1 domain family, member 17	4.1	10.3	1.5	8.3	0.00383
ENSG00000167614	TTYH1	tweety family member 1	2.5	10.2	0.9	5.8	0.00392
ENSG00000204371	EHMT2	euchromatic histone-lysine N-methyltransferase 2	2.8	10.2	1.1	5.2	0.00392
ENSG00000143742	SRP9	signal recognition particle 9kDa	3	10.2	1.1	7.6	0.00392
ENSG00000197619	ZNF615	zinc finger protein 615	4.2	10.2	1.8	8.6	0.00392
ENSG00000150977	RILPL2	Rab interacting lysosomal protein-like 2	-2.4	10.2	-5.1	-0.8	0.00392
ENSG00000123338	NCKAP1L	NCK-associated protein 1-like	-2.1	10.2	-4.9	-0.8	0.00392
ENSG00000139220	PPFIA2	protein tyrosine phosphatase, receptor type, f polypeptide (PTPRF), interacting protein (liprin), alpha 2	-2.1	10.2	-7	-0.7	0.00392
ENSG00000132680	KIAA0907	KIAA0907	-2.1	10.2	-5.4	-0.8	0.00392
ENSG00000074319	TSG101	tumor susceptibility 101	-2.6	10.2	-6.1	-1	0.00392
ENSG00000086232	EIF2AK1	eukaryotic translation initiation factor 2-alpha kinase 1	3.5	10.1	1.6	7.4	0.00403
ENSG00000179151	EDC3	enhancer of mRNA decapping 3	-2.1	10.1	-5.2	-0.7	0.00403
ENSG00000076662	ICAM3	intercellular adhesion molecule 3	3	10.1	1.2	7.1	0.00403
ENSG00000185028	LRRC14B	leucine rich repeat containing 14B	4.6	10	2.7	9.8	0.00414
ENSG00000260027	HOXB7	homeobox B7	4.2	10	2.1	8.7	0.00414
ENSG00000086730	LAT2	linker for activation of T cells family, member 2	3.6	10	1.3	8	0.00414
ENSG00000143387	CTSK	cathepsin K	3.4	9.96	1.4	7.9	0.00419
ENSG00000143033	MTF2	metal response element binding transcription factor 2	-2.7	9.94	-6.6	-0.8	0.00421
ENSG00000082213	C5ORF22	chromosome 5 open reading frame 22	-2.3	9.91	-5.2	-0.7	0.00425
ENSG00000112237	CCNC	cyclin C	2.1	9.89	0.8	4.8	0.00427
ENSG00000133678	TMEM254	transmembrane protein 254	2.6	9.87	0.8	7.2	0.00429
ENSG00000143537	ADAM15	ADAM metallopeptidase domain 15	3	9.86	1	7.5	0.00431
ENSG00000184702	2018-09-05	septin 5	-3.2	9.77	-7.3	-1.2	0.00441
ENSG00000187048	CYP4A11	cytochrome P450, family 4, subfamily A, polypeptide 11	3.2	9.75	1.1	8.3	0.00443
ENSG00000043093	DCUN1D1	DCN1, defective in cullin neddylation 1, domain containing 1	2	9.74	0.7	4.5	0.00445
ENSG00000132522	GPS2	G protein pathway suppressor 2	2.8	9.72	1.3	6.6	0.00447
ENSG00000162959	MEMO1	mediator of cell motility 1	-2.5	9.71	-5.9	-0.9	0.00448
ENSG00000139971	C14ORF37	chromosome 14 open reading frame 37	2.7	9.71	0.9	6.4	0.00448
ENSG00000149925	ALDOA	aldolase A, fructose-bisphosphate	4	9.71	2	7.9	0.00448
ENSG00000225950	NTF4	neurotrophin 4	4.3	9.69	1	9.6	0.00451
ENSG00000089123	TASP1	taspase, threonine aspartase, 1	-2.1	9.67	-4.9	-0.7	0.00454
ENSG00000196844	PATE2	prostate and testis expressed 2	2.8	9.66	1.1	5.5	0.00455
ENSG00000142279	WTIP	Wilms tumor 1 interacting protein	2.1	9.64	0.8	4.8	0.00457
ENSG00000126266	FFAR1	free fatty acid receptor 1	2	9.64	0.7	5.2	0.00457
ENSG00000106113	CRHR2	corticotropin releasing hormone receptor 2	-2.5	9.6	-5.7	-0.8	0.00463
ENSG00000141012	GALNS	galactosamine (N-acetyl)-6-sulfatase	-2.4	9.55	-5.7	-0.7	0.00469
ENSG00000138629	UBL7	ubiquitin-like 7	-2.7	9.54	-6.6	-0.8	0.00471
ENSG00000048540	LMO3	LIM domain only 3 (rhombotin-like 2)	3.7	9.52	1.2	7.4	0.00473
ENSG00000149716	ORAOV1	oral cancer overexpressed 1	2.9	9.44	1.1	7.1	0.00485
ENSG00000110955	ATP5B	ATP synthase, H+ transporting, mitochondrial F1 complex, beta polypeptide	5.1	9.41	2.2	10.7	0.00489
ENSG00000099290	FAM21A	family with sequence similarity 21, member A	2.2	9.41	0.8	4.8	0.00489
ENSG00000266964	FXYD1	FXYD domain containing ion transport regulator 1	2.6	9.39	0.7	6.7	0.00492
ENSG00000244355	LY6G6D	lymphocyte antigen 6 complex, locus G6D	-2.4	9.37	-5.1	-0.7	0.00495
ENSG00000122566	HNRNPA2B1	heterogeneous nuclear ribonucleoprotein A2/B1	-3.4	9.35	-7.6	-1.3	0.00498
ENSG00000163273	NPPC	natriuretic peptide C	2.1	9.29	0.7	4.9	0.00506
ENSG00000272162	RP11-637O19.3	N/A	-2.5	9.26	-5	-1.4	0.00511
ENSG00000161980	POLR3K	polymerase (RNA) III (DNA directed) polypeptide K, 12.3 kDa	2.6	9.25	1	6.1	0.00513
ENSG00000134853	PDGFRA	platelet-derived growth factor receptor, alpha polypeptide	4.4	9.24	1.6	10.2	0.00514
ENSG00000164330	EBF1	early B-cell factor 1	-2.7	9.22	-7	-1	0.00518
ENSG00000167525	PROCA1	protein interacting with cyclin A1	-2.2	9.2	-6	3.6	0.00522
ENSG00000134324	LPIN1	lipin 1	2.5	9.19	1	5.3	0.00524
ENSG00000205076	LGALS7	lectin, galactoside-binding, soluble, 7	3.2	9.18	1.2	7.4	0.00525
ENSG00000028839	TBPL1	TBP-like 1	-2.4	9.17	-5.8	-0.7	0.00527
ENSG00000100926	TM9SF1	transmembrane 9 superfamily member 1	-2	9.1	-4.5	-0.7	0.00539
ENSG00000272333	KMT2B	lysine (K)-specific methyltransferase 2B	2.1	9.08	0.7	5.9	0.00543
ENSG00000142230	SAE1	SUMO1 activating enzyme subunit 1	6.3	9.08	3.8	12	0.00543
ENSG00000160957	RECQL4	RecQ protein-like 4	2.3	9.03	0.8	5.1	0.00552
ENSG00000169180	XPO6	exportin 6	-2	9.03	-4.4	-0.8	0.00552
ENSG00000059804	SLC2A3	solute carrier family 2 (facilitated glucose transporter), member 3	2.8	9.02	0.9	7.2	0.00554
ENSG00000197084	LCE1C	late cornified envelope 1C	4	9.02	1.8	9.4	0.00554
ENSG00000112081	SRSF3	serine/arginine-rich splicing factor 3	6.2	9.01	3.5	12	0.00556
ENSG00000174840	PDE12	phosphodiesterase 12	5.1	9.01	1.7	11.4	0.00556
ENSG00000137497	NUMA1	nuclear mitotic apparatus protein 1	2.6	9.01	0.8	6.5	0.00556
ENSG00000025796	SEC63	SEC63 homolog (S. cerevisiae)	4.2	9	1.2	9.1	0.00558
ENSG00000198597	ZNF536	zinc finger protein 536	2.2	8.97	0.7	4.3	0.00563
ENSG00000115289	PCGF1	polycomb group ring finger 1	-2.3	8.92	-6	-0.7	0.00574
ENSG00000176695	OR4F17	olfactory receptor, family 4, subfamily F, member 17	4.9	8.9	2.4	11.4	0.00578
ENSG00000105698	USF2	upstream transcription factor 2, c-fos interacting	2.3	8.83	0.7	4.8	0.00592
ENSG00000078674	PCM1	pericentriolar material 1	-2.7	8.82	-6.3	-0.9	0.00594
ENSG00000072864	NDE1	nudE neurodevelopment protein 1	-2.1	8.8	-5.8	-0.8	0.00598
ENSG00000111670	GNPTAB	N-acetylglucosamine-1-phosphate transferase, alpha and beta subunits	2	8.74	0.6	4.6	0.0061
ENSG00000167230	C17ORF78	chromosome 17 open reading frame 78	3.3	8.73	1.1	7.8	0.00612
ENSG00000172795	DCP2	decapping mRNA 2	-2.2	8.71	-5.4	-0.7	0.00616
ENSG00000204807	FAM27E2	family with sequence similarity 27, member E2	5	8.71	2.4	10.8	0.00616
ENSG00000183684	ALYREF	Aly/REF export factor	4	8.7	1.8	8	0.00618
ENSG00000204178	TMEM57	transmembrane protein 57	-2.4	8.69	-5.9	-0.7	0.0062
ENSG00000116237	ICMT	isoprenylcysteine carboxyl methyltransferase	2	8.69	0.6	4.1	0.0062
ENSG00000135709	KIAA0513	KIAA0513	4.4	8.67	1.9	10.6	0.00624
ENSG00000235194	PPP1R3E	protein phosphatase 1, regulatory subunit 3E	2.5	8.64	0.9	5.3	0.0063
ENSG00000232535	OR5H8P	olfactory receptor, family 5, subfamily H, member 8 pseudogene	4.4	8.62	1.5	10.4	0.00634
ENSG00000009954	BAZ1B	bromodomain adjacent to zinc finger domain, 1B	2.6	8.62	0.7	6.6	0.00634
ENSG00000137204	SLC22A7	solute carrier family 22 (organic anion transporter), member 7	4	8.61	1.4	9.2	0.00637
ENSG00000142208	AKT1	v-akt murine thymoma viral oncogene homolog 1	-2.2	8.59	-6	0.2	0.00641
ENSG00000128739	SNRPN	small nuclear ribonucleoprotein polypeptide N	-2.5	8.55	-6.3	-0.9	0.0065
ENSG00000130544	ZNF557	zinc finger protein 557	3.9	8.51	1.7	7.8	0.00658
ENSG00000147509	RGS20	regulator of G-protein signaling 20	-2	8.49	-7.2	-0.7	0.00663
ENSG00000108861	DUSP3	dual specificity phosphatase 3	2.4	8.46	0.7	5.7	0.0067
ENSG00000100632	ERH	enhancer of rudimentary homolog (Drosophila)	5.6	8.45	3	11	0.00673
ENSG00000089902	RCOR1	REST corepressor 1	2.7	8.44	1.1	6.5	0.00675
ENSG00000136830	FAM129B	family with sequence similarity 129, member B	3.8	8.39	1.3	7.6	0.00687
ENSG00000168000	BSCL2	Berardinelli-Seip congenital lipodystrophy 2 (seipin)	-2	8.39	-5	-0.6	0.00687
ENSG00000113716	HMGXB3	HMG box domain containing 3	-2.2	8.38	-5.4	-0.7	0.0069
ENSG00000245848	CEBPA	CCAAT/enhancer binding protein (C/EBP), alpha	2	8.37	0.6	4.2	0.00692
ENSG00000174197	MGA	MGA, MAX dimerization protein	-1.8	8.36	-5	-0.5	0.00695
ENSG00000203730	TEDDM1	transmembrane epididymal protein 1	2.1	8.34	0.7	5.7	0.007
ENSG00000118263	KLF7	Kruppel-like factor 7 (ubiquitous)	-2.3	8.34	-5.1	-0.6	0.007
ENSG00000132518	GUCY2D	guanylate cyclase 2D, membrane (retina-specific)	-2.8	8.33	-6.4	-0.9	0.00702
ENSG00000197748	WDR96	N/A	3.6	8.32	1.1	7.4	0.00705
ENSG00000169019	COMMD8	COMM domain containing 8	2	8.31	0.7	5.8	0.00708
ENSG00000179218	CALR	calreticulin	2.8	8.3	0.8	6.7	0.0071
ENSG00000119401	TRIM32	tripartite motif containing 32	2.2	8.23	0.6	6.1	0.00729
ENSG00000102921	N4BP1	NEDD4 binding protein 1	-2.1	8.22	-5	-0.6	0.00732
ENSG00000146828	SLC12A9	solute carrier family 12, member 9	-3.3	8.19	-7	-1.5	0.00741
ENSG00000100387	RBX1	ring-box 1, E3 ubiquitin protein ligase	-3	8.16	-7	1	0.00749
ENSG00000151893	CACUL1	CDK2-associated, cullin domain 1	-2.1	8.15	-5.1	-0.6	0.00752
ENSG00000007216	SLC13A2	solute carrier family 13 (sodium-dependent dicarboxylate transporter), member 2	-2.6	8.13	-6.3	-0.8	0.00758
ENSG00000180919	OR56B4	olfactory receptor, family 56, subfamily B, member 4	-2.2	8.12	-5.4	-0.7	0.00761
ENSG00000235942	LCE6A	late cornified envelope 6A	2.6	8.1	0.7	5.9	0.00767
ENSG00000179066	AC020907.1	N/A	1.7	8.09	0.6	3.6	0.0077
ENSG00000179468	OR9A2	olfactory receptor, family 9, subfamily A, member 2	-1.7	8.08	-4.1	-0.6	0.00773
ENSG00000184787	UBE2G2	ubiquitin-conjugating enzyme E2G 2	5.5	8.06	2.4	11	0.00778
ENSG00000165807	PPP1R36	protein phosphatase 1, regulatory subunit 36	2.1	8.05	0.6	5.2	0.00782
ENSG00000073969	NSF	N-ethylmaleimide-sensitive factor	3.5	8.03	1.5	8.7	0.00787
ENSG00000167359	OR51I1	olfactory receptor, family 51, subfamily I, member 1	3.2	8.03	1.4	7.6	0.00787
ENSG00000162511	LAPTM5	lysosomal protein transmembrane 5	-2.5	8.01	-6.7	-0.7	0.00794
ENSG00000186635	ARAP1	ArfGAP with RhoGAP domain, ankyrin repeat and PH domain 1	4.4	7.99	1.6	10.7	0.008
ENSG00000135736	CCDC102A	coiled-coil domain containing 102A	-2.4	7.98	-5.4	-0.6	0.00803
ENSG00000155367	PPM1J	protein phosphatase, Mg2+/Mn2+ dependent, 1J	-1.8	7.96	-4.4	-0.5	0.00809
ENSG00000159082	SYNJ1	synaptojanin 1	-2	7.95	-4.2	-0.5	0.00812
ENSG00000141510	TP53	tumor protein p53	-2.1	7.95	-5.3	-0.5	0.00812
ENSG00000198492	YTHDF2	YTH domain family, member 2	-3.1	7.94	-8	-0.9	0.00816
ENSG00000126767	ELK1	ELK1, member of ETS oncogene family	2.7	7.93	0.6	7	0.00819
ENSG00000269469	CTD-3148I10.9	N/A	3	7.93	1	6.3	0.00819
ENSG00000179046	TRIML2	tripartite motif family-like 2	2.8	7.92	0.9	6.3	0.00822
ENSG00000117419	ERI3	ERI1 exoribonuclease family member 3	3.4	7.91	1.4	6.7	0.00826
ENSG00000130529	TRPM4	transient receptor potential cation channel, subfamily M, member 4	1.9	7.91	0.5	4.6	0.00826
ENSG00000181617	FDCSP	follicular dendritic cell secreted protein	-2.2	7.9	-5.8	-0.6	0.00829
ENSG00000105675	ATP4A	ATPase, H+/K+ exchanging, alpha polypeptide	2.1	7.89	0.7	5.2	0.00832
ENSG00000066336	SPI1	Spi-1 proto-oncogene	2.1	7.88	0.6	4.9	0.00835
ENSG00000124214	STAU1	staufen double-stranded RNA binding protein 1	-2	7.87	-5.2	-0.5	0.00839
ENSG00000187866	FAM122A	family with sequence similarity 122A	2.4	7.85	0.6	6.7	0.00845
ENSG00000006837	CDKL3	cyclin-dependent kinase-like 3	-2	7.85	-4.9	-0.5	0.00845
ENSG00000103811	CTSH	cathepsin H	2.5	7.84	0.8	6	0.00848
ENSG00000139842	CUL4A	cullin 4A	-2.4	7.84	-5.8	-0.6	0.00848
ENSG00000139624	CERS5	ceramide synthase 5	-2.2	7.83	-5.4	-0.7	0.00851
ENSG00000180815	MAP3K15	mitogen-activated protein kinase kinase kinase 15	3.1	7.82	1	8.1	0.00854
ENSG00000112659	CUL9	cullin 9	-2.3	7.81	-6	-0.7	0.00858
ENSG00000005339	CREBBP	CREB binding protein	1.7	7.8	0.6	4.2	0.00862
ENSG00000178934	LGALS7B	lectin, galactoside-binding, soluble, 7B	1.9	7.77	0.5	4.3	0.00873
ENSG00000101782	RIOK3	RIO kinase 3	-2.3	7.77	-6.5	-0.5	0.00873
ENSG00000162188	GNG3	guanine nucleotide binding protein (G protein), gamma 3	3.9	7.76	2	8.9	0.00876
ENSG00000141577	AZI1	N/A	-2.7	7.75	-8	2.2	0.00879
ENSG00000198624	CCDC69	coiled-coil domain containing 69	4	7.74	1.3	9.2	0.00883
ENSG00000146701	MDH2	malate dehydrogenase 2, NAD (mitochondrial)	-1.6	7.7	-4	-0.5	0.00898
ENSG00000169919	GUSB	glucuronidase, beta	-1.9	7.69	-5	-0.4	0.00901
ENSG00000158406	HIST1H4H	histone cluster 1, H4h	5.1	7.67	1.8	10.7	0.00909
ENSG00000122674	CCZ1	CCZ1 vacuolar protein trafficking and biogenesis associated homolog (S. cerevisiae)	2.6	7.66	1	6.8	0.00913
ENSG00000165471	MBL2	mannose-binding lectin (protein C) 2, soluble	3.2	7.66	0.9	8.7	0.00913
ENSG00000204363	SPANXN5	SPANX family, member N5	2.8	7.66	1.1	6.5	0.00913
ENSG00000041802	LSG1	large 60S subunit nuclear export GTPase 1	5.8	7.65	2.9	12	0.00916
ENSG00000086062	B4GALT1	UDP-Gal:betaGlcNAc beta 1,4- galactosyltransferase, polypeptide 1	-2	7.62	-4.6	-0.6	0.00928
ENSG00000177992	SPATA31E1	SPATA31 subfamily E, member 1	-2.5	7.62	-6.2	-0.7	0.00928
ENSG00000105711	SCN1B	sodium channel, voltage-gated, type I, beta subunit	2.2	7.61	0.6	5.1	0.00932
ENSG00000140632	GLYR1	glyoxylate reductase 1 homolog (Arabidopsis)	-2	7.59	-4.7	-0.7	0.0094
ENSG00000152034	MCHR2	melanin-concentrating hormone receptor 2	3.7	7.59	1.6	8.8	0.0094
ENSG00000169375	SIN3A	SIN3 transcription regulator family member A	-2.9	7.58	-6.5	-0.8	0.00944
ENSG00000088986	DYNLL1	dynein, light chain, LC8-type 1	3.1	7.56	0.8	7.4	0.00953
ENSG00000222000	AC092675.3	N/A	2.4	7.56	0.8	6.2	0.00953
ENSG00000028528	SNX1	sorting nexin 1	-2.1	7.55	-6	3.4	0.00958
ENSG00000123066	MED13L	mediator complex subunit 13-like	3	7.54	0.8	7	0.00962
ENSG00000095585	BLNK	B-cell linker	1.9	7.53	0.4	5.2	0.00965
ENSG00000166508	MCM7	minichromosome maintenance complex component 7	6.1	7.53	-1.9	12	0.00965
ENSG00000198826	ARHGAP11A	Rho GTPase activating protein 11A	2.5	7.52	-2.2	6	0.00969
ENSG00000214021	TTLL3	tubulin tyrosine ligase-like family, member 3	3.5	7.52	1.4	7.7	0.00969
ENSG00000171862	PTEN	phosphatase and tensin homolog	-2.2	7.5	-6	5.8	0.00978
ENSG00000162613	FUBP1	far upstream element (FUSE) binding protein 1	-2.5	7.5	-5.4	-0.6	0.00978
ENSG00000182771	GRID1	glutamate receptor, ionotropic, delta 1	2.1	7.5	0.6	5	0.00978
ENSG00000121774	KHDRBS1	KH domain containing, RNA binding, signal transduction associated 1	1.5	7.49	0.5	4.2	0.00982
ENSG00000136449	MYCBPAP	MYCBP associated protein	-2.3	7.47	-6.1	-0.6	0.00991
ENSG00000146006	LRRTM2	leucine rich repeat transmembrane neuronal 2	6.2	7.47	3.2	12	0.00991
ENSG00000173627	APOBEC4	apolipoprotein B mRNA editing enzyme, catalytic polypeptide-like 4 (putative)	-3.1	7.45	-7	-1.3	0.01
ENSG00000119446	RBM18	RNA binding motif protein 18	-2.4	7.44	-6.1	-0.6	0.01
ENSG00000099617	EFNA2	ephrin-A2	-2.1	7.43	-6.3	-0.6	0.0101
ENSG00000081913	PHLPP1	PH domain and leucine rich repeat protein phosphatase 1	2.8	7.43	1	5.7	0.0101
ENSG00000077312	SNRPA	small nuclear ribonucleoprotein polypeptide A	4.4	7.42	1.5	10.6	0.0101
ENSG00000268341	L47234.1	N/A	3.9	7.41	1.3	9.4	0.0102
ENSG00000181315	ZNF322	zinc finger protein 322	5.2	7.39	2.4	11	0.0102
ENSG00000163596	ICA1L	islet cell autoantigen 1,69kDa-like	-3.5	7.39	-7.7	-0.8	0.0102
ENSG00000185651	UBE2L3	ubiquitin-conjugating enzyme E2L 3	-2.1	7.39	-5.3	-0.6	0.0102
ENSG00000006831	ADIPOR2	adiponectin receptor 2	3.4	7.36	1.1	8.5	0.0104
ENSG00000198015	MRPL42	mitochondrial ribosomal protein L42	3	7.35	0.9	7.4	0.0104
ENSG00000009709	PAX7	paired box 7	-2.8	7.35	-6.5	-0.7	0.0104
ENSG00000035681	NSMAF	neutral sphingomyelinase (N-SMase) activation associated factor	2.2	7.35	0.5	5.3	0.0104
ENSG00000198535	C2CD4A	C2 calcium-dependent domain containing 4A	2.6	7.35	0.8	6.3	0.0104
ENSG00000150316	CWC15	CWC15 spliceosome-associated protein	2.2	7.34	0.4	6.1	0.0105
ENSG00000121289	CEP89	centrosomal protein 89kDa	2.3	7.33	0.7	6.1	0.0105
ENSG00000267881	CEA	carcinoembryonic antigen gene family	2.5	7.32	1.1	5.7	0.0105
ENSG00000102030	NAA10	N(alpha)-acetyltransferase 10, NatA catalytic subunit	4.9	7.31	2.2	10	0.0106
ENSG00000196532	HIST1H3C	histone cluster 1, H3c	4	7.3	2	9.9	0.0106
ENSG00000232869	TRBV29-1	T cell receptor beta variable 29-1	-2.1	7.3	-5.9	-0.4	0.0106
ENSG00000131051	RBM39	RNA binding motif protein 39	3	7.29	1	7.5	0.0107
ENSG00000129315	CCNT1	cyclin T1	-1.7	7.27	-4.7	-0.4	0.0108
ENSG00000187258	NPSR1	neuropeptide S receptor 1	-2.3	7.27	-5.6	-0.6	0.0108
ENSG00000183891	TTC32	tetratricopeptide repeat domain 32	3.3	7.26	1.1	8.4	0.0108
ENSG00000198498	TMA16	translation machinery associated 16 homolog (S. cerevisiae)	3.4	7.25	0.9	7.5	0.0109
ENSG00000223802	CERS1	ceramide synthase 1	-2.3	7.25	-6	6.8	0.0109
ENSG00000137218	FRS3	fibroblast growth factor receptor substrate 3	2.2	7.24	0.6	5.4	0.0109
ENSG00000189079	ARID2	AT rich interactive domain 2 (ARID, RFX-like)	2.1	7.24	0.5	4.3	0.0109
ENSG00000115234	SNX17	sorting nexin 17	2.7	7.24	0.9	6.5	0.0109
ENSG00000231068	KRTAP21-3	keratin associated protein 21-3	3.4	7.23	1	8.4	0.011
ENSG00000136051	KIAA1033	KIAA1033	2.9	7.21	1.3	5.9	0.0111
ENSG00000175376	EIF1AD	eukaryotic translation initiation factor 1A domain containing	5.9	7.21	2.9	12	0.0111
ENSG00000183648	NDUFB1	NADH dehydrogenase (ubiquinone) 1 beta subcomplex, 1, 7kDa	-2.4	7.21	-6.3	-0.6	0.0111
ENSG00000178028	DMAP1	DNA methyltransferase 1 associated protein 1	2.6	7.2	1.1	6.7	0.0111
ENSG00000211713	TRBV6-4	T cell receptor beta variable 6-4	3.3	7.2	-1.5	9	0.0111
ENSG00000164252	AGGF1	angiogenic factor with G patch and FHA domains 1	2.8	7.2	0.8	7.7	0.0111
ENSG00000173597	SULT1B1	sulfotransferase family, cytosolic, 1B, member 1	-1.7	7.2	-5	0.3	0.0111
ENSG00000162702	ZNF281	zinc finger protein 281	-1.9	7.19	-4.3	-0.5	0.0112
ENSG00000068650	ATP11A	ATPase, class VI, type 11A	-2.7	7.17	-6.7	-0.7	0.0113
ENSG00000109736	MFSD10	major facilitator superfamily domain containing 10	-1.9	7.16	-4.5	-0.5	0.0113
ENSG00000178927	C17ORF62	chromosome 17 open reading frame 62	2.3	7.15	0.7	5.5	0.0114
ENSG00000127946	HIP1	huntingtin interacting protein 1	-2.7	7.15	-6.7	-0.8	0.0114
ENSG00000180438	TPRXL	tetra-peptide repeat homeobox-like	2.5	7.14	0.8	4.7	0.0114
ENSG00000089486	CDIP1	cell death-inducing p53 target 1	-2	7.13	-7	1.4	0.0115
ENSG00000167522	ANKRD11	ankyrin repeat domain 11	-2.5	7.13	-6.4	-0.7	0.0115
ENSG00000008130	NADK	NAD kinase	3.2	7.12	0.9	7.3	0.0115
ENSG00000127947	PTPN12	protein tyrosine phosphatase, non-receptor type 12	-2	7.11	-5.3	-0.5	0.0116
ENSG00000197153	HIST1H3J	histone cluster 1, H3j	2.9	7.09	0.7	8	0.0117
ENSG00000110063	DCPS	decapping enzyme, scavenger	5.4	7.08	2.1	11	0.0117
ENSG00000118197	DDX59	DEAD (Asp-Glu-Ala-Asp) box polypeptide 59	3.4	7.08	1.1	8.4	0.0117
ENSG00000204653	ASPDH	aspartate dehydrogenase domain containing	3.1	7.07	1.2	7.8	0.0118
ENSG00000165283	STOML2	stomatin (EPB72)-like 2	-2.5	7.06	-5.9	-0.7	0.0118
ENSG00000069329	VPS35	vacuolar protein sorting 35 homolog (S. cerevisiae)	2	7.06	0.6	5	0.0118
ENSG00000205795	CYS1	cystin 1	2.5	7.06	0.5	6.1	0.0118
ENSG00000113068	PFDN1	prefoldin subunit 1	-2	7.05	-6	0.2	0.0119
ENSG00000101997	CCDC22	coiled-coil domain containing 22	1.9	7.05	0.6	5	0.0119
ENSG00000130311	DDA1	DET1 and DDB1 associated 1	-2.8	7.05	-6.4	-0.8	0.0119
ENSG00000083807	SLC27A5	solute carrier family 27 (fatty acid transporter), member 5	1.9	7.01	0.6	5	0.0121
ENSG00000090238	YPEL3	yippee-like 3 (Drosophila)	-2.3	7.01	-6.2	-0.6	0.0121
ENSG00000205791	LOH12CR2	loss of heterozygosity, 12, chromosomal region 2 (non-protein coding)	-2.6	6.98	-6.4	-0.7	0.0123
ENSG00000139675	HNRNPA1L2	heterogeneous nuclear ribonucleoprotein A1-like 2	4	6.97	1.8	9	0.0123
ENSG00000186638	KIF24	kinesin family member 24	-3.4	6.97	-8	-0.9	0.0123
ENSG00000148090	AUH	AU RNA binding protein/enoyl-CoA hydratase	3.6	6.96	1.2	8.5	0.0124
ENSG00000271043	MTRNR2L2	MT-RNR2-like 2	4.4	6.95	2.1	8	0.0124
ENSG00000173744	AGFG1	ArfGAP with FG repeats 1	-2.6	6.95	-5.6	-0.6	0.0124
ENSG00000125846	ZNF133	zinc finger protein 133	-1.8	6.93	-4.8	-0.4	0.0126
ENSG00000129810	SGOL1	shugoshin-like 1 (S. pombe)	-1.8	6.93	-5.3	-0.5	0.0126
ENSG00000182372	CLN8	ceroid-lipofuscinosis, neuronal 8 (epilepsy, progressive with mental retardation)	2.7	6.93	0.6	6.8	0.0126
ENSG00000027001	MIPEP	mitochondrial intermediate peptidase	3.9	6.93	1.2	8	0.0126
ENSG00000106086	PLEKHA8	pleckstrin homology domain containing, family A (phosphoinositide binding specific) member 8	2.2	6.91	0.6	5.3	0.0127
ENSG00000105287	PRKD2	protein kinase D2	1.7	6.91	0.4	4.1	0.0127
ENSG00000213965	NUDT19	nudix (nucleoside diphosphate linked moiety X)-type motif 19	1.7	6.9	0.5	4.2	0.0127
ENSG00000148843	PDCD11	programmed cell death 11	-2.1	6.89	-5.2	-0.5	0.0128
ENSG00000086189	DIMT1	DIM1 dimethyladenosine transferase 1 homolog (S. cerevisiae)	3.2	6.88	1.1	8	0.0128
ENSG00000079393	DUSP13	dual specificity phosphatase 13	-1.8	6.88	-4.8	-0.4	0.0128
ENSG00000172985	SH3RF3	SH3 domain containing ring finger 3	2.5	6.87	0.1	7	0.0129
ENSG00000174595	KLF14	Kruppel-like factor 14	4.9	6.86	1.8	10	0.013
ENSG00000153002	CPB1	carboxypeptidase B1 (tissue)	-2.2	6.85	-5.2	-0.5	0.013
ENSG00000164815	ORC5	origin recognition complex, subunit 5	2.5	6.85	0.6	7.2	0.013
ENSG00000170542	SERPINB9	serpin peptidase inhibitor, clade B (ovalbumin), member 9	-2.7	6.83	-7	0.4	0.0131
ENSG00000011258	MBTD1	mbt domain containing 1	2.4	6.83	0.5	6.6	0.0131
ENSG00000170266	GLB1	galactosidase, beta 1	1.8	6.82	0.5	4.4	0.0132
ENSG00000172531	PPP1CA	protein phosphatase 1, catalytic subunit, alpha isozyme	-1.7	6.82	-4.4	-0.4	0.0132
ENSG00000126216	TUBGCP3	tubulin, gamma complex associated protein 3	-2.1	6.81	-6	6.1	0.0133
ENSG00000160209	PDXK	pyridoxal (pyridoxine, vitamin B6) kinase	5.4	6.8	2.3	11	0.0133
ENSG00000123374	CDK2	cyclin-dependent kinase 2	2.1	6.8	0.4	5.5	0.0133
ENSG00000204393	RP11-410N8.4	N/A	-2.9	6.8	-7	-0.8	0.0133
ENSG00000184566	AC132216.1	N/A	-2	6.8	-4.5	-0.5	0.0133
ENSG00000137812	CASC5	cancer susceptibility candidate 5	-2	6.8	-6	1.7	0.0133
ENSG00000089053	ANAPC5	anaphase promoting complex subunit 5	-1.9	6.79	-4.9	-0.4	0.0134
ENSG00000078403	MLLT10	myeloid/lymphoid or mixed-lineage leukemia (trithorax homolog, Drosophila); translocated to, 10	2	6.79	0.4	5.1	0.0134
ENSG00000197816	CCDC180	coiled-coil domain containing 180	-2.4	6.78	-5.7	-0.6	0.0134
ENSG00000114480	GBE1	glucan (1,4-alpha-), branching enzyme 1	-1.9	6.76	-5.3	-0.4	0.0136
ENSG00000155506	LARP1	La ribonucleoprotein domain family, member 1	-1.6	6.76	-5	0	0.0136
ENSG00000113273	ARSB	arylsulfatase B	-2.1	6.76	-4.9	-0.4	0.0136
ENSG00000273269	RP11-761B3.1	N/A	-2.8	6.76	-7	6.5	0.0136
ENSG00000173674	EIF1AX	eukaryotic translation initiation factor 1A, X-linked	2.8	6.74	1.2	6.9	0.0137
ENSG00000145349	CAMK2D	calcium/calmodulin-dependent protein kinase II delta	-1.9	6.74	-4.5	-0.4	0.0137
ENSG00000116478	HDAC1	histone deacetylase 1	1.8	6.74	0.5	4.2	0.0137
ENSG00000166189	HPS6	Hermansky-Pudlak syndrome 6	-2.2	6.73	-6.5	-0.5	0.0137
ENSG00000248672	LY75-CD302	LY75-CD302 readthrough	5.2	6.73	1.7	11	0.0137
ENSG00000137100	DCTN3	dynactin 3 (p22)	-3	6.73	-6.7	-0.9	0.0137
ENSG00000142512	SIGLEC10	sialic acid binding Ig-like lectin 10	3.2	6.73	0.8	9.5	0.0137
ENSG00000170866	LILRA3	leukocyte immunoglobulin-like receptor, subfamily A (without TM domain), member 3	5.2	6.72	2.1	11	0.0138
ENSG00000254901	MEF2BNB	MEF2B neighbor	2.3	6.71	0.4	6.3	0.0139
ENSG00000211445	GPX3	glutathione peroxidase 3 (plasma)	-2.2	6.71	-5.8	-0.5	0.0139
ENSG00000137675	MMP27	matrix metallopeptidase 27	2.6	6.7	0.7	6.7	0.0139
ENSG00000184857	TMEM186	transmembrane protein 186	2.2	6.7	0.5	5.2	0.0139
ENSG00000126822	PLEKHG3	pleckstrin homology domain containing, family G (with RhoGef domain) member 3	2.4	6.7	0.5	5.8	0.0139
ENSG00000184990	SIVA1	SIVA1, apoptosis-inducing factor	-2.9	6.7	-6.8	-0.9	0.0139
ENSG00000177938	CAPZA3	capping protein (actin filament) muscle Z-line, alpha 3	-2.1	6.67	-5.5	-0.3	0.0141
ENSG00000143869	GDF7	growth differentiation factor 7	2.3	6.67	0.4	7.6	0.0141
ENSG00000153487	ING1	inhibitor of growth family, member 1	-1.6	6.66	-3.6	-0.5	0.0142
ENSG00000120616	EPC1	enhancer of polycomb homolog 1 (Drosophila)	-1.9	6.66	-4.4	-0.4	0.0142
ENSG00000104974	LILRA1	leukocyte immunoglobulin-like receptor, subfamily A (with TM domain), member 1	2	6.66	0.4	6.2	0.0142
ENSG00000131873	CHSY1	chondroitin sulfate synthase 1	2.4	6.65	0.6	6.2	0.0143
ENSG00000100722	ZC3H14	zinc finger CCCH-type containing 14	-2.6	6.64	-6	-0.7	0.0143
ENSG00000179774	ATOH7	atonal homolog 7 (Drosophila)	-2.1	6.64	-5.5	-0.4	0.0143
ENSG00000142546	NOSIP	nitric oxide synthase interacting protein	1.7	6.64	0.4	3.5	0.0143
ENSG00000104081	BMF	Bcl2 modifying factor	-3.1	6.63	-7	-0.9	0.0144
ENSG00000172139	SLC9C1	solute carrier family 9, subfamily C (Na+-transporting carboxylic acid decarboxylase), member 1	-2	6.63	-5.2	-0.5	0.0144
ENSG00000138119	MYOF	myoferlin	2.7	6.63	0.6	7.3	0.0144
ENSG00000182183	FAM159A	family with sequence similarity 159, member A	-1.6	6.63	-3.8	-0.5	0.0144
ENSG00000182923	CEP63	centrosomal protein 63kDa	3.7	6.61	1.1	8.6	0.0145
ENSG00000124243	BCAS4	breast carcinoma amplified sequence 4	3.1	6.61	1.2	6.9	0.0145
ENSG00000197927	C2ORF27A	chromosome 2 open reading frame 27A	2.6	6.6	0.7	6.4	0.0146
ENSG00000158092	NCK1	NCK adaptor protein 1	2	6.6	0.5	5.1	0.0146
ENSG00000167588	GPD1	glycerol-3-phosphate dehydrogenase 1 (soluble)	-2.5	6.6	-6	0.1	0.0146
ENSG00000172575	RASGRP1	RAS guanyl releasing protein 1 (calcium and DAG-regulated)	-2.1	6.6	-5.4	-0.3	0.0146
ENSG00000151725	CENPU	centromere protein U	-2	6.6	-5.5	-0.5	0.0146
ENSG00000120686	UFM1	ubiquitin-fold modifier 1	-2.2	6.59	-5.7	-0.4	0.0147
ENSG00000198551	ZNF627	zinc finger protein 627	4.2	6.59	1.4	9.8	0.0147
ENSG00000158477	CD1A	CD1a molecule	2.4	6.58	0.5	7.4	0.0147
ENSG00000124251	TP53TG5	TP53 target 5	2.9	6.56	0.8	8.5	0.0149
ENSG00000176248	ANAPC2	anaphase promoting complex subunit 2	-1.7	6.55	-4.6	-0.4	0.0149
ENSG00000130881	LRP3	low density lipoprotein receptor-related protein 3	1.7	6.54	0.4	4.2	0.015
ENSG00000272325	NUDT3	nudix (nucleoside diphosphate linked moiety X)-type motif 3	4.6	6.54	1.9	9	0.015
ENSG00000197852	FAM212B	family with sequence similarity 212, member B	3.1	6.53	0.7	8	0.0151
ENSG00000080854	IGSF9B	immunoglobulin superfamily, member 9B	2.4	6.53	0.7	5.7	0.0151
ENSG00000102144	PGK1	phosphoglycerate kinase 1	2.9	6.53	-1.5	6	0.0151
ENSG00000268614	CTD-2207O23.10	N/A	1.9	6.53	0.4	5.6	0.0151
ENSG00000161847	RAVER1	ribonucleoprotein, PTB-binding 1	-1.7	6.53	-4.9	-0.3	0.0151
ENSG00000173581	CCDC106	coiled-coil domain containing 106	1.9	6.53	0.4	5.5	0.0151
ENSG00000155975	VPS37A	vacuolar protein sorting 37 homolog A (S. cerevisiae)	-2.4	6.52	-5.6	-0.5	0.0151
ENSG00000168124	OR1F1	olfactory receptor, family 1, subfamily F, member 1	-1.7	6.52	-3.9	-0.5	0.0151
ENSG00000239511	POM121L7	POM121 transmembrane nucleoporin-like 7	2.9	6.51	1.1	5.9	0.0152
ENSG00000186827	TNFRSF4	tumor necrosis factor receptor superfamily, member 4	2.9	6.5	0.7	7.5	0.0153
ENSG00000213079	SCAF8	SR-related CTD-associated factor 8	-2.1	6.5	-6	-0.2	0.0153
ENSG00000153944	MSI2	musashi RNA-binding protein 2	-2	6.49	-5.8	-0.5	0.0153
ENSG00000158793	NIT1	nitrilase 1	5.2	6.49	1.7	10.9	0.0153
ENSG00000065427	KARS	lysyl-tRNA synthetase	5.3	6.48	1.6	10	0.0154
ENSG00000177602	GSG2	germ cell associated 2 (haspin)	-2	6.48	-6	-0.4	0.0154
ENSG00000177542	SLC25A22	solute carrier family 25 (mitochondrial carrier: glutamate), member 22	2.6	6.48	0.6	7.3	0.0154
ENSG00000147862	NFIB	nuclear factor I/B	5.4	6.48	2.2	11	0.0154
ENSG00000114648	KLHL18	kelch-like family member 18	4.8	6.47	1.9	10	0.0155
ENSG00000089248	ERP29	endoplasmic reticulum protein 29	2.3	6.46	-3.3	7	0.0156
ENSG00000185860	C1ORF110	chromosome 1 open reading frame 110	5.8	6.46	-2.1	12	0.0156
ENSG00000165699	TSC1	tuberous sclerosis 1	-2.6	6.46	-6.6	-0.6	0.0156
ENSG00000165716	FAM69B	family with sequence similarity 69, member B	4.2	6.45	1.5	10	0.0156
ENSG00000169906	S100G	S100 calcium binding protein G	-2.2	6.45	-6	0.3	0.0156
ENSG00000003756	RBM5	RNA binding motif protein 5	2	6.44	0.5	5.8	0.0157
ENSG00000148335	NTMT1	N-terminal Xaa-Pro-Lys N-methyltransferase 1	4	6.44	1.1	9.2	0.0157
ENSG00000140519	RHCG	Rh family, C glycoprotein	2.5	6.44	0.6	6	0.0157
ENSG00000101367	MAPRE1	microtubule-associated protein, RP/EB family, member 1	2.4	6.44	0.5	6.7	0.0157
ENSG00000136297	MMD2	Miyoshi muscular dystrophy 2	-2.3	6.43	-5.7	-0.4	0.0158
ENSG00000196381	ZNF781	zinc finger protein 781	3.4	6.43	1	8.9	0.0158
ENSG00000104901	DKKL1	dickkopf-like 1	2.4	6.43	0.5	7	0.0158
[truncated: 19,920 more rows]
